# Supplementary material for: Excess S-Adenosylmethionine inhibits methylation via catabolism to adenine
Source: Research Square preprint supplement (doi:10.21203/rs.3.rs-934744/v1), 2021-09-24
Supplement: Supplementary file 5 [file a643840a089e1540b4112fdc.xlsx]

## Sheet: all genes logCPM
GeneID	Name	CTL 1	CTL 2	CTL 3	Adenine 1	Adenine 2	Adenine 3	DZ 1	DZ 2	DZ 3	SAM 1	SAM 2	SAM 3
ENSMUSG00000032715.10	Trib3	7.83587	7.812	7.83549	6.55039	6.58346	6.6043	7.65939	7.71728	7.7266	3.77661	3.8442	3.70055
ENSMUSG00000039518.8	Cdsn	9.91814	9.869	9.91805	8.1467	8.12731	8.27633	9.74455	9.70767	9.7786	6.02247	5.99344	6.06661
ENSMUSG00000020256.15	Aldh1l2	9.88972	9.852	9.84914	9.09493	9.14254	9.23689	10.0853	10.0856	10.0801	6.37194	6.45737	6.32671
ENSMUSG00000038539.16	Atf5	9.13953	9.13308	9.18179	8.58602	8.54663	8.64884	8.50781	8.47245	8.5303	6.51933	6.50588	6.51774
ENSMUSG00000020044.14	Timp3	11.0198	11.031	11.0439	9.48746	9.52749	9.55393	11.2465	11.2436	11.2792	8.52776	8.57121	8.47141
ENSMUSG00000025408.16	Ddit3	8.0756	8.09336	8.09825	7.24883	7.2065	7.26756	8.35805	8.33254	8.35212	5.1486	5.17116	5.30171
ENSMUSG00000031700.12	Gpt2	8.56376	8.54824	8.56717	7.9597	7.97219	7.97279	8.65628	8.7041	8.68546	6.4682	6.47628	6.47885
ENSMUSG00000040435.13	Ppp1r15a	7.99099	7.96146	7.96338	6.67041	6.71029	6.78873	8.09518	8.12306	8.11781	5.06632	4.9987	5.16304
ENSMUSG00000026628.14	Atf3	5.85168	5.81651	5.83264	4.22579	4.22835	4.15465	6.15731	6.15108	6.21343	2.04986	1.97204	2.12209
ENSMUSG00000040010.11	Slc7a5	9.1704	9.10157	9.1353	9.00156	8.96747	9.02496	9.63453	9.68345	9.66011	6.88964	6.93637	6.84869
ENSMUSG00000058258.15	Idi1	3.68857	3.61004	3.6207	6.08182	5.92712	5.89951	3.88877	3.81167	3.87597	7.09958	7.10332	7.07262
ENSMUSG00000021831.10	Ero1a	8.6269	8.62972	8.637	7.48847	7.59583	7.62792	8.48792	8.48637	8.52235	6.28567	6.31718	6.34738
ENSMUSG00000041168.11	Lonp1	9.07089	9.03457	9.08832	8.39498	8.42455	8.45141	9.24002	9.22194	9.22496	7.25372	7.23302	7.23883
ENSMUSG00000031778.14	Cx3cl1	6.50945	6.50527	6.54505	8.16309	8.13868	8.12769	7.10455	7.12389	7.14997	8.36511	8.37883	8.37151
ENSMUSG00000035504.17	Reep6	6.53079	6.54135	6.61375	3.86874	3.85434	3.85381	6.17522	6.06549	6.1309	2.63806	2.35565	2.6759
ENSMUSG00000041481.18	Serpina3g	3.42844	3.46731	3.41988	6.27205	6.26742	6.31039	4.65238	4.55118	4.70643	6.51906	6.5574	6.6444
ENSMUSG00000006800.15	Sulf2	5.75463	5.77138	5.80691	7.9491	7.92546	8.004	6.40062	6.38068	6.43531	7.92476	7.91822	7.86424
ENSMUSG00000001228.15	Uhrf1	4.77012	4.77902	4.80058	6.75417	6.73291	6.78292	4.87095	5.01527	4.91002	7.43294	7.38318	7.31482
ENSMUSG00000026456.19	Cyb5r1	7.80832	7.74804	7.75223	7.04025	7.12352	7.17885	7.91018	7.96414	7.99743	5.29908	5.22571	5.33064
ENSMUSG00000034160.14	Ogt	9.58548	9.526	9.54963	8.53406	8.5899	8.63608	8.99147	8.99122	8.97638	7.60573	7.58033	7.51349
ENSMUSG00000068739.14	Sars	9.60725	9.60471	9.63275	8.9164	8.90611	8.94226	9.7985	9.73565	9.74449	7.92376	7.9411	7.9598
ENSMUSG00000029752.13	Asns	8.77041	8.73847	8.80376	8.28586	8.26543	8.34711	8.94388	8.96876	8.98568	6.68827	6.66849	6.79392
ENSMUSG00000028542.18	Slc6a9	7.74975	7.73889	7.76782	7.09524	7.10818	7.24026	7.87897	7.91047	7.89124	5.43365	5.52727	5.42822
ENSMUSG00000015837.16	Sqstm1	10.5715	10.6278	10.5958	9.31922	9.32255	9.2711	10.4558	10.4294	10.4541	8.97129	8.99122	8.98845
ENSMUSG00000024587.11	Nars	9.52566	9.50858	9.54866	8.96278	9.02099	9.01991	9.88233	9.86122	9.83941	7.87759	7.91696	7.93034
ENSMUSG00000093930.3	Hmgcs1	6.36284	6.33596	6.30769	7.39979	7.37837	7.36285	6.21552	6.2619	6.18225	8.19043	8.22328	8.12816
ENSMUSG00000029304.15	Spp1	6.48597	6.44144	6.40669	8.24952	8.24171	8.29203	6.85011	6.99963	6.92226	8.6144	8.65631	8.74876
ENSMUSG00000024359.11	Hspa9	10.0204	10.0929	10.0612	9.32747	9.37022	9.37958	10.2871	10.2803	10.2779	8.51661	8.52873	8.50257
ENSMUSG00000001467.6	Cyp51	6.28668	6.25374	6.32079	7.42842	7.4028	7.30949	6.7161	6.71045	6.63495	8.31246	8.37203	8.28095
ENSMUSG00000070348.6	Ccnd1	8.50044	8.5344	8.47003	9.60563	9.61059	9.59602	8.86086	8.91393	8.87749	10.1361	10.1352	10.0599
ENSMUSG00000032252.15	Glce	7.56417	7.53422	7.52464	7.00204	7.02993	7.05965	7.68746	7.66638	7.7076	5.84569	5.87618	5.7793
ENSMUSG00000036390.9	Gadd45a	8.39101	8.30046	8.41473	7.36753	7.36269	7.39124	8.13919	8.18855	8.1341	6.19126	6.16402	6.33993
ENSMUSG00000023951.19	Vegfa	8.59602	8.57768	8.51976	7.92091	7.97126	7.97337	8.33732	8.36757	8.36884	6.96145	7.00903	6.94327
ENSMUSG00000021266.17	Wars	7.55517	7.47203	7.55251	6.51514	6.53672	6.63804	7.86362	7.80291	7.84565	5.62564	5.57698	5.60852
ENSMUSG00000027832.6	Ptx3	6.88252	6.82668	6.99627	5.32768	5.40702	5.29784	7.00131	7.0936	7.08782	4.39691	4.45642	4.32128
ENSMUSG00000032291.9	Crabp1	4.4379	4.1584	4.33978	7.30915	7.23071	7.21499	5.46655	5.53806	5.4444	7.8611	7.91108	7.9975
ENSMUSG00000030772.7	Dkk3	5.65643	5.71792	5.69916	7.11949	7.14183	7.0995	5.87895	5.77219	5.77891	7.44885	7.45242	7.44271
ENSMUSG00000025268.16	Maged2	6.3668	6.43448	6.37963	7.58382	7.52265	7.57833	6.23854	6.23769	6.24839	8.0613	8.08716	8.16467
ENSMUSG00000001918.18	Slc1a5	8.19905	8.10491	8.15199	6.94998	7.03706	7.14776	7.69468	7.76564	7.72487	5.69562	5.80314	5.69893
ENSMUSG00000097745.2	AI115009	5.22069	5.0884	5.08558	2.97743	3.04903	3.09444	4.34949	4.22986	4.27014	1.29855	1.49368	1.35377
ENSMUSG00000025574.14	Tk1	3.58083	3.41452	3.54423	5.93729	5.74849	5.93327	4.32636	4.44109	4.43445	6.54396	6.4539	6.55499
ENSMUSG00000033278.11	Ptprm	6.90012	6.90101	6.87017	5.52328	5.54568	5.47924	6.73379	6.72573	6.72399	5.00948	4.96338	4.84792
ENSMUSG00000029777.11	Gars	8.96217	8.98661	8.99618	8.63484	8.6613	8.69371	9.27998	9.30775	9.30648	7.62662	7.62353	7.65287
ENSMUSG00000060036.15	Rpl3	10.3522	10.4065	10.3563	9.10697	9.17656	9.1207	9.67296	9.69936	9.7048	8.91493	8.96355	8.94999
ENSMUSG00000035455.13	Fignl1	3.02121	3.20148	3.12992	5.24401	5.30964	5.3228	3.46247	3.64407	3.52456	5.91163	5.90778	5.89421
ENSMUSG00000024493.10	Lars	8.65195	8.69916	8.69615	8.20561	8.26113	8.28896	8.57727	8.49272	8.46735	6.99187	7.02079	6.9275
ENSMUSG00000045294.12	Insig1	5.75826	5.75415	5.72627	6.44863	6.39005	6.35557	5.61353	5.65291	5.61729	7.32804	7.32886	7.31101
ENSMUSG00000031604.11	Msmo1	6.51017	6.45044	6.4722	7.31982	7.25487	7.24007	6.71109	6.76066	6.72023	7.99402	8.04036	8.05897
ENSMUSG00000034926.4	Dhcr24	4.17419	4.14311	4.31461	6.32862	6.2433	6.12288	4.63012	4.72926	4.59843	6.94126	6.94586	6.86634
ENSMUSG00000017493.13	Igfbp4	7.76709	7.69893	7.71708	6.93899	6.99109	7.05374	7.61862	7.5729	7.61907	6.00558	5.99583	6.08455
ENSMUSG00000027820.13	Mme	6.59198	6.57085	6.53725	8.64853	8.69769	8.57658	7.57098	7.5321	7.45164	8.42786	8.42374	8.32896
ENSMUSG00000022673.6	Mcm4	5.74493	5.6837	5.70462	7.06226	7.07873	7.06096	5.87198	6.02655	5.96586	7.43196	7.47568	7.49684
ENSMUSG00000025198.17	Erlin1	7.78393	7.71482	7.79993	6.79919	6.79825	6.84633	7.94251	7.96694	7.92981	6.23731	6.21542	6.28999
ENSMUSG00000018819.11	Lsp1	5.43508	5.49724	5.36162	7.51758	7.54157	7.67002	5.69027	5.83959	5.83454	7.64236	7.64154	7.65387
ENSMUSG00000059743.13	Fdps	5.45977	5.56636	5.50276	6.67769	6.63737	6.62097	5.63956	5.78125	5.7141	7.55092	7.57343	7.71316
ENSMUSG00000038644.15	Pold1	4.91892	4.86021	4.95215	6.1086	6.14407	6.12455	5.15565	5.15967	5.13345	6.70534	6.62882	6.62292
ENSMUSG00000020897.13	Aurkb	3.69363	3.58008	3.65621	5.58429	5.45809	5.54811	3.88482	4.11813	4.01841	6.29497	6.34926	6.42454
ENSMUSG00000031960.15	Aars	9.99774	9.96851	10.0198	9.78127	9.79082	9.8445	10.215	10.1991	10.2039	8.73711	8.69016	8.69387
ENSMUSG00000063873.11	Slc24a3	7.07762	7.10369	7.08828	6.03604	6.18101	6.18226	7.40409	7.3174	7.29173	5.13763	5.06003	4.99702
ENSMUSG00000028312.20	Smc2	4.82988	4.92023	4.84961	6.798	6.89102	6.90025	5.29695	5.43843	5.35399	7.03152	7.06615	6.91179
ENSMUSG00000046027.18	Stard5	6.02914	6.00306	6.01074	4.65138	4.75676	4.72539	6.24241	6.29541	6.28055	4.0745	4.15719	4.06485
ENSMUSG00000037544.15	Dlgap5	4.7581	4.68011	4.75217	6.42041	6.38198	6.55217	4.85992	5.02249	5.00624	6.90651	6.88023	6.90195
ENSMUSG00000034163.11	Zfc3h1	8.25719	8.20011	8.19671	6.98455	7.08658	7.09737	7.86975	7.93014	7.89765	6.45084	6.47286	6.31481
ENSMUSG00000035683.14	Melk	2.82784	2.77313	2.74794	4.97707	4.98282	5.08602	3.36368	3.52214	3.47601	5.39037	5.40634	5.49043
ENSMUSG00000025190.14	Got1	7.1396	6.99814	7.06559	6.19771	6.25354	6.25272	7.17968	7.28702	7.20707	5.26795	5.30673	5.26322
ENSMUSG00000020412.17	Ascc2	7.49672	7.51588	7.49798	6.252	6.33487	6.3848	7.16182	7.11548	7.09989	5.79156	5.66506	5.79079
ENSMUSG00000051220.3	Ercc6l	3.46734	3.47275	3.45487	5.49766	5.35789	5.46744	3.76089	3.89264	3.77701	5.89827	5.85794	5.79131
ENSMUSG00000108414.2	Snhg1	7.46288	7.38139	7.46368	6.26655	6.23919	6.29712	6.70073	6.76012	6.74207	5.84906	5.81895	5.92346
ENSMUSG00000044424.5	Gm9493	7.10516	7.0248	7.1049	5.44442	5.36357	5.30891	6.46426	6.49303	6.48523	5.35229	5.36264	5.43022
ENSMUSG00000026142.16	Rhbdd1	6.45764	6.40737	6.42262	5.84242	5.77289	5.82283	6.70044	6.71714	6.75456	4.48726	4.67365	4.55619
ENSMUSG00000061477.5	Rps7	9.31309	9.26697	9.3166	7.63037	7.62478	7.61935	8.75134	8.74392	8.67392	7.54859	7.53512	7.71631
ENSMUSG00000042029.8	Ncapg2	4.49838	4.3377	4.38886	6.27102	6.24262	6.28559	4.66741	4.66733	4.74565	6.56409	6.55767	6.41647
ENSMUSG00000037379.8	Spon2	2.06376	1.96649	1.84256	5.56592	5.40886	5.49742	3.40014	3.43021	3.23143	5.16695	5.14989	5.31625
ENSMUSG00000006333.15	Rps9	9.73519	9.71131	9.73634	8.58	8.54483	8.5797	9.08988	9.0779	9.05321	8.40765	8.33569	8.46008
ENSMUSG00000054136.7	Adm2	5.06261	5.00535	5.00229	4.25666	4.35927	4.17576	5.7935	5.90594	5.90704	2.29686	2.34571	2.44141
ENSMUSG00000017146.13	Brca1	3.34415	3.47003	3.35653	5.78678	5.73442	5.83819	3.53992	3.80122	3.74093	6.26375	6.21474	6.082
ENSMUSG00000030978.11	Rrm1	6.21861	6.28077	6.20395	7.39428	7.4138	7.43079	6.61175	6.7818	6.74321	7.85305	7.86255	7.88888
ENSMUSG00000021482.11	Prxl2c	6.4472	6.42011	6.43143	5.60079	5.58783	5.52868	6.15239	6.17515	6.17	4.76029	4.70412	4.83889
ENSMUSG00000027306.16	Nusap1	4.23613	4.18352	4.30824	5.79397	5.78659	5.79529	4.2984	4.48614	4.52209	6.39661	6.39124	6.4369
ENSMUSG00000069793.13	Slfn9	4.4514	4.46747	4.54451	6.19082	6.29246	6.35948	5.34018	5.47505	5.43455	6.67195	6.67446	6.55713
ENSMUSG00000025140.16	Pycr1	6.16956	6.11916	6.14937	5.91371	5.85364	6.05439	6.47383	6.5037	6.4944	3.8938	3.92987	4.06829
ENSMUSG00000023940.15	Sgo1	4.26699	4.2373	4.24134	6.02671	5.9893	5.98617	4.43577	4.64414	4.61472	6.29311	6.28893	6.36566
ENSMUSG00000048327.7	Ckap2l	4.57982	4.56374	4.53091	6.4459	6.49532	6.54688	4.92199	5.20238	5.12996	6.88698	6.84758	6.84519
ENSMUSG00000025185.15	Loxl4	6.74226	6.75474	6.81569	5.5175	5.53229	5.49419	6.90042	6.92653	6.95461	5.3735	5.34279	5.32058
ENSMUSG00000029283.18	Cdc7	3.088	3.20475	3.05207	4.8411	4.89311	4.9208	3.30868	3.40006	3.29502	5.46143	5.49221	5.4012
ENSMUSG00000097195.11	Snhg5	5.9282	6.02778	5.97603	4.46327	4.25713	4.38823	5.0351	5.18078	5.19807	3.34933	3.40617	3.49613
ENSMUSG00000025758.11	Plk4	4.86055	4.91624	4.88639	6.3632	6.38043	6.3848	5.07728	5.25615	5.27262	6.6845	6.69198	6.72423
ENSMUSG00000028708.17	Mknk1	5.93141	5.89769	5.91295	4.80737	4.75964	4.75914	5.72882	5.67139	5.68532	4.1665	4.18254	4.11726
ENSMUSG00000029371.8	Cxcl5	5.67891	5.71276	5.74524	6.71277	6.78913	6.68976	6.93237	7.03506	6.9215	7.39022	7.46409	7.54083
ENSMUSG00000024843.16	Chka	7.98004	8.0051	7.97548	7.45225	7.52814	7.58137	8.51014	8.53739	8.49232	6.62039	6.62086	6.54915
ENSMUSG00000006369.15	Fbln1	3.87591	3.76897	4.02749	6.10089	6.04144	6.17784	4.43172	4.4357	4.39872	6.09946	6.15516	6.13708
ENSMUSG00000036181.3	H1f2	5.11443	5.04153	5.03445	3.2103	3.30411	3.08073	4.40712	4.45182	4.34715	1.88238	1.51157	1.76324
ENSMUSG00000027952.17	Pmvk	2.90832	2.99749	2.82574	4.03175	3.92608	3.93225	3.51456	3.46504	3.41149	5.35288	5.46836	5.45343
ENSMUSG00000037254.19	Itih2	6.58859	6.7102	6.651	5.14698	5.24405	5.37358	6.31948	6.27063	6.3413	4.49158	4.61381	4.50634
ENSMUSG00000033491.14	Prss35	1.58687	1.23918	1.21196	4.4524	4.57493	4.55367	2.98597	2.67402	2.87152	5.05396	5.01761	5.10143
ENSMUSG00000022892.12	App	9.50828	9.49284	9.5319	9.01033	9.07019	9.0148	9.3556	9.33756	9.33148	8.41364	8.37142	8.37029
ENSMUSG00000018932.10	Map2k3	5.70417	5.72934	5.73222	6.61653	6.64853	6.68438	6.06687	6.13453	6.12872	7.07695	7.11233	7.16607
ENSMUSG00000032254.11	Kif23	5.1708	4.94101	5.07531	6.94007	6.89952	6.96348	5.28575	5.47767	5.38865	7.1927	7.1996	7.15681
ENSMUSG00000024087.5	Cyp1b1	6.46246	6.53193	6.54505	7.28161	7.25877	7.24545	6.62188	6.58664	6.65478	7.77227	7.80793	7.7797
ENSMUSG00000041313.15	Slc7a1	7.83487	7.81186	7.807	7.67469	7.71077	7.66557	8.04426	8.08437	8.05423	6.33877	6.34052	6.16385
ENSMUSG00000074129.15	Rpl13a	10.5406	10.4568	10.5507	9.11747	9.08307	9.12065	9.93247	9.90904	9.88368	9.08938	9.05419	9.19098
ENSMUSG00000052957.9	Gas1	7.28987	7.17307	7.26872	9.09551	9.04609	9.01739	7.94489	7.7698	7.78756	8.9632	8.96989	8.94725
ENSMUSG00000001119.8	Col6a1	10.2619	10.2101	10.2261	11.7449	11.7279	11.7693	10.5241	10.5561	10.5751	11.3467	11.3497	11.3338
ENSMUSG00000033813.16	Tcea1	7.86515	7.89419	7.8679	6.90684	6.90689	7.00717	7.76357	7.66192	7.68597	6.52724	6.53132	6.52651
ENSMUSG00000027996.14	Sfrp2	4.53686	4.47562	4.51026	6.84007	6.76762	6.88899	6.08852	5.92435	5.92071	6.49614	6.45361	6.59994
ENSMUSG00000021127.8	Zfp36l1	5.81445	5.92427	5.82931	6.90462	6.82961	6.82593	6.67578	6.73261	6.6957	7.24031	7.27586	7.28316
ENSMUSG00000024120.13	Lrpprc	7.36547	7.38338	7.38649	6.61896	6.584	6.66729	7.2401	7.179	7.18668	6.06402	6.00731	5.94794
ENSMUSG00000037474.14	Dtl	3.71118	3.90004	3.73661	5.69959	5.70935	5.66584	3.90837	4.22986	4.08288	6.24724	6.27229	6.2636
ENSMUSG00000001663.11	Gstt1	3.34093	3.36267	3.36575	5.34867	5.11673	5.29413	3.85684	3.87282	3.84232	5.65481	5.67253	5.78296
ENSMUSG00000024742.16	Fen1	4.73377	4.6188	4.67141	5.96091	5.94028	5.99533	4.84474	4.94962	4.95205	6.31855	6.29087	6.29477
ENSMUSG00000028884.15	Rpa2	3.48202	3.35385	3.53063	5.22498	5.21291	5.17015	3.87688	3.95993	3.96663	5.74303	5.71804	5.9125
ENSMUSG00000037851.14	Iars	8.32106	8.36712	8.36511	8.01522	8.03526	8.06347	8.5095	8.53613	8.50523	7.27876	7.28288	7.24531
ENSMUSG00000024308.16	Tapbp	7.27561	7.30808	7.28319	8.02014	7.99627	7.98296	7.8155	7.83014	7.80241	8.32749	8.31744	8.32204
ENSMUSG00000057113.14	Npm1	9.94668	10.0391	9.99566	8.75857	8.85648	8.85448	9.52906	9.48458	9.43768	8.64519	8.63223	8.69353
ENSMUSG00000027883.16	Gpsm2	4.83218	4.85709	4.90232	6.20564	6.23437	6.28072	5.09706	5.09442	5.09556	6.29897	6.27164	6.28038
ENSMUSG00000022587.15	Ly6e	8.70651	8.69028	8.70511	9.26439	9.25106	9.27327	9.63254	9.60235	9.66914	9.77321	9.78955	9.85226
ENSMUSG00000022351.15	Sqle	6.75743	6.67697	6.79051	7.36881	7.35906	7.34379	7.0181	7.07225	7.00468	8.00313	7.99188	8.04595
ENSMUSG00000053332.14	Gas5	8.33032	8.38754	8.4224	6.65417	6.67188	6.65433	7.55537	7.49401	7.46604	6.15429	6.29411	6.40835
ENSMUSG00000028614.15	Ndc1	5.15531	5.15511	5.22471	6.4173	6.4264	6.40454	5.52867	5.64942	5.66018	6.66862	6.62574	6.64468
ENSMUSG00000062991.10	Nrg1	5.59628	5.58973	5.59126	6.99019	7.05922	7.00965	6.50603	6.54811	6.52886	6.90125	6.91783	6.82653
ENSMUSG00000028811.13	Yars	7.6622	7.62322	7.67813	7.31649	7.28063	7.35112	8.12878	8.13027	8.1746	6.49238	6.52583	6.4898
ENSMUSG00000086583.4	Gm15500	9.29891	9.31962	9.35849	7.91806	7.98873	7.94196	8.71903	8.69128	8.66598	7.95713	7.99038	8.10071
ENSMUSG00000031513.9	Leprotl1	7.45658	7.45803	7.49536	6.85368	6.73096	6.85742	7.85139	7.8442	7.78175	5.75026	5.81355	5.93811
ENSMUSG00000032815.17	Fanca	4.41666	4.31514	4.26782	6.08142	6.05204	6.10817	4.414	4.53991	4.55623	6.22342	6.22664	6.1202
ENSMUSG00000027848.13	Olfml3	3.48202	3.73765	3.59479	5.49531	5.37299	5.37358	4.70936	4.7598	4.88338	5.90719	5.92081	5.96372
ENSMUSG00000082193.2	Rpl5-ps1	6.49215	6.50195	6.52906	5.12965	5.05563	5.05656	5.84832	5.78709	5.80699	5.12656	5.12468	5.16223
ENSMUSG00000058838.10	Rps27a-ps2	7.41529	7.44372	7.43512	6.06289	5.94492	5.96766	6.89084	6.82473	6.74975	5.97198	5.93331	6.00648
ENSMUSG00000050335.18	Lgals3	8.97091	8.99639	9.02308	7.38795	7.30741	7.32628	9.27441	9.28487	9.35875	7.54275	7.54533	7.68711
ENSMUSG00000020185.17	E2f7	2.80933	2.66787	2.65068	5.33755	5.26445	5.31477	2.99333	3.36076	3.25401	5.62858	5.58545	5.46195
ENSMUSG00000032221.15	Mns1	1.78934	1.74137	1.704	4.16495	4.36053	4.16281	2.34637	2.4833	2.63646	4.84288	4.84222	4.78347
ENSMUSG00000058558.13	Rpl5	9.55038	9.57709	9.59645	8.24288	8.2148	8.30185	8.98491	8.96449	9.01294	8.23763	8.29695	8.37949
ENSMUSG00000059070.17	Rpl18	9.14727	9.11197	9.1656	7.74342	7.67096	7.64825	8.54891	8.54633	8.55153	7.81004	7.76603	7.91657
ENSMUSG00000078773.12	Rad54b	2.6675	2.40283	2.34972	4.55532	4.61254	4.55986	2.89063	2.95606	2.94867	5.11541	5.11007	5.01852
ENSMUSG00000086841.2	2410006H16Rik	8.3787	8.39132	8.39394	6.73984	6.77475	6.78741	7.55257	7.51734	7.54924	6.79803	6.75037	6.9766
ENSMUSG00000022360.9	Atad2	6.89162	6.83278	6.8385	7.94038	8.00629	8.01305	6.97505	7.07247	7.1246	8.276	8.26624	8.18649
ENSMUSG00000070469.13	Adamtsl3	8.40774	8.43259	8.39816	7.55955	7.62385	7.62895	8.26189	8.26153	8.23542	7.10699	7.10479	6.94491
ENSMUSG00000044934.14	Zfp367	4.67746	4.66829	4.65896	6.0712	6.02917	6.08217	4.80764	4.92769	4.99863	6.29589	6.33802	6.2636
ENSMUSG00000026193.16	Fn1	13.5665	13.5648	13.5546	13.125	13.1593	13.1111	13.9234	13.881	13.8693	12.0733	12.0348	11.8503
ENSMUSG00000022836.12	Mylk	4.71773	4.71269	4.77311	6.05413	6.1706	6.05088	5.35239	5.42148	5.33899	6.49963	6.45158	6.34773
ENSMUSG00000025137.16	Pcyt2	5.56628	5.46686	5.52899	6.37828	6.24193	6.35912	6.05329	6.01304	6.11028	6.98461	6.98941	7.01676
ENSMUSG00000074578.15	Zfas1	7.5714	7.59821	7.60034	5.87444	5.82554	5.95598	6.47481	6.4995	6.42646	5.96112	6.06108	6.14728
ENSMUSG00000020122.17	Egfr	3.5616	3.65624	3.56307	5.40675	5.46985	5.42535	3.97496	3.91413	3.92101	5.38167	5.37552	5.32921
ENSMUSG00000037211.13	Spry1	5.19328	5.07861	5.2	6.46254	6.35021	6.42027	6.31104	6.30727	6.2707	6.57253	6.62984	6.61853
ENSMUSG00000058625.7	Gm17383	5.57247	5.52895	5.56614	6.70923	6.66294	6.70994	5.74308	5.93491	5.86576	7.05268	6.99737	7.07091
ENSMUSG00000075602.11	Ly6a	7.08293	7.02549	7.08247	7.29907	7.2843	7.19842	7.55474	7.59136	7.66175	8.36106	8.39616	8.47927
ENSMUSG00000030498.16	Gas2	6.09701	5.92972	6.04224	7.75882	7.80288	7.76576	6.4892	6.55248	6.50351	7.36764	7.45184	7.44685
ENSMUSG00000038975.15	Rabggtb	6.45802	6.41481	6.37508	5.38723	5.40335	5.45155	5.76959	5.77326	5.76438	5.12239	5.05394	5.07773
ENSMUSG00000022884.17	Eif4a2	8.72884	8.74854	8.71627	8.26582	8.29076	8.25302	8.32479	8.3035	8.28402	7.78695	7.79223	7.76719
ENSMUSG00000025289.16	Prdx4	5.57315	5.53807	5.45603	6.68131	6.70682	6.68013	5.95915	5.92435	5.95212	6.95462	6.9035	7.06274
ENSMUSG00000001473.8	Tubb6	5.99269	5.87936	5.92807	7.38049	7.3589	7.3648	6.67062	6.85206	6.84682	7.46857	7.48165	7.56095
ENSMUSG00000032193.10	Ldlr	6.13838	6.07911	6.08009	6.99228	6.95975	6.94775	6.22883	6.2676	6.26118	7.64103	7.61074	7.44965
ENSMUSG00000029910.15	Mad2l1	5.33914	5.19024	5.24651	6.5067	6.54313	6.631	5.46523	5.60866	5.57309	6.84499	6.83852	6.86905
ENSMUSG00000020241.14	Col6a2	9.02644	8.95893	8.96605	10.4042	10.3952	10.4433	9.48384	9.57114	9.56421	10.1132	10.1224	10.0641
ENSMUSG00000010755.18	Cars	7.78689	7.80338	7.78368	7.64463	7.68351	7.73723	8.12418	8.09446	8.10966	6.69086	6.73236	6.74264
ENSMUSG00000056917.14	Sipa1	5.12663	5.05883	5.11049	6.32333	6.16121	6.23349	5.34953	5.25615	5.24713	6.67765	6.61776	6.70033
ENSMUSG00000030346.17	Rad51ap1	3.46734	3.36853	3.42283	5.3441	5.26715	5.33006	3.67652	4.02603	3.95683	5.79156	5.88178	5.80838
ENSMUSG00000032218.8	Ccnb2	4.10946	3.91812	3.96616	6.10706	6.11778	6.17985	4.10807	4.28938	4.36652	6.1406	6.09448	6.2283
ENSMUSG00000022945.13	Chaf1b	3.66303	3.71715	3.68842	4.96268	5.01688	5.04953	4.04394	4.1029	4.20377	5.58933	5.51512	5.63311
ENSMUSG00000085396.8	Firre	7.10753	7.01829	7.09176	6.28674	6.28316	6.3736	6.83047	6.8193	6.79636	5.65914	5.7137	5.55314
ENSMUSG00000020808.4	Pimreg	3.47323	3.30279	3.35344	5.54049	5.48267	5.64387	3.48353	3.8446	3.77255	6.21822	6.20446	6.26585
ENSMUSG00000040848.12	Sft2d2	6.35728	6.45113	6.4525	5.50294	5.58999	5.51918	6.09708	6.08155	6.09562	4.96359	4.95278	4.82676
ENSMUSG00000031461.5	Myom2	4.19751	4.36138	4.07513	1.85857	1.7358	1.90887	6.13917	6.00532	6.05212	1.33745	1.29102	1.48308
ENSMUSG00000042489.16	Clspn	3.21649	3.10308	3.18999	5.35257	5.35599	5.5109	3.35799	3.70363	3.60454	5.8942	5.89207	5.77351
ENSMUSG00000037563.16	Rps16	8.61087	8.52853	8.61967	7.34109	7.32984	7.3232	7.95175	7.97324	7.97261	7.41103	7.39468	7.50495
ENSMUSG00000021811.8	Dnajc9	4.63736	4.58275	4.69965	5.82894	5.7266	5.83411	4.88981	5.03681	4.93219	6.26469	6.24848	6.26135
ENSMUSG00000011257.20	Pabpc4	7.93205	7.9487	7.94952	7.01339	7.11643	7.02785	7.40633	7.3828	7.46137	6.80456	6.7295	6.7814
ENSMUSG00000028551.15	Cdkn2c	4.98226	5.07503	5.03445	6.36964	6.42791	6.56607	5.37159	5.34154	5.34125	6.60552	6.55982	6.62438
ENSMUSG00000061353.12	Cxcl12	9.96548	9.93265	9.98501	11.1383	11.1089	11.1792	10.7559	10.6364	10.6554	11.1035	11.1072	11.0798
ENSMUSG00000037742.15	Eef1a1	13.2468	13.3026	13.3006	12.2343	12.207	12.2127	12.5191	12.4719	12.5015	12.2041	12.23	12.2732
ENSMUSG00000025068.9	Gsto1	8.57297	8.57563	8.59709	7.51483	7.49127	7.47239	8.46145	8.43973	8.51202	7.4687	7.47582	7.56917
ENSMUSG00000040339.11	Fam102b	5.6057	5.67369	5.58863	7.069	7.05004	7.06836	5.40302	5.52034	5.46113	6.87277	6.90857	6.83513
ENSMUSG00000030641.11	Ddias	1.6713	1.77702	1.68448	3.81695	3.98134	4.08597	2.69683	2.71912	2.66562	4.55175	4.44831	4.54635
ENSMUSG00000028036.7	Ptgfr	3.36331	3.1683	3.1263	5.00296	5.07192	5.01751	4.16785	4.29683	4.07384	5.57057	5.68737	5.49746
ENSMUSG00000042613.10	Pbxip1	7.48783	7.45614	7.4136	7.13033	7.07354	7.11702	7.22063	7.19764	7.18794	6.40579	6.41699	6.38026
ENSMUSG00000046591.11	Ticrr	3.42541	3.54173	3.45487	4.95243	5.02965	5.07914	3.62769	3.80122	3.7156	5.47021	5.40335	5.37783
ENSMUSG00000032399.9	Rpl4	11.2623	11.2645	11.2924	10.2024	10.1933	10.2227	10.8295	10.8056	10.7828	10.2872	10.2869	10.3557
ENSMUSG00000059142.17	Zfp945	6.009	6.06115	6.05702	5.03083	5.25836	5.2807	5.58091	5.53365	5.5308	4.10723	4.0992	3.9521
ENSMUSG00000038900.18	Rpl12	9.58701	9.56901	9.63962	8.28271	8.45134	8.39246	9.08089	9.14424	9.14752	8.24772	8.21656	8.32931
ENSMUSG00000000628.11	Hk2	6.47647	6.47507	6.36744	5.6106	5.71479	5.68295	6.76127	6.77461	6.8233	5.12656	5.07214	5.06316
ENSMUSG00000050410.16	Tcf19	3.5365	3.39458	3.61813	5.49766	5.40886	5.47466	3.75007	3.80332	3.90683	5.63592	5.70157	5.8594
ENSMUSG00000052353.14	Cemip	3.40706	3.5103	3.43457	5.92292	6.0224	5.87191	5.10132	5.15475	5.02512	5.66823	5.6204	5.43489
ENSMUSG00000096210.3	H1f0	8.27184	8.28748	8.27283	7.53729	7.52828	7.43231	7.55521	7.5804	7.64385	7.1474	7.19839	7.14077
ENSMUSG00000041453.13	Rpl21	6.88556	6.96713	6.94206	5.71887	5.70438	5.76024	6.33332	6.36693	6.34619	5.65626	5.66756	5.77299
ENSMUSG00000009585.19	Apobec3	4.65172	4.77242	4.72017	5.40174	5.37737	5.37358	5.07641	5.07286	5.18555	6.24788	6.18613	6.30026
ENSMUSG00000004655.6	Aqp1	5.14427	5.00441	5.04788	7.7026	7.67147	7.45755	5.56061	5.68566	5.64318	7.73223	7.72336	7.70005
ENSMUSG00000030254.17	Rad18	3.93687	3.99393	3.81725	5.67331	5.72071	5.83666	4.37648	4.55492	4.51677	5.87739	5.88651	5.82474
ENSMUSG00000107176.2	Gm9794	8.33367	8.26578	8.40181	7.069	6.99354	6.99122	7.73311	7.73893	7.74137	7.00533	7.05361	7.14138
ENSMUSG00000053907.11	Mat2a	8.51996	8.48279	8.52269	7.8945	7.86207	7.9863	8.21455	8.21112	8.19942	7.36146	7.38151	7.4513
ENSMUSG00000021025.9	Nfkbia	5.38908	5.33181	5.30441	6.5134	6.36729	6.37465	5.63074	5.72267	5.61106	6.81256	6.78458	6.88254
ENSMUSG00000027323.11	Rad51	3.60518	3.44254	3.46349	5.31972	5.39967	5.46876	3.99893	4.31897	4.16175	5.74031	5.74713	5.7793
ENSMUSG00000057751.15	Megf6	2.92131	2.77754	2.89107	6.25721	6.18992	5.9475	3.84874	4.0474	3.97442	5.97198	5.95432	5.86188
ENSMUSG00000032018.15	Sc5d	5.98806	5.95863	5.97754	6.44376	6.41185	6.43145	5.81236	5.77646	5.77836	7.06577	7.11123	7.01431
ENSMUSG00000017929.14	B4galt5	5.51793	5.57777	5.48735	6.31435	6.32842	6.29601	6.08637	6.14241	6.13351	6.8736	6.82271	6.73265
ENSMUSG00000082809.4	Gm14150	5.81735	5.77193	5.91452	6.91412	6.84437	6.93614	6.02932	6.14984	6.11204	7.23934	7.16451	7.25194
ENSMUSG00000021806.5	Nid2	8.17474	8.14649	8.15177	9.08524	9.10726	9.05232	8.85802	8.85214	8.84021	9.12621	9.11577	9.04655
ENSMUSG00000060419.9	Rps16-ps2	8.65811	8.60335	8.68245	7.39254	7.4351	7.36409	7.96702	7.96706	7.97698	7.35688	7.40099	7.52574
ENSMUSG00000036534.7	Slc38a7	6.85373	6.83832	6.85715	6.27617	6.28016	6.34665	7.31656	7.21683	7.34358	5.6687	5.63016	5.67149
ENSMUSG00000020964.15	Sel1l	7.65736	7.61139	7.65637	7.20021	7.20755	7.20811	7.85808	7.81321	7.87559	6.63924	6.65522	6.57053
ENSMUSG00000067931.7	Zfp948	4.79738	4.85709	4.7892	5.72941	5.82326	5.83717	5.26614	5.29911	5.30464	6.12366	6.1387	6.17984
ENSMUSG00000052572.20	Dlg2	5.97826	5.96009	5.94919	4.64503	4.54301	4.60486	5.7792	5.68679	5.63706	4.47531	4.4249	4.39023
ENSMUSG00000024164.16	C3	5.26806	5.26276	5.27942	6.84677	6.7595	6.82875	6.44693	6.43845	6.449	6.57431	6.55632	6.44188
ENSMUSG00000040111.18	Gramd1b	4.44392	4.58652	4.45228	2.62841	2.66316	2.82522	3.2698	3.26972	3.28566	1.47466	1.46641	1.08163
ENSMUSG00000004319.16	Clcn3	6.20363	6.22942	6.28801	5.73341	5.7605	5.74782	6.55939	6.64565	6.58654	5.00345	4.94292	4.87861
ENSMUSG00000058672.8	Tubb2a	4.86167	5.01004	5.08279	6.14581	6.02878	6.07225	5.57111	5.56734	5.47972	6.61669	6.57665	6.69394
ENSMUSG00000041859.11	Mcm3	5.97878	5.79493	5.95684	7.21422	7.17057	7.20001	6.29809	6.48848	6.37773	7.49529	7.47326	7.47384
ENSMUSG00000027677.18	Ttc14	7.57569	7.5783	7.54441	6.84654	6.94066	6.97395	7.23526	7.10914	7.13745	6.19854	6.30601	6.18974
ENSMUSG00000038685.19	Rtel1	4.20815	4.15162	4.24134	5.61386	5.57592	5.65489	4.414	4.51071	4.46242	5.73577	5.73718	5.66866
ENSMUSG00000020137.6	Thap2	6.5055	6.57021	6.45646	5.84334	5.88646	5.89706	6.06075	6.04039	6.02706	5.30216	5.34466	5.28333
ENSMUSG00000021965.4	Ska3	3.19526	3.1582	3.15141	4.88756	4.75195	4.90046	3.33209	3.69688	3.54301	5.43028	5.45281	5.48272
ENSMUSG00000037266.19	Rsrp1	8.98722	8.90406	8.98874	8.18851	8.14969	8.20466	7.82481	7.77901	7.80295	7.94014	7.99913	7.98185
ENSMUSG00000028234.7	Rps20	9.50913	9.3984	9.48467	8.26901	8.26628	8.19972	9.03051	9.06862	8.996	8.18002	8.18763	8.31961
ENSMUSG00000086290.10	Snhg12	6.82436	6.71423	6.81485	5.42045	5.41313	5.5312	5.84273	5.90057	5.79934	5.09143	4.92384	5.15497
ENSMUSG00000082035.2	Rpl17-ps8	7.24258	7.27145	7.27832	6.03766	5.95833	5.99075	6.58885	6.54999	6.55799	6.13923	6.09819	6.21401
ENSMUSG00000023953.10	Polh	4.44241	4.47291	4.45228	5.5175	5.51367	5.4375	4.58088	4.70817	4.6769	5.9654	5.91241	5.90675
ENSMUSG00000022797.17	Tfrc	4.185	4.119	4.24967	6.00827	6.00514	5.89167	4.95724	4.9628	5.05573	5.81673	5.78026	5.73292
ENSMUSG00000026915.17	Strbp	7.13519	7.16867	7.06959	6.22883	6.28716	6.27434	7.0045	6.97056	6.97756	6.08239	6.04849	6.06747
ENSMUSG00000047757.18	Fancb	1.96687	2.12013	2.15779	4.03823	4.09805	4.00844	2.68323	2.8667	2.68474	4.4991	4.5241	4.48592
ENSMUSG00000071415.7	Rpl23	9.52282	9.49648	9.52972	8.24594	8.23027	8.27416	9.04951	8.96893	8.94396	8.21414	8.23114	8.38726
ENSMUSG00000010095.14	Slc3a2	9.15364	9.10612	9.13502	9.00083	8.97037	9.00972	9.48163	9.51455	9.54734	8.15709	8.17935	8.23807
ENSMUSG00000028108.17	Ecm1	7.02545	7.00403	6.98084	8.18423	8.13343	8.07151	7.35814	7.4945	7.48304	8.16691	8.15242	8.19644
ENSMUSG00000081137.4	BC022960	1.93307	2.03435	2.07774	4.13807	4.21444	4.245	2.70133	2.68316	2.69891	4.30789	4.28754	4.23822
ENSMUSG00000052146.17	Rps10	9.11989	9.07854	9.16036	7.85251	7.78417	7.78068	8.48433	8.46394	8.43728	7.91384	7.85019	8.02364
ENSMUSG00000037313.17	Tacc3	4.72392	4.69299	4.58456	6.47184	6.45064	6.53499	4.85791	5.09698	5.15845	6.86572	6.83164	6.84444
ENSMUSG00000037466.14	Tedc1	2.00804	2.05628	2.18583	4.62688	4.51718	4.52738	2.37483	2.62273	2.34953	4.58142	4.67563	4.55373
ENSMUSG00000028149.13	Rap1gds1	7.65526	7.69734	7.67396	6.86851	6.91723	6.95035	7.45995	7.47261	7.44149	6.68639	6.63266	6.71137
ENSMUSG00000022090.11	Pdlim2	5.26041	5.20586	5.34072	6.54016	6.54341	6.56822	5.63251	5.49203	5.45557	6.67978	6.65043	6.74022
ENSMUSG00000028702.16	Rad54l	2.12492	1.93528	2.16485	4.43656	4.40408	4.53745	2.62281	2.9371	2.49741	5.03115	5.06534	4.92961
ENSMUSG00000031490.7	Eif4ebp1	8.26676	8.17632	8.23192	8.04366	8.01022	8.0423	8.54508	8.58361	8.57357	6.93275	6.99558	7.12041
ENSMUSG00000114547.2	Gm3226	5.38518	5.26903	5.38221	6.43428	6.38198	6.42435	5.48495	5.60025	5.60981	6.7116	6.7283	6.84869
ENSMUSG00000024883.9	Rin1	7.60466	7.57261	7.56039	7.18516	7.20966	7.26377	7.85037	7.87741	7.87273	6.60453	6.6206	6.54237
ENSMUSG00000026385.17	Dbi	4.73622	4.75688	4.79148	5.79158	5.83739	5.77681	5.07555	5.15475	5.12909	6.10722	6.15516	6.27146
ENSMUSG00000051278.13	Zgrf1	3.4525	3.5261	3.44621	4.91509	5.004	5.08	3.69018	3.83029	3.69453	5.45592	5.42829	5.29586
ENSMUSG00000035439.14	Haus8	3.15917	2.93574	3.00169	4.66922	4.70994	4.74617	3.13652	3.43021	3.40574	5.30093	5.21823	5.28629
ENSMUSG00000048368.10	Omd	2.16187	2.00458	2.27337	4.94985	4.93612	4.84882	2.57455	2.55967	2.51888	4.3946	4.57072	4.59008
ENSMUSG00000024276.8	Zfp397	6.2971	6.35599	6.28396	5.79014	5.8228	5.82231	5.87248	5.82317	5.78446	5.07065	5.15132	5.12804
ENSMUSG00000041560.13	Nop53	7.22937	7.25258	7.30932	6.24291	6.25354	6.18866	6.75316	6.72545	6.78062	6.2094	6.16932	6.24397
ENSMUSG00000029208.17	Guf1	6.74287	6.70442	6.7675	6.31968	6.34448	6.43819	6.37126	6.25426	6.35068	5.4724	5.52617	5.47496
ENSMUSG00000036882.8	Arhgap33	5.57521	5.4757	5.55879	4.6765	4.69499	4.87189	6.03824	6.10212	6.17761	3.75521	3.77366	3.80936
ENSMUSG00000020075.9	Ddx21	8.28551	8.34177	8.33871	7.98202	8.06066	8.06434	8.50048	8.54367	8.53376	7.38137	7.38849	7.34384
ENSMUSG00000052684.5	Jun	6.07441	6.03378	6.14402	7.51367	7.46551	7.45755	6.62425	6.68425	6.66895	7.12725	7.15636	7.13278
ENSMUSG00000005470.9	Asf1b	3.58627	3.56231	3.4491	5.03812	4.98692	5.04071	3.06844	3.3262	3.12348	5.37701	5.40514	5.44617
ENSMUSG00000019970.16	Sgk1	7.293	7.32059	7.3228	8.13674	8.14905	8.09258	7.8848	7.96788	7.87611	8.25281	8.25624	8.29358
ENSMUSG00000042675.16	Ypel3	6.4569	6.39057	6.41338	5.66025	5.64236	5.70323	6.02079	5.85331	5.99295	4.85968	4.95931	5.02296
ENSMUSG00000082536.2	Gm13456	10.0053	9.99071	10.1164	8.89449	8.95005	8.95576	9.19802	9.17507	9.25704	8.93543	8.88663	8.9734
ENSMUSG00000074934.4	Grem1	6.47353	6.50925	6.47363	7.34403	7.45564	7.56992	8.00598	8.05433	8.03131	7.80398	7.85458	7.78363
ENSMUSG00000028967.11	Errfi1	5.16444	5.06875	5.1475	6.9698	7.02476	7.06944	5.53625	5.52986	5.56021	6.29218	6.38458	6.3813
ENSMUSG00000030116.15	Mfap5	5.06652	4.98454	4.97141	6.76495	6.72239	6.63365	5.65763	5.81696	5.78113	6.41065	6.4831	6.51868
ENSMUSG00000024608.12	Rps14	9.28249	9.28168	9.32667	8.05688	8.07198	8.06042	8.73442	8.76565	8.80289	8.2831	8.27731	8.38803
ENSMUSG00000002831.15	Plin4	6.10557	6.25255	6.07868	4.73945	4.73354	4.77731	5.21825	5.07026	5.14902	4.52039	4.58558	4.54882
ENSMUSG00000029231.16	Pdgfra	3.275	3.18498	3.10076	5.14474	5.16236	4.93515	3.55741	3.82204	3.5741	5.77438	5.77517	5.64755
ENSMUSG00000031453.17	Rasa3	6.37862	6.34044	6.33338	6.9858	7.0049	6.98962	6.72801	6.71519	6.70275	7.34425	7.35419	7.26829
ENSMUSG00000097415.3	AU020206	4.5716	4.60275	4.60027	5.39229	5.3686	5.39104	4.86294	4.88677	4.81886	5.84822	5.85137	5.87862
ENSMUSG00000031770.17	Herpud1	8.03348	7.95357	8.09398	7.70324	7.66304	7.66744	8.22992	8.15766	8.20119	6.90934	6.92389	6.98504
ENSMUSG00000007888.16	Crlf1	5.6859	5.56954	5.7022	7.65639	7.60878	7.58593	5.80975	5.86239	5.90755	6.84372	6.86399	6.93553
ENSMUSG00000034480.19	Diaph2	5.794	5.88243	5.73341	4.87676	4.87995	4.83867	5.64015	5.63596	5.61916	4.29436	4.34481	4.18219
ENSMUSG00000030029.15	Lrig1	4.72144	4.63346	4.75802	6.08142	6.00393	5.97045	5.18407	5.33793	5.29145	6.33336	6.27098	6.17626
ENSMUSG00000029363.15	Rfc5	3.70619	3.836	3.90632	5.4291	5.51764	5.58742	4.18081	4.24843	4.38855	5.72205	5.7348	5.85741
ENSMUSG00000030528.13	Blm	4.0177	4.03683	4.07325	5.58816	5.63507	5.53811	4.27291	4.48353	4.54189	5.90152	5.96084	5.80529
ENSMUSG00000016494.10	Cd34	5.66803	5.60468	5.59845	6.57565	6.58319	6.59137	6.066	6.10297	6.16065	6.68992	6.66874	6.73833
ENSMUSG00000026196.8	Bard1	2.45172	2.29014	2.49689	4.48477	4.57166	4.55739	2.5647	2.94851	2.73604	4.95502	4.94457	4.82371
ENSMUSG00000025579.15	Gaa	8.54736	8.50721	8.5333	7.99622	7.99005	7.9966	8.20665	8.17698	8.16814	7.74076	7.70148	7.71164
ENSMUSG00000026430.17	Rassf5	4.90154	4.71958	4.75685	3.59335	3.5849	3.69191	4.56738	4.57713	4.57812	2.83443	2.87432	2.69382
ENSMUSG00000025586.18	Cpeb1	5.48696	5.42885	5.41071	4.53142	4.46056	4.56233	5.06859	5.02608	5.11771	4.00068	3.93651	3.95952
ENSMUSG00000032113.17	Chek1	3.74567	3.53394	3.5974	4.94641	4.91564	5.04513	4.01891	4.07368	4.00516	5.33196	5.39554	5.35196
ENSMUSG00000026785.15	Pkn3	3.22	3.25302	3.3285	4.45845	4.34402	4.39101	2.87875	3.08224	3.04798	5.08287	5.13842	5.13871
ENSMUSG00000036278.8	Macrod1	5.32943	5.4757	5.42181	3.07828	3.10439	3.19012	4.40988	4.44646	4.51677	3.37059	3.29949	3.5732
ENSMUSG00000030738.12	Eif3c	9.27339	9.29984	9.33843	9.08162	9.11744	9.13983	9.54339	9.53361	9.53657	8.47032	8.44652	8.4845
ENSMUSG00000026072.13	Il1r1	3.95803	3.88174	3.9499	5.65025	5.68686	5.63393	4.29542	4.38483	4.35463	5.40131	5.32139	5.34418
ENSMUSG00000021260.9	Hhipl1	4.61088	4.47969	4.50053	3.16072	3.26145	3.17729	3.92579	3.92764	3.96272	2.37373	2.24768	2.09537
ENSMUSG00000063328.7	Gm9396	6.52301	6.42538	6.55617	5.3796	5.33106	5.30228	6.04976	6.10892	6.07403	5.1084	5.06231	5.23289
ENSMUSG00000025395.15	Prim1	5.16808	5.31826	5.22556	6.51659	6.50878	6.66039	5.33512	5.49787	5.45974	6.71137	6.75976	6.78245
ENSMUSG00000038418.8	Egr1	6.73001	6.81037	6.90696	8.40456	8.42704	8.44365	7.15753	7.10426	7.0981	7.92655	7.91392	7.88706
ENSMUSG00000060739.9	Nsa2	7.65946	7.78763	7.70168	6.6795	6.72705	6.72544	7.22435	7.18182	7.23389	6.56179	6.6347	6.66839
ENSMUSG00000034349.15	Smc4	7.29674	7.31511	7.28704	8.06135	8.12602	8.19207	7.39178	7.51829	7.49561	8.42115	8.4558	8.3729
ENSMUSG00000030337.17	Vamp1	5.23115	5.26747	5.15461	4.10144	4.22973	4.24807	4.54751	4.56853	4.69233	3.06054	3.17869	2.82566
ENSMUSG00000019214.15	Chtf18	3.40089	3.16494	3.2642	5.41299	5.45395	5.57769	3.63476	3.98415	3.91697	5.88725	5.93497	5.89905
ENSMUSG00000018446.9	C1qbp	7.83616	7.83054	7.8768	7.04629	7.02874	7.0651	8.01754	7.99116	8.01524	6.8414	6.75671	6.9058
ENSMUSG00000043091.10	Tuba1c	7.64746	7.59166	7.66418	8.74694	8.6579	8.7861	7.83765	7.98275	7.98483	8.97635	8.91201	9.01571
ENSMUSG00000024791.11	Cdca5	2.65719	2.57978	2.59426	4.30042	4.34018	4.32858	2.68323	3.19188	2.86315	5.18839	5.21891	5.25268
ENSMUSG00000024165.10	Jpt2	6.05097	6.07105	6.08754	7.07728	7.0339	7.04627	6.21276	6.31243	6.2528	7.02353	7.06407	7.07134
ENSMUSG00000022033.10	Pbk	3.46734	3.37144	3.40207	5.20065	5.22198	5.29265	3.47567	3.88672	3.73865	5.65626	5.66156	5.75389
ENSMUSG00000067586.5	S1pr3	2.46361	2.54918	2.6557	4.42425	4.54523	4.62978	3.66735	3.50936	3.48148	4.77365	4.68749	4.80218
ENSMUSG00000051379.13	Flrt3	6.13606	6.10257	6.06884	6.8049	6.85337	6.76133	6.98732	7.06746	7.03828	7.09586	7.12364	7.13913
ENSMUSG00000022391.17	Rangap1	6.69041	6.71538	6.65352	7.72923	7.68704	7.75461	6.86624	7.05014	7.02709	7.98668	7.96463	7.87496
ENSMUSG00000027750.17	Postn	10.9114	10.863	10.878	11.6186	11.6606	11.5851	11.3614	11.384	11.3705	11.7411	11.7822	11.7328
ENSMUSG00000030867.8	Plk1	4.34617	4.31514	4.54044	5.90222	5.80713	5.91504	4.55499	4.76519	4.77159	6.27913	6.2371	6.24016
ENSMUSG00000083716.5	Gm13436	6.88997	6.837	6.8948	5.45837	5.44147	5.42806	6.23234	6.25885	6.32844	5.43925	5.49615	5.66014
ENSMUSG00000027122.16	Arl14ep	6.92639	6.8776	6.91116	6.49733	6.57123	6.57435	7.1835	7.07008	7.13658	5.83596	5.82746	5.87666
ENSMUSG00000018398.19	Septin8	7.94827	7.96376	7.90316	7.18406	7.21718	7.19525	7.78811	7.79371	7.76191	6.94304	6.93492	6.79496
ENSMUSG00000068396.10	Rpl34-ps1	7.74428	7.67669	7.74046	6.52439	6.4258	6.44121	7.17037	7.20102	7.1394	6.48075	6.44607	6.61912
ENSMUSG00000022283.16	Pabpc1	11.3418	11.4164	11.3899	10.5241	10.5503	10.5873	10.7912	10.7781	10.7959	10.527	10.4873	10.5379
ENSMUSG00000004642.14	Slbp	5.14612	5.09988	5.06025	6.14506	6.15612	6.04162	5.21037	5.3981	5.32077	6.43159	6.47201	6.49811
ENSMUSG00000069682.7	Gm10275	9.19696	9.132	9.22666	7.95991	7.94728	8.02092	8.74625	8.77615	8.71772	7.77681	7.7359	7.93941
ENSMUSG00000018362.15	Kpna2	6.42153	6.2632	6.42298	7.35559	7.37993	7.34612	6.45695	6.56179	6.57281	7.58023	7.58799	7.67278
ENSMUSG00000107383.2	Gm4366	8.19861	8.17402	8.18862	7.16643	7.18026	7.18967	7.72263	7.74276	7.71996	7.15048	7.13397	7.28316
ENSMUSG00000039081.11	Zfp503	5.00481	5.03142	5.09763	6.17512	6.10878	6.16652	4.94591	4.79287	4.88854	6.34654	6.27065	6.30282
ENSMUSG00000095159.3	Tubb4b-ps1	2.95538	2.79503	2.97783	4.50361	4.38806	4.57583	3.20152	3.31155	3.30741	4.83185	4.89174	4.92107
ENSMUSG00000039187.17	Fanci	1.58687	1.57919	1.97702	4.36752	4.23388	4.35302	2.43013	2.35775	2.55049	4.47204	4.50636	4.39298
ENSMUSG00000032289.16	Thsd4	4.25848	4.2357	4.26453	1.90182	1.97898	2.12465	3.73038	3.95805	3.77701	1.39391	1.40071	0.997539
ENSMUSG00000041921.17	Metap1d	5.98033	5.89769	5.96343	5.2517	5.23029	5.16772	5.4973	5.3701	5.51886	4.59954	4.51304	4.53397
ENSMUSG00000037071.4	Scd1	6.52052	6.56703	6.4525	6.94093	6.93155	6.89218	6.2884	6.25732	6.31815	7.66512	7.59614	7.53555
ENSMUSG00000061186.16	Sfmbt2	5.22941	5.21563	5.24734	3.95683	4.17045	4.10303	4.99715	5.09613	5.01004	3.55932	3.6336	3.5586
ENSMUSG00000069910.3	Spdl1	3.00096	2.88763	3.13352	4.69711	4.62416	4.6761	3.19834	3.41109	3.25401	4.93534	5.02386	4.97246
ENSMUSG00000117804.2	Gm6252	5.4782	5.28923	5.50415	3.798	3.69318	3.72754	4.89572	4.92673	4.87508	3.74078	3.6719	3.77189
ENSMUSG00000071644.11	Eef1g	9.69852	9.78532	9.73103	8.66477	8.6792	8.76308	9.22719	9.27259	9.27918	8.73557	8.69897	8.80157
ENSMUSG00000090877.4	Hspa1b	4.77728	4.73552	4.68376	5.79493	5.70836	5.68239	4.4836	4.49524	4.49527	6.03658	5.96369	6.02607
ENSMUSG00000043067.16	Dpy19l1	5.45457	5.40484	5.47106	6.49292	6.46422	6.42095	5.67204	5.78603	5.72799	6.53039	6.49692	6.53182
ENSMUSG00000000693.11	Loxl3	6.15451	6.02732	6.06648	6.69316	6.65266	6.61058	6.36666	6.48717	6.45109	7.18071	7.21214	7.21498
ENSMUSG00000020592.15	Sdc1	6.2871	6.29082	6.23825	7.23481	7.23296	7.20614	6.51117	6.62269	6.63925	7.29151	7.25626	7.29917
ENSMUSG00000062006.13	Rpl34	7.99637	7.90632	8.03835	6.73312	6.76333	6.67329	7.44644	7.43272	7.35295	6.71206	6.73855	6.85841
ENSMUSG00000025980.15	Hspd1	8.66061	8.77323	8.68499	8.05408	8.11623	8.11019	8.54139	8.54555	8.53582	7.83	7.80181	7.79236
ENSMUSG00000039579.16	Grin3a	1.085	1.49606	1.63448	4.3816	4.42959	4.53369	0.696051	1.03247	0.878102	4.41407	4.42135	4.35968
ENSMUSG00000051367.9	Six1	5.62369	5.55742	5.56213	6.66074	6.59075	6.6807	5.49665	5.39324	5.40532	6.69951	6.66899	6.7595
ENSMUSG00000001300.17	Efnb2	6.37194	6.40701	6.39248	7.36737	7.4179	7.41363	6.67406	6.66911	6.68832	7.41458	7.42184	7.29917
ENSMUSG00000085208.4	Brip1os	5.36393	5.54455	5.4732	6.54159	6.50307	6.50867	5.70324	5.68793	5.74288	6.59778	6.68436	6.67291
ENSMUSG00000031971.16	Ccsap	1.81741	1.91141	1.96089	3.98392	3.89502	3.96806	2.19497	2.44623	2.54003	4.41521	4.30175	4.44152
ENSMUSG00000026317.8	Cln8	7.16371	7.29142	7.23599	6.46465	6.54202	6.54999	7.98882	7.97184	7.94339	6.16919	6.19411	6.23596
ENSMUSG00000032637.16	Atxn2l	8.83102	8.73685	8.80015	8.58713	8.58869	8.6393	8.48057	8.52522	8.55786	7.90789	7.92042	7.92359
ENSMUSG00000037805.16	Rpl10a	9.66091	9.59963	9.65808	8.62996	8.54615	8.60775	9.34188	9.37508	9.406	8.60987	8.61461	8.73036
ENSMUSG00000023809.11	Rps6ka2	6.43556	6.42889	6.45178	6.16554	6.25184	6.24314	6.62455	6.65293	6.66083	5.14107	5.13338	4.8971
ENSMUSG00000041390.19	Mdfic	6.83641	6.87606	6.86367	6.5102	6.52606	6.4499	7.08185	6.95391	6.99849	5.80637	5.85706	5.80889
ENSMUSG00000081603.2	Gm14681	6.40159	6.51058	6.38796	5.19196	5.38794	5.36017	5.92395	5.95531	5.89837	5.11471	5.04782	5.05624
ENSMUSG00000093904.3	Tomm20	8.03672	8.00627	8.08645	7.34534	7.33242	7.33587	7.73215	7.72739	7.71328	7.16829	7.18852	7.24131
ENSMUSG00000021835.16	Bmp4	4.16875	4.13455	4.08819	5.01614	5.01448	5.02737	4.91426	4.95151	4.95402	5.46693	5.44235	5.5865
ENSMUSG00000051855.16	Mest	0.17074	0.224831	0.412744	3.45015	3.51853	3.28881	1.90609	1.55442	1.64557	3.50268	3.59005	3.63015
ENSMUSG00000025283.16	Sat1	7.52518	7.51884	7.49868	6.57398	6.5685	6.58471	7.35636	7.27707	7.30588	6.49184	6.52995	6.62175
ENSMUSG00000021707.6	Dhfr	4.14311	4.13626	4.24634	5.52155	5.63036	5.67727	4.60029	4.74788	4.8167	5.75475	5.85312	5.85592
ENSMUSG00000030744.14	Rps3	9.82852	9.74573	9.82392	8.5183	8.47916	8.49906	9.30237	9.2725	9.22312	8.62592	8.66039	8.80582
ENSMUSG00000058454.16	Dhcr7	3.62912	3.64422	3.80826	4.84295	4.85237	4.73527	4.02969	3.8179	3.97248	5.45094	5.38829	5.42218
ENSMUSG00000018042.19	Cyb5r3	8.40167	8.4113	8.41112	9.1481	9.11963	9.15846	8.68427	8.70977	8.73495	9.13296	9.15022	9.13807
ENSMUSG00000027962.15	Vcam1	7.23219	7.27047	7.25679	7.69954	7.72236	7.71119	7.64047	7.61973	7.62465	7.98802	8.0194	8.01643
ENSMUSG00000030208.16	Emp1	8.28058	8.3016	8.31758	9.10754	9.09664	9.16431	8.45055	8.47672	8.48416	9.07843	9.1449	9.16552
ENSMUSG00000005410.7	Mcm5	5.29741	5.28846	5.29639	6.99207	6.89974	6.98411	5.36734	5.69133	5.57693	7.43028	7.43948	7.37888
ENSMUSG00000042599.9	Kdm7a	5.63096	5.64141	5.56814	4.56992	4.64712	4.65313	5.282	5.12825	5.13952	4.15157	4.18115	4.04579
ENSMUSG00000026127.14	Imp4	5.78633	5.78457	5.83264	5.37321	5.40458	5.40486	6.08594	6.05893	5.99965	4.55999	4.67166	4.66695
ENSMUSG00000022043.20	Trim35	8.53703	8.49831	8.51606	8.17269	8.15562	8.28793	8.67622	8.64435	8.60731	7.60461	7.59614	7.5722
ENSMUSG00000019942.14	Cdk1	6.13513	6.18698	6.18541	7.62069	7.57012	7.67544	6.23583	6.47408	6.44024	7.93599	8.00012	8.06318
ENSMUSG00000066543.9	Rpl17-ps9	6.82407	6.80687	6.81288	5.58429	5.51253	5.59105	6.15444	6.11399	6.12566	5.74122	5.62657	5.79391
ENSMUSG00000026864.14	Hspa5	9.70714	9.72638	9.74115	9.45795	9.5222	9.49692	9.96787	10.0273	10.0416	8.87737	8.94031	8.89725
ENSMUSG00000041577.6	Prelp	1.37663	1.30171	1.03828	3.0336	3.19217	3.12815	2.73246	2.71021	2.82919	3.98698	3.86349	4.08706
ENSMUSG00000028347.15	Tmeff1	6.61681	6.75586	6.71975	5.97954	5.97946	5.87737	6.52679	6.57902	6.48795	5.51704	5.56257	5.46129
ENSMUSG00000025150.11	Cbr2	5.43282	5.35558	5.45026	6.24046	6.25728	6.25119	4.63248	4.66848	4.78604	6.63827	6.70904	6.83488
ENSMUSG00000032115.15	Hyou1	8.26124	8.26784	8.26577	7.79882	7.80683	7.82092	8.04658	8.06965	8.0786	7.55802	7.54003	7.54561
ENSMUSG00000028194.16	Ddah1	6.67676	6.6805	6.74264	7.73123	7.73362	7.71799	7.1107	7.1707	7.1368	7.53218	7.51945	7.51096
ENSMUSG00000036672.6	Cenpt	4.44691	4.25004	4.2596	5.64177	5.60446	5.67841	4.54626	4.62412	4.56141	5.7394	5.76728	5.83991
ENSMUSG00000000740.13	Rpl13	9.79503	9.7712	9.77655	8.55616	8.53975	8.43366	9.27649	9.28951	9.33247	8.73033	8.68005	8.83577
ENSMUSG00000074071.12	Fam169b	1.24508	1.37333	1.21196	2.44074	2.49384	2.47836	2.80537	2.60362	2.73604	3.79943	3.76622	3.74635
ENSMUSG00000018593.14	Sparc	9.94879	9.94721	9.96669	11.3324	11.3121	11.2171	10.0382	10.0793	10.0837	10.7933	10.7919	10.8131
ENSMUSG00000039031.17	Arhgap18	2.53858	2.55945	2.53554	4.44876	4.51718	4.35729	1.99679	2.26955	2.31926	4.59954	4.68059	4.59127
ENSMUSG00000081895.4	Rpl17-ps10	7.72126	7.6562	7.73987	6.50056	6.54313	6.45223	7.0253	7.04129	7.03106	6.54734	6.52803	6.70613
ENSMUSG00000001525.11	Tubb5	9.34582	9.3615	9.36679	9.99171	9.96982	10.0288	8.95747	9.06998	9.05814	10.2689	10.2254	10.3327
ENSMUSG00000024063.14	Lbh	3.15917	3.16157	3.2343	5.28543	5.41495	5.24888	3.30572	3.61096	3.46222	5.00798	5.00503	4.99341
ENSMUSG00000028932.9	Psmc2	7.60951	7.57593	7.66418	6.76471	6.77071	6.82926	7.79905	7.75958	7.79898	6.71645	6.75131	6.77194
ENSMUSG00000001175.17	Calm1	7.60818	7.57372	7.61039	8.28526	8.31182	8.31316	7.98086	7.98425	8.02675	8.33216	8.326	8.35954
ENSMUSG00000111877.2	Gm6477	4.79855	4.81912	4.82641	3.57787	3.50944	3.56965	4.27443	4.25304	4.27172	3.40304	3.33006	3.37082
ENSMUSG00000027469.17	Tpx2	6.87113	6.83938	6.83988	7.92364	8.01123	7.99409	7.243	7.4813	7.4443	8.276	8.25483	8.24093
ENSMUSG00000022462.8	Slc38a2	9.30785	9.35234	9.31823	9.03265	9.10184	9.1002	9.10907	9.06687	9.08216	8.57533	8.56567	8.53773
ENSMUSG00000008668.16	Rps18	9.73308	9.71411	9.78295	8.58263	8.53905	8.56508	9.15251	9.14904	9.16405	8.65545	8.68641	8.84106
ENSMUSG00000025508.14	Rplp2	8.70479	8.68501	8.7747	7.59882	7.56478	7.5742	8.30543	8.25982	8.27528	7.58061	7.48802	7.70434
ENSMUSG00000027669.15	Gnb4	4.11512	4.035	4.14464	5.23488	5.18821	5.11993	4.25158	4.43299	4.43021	5.54795	5.57751	5.59904
ENSMUSG00000023034.8	Nr4a1	4.70651	4.65518	4.65771	5.43156	5.43068	5.44287	4.89572	4.85177	4.85307	5.79068	5.79037	5.87224
ENSMUSG00000028936.16	Rpl22	8.93507	8.89211	8.92914	8.0892	8.11651	8.12915	8.2914	8.29654	8.27232	8.11756	8.08062	8.18074
ENSMUSG00000007892.9	Rplp1	10.4089	10.3235	10.4199	9.25543	9.18435	9.17589	9.69817	9.71545	9.72164	9.39822	9.42263	9.51664
ENSMUSG00000028468.16	Rgp1	6.2554	6.31717	6.24534	5.98918	6.01801	5.9423	5.91429	5.97403	5.98911	5.14313	5.0409	4.93621
ENSMUSG00000042348.11	Arl15	5.43508	5.3862	5.32977	4.3765	4.40408	4.53243	5.66572	5.6283	5.665	3.79419	3.98535	3.84589
ENSMUSG00000041886.8	Macc1	1.35127	1.57919	1.31712	3.67872	3.84173	3.84167	2.14957	1.83404	1.77608	4.32614	4.17555	4.15009
ENSMUSG00000025203.7	Scd2	9.76442	9.78972	9.74155	10.0938	10.0858	10.0127	9.55968	9.53037	9.46632	10.7448	10.7073	10.628
ENSMUSG00000040782.13	Cop1	6.28334	6.42011	6.33455	5.56928	5.63455	5.56544	6.22727	6.16337	6.18854	5.17166	5.27826	5.21283
ENSMUSG00000063506.15	Arhgap22	6.12535	6.10476	6.17057	6.79059	6.75158	6.70715	6.61533	6.66133	6.67911	7.02259	7.02099	7.01364
ENSMUSG00000030432.13	Rpl28	8.82398	8.87331	8.9095	7.67391	7.66023	7.6627	8.30302	8.33652	8.39746	7.70111	7.69268	7.87262
ENSMUSG00000091269.3	Gm6682	4.24305	4.15162	4.25133	5.41112	5.23375	5.3008	4.45456	4.54743	4.59211	5.64661	5.63323	5.68556
ENSMUSG00000002602.17	Axl	8.95528	8.94295	8.94396	9.55513	9.55085	9.54814	9.35783	9.40725	9.38218	9.64974	9.65022	9.62351
ENSMUSG00000031626.19	Sorbs2	4.02975	3.98061	3.91473	5.16928	5.23788	5.01211	4.24389	4.2063	4.3107	5.59637	5.56149	5.48786
ENSMUSG00000042606.10	Hirip3	3.19526	3.41452	3.41988	4.82621	4.77583	4.85185	3.60384	3.72147	3.81655	5.09214	5.1341	5.03794
ENSMUSG00000022472.17	Desi1	7.51147	7.53601	7.56524	6.67924	6.66652	6.70548	7.41732	7.3618	7.44745	6.64167	6.65648	6.71685
ENSMUSG00000039105.7	Atp6v1g1	7.61918	7.59103	7.6311	6.65153	6.64309	6.7091	7.42686	7.38699	7.39745	6.50311	6.50364	6.67545
ENSMUSG00000022048.9	Dpysl2	3.46142	3.59013	3.45487	4.20436	4.40163	4.46147	3.13319	3.25449	3.23143	5.23291	5.24121	5.30317
ENSMUSG00000039158.12	Akna	4.56058	4.56374	4.54586	3.28844	3.54544	3.63911	4.0598	4.09779	4.20542	2.3877	2.22617	2.14181
ENSMUSG00000033970.16	Rfc3	3.91539	3.98443	3.91263	5.09978	4.95883	5.03894	4.16622	4.31604	4.38271	5.47785	5.486	5.6026
ENSMUSG00000027160.17	Ccdc34	4.01569	4.00336	3.88296	5.20137	5.19248	5.23037	4.09273	4.12318	4.23815	5.37817	5.31885	5.3611
ENSMUSG00000029672.17	Fam3c	6.31074	6.16445	6.2349	7.30395	7.28613	7.34486	6.53185	6.50047	6.52323	7.18305	7.20649	7.27053
ENSMUSG00000027115.15	Kif18a	3.00096	2.96308	3.07099	4.51758	4.66564	4.59765	3.37781	3.57215	3.67554	4.87629	4.95768	4.85192
ENSMUSG00000031807.11	Pgls	6.37745	6.247	6.38682	5.29695	5.27855	5.25728	6.1187	6.10255	6.12435	5.1091	5.22841	5.23289
ENSMUSG00000074656.13	Eif2s2	8.36688	8.42778	8.34368	8.01245	8.04659	8.08155	8.56806	8.54296	8.564	7.56904	7.58615	7.61295
ENSMUSG00000009927.10	Rps25	9.02675	9.00311	9.05847	7.90947	7.83812	7.91276	8.38533	8.35459	8.3694	7.8943	7.87923	8.07102
ENSMUSG00000026675.13	Hsd17b7	1.9752	1.87897	1.64462	3.81129	3.80135	3.64378	2.47814	2.59397	2.12299	4.54449	4.66568	4.58768
ENSMUSG00000034949.19	Zfr2	4.67363	4.57896	4.51026	2.49354	2.47529	2.11795	3.23296	3.41109	3.22818	1.78019	2.04143	2.0121
ENSMUSG00000018848.5	Rars	7.55187	7.688	7.60537	7.01113	7.05004	7.04693	8.11841	8.08351	8.08379	6.65858	6.73284	6.72205
ENSMUSG00000026586.17	Prrx1	8.66126	8.71655	8.6585	9.31818	9.33095	9.32479	8.89442	8.83598	8.82924	9.44764	9.5018	9.42422
ENSMUSG00000058603.11	Rpl28-ps1	6.95772	6.87888	6.98858	5.68626	5.72366	5.62392	6.44593	6.38908	6.4504	5.69843	5.75888	5.88546
ENSMUSG00000029093.15	Sorcs2	8.11758	8.12893	8.1226	7.66216	7.63968	7.60924	7.68576	7.7448	7.75147	7.31104	7.30725	7.20408
ENSMUSG00000053173.13	Rpl18-ps2	5.10022	5.00253	5.05455	3.65995	3.66686	3.65307	4.46387	4.40705	4.368	3.65867	3.6719	3.73124
ENSMUSG00000030246.13	Ldhb	4.35737	4.31363	4.16415	5.0365	4.982	5.1073	4.6039	4.6158	4.55493	5.69562	5.69081	5.8171
ENSMUSG00000113948.2	Rpl17-ps3	7.59033	7.54541	7.59185	6.35545	6.24707	6.32282	6.91938	6.84928	6.88555	6.47149	6.40238	6.59279
ENSMUSG00000050578.11	Mmp13	0.335048	0.250419	0.209204	2.0046	2.33835	2.55472	2.20134	2.01852	2.21134	3.74982	3.64378	3.79905
ENSMUSG00000024248.15	Cox7a2l	7.70789	7.71122	7.75442	6.8345	6.78843	6.75514	7.08121	7.05543	7.05077	6.87484	6.88281	6.94444
ENSMUSG00000093674.8	Rpl41	9.76615	9.77333	9.76661	8.43079	8.36362	8.28214	9.55751	9.46026	9.60751	8.6285	8.65272	8.73982
ENSMUSG00000029730.17	Mcm7	6.76945	6.77527	6.7302	7.38605	7.32078	7.38237	6.63753	6.66853	6.63771	7.58882	7.53225	7.57689
ENSMUSG00000019977.17	Hbs1l	7.33869	7.35436	7.30273	6.48908	6.47476	6.51602	7.44761	7.44888	7.48951	6.54136	6.56866	6.55774
ENSMUSG00000105692.2	Gm43737	4.44841	4.47019	4.40833	2.22497	2.51215	2.28269	3.24842	3.08224	2.95656	1.96545	1.74126	1.59223
ENSMUSG00000019961.18	Tmpo	7.70899	7.71855	7.75296	8.24847	8.29134	8.33019	8.01087	8.01882	7.94846	8.56883	8.57175	8.50019
ENSMUSG00000042354.8	Gnl3	7.72898	7.75392	7.73824	7.18935	7.23417	7.21047	7.85745	7.84954	7.8194	6.90287	6.92076	6.99997
ENSMUSG00000078087.6	Rps12l1	8.39421	8.37077	8.44115	7.17252	7.12557	7.17765	7.46939	7.45038	7.41078	7.33946	7.3026	7.4922
ENSMUSG00000030555.17	Ttc23	5.69853	5.66122	5.7715	4.66504	4.49319	4.63096	5.45593	5.42557	5.34651	4.33457	4.15861	4.1901
ENSMUSG00000025912.17	Mybl1	2.52729	2.50734	2.39247	4.45724	4.43919	4.31107	1.89827	2.36344	2.15762	4.80174	4.85367	4.67035
ENSMUSG00000028693.16	Nasp	5.51579	5.59286	5.47462	6.29522	6.28216	6.32137	5.91961	6.00304	5.97122	6.49775	6.46657	6.47659
ENSMUSG00000073702.12	Rpl31	8.38301	8.27876	8.37428	7.21011	7.09988	7.13122	7.65403	7.68199	7.72386	7.28297	7.26716	7.40598
ENSMUSG00000060636.15	Rpl35a	7.37887	7.41837	7.4311	6.34862	6.26674	6.23465	6.9338	6.93253	6.87336	6.45582	6.38367	6.50669
ENSMUSG00000083596.5	Rpl21-ps15	6.05834	6.10257	6.06507	4.82808	4.93358	4.91211	5.53183	5.4678	5.44159	4.76832	4.76506	4.93055
ENSMUSG00000027641.14	Rbl1	4.30051	4.31059	4.1048	5.40237	5.47335	5.43683	4.47706	4.45715	4.53004	5.64806	5.62401	5.56779
ENSMUSG00000017724.15	Etv4	2.45172	2.17461	2.45141	4.34941	4.21304	4.2373	2.50929	2.78423	2.7988	4.5372	4.58663	4.57686
ENSMUSG00000027447.7	Cst3	7.27287	7.2238	7.28035	8.03731	7.94948	7.94646	7.61802	7.59197	7.56286	8.14446	8.14742	8.26614
ENSMUSG00000046546.4	Fam43a	4.41206	4.40475	4.52817	5.68574	5.58676	5.70825	5.09278	4.95056	4.97649	5.74258	5.75841	5.81505
ENSMUSG00000011256.17	Adam19	3.8076	3.88583	3.78782	5.72691	5.70637	5.65489	4.50436	4.53488	4.40017	5.45481	5.51568	5.25645
ENSMUSG00000034771.16	Tle2	4.62286	4.63589	4.65771	6.15217	6.07454	6.1461	4.3863	4.3451	4.55623	5.92964	5.89335	6.0172
ENSMUSG00000031781.15	Ciapin1	6.27956	6.20304	6.28437	5.64442	5.61456	5.73639	6.55474	6.58908	6.61796	5.21148	5.27434	5.24206
ENSMUSG00000045817.9	Zfp36l2	8.45855	8.42032	8.47785	9.25864	9.26951	9.28742	8.93751	8.90035	8.90952	9.13032	9.1462	9.12847
ENSMUSG00000030835.7	Nomo1	7.64616	7.62505	7.63348	7.20112	7.23175	7.22281	7.86525	7.87255	7.87767	6.90611	6.92034	6.84042
ENSMUSG00000018899.18	Irf1	4.83904	4.82658	4.81636	5.68522	5.68686	5.73037	5.26614	5.47636	5.35698	6.03953	5.98586	6.05885
ENSMUSG00000071547.5	Nt5dc2	5.84715	5.67841	5.80691	6.83241	6.69635	6.69623	6.34883	6.38209	6.34431	7.05195	7.0473	7.18876
ENSMUSG00000007589.10	Tinf2	4.32515	4.2357	4.26453	5.45111	5.54235	5.49419	4.72714	4.9103	4.92115	5.60386	5.60434	5.64295
ENSMUSG00000017404.13	Rpl19	9.55404	9.50373	9.553	8.48543	8.42696	8.46326	9.09256	9.09756	9.07403	8.59953	8.57028	8.73456
ENSMUSG00000055723.7	Rras2	6.41083	6.33522	6.44491	5.70112	5.63141	5.58013	6.5369	6.6224	6.62168	5.38863	5.32519	5.34984
ENSMUSG00000034024.9	Cct2	9.57837	9.67013	9.6795	8.9147	8.91511	8.96314	9.36937	9.35745	9.36626	8.77541	8.7905	8.87422
ENSMUSG00000020186.8	Csrp2	5.9055	5.86131	5.99646	7.29519	7.22933	7.25997	5.66399	5.55992	5.55307	6.99453	7.03633	7.16366
ENSMUSG00000079523.9	Tmsb10	7.81978	7.89711	7.87733	8.80405	8.84315	8.76127	7.99697	8.07519	8.08176	8.75299	8.75567	8.87784
ENSMUSG00000073643.12	Wdfy1	6.36443	6.28851	6.35438	5.24891	5.31616	5.19661	6.13876	6.07072	6.15337	5.31196	5.2073	5.29586
ENSMUSG00000046186.9	Cd109	6.09319	6.09905	6.05702	6.69956	6.72974	6.55744	6.72359	6.84369	6.71443	7.14381	7.22998	7.22272
ENSMUSG00000040813.17	Tex264	7.21581	7.08092	7.14562	6.252	6.21354	6.25081	7.44812	7.3602	7.44587	6.20349	6.18508	6.24511
ENSMUSG00000092203.8	1110038B12Rik	7.84101	7.83781	7.87975	6.69393	6.62769	6.65837	6.9014	6.89495	6.90224	6.82074	6.86356	7.00132
ENSMUSG00000035258.16	Abi3bp	7.15938	7.12913	7.21679	8.72873	8.74515	8.75609	7.77269	7.73811	7.68107	7.93668	7.99019	7.96327
ENSMUSG00000027170.13	Eif3m	7.12283	7.12891	7.16754	6.29217	6.31578	6.34772	6.79115	6.67684	6.75031	6.24915	6.17143	6.26997
ENSMUSG00000081094.5	Rpl19-ps11	8.04317	8.15679	8.08307	7.00845	7.03548	7.06619	7.6434	7.63951	7.69587	7.16795	7.12182	7.25099
ENSMUSG00000045092.9	S1pr1	2.86864	2.75089	2.7385	4.3816	4.36684	4.34013	3.47304	3.66266	3.70627	4.51828	4.4725	4.58047
ENSMUSG00000091639.3	Gm3756	3.8535	3.77559	3.88296	5.01696	4.90355	5.022	3.98607	4.19197	4.099	5.26669	5.27368	5.35267
ENSMUSG00000028587.19	Orc1	2.03218	2.049	1.83373	3.71353	3.69918	3.74937	2.52968	2.51434	2.67042	4.22213	4.38055	4.08027
ENSMUSG00000033730.5	Egr3	2.1836	2.04169	2.09263	5.35646	5.30833	5.35448	2.4886	2.42462	2.30079	3.83385	4.04647	3.9239
ENSMUSG00000034994.11	Eef2	13.1898	13.204	13.2124	12.3094	12.2831	12.2666	12.5141	12.4889	12.5021	12.5144	12.4794	12.5015
ENSMUSG00000038550.11	Ciart	4.06334	3.96524	4.18514	2.8322	3.21191	3.18372	4.30581	4.41392	4.50203	1.07507	1.41979	1.1086
ENSMUSG00000068397.5	Gm10240	5.97411	5.9884	5.97302	4.67234	4.71686	4.75483	5.39887	5.36798	5.41822	4.73319	4.65867	4.86977
ENSMUSG00000083394.3	Gm11703	5.42296	5.4959	5.47888	4.24551	4.36809	4.31693	4.85791	4.8365	4.78383	4.23507	4.15577	4.26545
ENSMUSG00000046179.18	E2f8	2.12492	2.07788	2.19275	3.95512	3.96813	3.83964	2.25745	2.60362	2.44792	4.34177	4.27187	4.21203
ENSMUSG00000001424.15	Snd1	7.92468	7.92444	7.97322	7.46763	7.47123	7.42045	7.69792	7.7433	7.68152	7.16289	7.18312	7.0907
ENSMUSG00000001016.13	Ilf2	6.37902	6.38046	6.40483	6.9161	6.96288	6.96907	6.79141	6.84623	6.85423	7.14723	7.18242	7.21129
ENSMUSG00000066443.6	Gm10163	5.85111	5.8809	5.86063	4.57661	4.60723	4.6415	5.2805	5.25309	5.31081	4.61743	4.54271	4.74853
ENSMUSG00000078302.6	Foxd1	4.00556	3.86941	3.92724	5.28951	5.16743	5.23037	4.35521	4.2561	4.40161	5.2648	5.28283	5.25645
ENSMUSG00000094724.9	Rnaset2b	6.19429	6.13727	6.19363	5.73341	5.69139	5.61086	6.37373	6.42355	6.38907	5.21605	5.23718	5.23672
ENSMUSG00000020472.15	Zkscan17	6.93602	6.9729	6.92657	6.2724	6.24911	6.18506	6.6965	6.66104	6.66324	6.08596	6.13906	6.04539
ENSMUSG00000113061.2	Rps18-ps5	7.19368	7.2004	7.25803	6.04892	5.98684	5.98571	6.60876	6.55621	6.59698	6.11109	6.05613	6.26847
ENSMUSG00000062093.6	Gm10110	6.34488	6.34935	6.44744	5.50236	5.59161	5.57891	5.80558	5.81851	5.92875	5.21148	5.22164	5.32634
ENSMUSG00000028495.15	Rps6	9.31417	9.30715	9.33946	8.1846	8.19067	8.24392	8.72312	8.68363	8.69492	8.36922	8.35455	8.52245
ENSMUSG00000039070.6	Cpa4	1.99171	2.15442	1.8069	4.31649	4.29463	4.1448	3.50171	3.37492	3.26039	4.24533	4.21294	4.39982
ENSMUSG00000012848.16	Rps5	9.90414	9.84296	9.94224	8.81222	8.87317	8.77982	9.35534	9.37168	9.37759	8.96834	8.95408	9.08451
ENSMUSG00000067147.8	Rpl7a-ps11	7.97939	8.01866	7.98349	7.11797	7.09591	7.20417	7.53012	7.53526	7.60737	7.08161	7.10571	7.17666
ENSMUSG00000098234.8	Snhg6	5.92121	5.85767	5.93841	4.64715	4.71982	4.72098	5.24162	5.21974	5.15503	4.57228	4.47021	4.70279
ENSMUSG00000017550.15	Atad5	4.06724	4.035	3.99616	5.3597	5.40028	5.41104	4.31905	4.4704	4.39727	5.63592	5.67997	5.408
ENSMUSG00000026880.12	Stom	5.73821	5.78074	5.84533	6.41544	6.38602	6.44121	6.30402	6.23769	6.32006	6.69905	6.662	6.67602
ENSMUSG00000105987.5	AI506816	7.69535	7.70949	7.74694	8.3559	8.39964	8.38925	8.54648	8.57888	8.61371	8.42807	8.40389	8.41926
ENSMUSG00000091955.3	Gm9844	5.99627	6.03975	6.04941	7.01769	7.00692	6.95927	6.1569	6.22055	6.28173	6.98097	6.92243	7.04823
ENSMUSG00000099927.2	Gm8226	7.95038	7.99094	7.95755	7.08804	7.0691	7.18066	7.50217	7.5095	7.58211	7.05377	7.07858	7.14525
ENSMUSG00000027397.15	Slc20a1	6.84609	6.8378	6.83131	7.31716	7.32855	7.34755	7.49765	7.51462	7.52938	7.60511	7.60281	7.52574
ENSMUSG00000025794.10	Rpl14	8.77168	8.82031	8.82335	7.73846	7.78417	7.79413	8.21711	8.2042	8.24733	7.83234	7.86712	8.00357
ENSMUSG00000019845.9	Tube1	2.8731	2.6245	2.75731	4.06385	4.02502	3.97734	2.85066	3.19507	3.15809	4.75581	4.76879	4.85789
ENSMUSG00000002718.15	Cse1l	6.41045	6.50925	6.41412	7.06047	7.06717	7.10204	6.59431	6.67169	6.70422	7.29707	7.34205	7.33708
ENSMUSG00000007655.17	Cav1	9.34372	9.354	9.34204	9.82549	9.81049	9.84269	9.8213	9.85293	9.79859	10.0101	10.0189	10.0802
ENSMUSG00000019849.12	Prep	7.49509	7.49763	7.48799	7.2022	7.17811	7.2269	7.83816	7.82345	7.86856	6.76876	6.77951	6.81147
ENSMUSG00000048387.9	Osr1	4.61222	4.59028	4.64641	5.62304	5.51026	5.70043	5.55813	5.5011	5.50548	5.80203	5.87056	5.96049
ENSMUSG00000099764.2	Rps10-ps2	7.84868	7.69748	7.85513	6.5333	6.51362	6.409	7.2009	7.11632	7.12744	6.56998	6.56491	6.68416
ENSMUSG00000010362.10	Rdm1	2.837	2.43666	2.38038	3.97382	4.03772	3.93225	1.14258	1.03247	1.1905	4.77719	4.83868	4.96694
ENSMUSG00000012405.17	Rpl15	9.37277	9.39446	9.41159	8.46957	8.39032	8.48709	8.88814	8.90792	8.91882	8.51866	8.50234	8.63349
ENSMUSG00000002083.14	Bbc3	5.04294	5.05248	5.12142	4.73746	4.65744	4.63213	4.82218	4.88875	4.90493	3.83555	3.81927	3.87564
ENSMUSG00000025417.9	Pip4k2c	6.82147	6.8722	6.87825	6.2387	6.21249	6.23813	6.54161	6.53019	6.5282	6.12401	6.08593	6.07433
ENSMUSG00000031016.10	Wee1	4.91351	4.87776	4.84522	5.63002	5.53733	5.62155	5.20958	5.12238	5.05756	5.99308	5.99026	5.95725
ENSMUSG00000060438.6	Rps10-ps1	6.5055	6.38119	6.46793	5.1876	5.02487	5.10815	5.76529	5.7855	5.70418	5.19038	5.10566	5.30609
ENSMUSG00000055065.8	Ddx17	10.0976	10.039	10.0557	9.61636	9.62044	9.63208	9.92551	9.87349	9.86212	9.15725	9.18379	8.98874
ENSMUSG00000100078.2	Gm6170	6.92317	6.83066	6.96348	5.75076	5.74074	5.7353	6.08895	6.04216	6.11293	5.78585	5.75981	5.93905
ENSMUSG00000024912.7	Fosl1	4.28049	4.41893	4.39187	5.62035	5.6382	5.56359	4.49532	4.50558	4.65889	5.62367	5.65754	5.72749
ENSMUSG00000028583.15	Pdpn	4.77847	4.99309	4.92641	5.89287	5.92327	5.91407	5.58822	5.53176	5.46666	6.11249	6.12059	6.2542
ENSMUSG00000025151.17	Maged1	8.76141	8.72463	8.75363	9.12628	9.10316	9.03109	8.51845	8.47006	8.50942	9.47011	9.45983	9.51951
ENSMUSG00000006678.7	Pola1	4.8504	4.90822	4.88639	5.85669	5.92797	5.96766	5.11235	5.16457	5.17629	5.92566	5.89164	5.86435
ENSMUSG00000022474.16	Pmm1	7.00957	6.94379	7.04779	5.98416	5.93095	5.98156	7.22416	7.08027	7.16918	5.99231	5.93663	6.05799
ENSMUSG00000095597.3	Rps7-ps3	6.93736	6.92156	7.00687	5.35127	5.30439	5.2919	6.39542	6.40745	6.37369	5.21735	5.19904	5.49107
ENSMUSG00000035530.14	Eif1	8.85576	8.81295	8.88104	8.23029	8.23156	8.24344	8.42261	8.45556	8.60032	7.83489	7.94666	7.89519
ENSMUSG00000051864.11	Tbc1d22a	5.65189	5.79711	5.73697	4.82901	4.78339	4.88673	5.42428	5.42761	5.32611	4.54553	4.55139	4.53894
ENSMUSG00000045128.10	Rpl18a	9.88683	9.80116	9.91906	8.63551	8.60431	8.55513	9.37365	9.35352	9.34247	8.76725	8.73011	8.91562
ENSMUSG00000000567.6	Sox9	3.87591	4.02205	3.82396	5.1781	5.28987	5.19978	4.90258	4.69694	4.75811	5.39671	5.39795	5.34134
ENSMUSG00000034192.6	Lsm3	4.11324	3.94775	3.96818	5.43586	5.23444	5.37499	4.15314	4.35514	4.35762	5.64224	5.78486	5.82423
ENSMUSG00000045763.9	Basp1	7.23393	7.18161	7.20763	7.67611	7.65418	7.59665	7.02305	7.0424	7.01203	7.93381	7.91034	7.94246
ENSMUSG00000034463.5	Scara3	6.01153	6.02407	5.99051	6.42659	6.43062	6.40626	6.23389	6.19563	6.2371	6.77784	6.84758	6.76983
ENSMUSG00000022021.15	Diaph3	4.91784	4.83506	4.88211	6.33291	6.28483	6.34521	5.03153	5.30355	5.12647	6.19292	6.14981	6.10521
ENSMUSG00000041406.15	BC055324	2.98455	2.96694	3.04444	4.29772	4.42356	4.35017	3.17263	3.14638	3.42292	4.68969	4.78543	4.705
ENSMUSG00000025355.8	Mmp19	6.55634	6.49628	6.43545	5.67954	5.64028	5.81561	6.1736	6.20676	6.16065	5.39671	5.45859	5.44617
ENSMUSG00000030717.10	Nupr1	7.85052	7.89749	7.87975	7.38732	7.40633	7.53185	8.31895	8.24322	8.27183	6.5398	6.60896	6.7456
ENSMUSG00000040084.10	Bub1b	5.04096	4.91923	5.01602	6.89306	6.87431	6.88776	5.03866	5.38277	5.32763	7.40932	7.43406	7.39198
ENSMUSG00000043716.14	Rpl7	9.52703	9.53887	9.54295	8.51851	8.5091	8.5566	9.13181	9.05697	9.12741	8.55213	8.58224	8.73374
ENSMUSG00000037242.9	Clic4	8.68992	8.64864	8.67806	8.51525	8.54996	8.52744	8.8791	8.96186	8.93998	7.99364	7.95812	7.9243
ENSMUSG00000027357.17	Crls1	5.85224	5.78293	5.88809	5.2983	5.27387	5.40349	6.01628	6.01801	5.98092	4.77896	4.62618	4.67712
ENSMUSG00000046731.6	Kctd11	3.67586	3.7263	3.71753	5.31039	5.17965	5.25576	3.93729	3.99886	3.92503	5.03486	4.93216	4.95491
ENSMUSG00000064281.8	Rpl19-ps1	6.58315	6.57402	6.58245	5.49237	5.47335	5.44822	6.11449	6.14778	6.20684	5.57465	5.59597	5.71986
ENSMUSG00000029614.14	Rpl6	9.34958	9.36425	9.38557	8.49053	8.47399	8.48327	8.94803	8.95321	8.94693	8.62039	8.5766	8.70565
ENSMUSG00000025810.10	Nrp1	4.51275	4.55862	4.59766	5.88076	5.89477	5.86593	4.36518	4.35514	4.40881	5.84104	5.69718	5.66071
ENSMUSG00000004562.17	Arhgef40	7.40029	7.35528	7.40636	7.92866	7.92257	7.87615	7.18792	7.18945	7.20831	8.167	8.1824	8.07967
ENSMUSG00000078921.4	Tgtp2	1.21726	1.01867	1.45024	2.35516	2.10496	2.32981	4.43036	4.35799	4.41025	3.62958	3.7939	3.62549
ENSMUSG00000051920.8	Rspo2	6.49721	6.4852	6.54674	7.57716	7.54949	7.59801	7.53075	7.38052	7.31204	7.5268	7.54044	7.49524
ENSMUSG00000084383.2	Gm13370	5.67635	5.72193	5.70584	4.42919	4.46291	4.48768	5.12246	5.08927	5.14988	4.45224	4.37811	4.59366
ENSMUSG00000004473.11	Clec11a	2.61518	2.27775	2.39247	4.25527	4.18621	3.93606	2.95614	2.90624	3.05901	4.59152	4.6924	4.80218
ENSMUSG00000041935.11	AW549877	7.39758	7.37885	7.35364	6.89952	6.98885	6.97139	6.80899	6.74902	6.73435	6.5246	6.58855	6.58621
ENSMUSG00000022463.9	Srebf2	8.37713	8.28293	8.30864	8.86713	8.80456	8.80433	8.19383	8.16888	8.17047	9.14389	9.14343	9.04644
ENSMUSG00000054717.8	Hmgb2	4.93928	4.84139	4.7045	6.33159	6.38757	6.36479	5.11151	5.30133	5.36884	6.42596	6.39817	6.4613
ENSMUSG00000081406.5	Rps6-ps4	8.15563	8.18464	8.16724	7.0513	7.02715	7.02226	7.56404	7.53178	7.49442	7.22337	7.1615	7.35884
ENSMUSG00000083087.2	Gm11249	7.14145	7.05324	7.16072	6.09274	6.02957	6.13371	6.77174	6.80891	6.82195	6.12436	6.0993	6.23711
ENSMUSG00000078771.11	Evi2a	5.023	5.12171	4.98444	5.70622	5.69088	5.75486	5.72274	5.54371	5.57693	6.19986	6.18194	6.29183
ENSMUSG00000029482.5	Aacs	5.90332	5.87217	5.88809	6.22918	6.17671	6.13288	6.20565	6.18523	6.21055	6.79017	6.69956	6.71219
ENSMUSG00000024007.16	Ppil1	4.88175	4.84349	4.93882	5.71988	5.65168	5.6427	5.38914	5.36727	5.46251	5.93955	5.87143	5.93717
ENSMUSG00000017499.16	Cdc6	2.15456	2.085	2.17887	4.25527	4.12507	4.21708	2.30555	2.91402	2.56604	4.91539	5.0074	4.88642
ENSMUSG00000002227.16	Mov10	5.28071	5.19272	5.22724	5.68729	5.65683	5.65432	5.43851	5.38696	5.43173	6.12157	6.11072	6.16947
ENSMUSG00000026281.16	Dtymk	4.54528	4.53018	4.57928	5.33098	5.28522	5.28669	4.96382	5.00073	4.9794	5.60486	5.56578	5.68835
ENSMUSG00000056904.4	Gm5620	4.68001	4.60771	4.62096	5.80113	5.66606	5.78158	4.7717	5.02877	4.99576	6.12991	5.99782	6.05322
ENSMUSG00000007739.11	Cct4	8.67618	8.76257	8.77124	7.84133	7.85537	7.80329	8.30061	8.258	8.2932	7.93886	7.95353	8.02375
ENSMUSG00000022037.16	Clu	2.69801	2.48596	2.41633	3.91873	3.92608	3.88767	3.43028	3.48606	3.61205	4.39806	4.35103	4.51771
ENSMUSG00000061787.16	Rps17	8.98503	8.95401	8.98163	7.91047	7.90254	7.89928	8.56606	8.5099	8.49832	8.03999	7.99496	8.18807
ENSMUSG00000023904.11	Hcfc1r1	5.41686	5.47977	5.46536	6.26724	6.29676	6.32646	5.95067	6.09102	6.01436	6.4913	6.53132	6.68473
ENSMUSG00000022558.17	Mroh1	8.00542	7.95455	7.93604	7.07137	6.99232	7.06009	7.80246	7.7329	7.76977	7.16356	7.12018	7.02497
ENSMUSG00000026923.16	Notch1	4.55642	4.584	4.55932	5.6513	5.58297	5.66985	4.29393	4.38762	4.3591	5.80376	5.72237	5.64295
ENSMUSG00000020844.7	Nxn	5.72469	5.74743	5.75755	6.64492	6.57858	6.64563	5.96197	5.95672	5.94965	6.5015	6.51561	6.53462
ENSMUSG00000081051.5	Gm15427	8.74826	8.64751	8.76602	7.44496	7.51628	7.39471	8.20972	8.17991	8.21132	7.59837	7.51917	7.70834
ENSMUSG00000042515.14	Pwwp3b	3.95593	4.06955	3.95805	5.31573	5.31616	5.39866	4.51974	4.57468	4.32448	5.40246	5.37552	5.37991
ENSMUSG00000069862.7	Rps12-ps9	7.61052	7.57925	7.67163	6.39603	6.3745	6.41618	6.71944	6.70177	6.64292	6.58319	6.53296	6.73401
ENSMUSG00000003429.12	Rps11	9.02906	9.11746	9.08011	8.1497	8.1517	8.12143	8.60517	8.56567	8.59101	8.06384	8.04209	8.23502
ENSMUSG00000045136.7	Tubb2b	3.69615	3.80179	3.7103	4.58437	4.4332	4.52232	4.05629	4.15306	4.03712	5.03412	5.06155	5.11977
ENSMUSG00000027331.16	Knstrn	4.46919	4.41893	4.57663	6.05213	5.98684	6.22612	4.71939	4.91127	4.89163	6.43018	6.43878	6.55407
ENSMUSG00000024299.18	Adamts10	5.14427	5.00911	5.07625	5.85852	5.81867	5.86643	4.58088	4.48091	4.50875	6.07916	6.08816	6.06833
ENSMUSG00000055093.11	Rps27a-ps3	7.47944	7.53048	7.50982	6.23554	6.10841	6.02561	7.02238	7.01712	6.98891	6.13785	6.13473	5.93998
ENSMUSG00000032883.16	Acsl3	4.84359	4.86125	4.82864	5.78918	5.90737	5.80053	4.55996	4.45315	4.37831	5.94626	5.97542	5.99478
ENSMUSG00000049881.14	2810025M15Rik	4.01164	4.0202	3.98822	5.26901	5.18179	5.23579	4.3807	4.6418	4.61969	5.41103	5.44701	5.5562
ENSMUSG00000027208.15	Fgf7	6.53044	6.60224	6.54065	7.41448	7.45402	7.44841	7.13212	7.09017	7.03712	7.3432	7.33751	7.41411
ENSMUSG00000008682.14	Rpl10	9.45754	9.47077	9.48792	8.61298	8.5492	8.58457	8.88115	8.83489	8.79845	8.64743	8.62313	8.75424
ENSMUSG00000005045.17	Chd5	3.00096	3.0274	3.05967	2.53991	2.67539	2.70972	3.3918	3.41109	3.40861	0.695442	0.727856	0.397864
ENSMUSG00000017861.12	Mybl2	3.2951	2.85464	2.94949	5.00544	5.04466	4.87089	3.48875	3.66266	3.6563	5.28733	5.28803	5.28777
ENSMUSG00000028370.8	Pappa	6.57769	6.65259	6.61278	5.17296	5.23512	5.09883	6.99261	6.86215	6.92402	5.23033	5.30224	5.04407
ENSMUSG00000042082.8	Arsb	5.58612	5.58785	5.51179	6.51165	6.51305	6.42875	5.30141	5.42489	5.36069	6.51376	6.4614	6.54515
ENSMUSG00000099980.2	Gm5619	6.26307	6.23704	6.21462	5.27519	5.27789	5.38965	5.72992	5.66967	5.76157	5.21409	5.28998	5.28924
ENSMUSG00000035441.15	Myo1d	6.9522	6.98438	6.95154	6.31802	6.24433	6.25349	6.77895	6.74602	6.77422	6.08489	6.05002	5.89663
ENSMUSG00000031939.17	Taf1d	6.73155	6.68755	6.69496	5.54391	5.6803	5.67784	6.3542	6.42797	6.44515	5.78673	5.80813	5.78139
ENSMUSG00000041939.15	Mvk	3.50808	3.48896	3.47774	4.67961	4.36809	4.50959	3.84468	3.76297	3.87597	5.13487	5.1225	5.31986
ENSMUSG00000097789.3	Gm2115	4.33489	4.26581	4.35376	5.59696	5.65426	5.57464	4.79821	5.01074	4.95402	5.57057	5.55719	5.52588
ENSMUSG00000028517.9	Plpp3	2.14721	2.30853	2.41633	4.16051	4.23663	4.23884	2.62281	2.69675	2.80318	4.11565	4.11976	4.11394
ENSMUSG00000013662.7	Atad1	7.42767	7.47016	7.41045	6.91917	6.85561	6.91191	7.35493	7.28027	7.24681	6.67029	6.64183	6.63312
ENSMUSG00000042766.18	Trim46	5.37026	5.30535	5.25811	4.31516	4.19615	4.28142	4.92103	4.83343	4.87923	3.96541	3.66592	3.74205
ENSMUSG00000020023.19	Tmcc3	4.17599	3.9996	4.12486	3.16072	3.30411	3.20599	4.42356	4.48875	4.48304	2.35015	2.47902	2.42003
ENSMUSG00000068196.6	Col8a1	4.84246	4.94297	4.83197	5.89108	5.88646	5.79319	5.82737	5.98377	5.96634	6.03695	6.07882	5.95817
ENSMUSG00000022887.10	Masp1	8.05525	8.01761	8.0527	7.27426	7.33323	7.37203	8.61505	8.55	8.58435	7.33226	7.34002	7.32114
ENSMUSG00000063975.14	Slco1a5	0.410678	0.117683	0.548525	2.39607	2.72333	2.84968	1.34028	1.24474	1.1905	3.38226	3.50997	3.56348
ENSMUSG00000041654.16	Slc39a11	5.22244	5.23899	5.25811	4.61285	4.50352	4.54746	5.73762	5.61405	5.66078	4.08025	3.92487	4.05101
ENSMUSG00000020034.8	Tcp11l2	4.70276	4.8951	4.85943	4.26082	4.2004	4.03889	4.6407	4.45315	4.55753	3.22258	3.18148	3.14842
ENSMUSG00000028180.19	Zranb2	7.41548	7.5033	7.36019	6.94847	7.00004	6.98296	6.9725	6.94729	6.921	6.58849	6.63061	6.57053
ENSMUSG00000027353.15	Mcm8	3.51666	3.43419	3.54152	4.74342	4.83612	4.8679	3.63712	3.85474	3.91899	4.97828	5.05394	5.00602
ENSMUSG00000031565.19	Fgfr1	7.56607	7.54557	7.552	8.12462	8.13278	8.09684	7.72719	7.82125	7.79514	8.25361	8.28408	8.2207
ENSMUSG00000029687.17	Ezh2	5.53	5.57841	5.49788	6.14693	6.24638	6.1212	5.2977	5.37574	5.22444	6.5275	6.50001	6.54946
ENSMUSG00000027210.21	Meis2	5.18433	5.2205	5.21284	4.43288	4.33248	4.46938	5.5803	5.39532	5.46942	3.8608	3.97733	3.91628
ENSMUSG00000020330.17	Hmmr	4.30217	4.20494	4.3351	5.90355	5.91341	5.98156	3.78654	4.09266	4.17702	6.25774	6.33614	6.22406
ENSMUSG00000027752.16	Exosc8	5.39685	5.32806	5.45819	6.0826	6.11628	6.14487	5.65299	5.81696	5.71118	6.42087	6.46571	6.5675
ENSMUSG00000062458.6	Gm8623	5.56559	5.54584	5.67463	4.2746	4.34402	4.2978	4.92873	4.84771	4.909	4.30544	4.33605	4.4704
ENSMUSG00000078377.6	Gm4294	7.41452	7.38157	7.4162	6.35609	6.29147	6.35272	6.87499	6.81645	6.88761	6.49963	6.50727	6.63602
ENSMUSG00000046721.12	Rpl14-ps1	7.58558	7.64177	7.66122	6.62354	6.59532	6.63599	6.98363	6.97335	7.05146	6.6812	6.67173	6.82957
ENSMUSG00000008398.17	Elk3	6.66329	6.63053	6.66943	7.20094	7.13501	7.11975	6.41919	6.50047	6.42682	7.39411	7.44196	7.40649
ENSMUSG00000032380.10	Dapk2	1.82664	1.55885	1.88594	3.98224	3.93628	3.90722	2.64167	2.54472	2.492	3.97469	3.76249	3.83584
ENSMUSG00000020224.16	Llph	6.0396	6.05481	6.01758	5.40738	5.49595	5.47859	6.2824	6.31464	6.40645	4.99206	5.02853	5.11894
ENSMUSG00000028792.15	Ak2	5.9442	5.84356	5.97553	6.29183	6.27246	6.214	6.62455	6.67026	6.62972	6.76274	6.74329	6.78767
ENSMUSG00000027955.17	Gask1b	8.62806	8.58971	8.61219	7.57744	7.66548	7.53484	8.85449	8.8304	8.82985	7.90597	7.90538	7.8834
ENSMUSG00000024782.8	Ak3	6.13048	6.23544	6.21632	5.49884	5.44027	5.52045	5.9302	5.93251	5.90704	5.33797	5.32202	5.30025
ENSMUSG00000037572.18	Wdhd1	4.00149	4.08207	4.13927	5.48764	5.40458	5.56851	4.45856	4.63358	4.74451	5.67013	5.69571	5.54329
ENSMUSG00000057657.5	Rps18-ps3	6.44233	6.40701	6.47611	5.28066	5.15946	5.19581	5.86898	5.84418	5.80043	5.28981	5.30929	5.48336
ENSMUSG00000016534.16	Lamp2	9.51467	9.59468	9.57813	9.05208	9.06816	9.06696	9.34625	9.27287	9.28099	8.86971	8.90298	8.9034
ENSMUSG00000019087.14	Atp6ap1	8.78913	8.79852	8.8457	8.31407	8.28545	8.31782	8.60247	8.57337	8.60613	8.07476	8.09562	8.18024
ENSMUSG00000025544.14	Tm9sf2	8.20338	8.18163	8.16801	7.96576	7.99372	8.00093	8.36197	8.3348	8.28843	7.55673	7.54302	7.53897
ENSMUSG00000007950.10	Abhd8	5.49712	5.567	5.53446	5.86627	5.81406	5.68974	5.15729	5.06153	5.03632	6.58748	6.55146	6.68052
ENSMUSG00000036323.15	Srp72	7.76514	7.83623	7.74164	7.36511	7.40204	7.36903	7.64427	7.65279	7.62387	7.09693	7.10755	7.06705
ENSMUSG00000006782.17	Cnp	2.23997	2.33269	2.10001	3.86145	3.71507	3.61315	2.90241	2.8011	2.91669	4.16245	4.1183	4.29657
ENSMUSG00000085148.2	Mir22hg	5.85281	5.77634	5.85136	5.3428	5.37862	5.36512	5.48037	5.52923	5.52219	4.73501	4.89515	4.78138
ENSMUSG00000090733.7	Rps27	8.52219	8.54679	8.48307	7.54086	7.60425	7.49744	7.65316	7.5218	7.71793	7.57465	7.6207	7.56628
ENSMUSG00000034021.16	Pds5b	5.82888	5.96106	5.93532	6.72261	6.73169	6.75756	6.05373	6.1804	6.10496	6.9509	6.99479	6.82373
ENSMUSG00000028029.12	Aimp1	6.6198	6.63357	6.64376	5.95963	5.87722	5.9672	6.30476	6.25999	6.19272	5.70681	5.68737	5.80684
ENSMUSG00000022982.11	Sod1	7.60147	7.60226	7.62551	6.89908	6.81425	6.86894	7.16223	7.0497	7.08737	6.82309	6.80581	6.87544
ENSMUSG00000081049.2	Rps24-ps3	5.92013	5.83671	5.98952	4.60633	4.49434	4.49932	5.37229	5.42897	5.27183	4.69999	4.66867	4.77508
ENSMUSG00000063457.15	Rps15	9.97391	9.91135	10.0078	8.849	8.75389	8.78953	9.57946	9.62289	9.61718	9.05277	9.03426	9.19418
ENSMUSG00000062510.13	Nsl1	2.06376	2.40852	2.35591	4.14709	4.28535	4.27691	2.45167	2.80947	2.87568	4.46217	4.49403	4.54389
ENSMUSG00000112825.2	Gm9118	6.24554	6.39523	6.28518	5.02676	5.05328	5.13576	5.82942	5.66218	5.76101	4.87546	4.85103	5.06746
ENSMUSG00000027800.15	Tm4sf1	4.94671	4.72186	4.74512	6.31034	6.20372	6.11827	5.44926	5.64183	5.51886	6.78402	6.79694	6.88376
ENSMUSG00000110679.2	Rpl10-ps5	6.86414	6.85796	6.80499	5.98164	5.86258	5.94656	6.25816	6.18402	6.19063	5.99384	5.98906	6.0467
ENSMUSG00000022974.13	Paxbp1	7.37789	7.33878	7.39364	6.78555	6.82298	6.9165	7.52965	7.49547	7.48218	6.61248	6.60062	6.55927
ENSMUSG00000024231.16	Cul2	6.5466	6.55103	6.64249	5.70061	5.82234	5.73912	6.81341	6.7802	6.72081	5.69983	5.67154	5.71548
ENSMUSG00000027784.11	Ppm1l	5.21014	5.2604	5.17748	4.93778	4.80304	4.87586	4.97036	5.02518	4.98808	4.15157	4.11098	4.09214
ENSMUSG00000061983.8	Rps12	8.42361	8.3302	8.45598	7.36157	7.30807	7.21656	7.49587	7.4945	7.51893	7.32366	7.33469	7.47563
ENSMUSG00000057841.6	Rpl32	9.93154	9.89693	9.96074	8.79881	8.76651	8.75265	9.43285	9.40704	9.36469	9.07439	9.05276	9.2147
ENSMUSG00000022346.18	Myc	8.12567	8.1535	8.1201	7.80832	7.82308	7.82696	8.38402	8.43509	8.47071	7.39714	7.44298	7.48996
ENSMUSG00000045690.9	Wdr89	6.16411	6.14752	6.18584	5.08969	4.99264	5.08086	5.75342	5.76037	5.7627	5.07426	4.97068	5.2066
ENSMUSG00000025967.17	Eef1b2	8.66978	8.68801	8.72667	7.76542	7.81261	7.78001	7.87375	7.86655	7.83646	7.98218	7.94789	8.06027
ENSMUSG00000042821.8	Snai1	4.00759	4.06415	4.05436	4.56768	4.58578	4.52105	3.77164	3.82823	3.79031	5.10276	5.18725	5.11479
ENSMUSG00000031134.17	Rbmx	5.48624	5.47095	5.42695	4.92648	4.95966	4.94464	4.51079	4.52221	4.5432	4.50659	4.47706	4.4161
ENSMUSG00000081559.4	Gm12411	5.02099	5.18942	5.17136	3.88679	3.84354	3.7815	4.50049	4.50686	4.40305	3.73896	3.79024	3.88542
ENSMUSG00000031673.7	Cdh11	6.79496	6.75306	6.83158	8.29214	8.33072	8.35122	7.29568	7.48212	7.46553	7.67737	7.71735	7.67729
ENSMUSG00000040599.14	Mis12	4.96668	4.92818	4.88959	5.74978	5.7605	5.79003	5.21667	5.32923	5.24793	5.85912	5.83236	5.83689
ENSMUSG00000039242.11	B3galnt2	5.85901	5.82078	5.82095	4.97707	5.10998	5.11321	5.68687	5.60926	5.63583	4.8705	4.81995	4.82879
ENSMUSG00000022450.7	Ndufa6	6.74865	6.65857	6.64849	5.89331	5.95666	5.83972	6.01447	5.99893	5.91263	5.64467	5.78072	5.72803
ENSMUSG00000001909.17	Trmt1	7.47523	7.46829	7.52995	6.76666	6.76833	6.72901	7.1164	7.16317	7.16089	6.79017	6.77396	6.83412
ENSMUSG00000081855.5	Rpl17-ps5	7.01488	6.97506	7.01079	5.75961	5.77052	5.6251	6.32496	6.343	6.28094	5.84695	5.80722	6.02562
ENSMUSG00000073802.6	Cdkn2b	6.14578	6.13083	6.21845	6.64093	6.56028	6.52522	6.32678	6.38244	6.38177	6.9892	6.97739	7.06511
ENSMUSG00000029060.18	Mib2	6.21334	6.16697	6.1919	5.69653	5.66963	5.64387	5.97085	6.03683	6.03266	5.37116	5.41765	5.33207
ENSMUSG00000022010.20	Tsc22d1	8.02949	7.95783	8.03004	8.61812	8.59836	8.55024	8.3308	8.34967	8.31215	8.63839	8.65096	8.66023
ENSMUSG00000071532.7	Gm10335	8.02849	8.01365	8.01412	6.93834	6.94171	6.97996	7.59356	7.61004	7.54565	7.18738	7.16839	7.32294
ENSMUSG00000030695.17	Aldoa	9.0464	9.03083	9.07068	8.6188	8.68141	8.49898	8.46361	8.55109	8.5822	8.05493	8.08109	8.15054
ENSMUSG00000059195.11	Gm12715	9.61072	9.6181	9.62857	9.36831	9.32336	9.32361	9.19378	9.22159	9.20828	9.04833	8.97363	8.99377
ENSMUSG00000091971.4	Hspa1a	3.92617	3.87764	3.78782	4.82246	4.73256	4.74073	3.47304	3.59169	3.49238	5.10135	5.01918	5.10729
ENSMUSG00000056116.19	H2-T22	4.66207	4.71384	4.72017	5.36808	5.28921	5.28743	5.33149	5.43574	5.42818	5.73212	5.68442	5.81505
ENSMUSG00000028995.15	Fam126a	6.36918	6.41799	6.33377	7.26618	7.27142	7.28504	6.63899	6.63039	6.63741	7.21311	7.22897	7.08689
ENSMUSG00000034707.8	Gns	8.66898	8.64645	8.6645	8.20228	8.1936	8.2237	8.81329	8.76987	8.78141	8.09583	8.07819	8.05367
ENSMUSG00000109610.2	Gm7432	6.48851	6.47167	6.53759	5.54561	5.50398	5.60608	6.24588	6.25655	6.16915	5.5016	5.50343	5.64813
ENSMUSG00000069117.5	Rps18-ps6	6.58417	6.54652	6.64281	5.41299	5.3246	5.35448	6.04446	5.97543	5.96488	5.43757	5.45339	5.65329
ENSMUSG00000048826.8	Dact2	5.46717	5.47909	5.5906	5.87353	5.84869	5.78581	5.11994	5.11397	5.20471	6.41719	6.43057	6.50574
ENSMUSG00000045038.15	Prkce	5.12101	5.06965	5.19914	4.24131	4.22002	4.27391	5.44255	5.41396	5.31158	3.7096	3.853	3.54138
ENSMUSG00000024143.16	Rhoq	8.26655	8.25229	8.22243	7.87891	7.89286	7.87504	8.15938	8.13569	8.12833	7.64224	7.67827	7.65587
ENSMUSG00000026187.10	Xrcc5	4.88838	5.02587	4.95317	5.55185	5.50855	5.57891	5.2865	5.28643	5.27183	5.87243	5.86535	5.91728
ENSMUSG00000025939.20	Ube2w	6.08359	6.07821	5.92183	5.42107	5.40274	5.42941	5.88787	5.90935	5.834	5.02372	5.06761	5.09132
ENSMUSG00000007080.15	Pole	4.99255	4.90016	4.93985	6.7386	6.76738	6.79635	5.06859	5.37574	5.36958	7.03003	7.07483	6.94374
ENSMUSG00000057541.15	Pus7	6.46653	6.42468	6.44309	6.0609	6.05594	6.0478	6.59128	6.57749	6.49542	5.71929	5.68491	5.67939
ENSMUSG00000021733.12	Slc4a7	7.79823	7.86058	7.81066	8.38231	8.42576	8.4408	7.64076	7.57658	7.57075	8.74482	8.81357	8.60809
ENSMUSG00000012889.9	Podnl1	3.5998	3.44808	3.49185	4.14709	4.05499	4.187	4.07723	4.31016	4.18039	4.9456	4.90703	5.04756
ENSMUSG00000074733.15	Zfp950	5.72531	5.72021	5.64274	5.00792	5.21431	5.23734	4.71383	4.61102	4.58195	4.20119	4.16003	3.92958
ENSMUSG00000027968.12	Larp7	4.44392	4.53929	4.48509	5.38849	5.4716	5.46414	4.72603	4.73037	4.7805	5.46693	5.46721	5.52651
ENSMUSG00000113555.2	Gm10095	5.29159	5.28923	5.3211	4.08745	4.14134	4.09111	4.78766	4.70144	4.68997	4.0745	4.00127	4.22287
ENSMUSG00000020290.15	Xpo1	7.14768	7.1787	7.1186	7.73061	7.83597	7.78676	7.30051	7.43458	7.42097	7.94113	7.9412	7.92229
ENSMUSG00000067274.11	Rplp0	11.2561	11.2356	11.3134	10.203	10.1492	10.0684	10.6809	10.6715	10.6962	10.4009	10.3635	10.5143
ENSMUSG00000031628.10	Casp3	5.96473	6.0143	5.93118	6.3875	6.48609	6.329	5.56803	5.5924	5.58204	6.81083	6.80059	6.87053
ENSMUSG00000005124.11	Ccn4	8.61112	8.65389	8.61097	8.2793	8.29589	8.25484	8.86111	8.87112	8.86012	8.05365	8.04708	8.00234
ENSMUSG00000031451.7	Gas6	4.75327	4.63103	4.6652	6.08963	6.09366	5.90048	5.03421	5.13824	5.01666	5.8385	5.84388	5.8171
ENSMUSG00000051510.14	Mafg	7.17053	7.17495	7.07123	6.43213	6.44558	6.37043	6.91309	6.97242	6.94647	6.31794	6.30505	6.17586
ENSMUSG00000020024.8	Cep83	6.24425	6.18574	6.22226	5.78822	5.79316	5.79266	6.09836	6.09487	6.09651	5.43589	5.50957	5.46587
ENSMUSG00000036006.21	Ripor2	4.51132	4.41469	4.5061	2.97067	2.95513	3.0494	4.67659	4.86085	4.76487	3.10912	3.11865	3.01221
ENSMUSG00000073676.5	Hspe1	6.86722	6.84621	6.89825	6.09624	6.06566	6.18185	6.66054	6.57718	6.61235	5.81587	5.88736	6.01764
ENSMUSG00000034616.18	Ssh3	6.71113	6.65139	6.69099	5.869	5.86124	5.77415	6.44055	6.48031	6.47119	5.88233	5.94529	5.93387
ENSMUSG00000026669.15	Mcm10	4.10567	3.9787	4.06949	5.71534	5.8159	5.84022	4.30285	4.71931	4.59464	6.46464	6.45823	6.45113
ENSMUSG00000020111.16	Micu1	7.64632	7.6249	7.63762	7.27426	7.23967	7.24257	7.77949	7.77154	7.72372	7.01343	6.93181	6.9932
ENSMUSG00000022139.18	Mbnl2	7.77651	7.76173	7.76143	7.50668	7.5249	7.52554	7.64923	7.65294	7.65828	7.14089	7.20098	7.16707
ENSMUSG00000025358.17	Cdk2	6.04604	5.92278	6.0078	6.67769	6.60201	6.66126	5.77494	5.81747	5.8452	6.7672	6.84427	6.81863
ENSMUSG00000029599.14	Ddx54	6.93416	6.96905	6.94591	6.38813	6.41611	6.37816	7.14415	7.14635	7.1611	6.29094	6.31336	6.23826
ENSMUSG00000114551.2	Gm6035	4.62153	4.58526	4.61581	3.2103	3.18363	3.38119	3.90447	3.9524	3.90071	2.97059	3.02831	3.20576
ENSMUSG00000020116.8	Pno1	5.8769	5.78785	5.88756	5.29357	5.35409	5.38757	6.23039	6.09273	6.15037	4.8837	4.88404	4.92487
ENSMUSG00000036986.17	Pml	5.37891	5.46208	5.39728	5.75372	5.78424	5.87836	5.82324	5.9586	5.9814	6.38273	6.38185	6.34773
ENSMUSG00000062758.7	Gm16477	6.63499	6.73788	6.75761	5.85485	5.85274	5.8453	6.2884	6.25119	6.29695	5.82317	5.82656	5.94186
ENSMUSG00000068014.6	Gm14648	5.34156	5.30611	5.36315	4.10607	4.12209	4.13489	4.78449	4.80443	4.79487	4.14884	4.05869	4.2995
ENSMUSG00000018476.8	Kdm6b	7.18339	7.18203	7.06252	6.79346	6.81379	6.75676	6.69904	6.6221	6.62694	6.27882	6.29766	6.14769
ENSMUSG00000022537.19	Tmem44	4.14864	4.17352	4.14464	4.95671	4.88347	4.89655	3.39736	3.30565	3.30123	5.21866	5.27106	5.16946
ENSMUSG00000079139.5	Gm4204	7.40434	7.4659	7.52516	6.83497	6.80801	6.89193	6.92107	6.91906	6.94424	6.73819	6.74518	6.69727
ENSMUSG00000070738.11	Dgkd	6.60914	6.58663	6.55684	5.97617	5.9741	6.00489	6.41234	6.44686	6.33715	5.67251	5.67849	5.4782
ENSMUSG00000035105.6	Egln3	4.89936	5.07861	5.17136	3.78072	3.87394	3.79835	5.58701	5.34298	5.43455	3.43029	3.30206	3.20888
ENSMUSG00000022292.17	Rrm2b	5.17261	5.3243	5.31477	4.83832	4.71982	4.75375	5.00719	5.03235	4.90187	3.93244	4.08582	4.04927
ENSMUSG00000066180.6	Gm10155	5.04393	5.11737	5.08465	3.83007	3.97145	3.94365	4.5261	4.47304	4.40305	3.78543	3.7939	3.94276
ENSMUSG00000052676.17	Zmat1	2.62049	2.69608	2.53554	4.09989	4.11462	4.19179	2.8547	2.92945	2.88398	4.12124	4.20471	4.08367
ENSMUSG00000026335.17	Pam	6.63958	6.5932	6.59296	7.3238	7.33355	7.30673	6.79826	6.77594	6.76667	7.3619	7.34797	7.24777
ENSMUSG00000022602.15	Arc	2.26736	2.35055	2.41633	4.72548	4.75003	4.74725	3.49654	3.48606	3.43426	3.85913	3.97733	3.75918
ENSMUSG00000004383.19	Large1	6.30208	6.36114	6.35515	5.72741	5.71529	5.68692	6.18047	6.13951	6.05212	5.53284	5.53221	5.54884
ENSMUSG00000042759.13	Apobr	4.93821	5.20912	5.05075	3.52583	3.54322	3.58915	3.77378	3.67644	3.4427	2.53304	2.34571	2.05434
ENSMUSG00000030218.3	Mgp	7.94377	7.76977	7.95373	9.03447	8.99702	9.03798	8.49806	8.56235	8.49003	9.13296	9.11591	9.27477
ENSMUSG00000029380.12	Cxcl1	2.16187	2.05628	2.22689	4.17967	4.07515	3.86984	3.62769	3.7325	3.54563	4.10159	4.16428	3.97059
ENSMUSG00000039323.19	Igfbp2	2.61518	2.60975	2.57848	4.40057	4.44038	4.15629	3.87489	4.1063	4.11318	4.29559	4.38176	4.37365
ENSMUSG00000053746.9	Ptrh1	4.72762	4.58652	4.6248	3.67457	3.71507	3.68287	5.0081	5.1021	5.08929	3.05179	3.14182	3.36244
ENSMUSG00000031029.7	Eif3f	8.16749	8.23687	8.20327	7.29789	7.29623	7.25311	7.59598	7.56567	7.63789	7.55079	7.55372	7.58711
ENSMUSG00000020812.19	Snhg16	5.05084	4.98263	5.15727	3.98894	3.95815	3.96059	4.63365	4.64881	4.63452	3.6947	3.54948	3.84389
ENSMUSG00000026956.16	Uap1l1	7.36408	7.31738	7.41823	6.71808	6.7312	6.74675	7.68548	7.61019	7.67571	6.55174	6.53761	6.66043
ENSMUSG00000024222.18	Fkbp5	3.54771	3.36853	3.6207	4.92561	4.96798	4.80988	3.92963	4.11813	4.01841	4.91056	4.96582	4.90578
ENSMUSG00000031672.9	Got2	8.23688	8.24286	8.31907	7.73186	7.6977	7.67516	8.41826	8.40686	8.44221	7.59711	7.59811	7.65444
ENSMUSG00000035842.11	Ddx11	4.26189	4.03131	4.10664	5.34476	5.32784	5.43279	4.28646	4.512	4.37537	5.54015	5.44701	5.44154
ENSMUSG00000031647.11	Mfap3l	3.42844	3.55463	3.34103	4.65559	4.76823	4.84071	3.2236	3.23288	3.06267	4.93613	4.87801	4.82676
ENSMUSG00000058443.6	Rpl10-ps3	7.93872	7.89761	7.96477	7.0517	7.06465	7.00535	7.33497	7.28608	7.30008	7.03411	7.04902	7.21129
ENSMUSG00000074818.14	Pdzd7	5.21454	5.11824	5.16521	2.01777	2.1348	2.61303	4.39188	4.22518	4.49527	0.433432	0.219221	0.675508
ENSMUSG00000031486.16	Adgra2	7.4911	7.44683	7.48146	8.07185	8.04963	8.04539	7.71263	7.69432	7.64248	8.23288	8.21468	8.10407
ENSMUSG00000051517.15	Arhgef39	2.61518	2.48596	2.63551	3.74949	3.4934	3.59156	1.69657	1.66917	1.90394	4.35249	4.47364	4.60199
ENSMUSG00000032562.14	Gnai2	8.19159	8.20829	8.24457	8.63451	8.61553	8.60491	8.08111	8.0607	8.09923	8.84345	8.78551	8.88151
ENSMUSG00000025534.18	Gusb	6.03164	6.12262	6.11195	6.57147	6.59827	6.56945	6.68291	6.66566	6.62075	6.82138	6.79535	6.88645
ENSMUSG00000021660.15	Btf3	8.8894	8.92903	8.92121	8.22551	8.21524	8.21087	8.7506	8.73421	8.73853	8.1906	8.22463	8.32627
ENSMUSG00000031555.16	Adam9	8.28436	8.23126	8.28686	8.0364	8.06454	8.04979	8.04636	8.0691	8.06453	7.69515	7.70185	7.68179
ENSMUSG00000025410.11	Dctn2	8.28258	8.33917	8.34203	7.94921	7.89329	7.95329	8.11535	8.14501	8.15717	7.71329	7.7218	7.69492
ENSMUSG00000078922.10	Tgtp1	0.796315	0.810803	1.09852	1.64607	1.57963	1.79594	4.09102	4.05797	3.99371	3.03414	3.01269	3.07167
ENSMUSG00000035933.6	Cog5	5.75765	5.84985	5.75813	4.95157	4.92421	4.8005	5.69536	5.55495	5.57437	4.72037	4.73396	4.65899
ENSMUSG00000046352.8	Gjb2	6.03861	5.96348	6.03936	6.14805	6.19702	6.21518	6.91478	7.15438	7.11846	4.9194	4.92551	4.92677
ENSMUSG00000026313.17	Hdac4	6.02864	5.97167	5.91032	5.34541	5.32071	5.44621	6.15444	6.202	6.19647	5.04002	5.0547	4.92298
ENSMUSG00000020974.7	Pole2	2.0793	2.2271	2.41633	3.89395	3.87394	3.86185	1.77555	1.86647	1.86257	3.93878	4.08134	4.08876
ENSMUSG00000061167.10	Rpl15-ps3	8.14955	8.06198	8.17075	7.13845	7.10517	7.06358	7.61161	7.58147	7.58067	7.20967	7.23184	7.38441
ENSMUSG00000033059.8	Pygb	5.89512	5.92079	5.95378	6.50026	6.44141	6.36938	6.15033	6.06592	6.00393	6.85884	6.89607	6.76666
ENSMUSG00000042408.14	Zmym6	6.09319	6.07911	6.17145	5.58097	5.61085	5.66527	5.50505	5.40294	5.38354	5.19104	5.23987	5.13625
ENSMUSG00000044477.13	Zfand3	7.04462	7.05188	7.09684	6.63747	6.58994	6.58501	6.97017	6.95202	6.88478	6.39084	6.38549	6.35831
ENSMUSG00000038545.14	Cul7	7.20368	7.14371	7.12291	7.63117	7.60718	7.62704	6.93452	6.92485	6.97077	7.89593	7.84347	7.7882
ENSMUSG00000021569.11	Trip13	3.94325	3.84442	3.89999	5.09668	5.24063	5.11237	4.20479	4.47435	4.45548	5.25531	5.24054	5.35548
ENSMUSG00000080859.2	Rpl10-ps1	7.74337	7.72555	7.75705	6.85046	6.87961	6.82233	7.15302	7.09253	7.10522	6.8295	6.84515	7.01809
ENSMUSG00000037820.16	Tgm2	6.14023	6.07777	6.13101	5.11058	5.17893	4.97553	5.71219	5.81332	5.71584	5.09782	5.10493	5.15173
ENSMUSG00000009647.14	Mcu	6.67708	6.63448	6.64186	6.31702	6.3432	6.42841	6.77549	6.78153	6.8206	5.88274	5.93993	5.84543
ENSMUSG00000020097.15	Sgpl1	8.3068	8.36712	8.34698	7.65323	7.68742	7.6923	8.20388	8.16144	8.21943	7.75542	7.75105	7.73537
ENSMUSG00000039382.13	Wdr45	5.60302	5.57081	5.61207	5.18323	5.15946	5.20295	5.82324	5.67425	5.79219	4.65353	4.66368	4.67374
ENSMUSG00000099481.7	Xndc1	3.20238	3.24031	3.25761	4.27597	4.4175	4.47201	3.69695	3.81375	3.70627	4.52672	4.6486	4.57686
ENSMUSG00000027775.10	Mfsd1	7.11673	7.20245	7.18545	6.54529	6.5775	6.4635	7.02619	6.96284	6.97417	6.43748	6.43644	6.42454
ENSMUSG00000008892.13	Vdac3	7.64289	7.64975	7.69575	7.25058	7.23227	7.29546	7.81108	7.78989	7.77075	6.95384	6.93761	7.04321
ENSMUSG00000026955.14	Sapcd2	1.71173	1.06266	1.69427	3.40827	3.26955	3.22481	1.95215	1.88242	1.98329	3.99613	4.14003	3.96691
ENSMUSG00000084416.4	Rpl10a-ps1	8.62731	8.55932	8.66357	7.61597	7.5708	7.52839	8.29931	8.28478	8.3243	7.51451	7.57834	7.73198
ENSMUSG00000063015.13	Ccni	8.11004	8.21033	8.17611	7.7459	7.76736	7.75272	7.83445	7.77968	7.81899	7.49811	7.53539	7.54869
ENSMUSG00000022906.16	Parp9	4.14496	4.29377	4.24634	4.4341	4.34785	4.42396	5.48233	5.53743	5.55697	5.24319	5.26448	5.24965
ENSMUSG00000080885.2	Rpl10-ps6	7.38474	7.36226	7.42413	6.529	6.51928	6.49	6.80298	6.75444	6.75456	6.48779	6.49805	6.66839
ENSMUSG00000081453.2	Gm6767	5.86854	5.9158	5.90506	4.72748	4.68292	4.79631	5.1191	5.09099	5.1256	4.78688	4.69632	4.93055
ENSMUSG00000041132.12	N4bp2l1	3.66045	3.60509	3.57372	2.17882	2.31768	2.41422	2.90241	3.0473	2.97609	1.70036	1.53801	1.35377
ENSMUSG00000059851.16	Kmt5c	4.71275	4.5599	4.62352	5.23981	5.11598	5.17741	3.98238	4.17912	4.19713	5.78233	5.81129	5.79495
ENSMUSG00000018821.4	Avpi1	6.23691	6.19689	6.24034	5.28134	5.09867	5.10815	6.6792	6.66191	6.73836	5.30338	5.24188	5.3335
ENSMUSG00000083011.2	Gm12816	4.48094	4.4661	4.54721	3.20743	3.15478	3.30364	3.75874	3.69236	3.72486	3.0282	2.92527	3.15167
ENSMUSG00000030309.17	Caprin2	3.87591	3.836	3.76477	4.90095	4.91478	4.9418	4.22212	4.07888	4.05192	5.00722	4.95931	4.92392
ENSMUSG00000023947.9	Nfkbie	4.28887	4.46747	4.50471	5.4377	5.38608	5.49419	4.80241	4.8976	4.83286	5.66584	5.52837	5.59129
ENSMUSG00000047414.7	Flrt2	4.21871	4.29069	4.16239	5.35905	5.43608	5.43009	4.62657	4.47304	4.64309	5.51598	5.48033	5.32849
ENSMUSG00000007050.18	Lsm2	4.50989	4.27985	4.40386	5.46919	5.43008	5.47401	4.6313	4.8848	4.89778	5.72251	5.77286	5.82169
ENSMUSG00000029722.16	Agfg2	3.92832	3.91011	3.84829	4.51642	4.46056	4.52738	3.72818	3.49387	3.63188	5.05323	5.17958	5.11728
ENSMUSG00000026069.16	Il1rl1	9.87425	9.99018	9.89339	10.2793	10.2999	10.3967	10.5816	10.528	10.5226	10.65	10.6869	10.6419
ENSMUSG00000030122.13	Ptms	8.45017	8.3879	8.45993	9.16605	9.12684	9.14427	7.81692	7.81555	7.88621	9.05464	9.04443	9.11923
ENSMUSG00000022421.21	Nptxr	6.21114	6.16613	6.10554	6.95405	6.83167	6.94421	5.62838	5.69923	5.61916	6.95031	6.9804	6.94187
ENSMUSG00000066607.6	Insyn1	5.96264	5.99125	5.97403	5.59806	5.52386	5.57952	5.80401	5.79974	5.82756	5.23613	5.24789	5.22058
ENSMUSG00000039509.9	Nup133	5.77862	5.76584	5.75346	6.26724	6.21947	6.20534	5.55129	5.65408	5.54786	6.52302	6.49242	6.50193
ENSMUSG00000003970.10	Rpl8	10.8184	10.7763	10.8453	9.85089	9.79255	9.82054	10.4475	10.4732	10.4458	10.0295	10.0172	10.1709
ENSMUSG00000029822.16	Osbpl3	7.44781	7.47101	7.47082	7.88846	7.86397	7.84342	7.64369	7.63334	7.51593	8.17926	8.18946	8.11585
ENSMUSG00000039637.16	Coro7	5.17352	5.06695	5.23145	4.38922	4.41263	4.33292	4.7205	4.59297	4.76374	3.96075	4.03104	3.93713
ENSMUSG00000050812.19	Ecpas	7.43881	7.54719	7.49431	6.92639	6.95975	7.00603	7.20368	7.24389	7.1768	6.74838	6.73284	6.61383
ENSMUSG00000055531.13	Cpsf6	8.01681	7.98844	7.98785	7.34289	7.39157	7.4213	7.71179	7.69869	7.68241	7.32472	7.32918	7.19408
ENSMUSG00000027423.16	Snx5	7.2815	7.31017	7.25576	6.83845	6.85539	6.8008	7.14167	7.16989	7.12787	6.64677	6.63521	6.68136
ENSMUSG00000020609.15	Apob	2.7811	2.85881	2.6557	3.3754	3.59567	3.46272	5.04044	5.02338	4.90697	4.48401	4.48274	4.24127
ENSMUSG00000062328.9	Rpl17	5.59898	5.67251	5.58271	4.31382	4.31433	4.35729	4.99898	4.88677	4.85412	4.33457	4.45411	4.56717
ENSMUSG00000111964.2	Gm8942	5.96368	5.75135	5.94201	4.52451	4.38434	4.39378	5.36664	5.38906	5.28989	4.70185	4.64353	4.7624
ENSMUSG00000037347.8	Chst7	2.85065	2.46971	2.68547	4.4524	4.35421	4.22021	2.95237	2.90624	3.04058	4.44223	4.37933	4.40663
ENSMUSG00000025950.17	Idh1	4.54667	4.68949	4.50332	5.53706	5.31486	5.37218	4.44654	4.30868	4.26856	5.96501	5.84653	5.87911
ENSMUSG00000081087.2	Rps15a-ps7	5.37341	5.35632	5.37081	4.12596	4.18336	4.08769	4.76096	4.79813	4.73537	4.35368	4.2184	4.38886
ENSMUSG00000022554.8	Hgh1	4.89168	4.85083	4.93366	4.47883	4.41263	4.5611	5.50311	5.59179	5.61729	3.78014	3.76622	3.84989
ENSMUSG00000020372.16	Rack1	10.5511	10.5202	10.5776	9.58705	9.54082	9.54096	10.0173	10.008	10.0332	9.81769	9.81263	9.94743
ENSMUSG00000066407.4	Gm10263	6.29959	6.19976	6.26807	5.17884	5.10094	5.17419	5.47117	5.50175	5.53409	5.34336	5.25522	5.42487
ENSMUSG00000019866.16	Crybg1	3.92832	4.01087	3.87437	5.1075	5.06883	5.11741	5.12665	5.12741	5.10889	5.07857	5.00029	4.92203
ENSMUSG00000031644.20	Nek1	5.42067	5.54519	5.43209	4.88487	4.98282	4.89753	5.2722	5.30133	5.26391	4.5225	4.50077	4.48592
ENSMUSG00000025085.17	Ablim1	6.35847	6.43204	6.32355	7.02505	7.02317	7.09161	6.62603	6.63068	6.57602	7.29954	7.26354	7.12248
ENSMUSG00000001962.9	Fam50a	6.76014	6.83489	6.77155	6.07278	6.05867	6.08346	6.36275	6.28869	6.31815	6.13337	6.09263	6.10605
ENSMUSG00000035150.16	Eif2s3x	7.63438	7.64539	7.62679	7.22064	7.25079	7.22379	7.37849	7.32508	7.3591	7.06722	7.07106	7.04605
ENSMUSG00000041120.7	Nbl1	5.70918	5.65585	5.68019	6.57482	6.40084	6.4848	5.93689	6.04394	6.05074	6.52408	6.57239	6.57749
ENSMUSG00000039840.9	Epg5	6.71082	6.68139	6.69313	6.00166	6.09366	6.10097	7.00859	7.03216	6.91545	5.66632	5.66156	5.43623
ENSMUSG00000005481.19	Ddx39a	7.09014	7.02896	7.18935	6.55011	6.48406	6.58955	6.90311	6.90937	6.94548	6.29033	6.32669	6.32311
ENSMUSG00000034459.9	Ifit1	4.54528	4.36284	4.43194	2.40611	2.40355	2.57442	7.72166	7.85004	7.81276	2.9138	2.88808	3.15167
ENSMUSG00000023963.11	Cyp39a1	2.5102	2.77754	2.60468	3.7115	3.48184	3.51718	3.512	3.32328	3.33792	4.36313	4.38904	4.3184
ENSMUSG00000079942.6	Rpl28-ps3	5.76907	5.70584	5.80239	4.58326	4.59009	4.58921	5.23465	5.28568	5.27341	4.65064	4.60654	4.8298
ENSMUSG00000058905.6	Gm10051	5.8098	5.69131	5.83264	4.58105	4.49549	4.48378	5.27371	5.21738	5.32991	4.55691	4.58452	4.75601
ENSMUSG00000026646.17	Suv39h2	2.88199	2.87123	2.87394	3.95853	4.15159	4.04067	3.30868	3.34933	3.57667	4.41635	4.37323	4.44946
ENSMUSG00000106037.2	Gm4332	7.83229	7.74438	7.8439	6.54358	6.44231	6.49679	7.32716	7.39431	7.29834	6.58268	6.48423	6.72913
ENSMUSG00000054855.14	Rnd1	6.12815	6.13941	6.11012	5.64813	5.74945	5.6351	6.33984	6.50531	6.49067	5.21344	5.16764	5.24434
ENSMUSG00000038732.16	Mboat1	2.11742	1.76819	2.0009	3.72762	3.61486	3.62501	2.58433	2.6322	2.39086	3.80984	3.86	3.9521
ENSMUSG00000023944.15	Hsp90ab1	11.4795	11.6017	11.5211	10.8458	10.8597	10.8979	10.9975	10.9509	10.9392	10.8853	10.8706	10.8182
ENSMUSG00000118665.1	Lin54	4.56058	4.52232	4.59112	5.45171	5.5131	5.5783	5.00081	5.17431	5.04652	5.58984	5.60746	5.55559
ENSMUSG00000022367.8	Has2	1.76073	1.72321	1.43863	3.35997	3.31718	2.99562	2.10269	2.40267	2.4535	4.07306	4.00917	3.90863
ENSMUSG00000032180.12	Tmed1	4.19573	4.09978	4.21096	4.89204	4.90095	4.88279	4.6407	4.83445	4.73766	5.25277	5.29192	5.408
ENSMUSG00000005360.15	Slc1a3	3.84443	3.89802	4.03136	4.33239	4.46527	4.41715	4.30876	4.22518	4.31837	5.03855	5.12613	5.14442
ENSMUSG00000033379.14	Atp6v0b	7.16075	7.08448	7.22758	6.39603	6.28549	6.26793	6.99513	6.97265	7.03596	6.36372	6.35019	6.37333
ENSMUSG00000018001.19	Cyth3	6.60914	6.57212	6.64091	7.27734	7.23967	7.3281	7.04668	7.13849	7.02849	7.33391	7.31332	7.30136
ENSMUSG00000050565.17	Tor1aip2	7.43655	7.51736	7.44077	7.03176	7.03568	7.05899	7.59552	7.60644	7.61471	6.78666	6.79626	6.86979
ENSMUSG00000036752.5	Tubb4b	5.95949	5.99976	6.13101	7.86554	7.79998	7.93317	6.39681	6.62979	6.60233	8.2085	8.17865	8.29597
ENSMUSG00000035064.18	Eef2k	6.0396	6.10651	6.08939	5.25378	5.38918	5.32789	5.95114	5.96095	5.90195	5.2342	5.27368	5.28259
ENSMUSG00000024736.16	Tmem132a	6.70238	6.71049	6.71434	7.19062	7.17596	7.11492	6.8186	6.94017	6.89968	7.40632	7.4125	7.36898
ENSMUSG00000035242.16	Oaz1	7.93779	7.87723	7.95996	8.38612	8.26265	8.2768	7.70284	7.68199	7.69233	8.64283	8.61306	8.73212
ENSMUSG00000040118.16	Cacna2d1	6.13141	6.22176	6.16354	5.87625	5.85856	5.82489	5.82066	5.75334	5.81515	5.35939	5.41171	5.2774
ENSMUSG00000023055.11	Calcoco1	7.58473	7.67108	7.60683	7.07885	7.03429	7.04538	7.00382	6.96518	6.99873	7.00401	7.00864	6.95656
ENSMUSG00000024053.12	Emilin2	2.35931	2.23993	2.07023	4.59649	4.53743	4.47332	2.45167	2.73238	2.64624	4.13096	4.12703	3.90671
ENSMUSG00000061315.15	Naca	9.19668	9.19523	9.25615	8.50601	8.49966	8.51499	8.89387	8.82867	8.85525	8.58578	8.56118	8.65773
ENSMUSG00000022300.11	Dcaf13	6.51124	6.53095	6.5122	5.96771	5.97162	5.96766	6.62069	6.63245	6.6086	5.90881	5.88907	5.91966
ENSMUSG00000022295.9	Atp6v1c1	6.99147	7.02387	7.03845	6.48227	6.44826	6.37956	6.80716	6.80578	6.78865	6.2735	6.27819	6.37402
ENSMUSG00000082082.2	Gm13230	5.08971	5.15342	5.09947	4.57883	4.76823	4.76772	4.74905	4.62175	4.65162	3.88398	3.81207	3.98704
ENSMUSG00000032009.9	Sesn3	5.85337	5.95085	5.89925	6.93335	6.90148	6.97603	5.49665	5.60025	5.51686	6.8923	6.86899	6.69644
ENSMUSG00000003813.16	Rad23a	6.62146	6.54846	6.59394	6.21139	6.23506	6.36089	6.94855	7.01237	7.07293	5.70076	5.6913	5.78349
ENSMUSG00000022032.15	Scara5	3.00909	2.7464	2.93717	5.05737	4.99345	4.9681	3.23606	3.07878	3.31356	4.2894	4.41066	4.38472
ENSMUSG00000052504.8	Epha3	1.11546	1.20032	0.73088	3.72562	3.91063	3.87184	1.58405	1.67834	1.5128	3.2585	3.26298	3.15167
ENSMUSG00000047676.7	Rpsa-ps10	8.5471	8.59112	8.60498	7.5681	7.50304	7.57038	7.96854	7.92522	7.95561	7.75217	7.80657	7.93223
ENSMUSG00000052459.14	Atp6v1a	7.63733	7.68008	7.68551	7.09989	7.02953	7.07031	7.58931	7.43644	7.46328	6.94619	6.93947	6.88083
ENSMUSG00000025218.7	Poll	3.69363	3.63454	3.82396	4.41557	4.39671	4.35871	3.84874	4.00797	4.06839	4.9234	4.98916	5.0493
ENSMUSG00000026576.13	Atp1b1	3.32473	3.35974	3.30313	4.74738	4.89224	4.94559	4.21427	4.37359	4.35165	4.63511	4.72056	4.55251
ENSMUSG00000028560.12	Usp1	5.18164	5.25883	5.31318	6.0169	6.04026	6.03852	5.46457	5.593	5.51753	6.09273	6.05232	6.09597
ENSMUSG00000020205.9	Phlda1	4.03971	4.07134	4.22623	5.49531	5.5721	5.35946	4.60871	4.79813	4.79707	5.44816	5.49615	5.61088
ENSMUSG00000007038.6	Neu1	6.21817	6.19648	6.27298	5.22711	5.13456	5.13907	5.89033	5.77272	5.87775	5.34515	5.35523	5.43423
ENSMUSG00000022817.16	Itgb5	7.98778	7.97951	8.04327	8.33813	8.33635	8.24767	7.88195	7.91641	7.87559	8.64598	8.59291	8.62483
ENSMUSG00000054545.18	Ugt1a6a	4.30877	4.21635	4.10297	2.54901	2.39864	2.63665	2.95614	3.21725	3.19523	2.06153	2.39474	2.08182
ENSMUSG00000003778.15	Brd8	6.08552	6.06385	6.03792	6.62031	6.6324	6.66471	6.25433	6.32342	6.2954	6.72495	6.73973	6.67658
ENSMUSG00000093686.2	Gm4705	4.78084	4.80516	4.8364	3.5373	3.54099	3.5044	4.35378	4.36935	4.22841	3.47023	3.50774	3.69388
ENSMUSG00000055799.14	Tcf7l1	3.98096	4.0874	4.13208	5.34214	5.23237	5.30449	3.90643	3.85676	3.8508	5.19965	5.17748	5.06316
ENSMUSG00000048285.10	Frmd6	7.13589	7.21915	7.08526	7.73448	7.76843	7.77057	7.5004	7.52957	7.47671	7.86631	7.84314	7.78285
ENSMUSG00000024659.16	Anxa1	8.34997	8.39768	8.4033	8.89861	8.89781	8.87287	8.02384	7.93898	8.00339	8.95203	8.96503	9.02353
ENSMUSG00000035873.9	Pawr	6.22822	6.18283	6.24576	5.83081	5.81175	5.7188	6.53438	6.46451	6.47325	5.44148	5.38708	5.48336
ENSMUSG00000030096.9	Slc6a6	7.33627	7.44493	7.32339	7.81152	7.75588	7.74432	7.07991	7.06812	7.11428	8.17138	8.19215	8.04747
ENSMUSG00000066362.6	Rps13-ps1	6.79702	6.84831	6.80697	5.93512	5.8333	5.98064	6.28428	6.24002	6.33753	5.81931	5.76262	5.9743
ENSMUSG00000040268.18	Plekha1	6.89546	6.92405	6.92215	7.63117	7.68591	7.66083	7.15691	7.14552	7.10078	7.55105	7.5548	7.47902
ENSMUSG00000031070.16	Mrgprf	4.38106	4.2876	4.25795	5.05897	5.12567	4.87883	4.08586	4.06847	3.95092	5.49623	5.47122	5.49491
ENSMUSG00000002885.15	Adgre5	4.79149	4.74004	4.69721	5.80683	5.72856	5.73092	4.65238	4.47698	4.53926	5.68057	5.79403	5.73183
ENSMUSG00000100865.3	Gm9320	5.32536	5.18362	5.33916	3.99394	3.79389	3.82738	4.76956	4.80443	4.64187	3.96075	4.02949	4.09888
ENSMUSG00000021185.17	Dglucy	2.49291	2.56965	2.46863	3.613	3.43702	3.57943	3.11305	3.17902	3.09875	3.99004	4.14578	3.98704
ENSMUSG00000041528.16	Rnf123	6.34889	6.31186	6.29326	5.64654	5.71677	5.6427	6.15854	6.15764	6.1923	5.58732	5.4135	5.44683
ENSMUSG00000072941.6	Sod3	2.92561	2.59484	2.78965	3.88858	3.88452	3.76445	3.30572	3.66266	3.68507	4.70929	4.80189	4.90193
ENSMUSG00000028081.7	Rps3a1	9.61551	9.64559	9.8206	8.48794	8.49572	8.48066	9.06351	9.03479	9.06214	8.63211	8.6407	8.76203
ENSMUSG00000045098.20	Kmt5b	6.34769	6.38913	6.29205	5.95878	5.99337	5.93089	6.09794	6.08069	5.97171	5.53702	5.57751	5.4782
ENSMUSG00000021662.12	Arhgef28	5.74127	5.81918	5.80748	4.92561	5.00965	4.91694	5.52487	5.31167	5.35474	4.76564	4.74251	4.78033
ENSMUSG00000114184.2	Gm7143	5.71975	5.68546	5.69612	4.75428	4.73549	4.71101	5.4304	5.41259	5.54786	4.7763	4.81005	4.84592
ENSMUSG00000095427.3	Rps2-ps6	6.2054	6.23383	6.19665	5.251	5.24405	5.13824	5.86096	5.94396	5.97559	5.20689	5.1456	5.3604
ENSMUSG00000062997.7	Rpl35	8.6611	8.59892	8.70806	7.534	7.48215	7.51443	8.24657	8.22945	8.18931	7.76024	7.68999	7.90123
ENSMUSG00000031447.8	Lamp1	10.6472	10.6878	10.7135	10.1621	10.1629	10.1586	10.5282	10.4556	10.4774	10.0515	10.0719	10.1344
ENSMUSG00000029718.15	Pcolce	8.78824	8.7202	8.77499	9.56473	9.53356	9.52969	8.94281	8.94321	8.95667	9.33022	9.32832	9.42547
ENSMUSG00000047675.16	Rps8	9.36303	9.362	9.39709	8.39356	8.37367	8.37835	8.79353	8.78619	8.81338	8.65117	8.67212	8.80711
ENSMUSG00000028671.17	Gale	1.71173	1.46361	1.23898	2.69139	2.64253	2.66908	1.98944	1.79245	1.88753	3.51121	3.65991	3.5586
ENSMUSG00000045954.8	Cavin2	7.31756	7.36006	7.24038	7.82819	7.82925	7.88147	8.42695	8.28431	8.2853	8.06148	8.11368	8.04486
ENSMUSG00000038482.12	Tfdp1	7.51236	7.49913	7.51777	7.91278	7.91324	7.9067	7.56234	7.61943	7.63651	8.03814	8.08081	8.07914
ENSMUSG00000032743.16	Katnip	5.30569	5.32806	5.33369	4.71136	4.63673	4.67952	5.01625	4.99249	4.95795	4.42991	4.45988	4.34841
ENSMUSG00000058809.9	Hspd1-ps3	6.21729	6.28193	6.18671	5.54334	5.61668	5.73694	6.06818	6.04083	6.07313	5.3805	5.30609	5.37367
ENSMUSG00000025212.18	Sfxn3	7.52145	7.49763	7.47082	7.15624	7.25147	7.25769	7.14622	7.08156	7.18459	6.83949	6.78619	6.81352
ENSMUSG00000023367.15	Tmem176a	4.98123	5.05339	5.11505	5.56031	5.50112	5.38826	5.48495	5.51906	5.49807	5.95018	6.02805	6.10521
ENSMUSG00000023977.16	Ubr2	8.27796	8.21521	8.20851	7.97781	7.96192	8.065	8.08714	8.10012	8.08018	7.55105	7.49126	7.37212
ENSMUSG00000024056.11	Ndc80	4.04763	4.009	4.03136	5.64972	5.66555	5.79319	4.1266	4.52982	4.46518	5.88151	5.97341	5.87519
ENSMUSG00000035049.5	Rrp12	5.49423	5.37461	5.36698	5.1781	5.13235	5.11825	6.066	6.14365	6.10141	4.55999	4.50747	4.46519
ENSMUSG00000078851.5	H2aw	3.66045	3.41735	3.84829	2.41111	2.35366	2.44129	2.71475	2.46224	2.51888	1.52608	1.43862	1.53372
ENSMUSG00000031309.16	Rps6ka3	7.1219	7.16573	7.14406	6.8011	6.83394	6.7707	7.0095	7.00874	6.94597	6.42314	6.51644	6.37715
ENSMUSG00000025921.8	Rdh10	4.56885	4.52364	4.51442	5.28679	5.38111	5.33296	4.82321	4.75764	4.87404	5.41785	5.42475	5.46782
ENSMUSG00000055301.9	Adh7	4.96981	4.99025	5.02672	4.70324	4.74713	4.89459	5.57724	5.46714	5.48994	3.94193	3.96601	3.93713
ENSMUSG00000063531.8	Sema3e	2.28756	2.20764	2.50804	3.86328	3.74441	3.7815	2.88668	3.01873	2.90451	4.09451	3.9741	3.91819
ENSMUSG00000029177.10	Cenpa	5.34317	5.1104	5.21113	7.20346	7.13446	7.24449	5.38074	5.68168	5.54132	7.30966	7.30051	7.32474
ENSMUSG00000038260.11	Trpm4	3.40089	3.21454	3.21402	4.31782	4.29728	4.30224	3.47829	3.53733	3.48148	4.53929	4.50636	4.43621
ENSMUSG00000022844.9	Pdia5	5.23723	5.24855	5.22809	5.99002	5.9811	5.90826	5.84985	6.06505	5.93326	6.17893	6.11694	6.24777
ENSMUSG00000032264.10	Zw10	5.23636	5.2034	5.18619	5.64601	5.61668	5.69706	5.32858	5.56857	5.47355	6.18661	6.1788	6.11022
ENSMUSG00000118353.2	Nsa2-ps1	5.40458	5.35115	5.44737	4.44998	4.51718	4.47856	4.96288	4.91321	4.89676	4.48618	4.29402	4.32847
ENSMUSG00000026202.14	Tuba4a	4.90045	4.82552	4.92329	5.30369	5.15145	5.2132	5.12498	5.33069	5.33899	5.92006	5.99105	6.04539
ENSMUSG00000116835.2	Gm49594	7.34654	7.2691	7.33908	6.32333	6.32033	6.27997	6.82532	6.81021	6.80758	6.45223	6.44199	6.6337
ENSMUSG00000019188.17	H13	7.55985	7.59557	7.65214	7.23322	7.19433	7.14858	7.84758	7.7883	7.7859	6.88452	6.87094	6.97523
ENSMUSG00000079555.3	Haus3	4.1796	4.20984	4.26124	5.10827	5.17175	5.22649	4.47837	4.45582	4.46795	5.14518	5.12686	5.21206
ENSMUSG00000083496.2	Gm11263	5.54825	5.60468	5.56481	4.36237	4.34274	4.42938	4.90062	4.91709	4.92818	4.62728	4.56965	4.72693
ENSMUSG00000078126.5	Rpl23a-ps3	8.18342	8.23367	8.19747	7.204	7.15954	7.19902	7.81446	7.76336	7.71503	7.43266	7.34766	7.54191
ENSMUSG00000015850.12	Adamtsl4	4.58527	4.71728	4.47234	6.29758	6.20864	6.10012	5.06598	5.2939	5.30619	6.80867	6.78159	6.7053
ENSMUSG00000035783.10	Acta2	11.5477	11.5363	11.5868	11.2546	11.2291	11.2169	11.2028	11.1892	11.2364	10.928	10.9022	11.0118
ENSMUSG00000024665.9	Fads2	7.24624	7.26812	7.25307	7.5958	7.56902	7.55388	7.29308	7.38385	7.40755	7.89532	7.84181	7.88096
ENSMUSG00000082064.4	Rpl5-ps2	4.78084	4.62493	4.78577	3.28844	3.26416	3.30364	4.13661	4.1694	4.16175	3.46584	3.24704	3.50631
ENSMUSG00000074794.11	Arrdc3	3.5252	3.60012	3.41397	5.6613	5.58622	5.64445	4.09616	4.3651	4.37096	4.80521	4.92967	4.8135
ENSMUSG00000021595.19	Nsun2	7.66591	7.72398	7.63317	7.24971	7.29772	7.24757	7.77229	7.8228	7.78147	7.08786	7.0784	7.04147
ENSMUSG00000104960.2	Snhg8	5.95844	5.88754	5.98354	5.1737	5.10998	5.20453	5.37441	5.26378	5.23502	5.01174	4.99791	5.08963
ENSMUSG00000044906.7	4930503L19Rik	4.86951	4.96825	4.88211	5.61765	5.54901	5.61859	5.24239	5.27967	5.26073	5.69375	5.77841	5.73562
ENSMUSG00000024078.8	Ttc27	5.73821	5.76529	5.83374	5.13947	5.21361	5.19422	5.94356	5.94111	5.92222	5.02967	5.01134	5.01317
ENSMUSG00000040952.17	Rps19	8.84756	8.82291	8.87284	7.85858	7.79939	7.82388	8.06187	8.05532	8.02874	8.22123	8.07819	8.22648
ENSMUSG00000030157.6	Clec2d	5.44786	5.41265	5.51317	4.69711	4.68997	4.75699	5.65183	5.61584	5.67101	4.40494	4.3597	4.56959
ENSMUSG00000033952.15	Aspm	4.36214	4.31817	4.33978	6.02304	6.07184	6.06356	4.46916	4.79813	4.62093	6.30328	6.29378	6.06446
ENSMUSG00000033793.13	Atp6v1h	6.44683	6.3732	6.4983	5.84057	5.81683	5.76561	6.15772	6.07159	6.06312	5.62023	5.66805	5.70115
ENSMUSG00000021556.13	Golm1	3.89579	3.76676	3.85267	4.79691	4.89136	4.91984	4.73154	4.78441	4.6613	4.91378	4.96338	4.84892
ENSMUSG00000027496.16	Aurka	4.36689	4.12938	4.31143	5.62681	5.5595	5.58984	4.40436	4.75656	4.73078	6.08418	6.05194	6.09934
ENSMUSG00000005354.17	Txn2	7.35693	7.32699	7.39627	6.84354	6.85919	6.84961	7.64047	7.67399	7.74123	6.66049	6.68263	6.7579
ENSMUSG00000066357.7	Wdr6	6.92988	7.01922	6.98134	7.35607	7.33821	7.34665	6.47941	6.41055	6.40501	7.59912	7.5839	7.56598
ENSMUSG00000098274.8	Rpl24	8.52476	8.49697	8.55496	7.68375	7.66867	7.72874	8.09368	8.10161	8.10667	7.91273	7.83916	7.96857
ENSMUSG00000022015.9	Tnfsf11	0.282331	0.145225	0.153493	2.25863	2.42786	2.17067	1.03255	1.11578	0.701644	2.62239	2.79617	2.78024
ENSMUSG00000110981.2	Gm35940	0.814993	1.16039	1.09852	2.90487	3.02054	2.85371	2.01136	1.68744	1.52345	3.34218	3.39175	3.3198
ENSMUSG00000027108.16	Ola1	6.66683	6.72795	6.71675	6.17915	6.19135	6.13495	6.58398	6.55994	6.50419	6.05164	6.02766	6.08328
ENSMUSG00000097039.9	Pvt1	5.87412	5.93565	5.89607	5.4161	5.43908	5.60069	6.276	6.37083	6.35814	5.01399	4.98756	5.04407
ENSMUSG00000028020.17	Glrb	4.03374	4.00524	4.08633	2.80207	2.97836	3.03881	4.28945	4.27586	4.29834	2.53304	2.45147	2.68488
ENSMUSG00000030790.16	Adm	3.32147	3.37436	3.34414	4.84664	4.9225	4.85286	4.70152	4.57468	4.7111	4.38535	4.4816	4.39023
ENSMUSG00000031659.14	Adcy7	5.45383	5.42042	5.35391	6.18828	6.14919	6.15798	5.23697	5.17188	5.16952	6.21594	6.24981	6.1173
ENSMUSG00000030654.10	Arl6ip1	6.66329	6.64748	6.67501	7.1193	7.07758	7.15615	6.36984	6.47933	6.48386	7.33901	7.2931	7.36112
ENSMUSG00000032393.16	Dpp8	7.39952	7.49094	7.39458	6.99374	7.02257	6.97603	6.98939	7.02005	7.02498	6.75243	6.75952	6.62058
ENSMUSG00000022336.4	Eif3e	9.40477	9.43778	9.43975	8.83005	8.87936	8.91083	9.25162	9.19366	9.19678	8.83822	8.84379	8.89827
ENSMUSG00000014786.9	Slc9a5	5.51007	5.36513	5.34539	5.63804	5.68736	5.65026	5.04044	5.1021	5.17545	6.24244	6.25845	6.29623
ENSMUSG00000023923.11	Tbc1d5	6.11266	6.18988	6.1507	5.73041	5.7388	5.6251	5.82169	5.8242	5.84785	5.39094	5.3895	5.27443
ENSMUSG00000061848.6	Gm5805	5.31228	5.22373	5.33055	3.99394	3.93289	4.07045	4.75555	4.79076	4.80364	4.21693	4.28624	4.35828
ENSMUSG00000059060.16	Rad51b	1.00592	1.07704	1.17046	3.02058	3.02692	3.12147	1.80094	1.88242	1.8113	3.01926	2.88808	3.13208
ENSMUSG00000040488.19	Ltbp4	7.77173	7.69501	7.72978	7.33962	7.3313	7.18867	6.60396	6.60147	6.56574	6.90247	6.89351	6.73076
ENSMUSG00000060038.15	Dhps	5.44186	5.39627	5.48029	4.71339	4.63464	4.64267	5.66283	5.78603	5.62844	4.42314	4.29789	4.48592
ENSMUSG00000024228.13	Nudt12	3.55606	3.65624	3.83728	4.63758	4.70994	4.74508	4.09616	4.07021	4.07565	4.92898	4.93631	4.80939
ENSMUSG00000028706.15	Nsun4	4.63605	4.72984	4.72972	4.31249	4.29596	4.25114	5.15974	5.11228	5.16782	3.70031	3.78105	3.64405
ENSMUSG00000031310.17	Zmym3	5.72716	5.71792	5.76512	6.29893	6.28815	6.31808	5.46589	5.43843	5.50077	6.40379	6.43028	6.34738
ENSMUSG00000004891.17	Nes	5.40072	5.49189	5.45962	6.75196	6.8177	6.84987	6.02124	6.11357	6.08397	6.92599	6.89841	6.65501
ENSMUSG00000033751.6	Gadd45gip1	5.59763	5.625	5.66221	5.93988	5.87722	5.84631	5.73816	5.74954	5.8211	6.32552	6.32574	6.37715
ENSMUSG00000017144.9	Rnd3	7.51486	7.52606	7.54288	8.13022	8.14878	8.11135	8.019	8.05521	7.94636	8.10467	8.08577	8.14638
ENSMUSG00000019558.15	Slc6a8	8.16089	8.1517	8.16515	7.49657	7.50347	7.53751	7.98698	7.95238	7.98266	7.58188	7.61579	7.66172
ENSMUSG00000018567.15	Gabarap	8.3036	8.30093	8.34572	7.79918	7.75011	7.78742	8.1247	8.06387	8.07815	7.6076	7.64598	7.75244
ENSMUSG00000067038.7	Rps12-ps3	8.70447	8.64276	8.76312	7.5077	7.42381	7.47092	7.80338	7.77074	7.7035	7.65409	7.5964	7.80543
ENSMUSG00000061684.7	Rpl21-ps8	5.22069	5.28537	5.29318	4.08433	4.09957	4.19974	4.77597	4.68563	4.66371	3.97624	3.97893	4.23822
ENSMUSG00000024892.18	Pcx	2.84611	2.9436	3.05207	3.71353	3.73859	3.7009	3.9392	3.95993	4.14976	4.36667	4.25736	4.33277
ENSMUSG00000049866.13	Arl4c	5.96577	6.00682	5.96039	6.75491	6.73462	6.70771	6.29213	6.34624	6.23386	6.65087	6.61051	6.6197
ENSMUSG00000019303.15	Psmc3ip	2.1979	2.1408	1.91136	3.65364	3.75598	3.7666	2.59888	2.5397	2.87152	3.82532	3.94641	4.03879
ENSMUSG00000024037.14	Wdr4	5.78929	5.72422	5.86389	5.3124	5.38298	5.30891	5.99855	6.06941	6.11072	4.93057	4.98836	4.91727
ENSMUSG00000037278.10	Tmem97	5.07816	5.00629	5.04597	6.01444	5.8292	5.95316	5.58396	5.66103	5.83507	6.23409	6.16649	6.26735
ENSMUSG00000032231.15	Anxa2	8.72568	8.8116	8.73529	9.50067	9.44687	9.47633	8.95935	8.95569	8.96347	9.30874	9.33076	9.40641
ENSMUSG00000031333.8	Abcb7	5.5649	5.5803	5.54397	4.95585	4.90702	5.01211	5.43649	5.35089	5.40027	4.75491	4.71671	4.66354
ENSMUSG00000040195.12	Nemp1	4.8379	4.79758	4.57133	5.68316	5.75715	5.82848	4.40298	4.48614	4.55753	5.92765	5.94735	5.84393
ENSMUSG00000055053.19	Nfic	7.81992	7.89976	7.83715	8.4341	8.40876	8.40901	7.50861	7.55653	7.5786	8.5133	8.48064	8.40292
ENSMUSG00000083833.5	Gm13841	6.34729	6.31944	6.40259	5.32569	5.28256	5.21477	6.05681	6.05321	6.08666	5.43925	5.34028	5.57567
ENSMUSG00000046873.19	Mbtps2	6.55773	6.62626	6.59884	6.10513	6.147	6.18506	6.49537	6.45321	6.45109	5.90436	5.93704	5.80426
ENSMUSG00000035916.9	Ptprq	2.23305	2.1408	2.12195	3.62596	3.72099	3.5721	3.93729	4.09437	4.03154	3.60786	3.60471	3.56348
ENSMUSG00000020601.9	Trib2	1.58687	1.81181	1.58269	2.93988	3.1635	2.99927	2.05423	2.1094	2.00627	3.41673	3.50104	3.46255
ENSMUSG00000019850.12	Tnfaip3	3.97889	3.92211	3.921	4.955	5.1456	4.90824	5.0537	5.17836	5.0812	5.08787	5.0661	5.02029
ENSMUSG00000014633.16	Cmc2	2.84611	2.85046	3.07849	4.20723	4.22141	4.08597	3.16613	3.26669	3.17171	4.26186	4.356	4.44549
ENSMUSG00000017664.17	Slc35c2	5.69475	5.6402	5.59387	4.96268	4.95465	5.11068	5.82942	5.82986	5.81515	4.77187	4.68453	4.77403
ENSMUSG00000058799.17	Nap1l1	9.2603	9.33712	9.27468	8.80048	8.83232	8.90087	8.87437	8.81361	8.81941	8.69103	8.71142	8.7159
ENSMUSG00000038146.9	Notch3	4.65172	4.63225	4.68867	5.49178	5.43188	5.24581	4.09616	4.21104	4.18711	5.93916	5.93414	5.72749
ENSMUSG00000038668.15	Lpar1	5.25015	5.17779	5.21879	6.07946	6.09442	6.12037	5.77867	5.69585	5.70535	5.96579	5.93414	5.89179
ENSMUSG00000030105.9	Arl8b	7.4902	7.54557	7.61588	6.98161	6.96952	7.02002	7.38445	7.38139	7.41222	6.91659	6.93658	6.95841
ENSMUSG00000024999.8	Noc3l	6.22822	6.26908	6.21036	5.94936	5.96292	6.00443	6.74746	6.74956	6.64047	5.55622	5.52562	5.46456
ENSMUSG00000109946.2	Brd3os	4.1832	4.17853	4.27762	3.83566	3.92608	3.99754	3.82005	3.7907	3.86134	2.63025	2.92861	2.8175
ENSMUSG00000095526.3	Gm10243	5.25614	5.19848	5.25315	4.04146	4.00092	3.98472	4.65121	4.67993	4.7076	4.17324	4.22248	4.36808
ENSMUSG00000081604.6	Gm11518	6.70488	6.70211	6.86042	5.8758	5.82509	5.7784	6.40787	6.41774	6.39016	5.92046	5.81715	5.98207
ENSMUSG00000030880.15	Polr3e	5.25272	5.1686	5.23397	4.6598	4.75195	4.75375	4.80346	5.0589	4.94612	3.96696	4.10952	4.12223
ENSMUSG00000024925.12	Rnaseh2c	4.61088	4.42877	4.50749	5.10827	4.97789	5.05656	4.70152	4.90933	4.78826	5.57821	5.6424	5.75015
ENSMUSG00000000901.18	Mmp11	7.00144	6.87348	6.98159	6.05013	6.11291	6.07355	6.80114	6.70934	6.77895	6.21431	6.21132	6.28741
ENSMUSG00000028568.17	Btf3l4	5.72839	5.66895	5.71187	5.29357	5.42586	5.41991	5.35096	5.39185	5.29922	4.71391	4.65163	4.84592
ENSMUSG00000082926.4	Gm8172	5.59763	5.60282	5.64653	4.55645	4.39301	4.46279	4.97036	4.96935	4.98037	4.60354	4.63335	4.76452
ENSMUSG00000023235.15	Ccl25	4.81604	4.72984	4.91074	3.93617	4.00254	4.08597	4.0598	4.19197	4.19379	3.61975	3.69166	3.52645
ENSMUSG00000026479.14	Lamc2	1.32544	1.23918	0.89275	1.91595	1.85536	1.9166	2.14296	2.51945	2.3375	3.29354	3.35753	3.48588
ENSMUSG00000062825.16	Actg1	10.8473	10.8379	10.8862	10.6033	10.5924	10.531	10.4166	10.4757	10.4741	10.2237	10.239	10.3207
ENSMUSG00000026434.13	Nucks1	5.6859	5.65045	5.71248	6.48612	6.63005	6.69173	6.066	6.09871	6.08262	6.71944	6.75225	6.56263
ENSMUSG00000031295.14	Phka2	5.09736	5.1355	5.21794	5.85715	5.78377	5.80834	4.6628	4.71152	4.62465	5.94586	5.92666	5.9125
ENSMUSG00000030089.16	Slc41a3	3.82844	3.80395	3.83286	1.99131	2.1407	2.02795	2.91409	2.8011	2.99536	2.07885	2.26888	2.29057
ENSMUSG00000020648.4	Dus4l	4.16147	4.19015	4.02749	3.21603	3.30148	3.56719	4.72714	4.70369	4.63697	2.44226	2.63	2.61606
ENSMUSG00000052316.10	Lrrc15	2.10229	1.87075	1.7328	5.07716	4.99264	4.73964	3.27886	3.63704	3.60955	5.40532	5.33841	5.26995
ENSMUSG00000084111.5	Gm15710	8.93381	8.9151	9.01919	7.77636	7.7602	7.72737	8.44954	8.47836	8.45748	7.97834	7.95475	8.16998
ENSMUSG00000057262.3	Rpl15-ps6	6.80959	6.66007	6.83131	5.73241	5.73101	5.68182	6.24588	6.24812	6.21713	5.83086	5.861	6.01497
ENSMUSG00000085795.9	Zfp703	6.67867	6.65079	6.70408	7.02199	6.93706	7.03231	6.96783	6.85054	6.89943	7.32381	7.33767	7.30847
ENSMUSG00000015656.18	Hspa8	10.7767	10.9295	10.8578	9.97769	9.94918	10.0448	10.3187	10.2219	10.2498	10.1787	10.1491	10.1931
ENSMUSG00000039989.8	Cbx4	5.83061	5.85715	5.77034	5.27724	5.36294	5.34663	5.6378	5.66909	5.63091	5.0964	5.06534	5.00781
ENSMUSG00000026150.15	Mff	6.80726	6.79822	6.84319	6.32134	6.43962	6.45489	6.69848	6.58573	6.61204	6.0906	6.13437	6.07689
ENSMUSG00000029310.14	Nudt9	5.3671	5.2846	5.38524	6.06962	6.03591	6.10606	5.58579	5.5845	5.63522	6.11389	6.11658	6.27704
ENSMUSG00000007594.11	Hapln4	3.42844	3.36853	3.39907	2.10054	2.35366	2.31232	2.47814	2.43547	2.6067	1.55112	1.71833	1.62061
ENSMUSG00000055760.13	Gemin6	2.80466	2.88763	2.87394	3.83937	3.92437	3.86785	3.07886	3.1028	3.15124	4.03066	4.09178	4.14032
ENSMUSG00000031221.8	Igbp1	6.63499	6.67579	6.67346	5.8092	5.86926	5.7554	6.47053	6.43271	6.49304	5.92646	5.97824	6.03664
ENSMUSG00000001248.16	Gramd1a	6.71393	6.70731	6.67222	6.25894	6.22052	6.26262	6.17239	6.05849	6.09874	7.31073	7.296	7.28057
ENSMUSG00000039220.17	Ppp1r10	5.9196	6.02454	5.95225	5.70571	5.79456	5.65721	5.66514	5.76736	5.79824	5.12864	5.16269	5.08114
ENSMUSG00000030554.17	Synm	2.22608	2.30853	2.06269	4.17821	4.10108	4.08769	2.8466	2.52961	2.64624	4.10583	4.10657	3.79491
ENSMUSG00000040565.9	Btaf1	7.24602	7.23706	7.23829	6.78193	6.85135	6.83642	7.38585	7.4388	7.4115	6.53248	6.52583	6.32347
ENSMUSG00000110275.2	Gm5905	6.15038	6.11611	6.25116	5.03002	5.05952	5.04689	5.58883	5.57165	5.40315	4.786	4.96501	5.07089
ENSMUSG00000032788.16	Pdxk	5.90114	5.9143	5.86226	5.01778	5.01126	5.01211	6.04091	6.03058	6.06813	5.2154	5.23247	5.12474
ENSMUSG00000028034.16	Fubp1	8.04922	8.03508	8.03631	7.34518	7.39773	7.43433	7.65389	7.69728	7.67824	7.40732	7.42627	7.26061
ENSMUSG00000032850.17	Rnft2	3.05695	3.21454	3.25761	1.30309	1.59689	1.22745	2.18857	2.35203	2.32537	1.15347	0.773066	0.908246
ENSMUSG00000006585.4	Cdt1	6.65457	6.5756	6.7302	6.97972	6.96267	6.98388	6.945	6.95226	6.94919	7.29846	7.25427	7.29679
ENSMUSG00000039221.11	Rpl22l1	5.90387	5.88243	6.00485	4.98128	4.88699	4.92464	5.55875	5.58876	5.41965	4.9597	4.89941	5.05884
ENSMUSG00000039230.15	Tbcd	6.0186	6.05026	6.01466	5.43586	5.3407	5.42738	5.81027	5.8211	5.81894	5.33917	5.37002	5.27517
ENSMUSG00000045055.6	Rpsa-ps2	7.62481	7.68815	7.69621	6.64359	6.54841	6.67785	7.0566	7.07659	7.00777	6.90692	6.9241	7.03906
ENSMUSG00000034659.15	Tmem109	5.79283	5.7675	5.81983	6.32763	6.26337	6.29712	5.907	6.05013	6.01105	6.46244	6.47714	6.51931
ENSMUSG00000074781.6	Ube2n	6.44121	6.46109	6.40781	7.02505	6.97819	7.05637	6.7972	6.70906	6.73549	7.0168	7.04672	7.07177
ENSMUSG00000025130.12	P4hb	8.82268	8.80183	8.84391	9.44369	9.43301	9.37923	8.98635	9.03306	9.00405	9.32047	9.33191	9.38851
ENSMUSG00000084131.2	Rpl3-ps2	7.25994	7.12589	7.3131	5.86536	5.80109	6.05614	6.67062	6.61704	6.69482	5.92006	5.87013	5.93057
ENSMUSG00000089715.13	Cbx6	8.08621	8.05972	7.97385	8.48964	8.48952	8.47666	7.74365	7.7403	7.73938	8.69003	8.6751	8.57167
ENSMUSG00000039068.17	Zzz3	7.83043	7.91272	7.88951	7.54655	7.56738	7.59801	8.08907	8.03919	8.05893	7.19386	7.22558	7.02674
ENSMUSG00000025154.16	Arhgap19	3.66045	3.46731	3.55771	5.30771	5.25088	5.22415	3.68564	4.11982	3.89251	5.4957	5.34091	5.34063
ENSMUSG00000028803.19	Nipal3	3.33447	3.21128	3.10443	1.9089	2.04962	1.85351	2.20768	2.14288	2.23098	1.43932	1.20565	1.09518
ENSMUSG00000100801.2	Gm15459	8.94994	9.12764	9.07174	8.19885	8.19236	8.21989	8.50153	8.39848	8.42597	8.35278	8.36143	8.40649
ENSMUSG00000022425.17	Enpp2	7.70992	7.81146	7.68382	8.23435	8.19528	8.08659	7.97529	8.0631	8.01335	8.42335	8.48312	8.51735
ENSMUSG00000022752.10	Tomm70a	7.73803	7.7746	7.74768	7.35413	7.42426	7.46367	8.1341	8.08372	8.08705	7.18572	7.19753	7.12558
ENSMUSG00000032085.6	Tagln	9.33084	9.32508	9.32593	9.64747	9.6321	9.62505	8.62575	8.7027	8.68138	8.7495	8.74956	8.84538
ENSMUSG00000026153.16	Fam135a	6.21422	6.22418	6.17626	5.83593	5.84914	5.83615	6.41405	6.42627	6.40465	5.62121	5.62863	5.55498
ENSMUSG00000032058.15	Ppp2r1b	5.14058	5.14492	5.12142	5.61006	5.68938	5.66527	5.40785	5.49593	5.42036	5.87326	5.81625	5.86435
ENSMUSG00000028760.17	Eif4g3	6.85486	6.83304	6.80471	5.5854	5.72317	5.79739	6.19611	6.26684	6.09919	5.36411	5.32139	5.11313
ENSMUSG00000062151.14	Unc13c	2.16915	2.07071	2.10736	4.0812	4.22002	4.31107	2.80537	2.74987	2.65596	3.78718	3.76808	3.5389
ENSMUSG00000094122.2	Rpl31-ps9	5.31556	5.41052	5.38221	4.2497	4.20743	4.10133	4.82528	4.71152	4.6781	4.23507	4.26134	4.42954
ENSMUSG00000028121.9	Bcar3	4.11135	4.04051	3.95398	5.01121	4.95716	4.98844	4.43982	4.6879	4.53268	5.10558	5.11959	5.06057
ENSMUSG00000043243.16	Niban3	3.49366	3.1883	3.25099	1.36621	1.57092	1.65504	1.56441	1.53437	1.65529	1.26866	1.36178	1.37615
ENSMUSG00000070461.4	9230112E08Rik	3.86475	3.934	3.9702	2.61114	2.39371	2.68275	3.22985	3.12643	3.15809	2.05571	2.27413	1.77171
ENSMUSG00000023169.16	Slc38a1	8.33458	8.4009	8.32725	8.20237	8.2351	8.23457	8.21681	8.22418	8.17174	7.74551	7.75633	7.59801
ENSMUSG00000055850.13	Rnf181	6.05392	5.88499	5.91032	6.62972	6.62032	6.59046	6.09964	6.2307	6.10319	6.71806	6.72399	6.81736
ENSMUSG00000096145.3	Vkorc1	4.07694	4.08207	4.19725	5.13344	5.04937	4.95689	4.33072	4.30573	4.35165	5.03707	5.10787	5.13297
ENSMUSG00000027078.15	Ube2l6	1.06953	0.957839	1.29154	1.8947	1.78933	1.82089	3.50943	3.72147	3.69689	2.93932	2.94187	3.04748
ENSMUSG00000031387.15	Renbp	4.64782	4.58526	4.61065	3.38305	3.47951	3.56719	4.3835	4.18073	4.31684	3.42353	3.35257	3.50377
ENSMUSG00000005469.11	Prkaca	6.80726	6.76365	6.82435	7.31866	7.30889	7.31809	6.49893	6.51045	6.51857	7.32728	7.30196	7.30538
ENSMUSG00000037990.19	Sh3rf3	4.11135	4.1951	4.22454	5.44807	5.55012	5.43279	4.68684	4.51071	4.64309	5.38457	5.31248	5.1493
ENSMUSG00000057315.15	Arhgap24	5.4906	5.59535	5.56146	5.0677	5.14267	5.10392	5.33656	5.20555	5.28128	4.6831	4.74913	4.65098
ENSMUSG00000010601.15	Apol7a	1.35127	1.18713	1.67462	2.45533	2.26467	2.58902	2.50414	2.4989	2.56087	3.37059	3.60471	3.58285
ENSMUSG00000025792.10	Slc25a10	3.24776	2.75537	3.18999	4.72447	4.76823	4.84578	3.55741	3.64874	3.69689	4.81731	4.86763	4.95491
ENSMUSG00000014778.11	Fhod1	5.65643	5.66955	5.62109	5.85302	5.85004	5.81819	5.43175	5.42012	5.43667	6.28412	6.29378	6.22291
ENSMUSG00000061833.7	Gm6311	8.12263	8.07109	8.18384	7.18516	7.12371	7.07853	7.82378	7.87242	7.85847	7.13469	7.05113	7.2852
ENSMUSG00000031245.9	Hmgn5	2.88641	3.20475	2.92058	4.2144	4.27868	4.10642	3.92001	3.90049	3.76583	4.53824	4.35228	4.45997
ENSMUSG00000025404.16	R3hdm2	7.17234	7.25534	7.1739	6.97551	7.01135	7.08068	7.01448	6.99918	7.06474	6.60078	6.57824	6.5898
ENSMUSG00000041431.17	Ccnb1	5.30816	5.29232	5.36008	7.00907	7.01617	7.09247	5.49471	5.85432	5.74288	7.16001	7.19805	7.24549
ENSMUSG00000034165.17	Ccnd3	6.98246	6.98581	7.0305	7.51425	7.5385	7.41448	6.82377	6.80604	6.89738	7.60996	7.63735	7.70047
ENSMUSG00000002603.16	Tgfb1	5.32455	5.35705	5.37157	5.93034	5.8136	5.82077	5.12246	5.15229	5.10712	6.06184	6.02377	6.1073
ENSMUSG00000041057.11	Wdr43	7.57705	7.6395	7.61378	7.36656	7.41487	7.37097	7.90214	7.94291	7.87338	7.09373	7.06274	7.01965
ENSMUSG00000036327.19	Qsox2	4.89936	4.82552	4.82975	4.2385	4.24076	4.1693	4.66971	4.63945	4.63697	4.00068	3.98215	4.02116
ENSMUSG00000117405.2	Rpl19-ps7	4.85153	4.7856	4.81412	3.77686	3.75213	3.81501	4.40436	4.3321	4.42879	3.81674	3.87563	3.93901
ENSMUSG00000072940.6	Gm10443	7.59388	7.59541	7.62199	6.55407	6.52013	6.59258	6.9036	6.9234	6.91063	6.72793	6.63878	6.90074
ENSMUSG00000024181.10	Mrpl28	5.31965	5.42112	5.48029	5.83128	5.75859	5.79109	5.7776	5.85634	5.85155	6.16548	6.19688	6.31951
ENSMUSG00000050244.10	Heatr1	6.39268	6.44283	6.41856	6.09002	6.17276	6.13121	6.82944	6.77648	6.77617	5.75251	5.77656	5.61969
ENSMUSG00000024921.18	Smarca2	4.19394	4.31817	4.13028	5.08969	5.06883	5.12911	4.50049	4.41117	4.40881	5.12656	5.13338	5.12474
ENSMUSG00000057244.7	Gm6139	5.52929	5.4939	5.58732	4.60633	4.55961	4.5487	5.27371	5.28942	5.3	4.58345	4.52079	4.74531
ENSMUSG00000047139.10	Cd24a	6.36957	6.5329	6.39811	7.20741	7.18062	7.08369	6.12458	5.95154	5.93725	7.4458	7.4618	7.53182
ENSMUSG00000020198.9	Ap3d1	8.21232	8.19877	8.24019	7.89237	7.91022	7.9159	8.05738	7.99311	8.03376	7.70646	7.66983	7.5799
ENSMUSG00000006599.14	Gtf2h1	6.76765	6.75195	6.82324	6.45106	6.45301	6.47599	6.92685	6.90034	6.9435	6.2244	6.23306	6.25004
ENSMUSG00000028894.19	Inpp5b	6.27956	6.13169	6.30609	6.10552	6.1282	6.07008	6.36098	6.37998	6.39125	5.49784	5.54367	5.44617
ENSMUSG00000028124.16	Gclm	6.50909	6.53746	6.63011	6.8993	6.87032	6.83871	6.6917	6.72766	6.66595	7.22353	7.17507	7.31047
ENSMUSG00000098181.2	Rps12-ps24	5.29242	5.14321	5.25481	4.07491	3.90372	3.91497	4.20637	4.23141	4.24138	4.12819	4.15719	4.29363
ENSMUSG00000035107.14	Dcbld2	5.8841	5.93121	5.84313	6.3509	6.42066	6.37114	5.98938	6.10212	6.10983	6.62211	6.56143	6.53834
ENSMUSG00000022893.15	Adamts1	4.38419	4.29377	4.35221	5.14923	5.1946	4.98108	4.87494	5.00347	5.01854	5.36234	5.33841	5.30244
ENSMUSG00000113625.2	Gm3379	6.79467	6.76421	6.81091	5.88481	5.86437	5.90486	6.19012	6.16337	6.1948	5.90679	5.9358	6.1424
ENSMUSG00000036820.13	Amdhd2	5.35518	5.19684	5.25646	4.78348	4.86845	4.88081	5.49276	5.50497	5.58331	4.38535	4.37689	4.42418
ENSMUSG00000095524.2	Gm15682	4.05942	4.04417	4.02362	2.85439	2.91096	2.93596	3.54243	3.41658	3.45667	2.76834	2.83222	2.87755
ENSMUSG00000063556.6	Gm10132	7.58846	7.55395	7.62343	6.55774	6.51163	6.48967	7.15363	7.19624	7.06611	6.7109	6.77118	6.91442
ENSMUSG00000066568.13	Lsm14a	7.09373	7.12178	7.11382	6.80324	6.81078	6.79583	7.24377	7.28983	7.2186	6.60253	6.59696	6.5814
ENSMUSG00000045917.18	Tmem268	4.24649	4.09978	4.02167	3.42566	3.37585	3.56965	4.40298	4.35942	4.39582	2.90735	2.77039	2.84182
ENSMUSG00000039100.11	Marchf6	7.50141	7.52672	7.46493	7.14859	7.15299	7.11198	7.3601	7.38822	7.30877	6.88452	6.88452	6.72994
ENSMUSG00000078784.9	Rbis	5.56283	5.50124	5.64085	4.97285	5.03282	5.10053	5.23465	5.1856	5.17291	4.75581	4.74251	4.72584
ENSMUSG00000061723.19	Tnnt3	0.255232	0.588074	0.591087	2.53075	2.85826	2.5145	0.76649	1.20725	1.40165	3.0282	3.01896	3.09883
ENSMUSG00000034928.17	Rnf44	6.71113	6.67933	6.66664	6.26102	6.22677	6.17703	6.45295	6.45887	6.46843	6.03621	6.00849	5.84493
ENSMUSG00000105879.2	Gm6204	5.59291	5.45865	5.62365	4.34419	4.29463	4.38265	4.96194	4.98789	5.06488	4.51828	4.5643	4.69614
ENSMUSG00000024269.12	Tpgs2	2.39077	1.91141	2.39247	3.86145	3.84173	3.8857	2.5498	2.88265	2.59664	4.0745	4.0992	4.21669
ENSMUSG00000029826.15	Zc3hav1	7.03594	7.07958	6.95511	6.2228	6.2691	6.35699	7.393	7.41073	7.40899	6.33065	6.40537	6.33672
ENSMUSG00000028854.10	Slc9a1	5.81561	5.86027	5.81983	6.11474	6.08528	6.10309	5.9302	5.96844	6.00441	6.46354	6.43585	6.38544
ENSMUSG00000086925.2	Gm6286	4.97189	5.0461	5.01505	4.11682	4.14134	4.06698	4.53747	4.512	4.58323	4.03066	3.98855	4.18219
ENSMUSG00000013698.13	Pea15a	6.10746	6.08045	6.04941	6.59665	6.59478	6.59559	6.20881	6.33795	6.3887	6.72862	6.81214	6.76136
ENSMUSG00000067121.3	Gm7027	5.93088	5.88703	5.98354	4.95585	5.00965	5.02469	5.45593	5.48357	5.53738	5.08501	5.0968	5.23213
ENSMUSG00000031505.12	Naxd	5.95687	6.03516	6.07166	5.67279	5.59429	5.75324	5.61889	5.69641	5.7199	5.23613	5.20317	5.27592
ENSMUSG00000043079.18	Synpo	5.45457	5.54002	5.48946	6.33816	6.30663	6.25539	5.18166	5.12574	5.1516	6.37223	6.38792	6.17745
ENSMUSG00000019210.11	Atp6v1e1	6.89656	6.93839	6.9579	6.46074	6.40482	6.46647	6.79694	6.73316	6.754	6.30635	6.31241	6.39643
ENSMUSG00000030276.20	Ttll3	4.61755	4.53279	4.70208	3.79226	3.74441	3.69191	3.43028	3.3636	3.45667	3.549	3.42754	3.31112
ENSMUSG00000055884.9	Fancm	3.42541	3.40031	3.52515	4.21868	4.31172	4.24961	3.74354	3.72147	3.81003	4.73045	4.54814	4.49233
ENSMUSG00000021366.9	Hivep1	6.50155	6.44906	6.34275	5.97364	6.02917	5.9903	6.67406	6.69558	6.6328	5.57516	5.59283	5.36321
ENSMUSG00000039994.16	Timeless	4.14864	3.97487	4.15709	6.10398	6.06256	6.16855	4.32927	4.65926	4.59211	6.33276	6.33394	6.12351
ENSMUSG00000022512.4	Cldn1	0.594887	0.685088	0.611906	2.0112	1.96576	2.02079	1.78406	2.01129	1.99099	2.53723	2.61766	2.82566
ENSMUSG00000112474.2	Gm46209	5.27229	5.27839	5.2988	4.01708	3.9993	4.19498	4.6743	4.5574	4.6769	4.20383	4.15007	4.35828
ENSMUSG00000046814.4	Gchfr	0.922254	0.926435	0.50467	2.59366	2.36881	2.84968	1.44063	1.20725	1.42457	3.09784	3.12157	3.06136
ENSMUSG00000048706.4	Lurap1l	6.53573	6.49828	6.50179	7.40481	7.3216	7.32301	6.31618	6.30432	6.33261	7.07065	7.16026	7.23003
ENSMUSG00000027639.17	Samhd1	6.39579	6.46007	6.38531	6.78073	6.77806	6.75379	6.88887	6.91761	6.96222	7.00288	7.04192	6.94468
ENSMUSG00000074034.2	Gm5921	5.46126	5.45178	5.38826	4.42672	4.51264	4.41169	5.09449	5.15475	5.30619	4.36667	4.41423	4.54265
ENSMUSG00000021686.7	Ap3b1	6.85175	6.98272	6.86069	6.53187	6.51645	6.50355	6.50023	6.39639	6.38469	6.23409	6.20824	6.10897
ENSMUSG00000021453.3	Gadd45g	5.62634	5.46482	5.55342	6.22067	6.17312	6.0963	6.72663	6.82627	6.67882	6.32552	6.30344	6.37298
ENSMUSG00000032265.15	Tent5a	4.41666	4.52364	4.62736	5.21858	5.26715	5.20453	5.22217	5.26454	5.20471	5.44927	5.38647	5.35619
ENSMUSG00000048481.16	Mypop	3.54211	3.64422	3.6207	4.39048	4.3389	4.24347	3.82212	3.9524	3.93105	4.63316	4.56965	4.64062
ENSMUSG00000032604.17	Qars	6.94956	6.93445	6.96803	6.3632	6.39036	6.32827	6.28727	6.21741	6.36186	6.31977	6.32701	6.37333
ENSMUSG00000030591.18	Psmd8	8.05217	7.95746	8.06124	7.42873	7.38491	7.40729	8.31821	8.39553	8.35352	7.34797	7.3596	7.47902
ENSMUSG00000030319.9	Cand2	4.91892	4.88901	4.92537	5.44563	5.43728	5.55927	4.71828	4.68107	4.61472	5.76683	5.814	5.66469
ENSMUSG00000066057.8	Gm1976	3.03322	3.08186	2.93717	2.31838	2.31246	2.31232	2.76723	2.44623	2.41967	1.17511	1.23826	1.06795
ENSMUSG00000117438.2	Rpsa-ps7	6.6484	6.69775	6.72692	5.74434	5.73003	5.70043	6.06818	6.02341	6.13525	5.95527	5.901	6.07347
ENSMUSG00000061533.17	Cep128	2.56088	2.75089	2.58376	4.10298	4.18479	4.25267	2.86678	2.94091	2.99918	4.0874	4.04953	3.86579
ENSMUSG00000046111.18	Cep295	5.44561	5.48314	5.45459	6.18682	6.10878	6.21714	5.26081	5.26834	5.30464	6.12991	6.18369	6.07518
ENSMUSG00000028107.15	Tars2	4.62153	4.55221	4.56734	5.16189	5.11298	5.12244	5.41198	5.44315	5.47492	5.28235	5.37063	5.33778
ENSMUSG00000059776.8	Rpl13-ps6	7.39913	7.3949	7.51828	6.24501	6.12894	6.32863	6.9036	6.90888	6.903	6.57456	6.57559	6.69977
ENSMUSG00000007039.13	Ddah2	4.89607	4.91324	4.92433	5.408	5.27387	5.3008	4.49661	4.50815	4.43163	5.70959	5.65704	5.76877
ENSMUSG00000048758.15	Rpl29	7.86613	7.92667	7.94376	6.8859	6.87343	6.88406	7.52775	7.54499	7.65768	6.97962	6.98441	7.18004
ENSMUSG00000041438.9	Utp4	6.93122	6.87374	6.9038	6.51456	6.52437	6.48187	7.14746	7.16948	7.19358	6.3646	6.26341	6.36287
ENSMUSG00000012296.17	Tjap1	6.94373	6.90151	6.95841	7.06781	7.06407	7.01394	7.09132	7.13994	7.1189	7.43897	7.44443	7.43474
ENSMUSG00000015932.9	Dstn	8.89894	8.93157	8.92355	8.61751	8.6304	8.53845	8.56845	8.55964	8.50867	8.41335	8.39752	8.43624
ENSMUSG00000081684.5	Rps2-ps13	8.66182	8.63792	8.71304	7.7207	7.64928	7.62009	8.3695	8.39414	8.28491	7.68517	7.58918	7.81928
ENSMUSG00000027709.10	Mccc1	4.6851	4.66829	4.66021	4.09524	4.04717	4.03179	4.48491	4.35799	4.41598	3.78014	3.81207	3.7761
ENSMUSG00000037972.8	Snn	5.23289	5.31675	5.31159	5.99377	5.98643	6.07398	5.08763	5.02698	5.05481	5.96462	5.93331	6.01408
ENSMUSG00000019899.18	Lama2	6.95851	6.97434	6.97558	6.49026	6.5567	6.45057	7.10901	7.19085	7.12043	6.31063	6.26209	6.09892
ENSMUSG00000020691.14	Mettl2	4.9604	4.88697	5.06686	4.46086	4.50008	4.42124	5.20958	5.16212	5.18135	4.04689	4.1386	4.03528
ENSMUSG00000022324.16	Matn2	7.04487	7.00778	6.96829	7.53786	7.57502	7.51682	6.68177	6.69784	6.65357	7.50907	7.53703	7.51144
ENSMUSG00000018395.20	Kif3a	5.67635	5.65943	5.62493	5.04858	5.10018	5.16934	5.50698	5.44516	5.53935	4.93454	4.87456	4.82473
ENSMUSG00000029134.15	Plb1	3.30504	3.2307	3.30632	3.83937	3.96481	3.82943	3.68109	3.7347	3.85924	4.36549	4.36955	4.45077
ENSMUSG00000038141.12	Tmem181a	6.19429	6.18491	6.13551	5.67383	5.71973	5.66584	6.29362	6.23808	6.33602	5.56751	5.56096	5.5684
ENSMUSG00000038774.10	Ascc3	6.66393	6.70789	6.60631	6.23448	6.13855	6.24813	7.26351	7.31189	7.23571	6.03547	6.04312	6.0467
ENSMUSG00000020456.18	Ogdh	6.30125	6.32246	6.19923	6.57426	6.57423	6.54095	6.5182	6.57749	6.59224	7.08804	7.08196	6.90122
ENSMUSG00000067870.6	Rpl31-ps8	7.14837	7.29161	7.22167	6.07789	6.02917	5.88627	6.56805	6.51397	6.57249	6.01349	6.10594	6.22907
ENSMUSG00000040957.16	Cables1	2.45172	2.39711	2.12919	3.80181	3.67907	3.84167	3.09264	3.04376	3.12348	3.82361	3.81026	3.69388
ENSMUSG00000031299.11	Pdha1	8.06954	8.16069	8.1209	7.68594	7.70742	7.71244	7.73435	7.69728	7.71037	7.64224	7.61696	7.63689
ENSMUSG00000040463.17	Mybbp1a	8.86019	8.78477	8.8455	8.53413	8.53563	8.56823	9.20938	9.26909	9.25195	8.35137	8.36659	8.33102
ENSMUSG00000039738.17	Slx4	4.63605	4.51442	4.50332	5.29154	5.26647	5.25499	4.9563	4.9842	5.02324	5.49193	5.47179	5.31625
ENSMUSG00000052752.16	Traf7	7.28925	7.27418	7.2836	7.56964	7.50889	7.57909	7.36525	7.38087	7.41812	7.76281	7.77022	7.81877
ENSMUSG00000024900.6	Cpt1a	4.78913	4.96245	4.92952	5.85348	5.8608	5.82489	3.98792	3.82411	3.93704	5.71006	5.77239	5.72368
ENSMUSG00000031023.6	Akip1	2.718	2.82939	2.74322	3.35738	3.41286	3.35295	3.55741	3.61335	3.68507	3.90194	3.92654	3.95023
ENSMUSG00000084106.5	Gm6136	8.15437	8.12893	8.20765	7.29232	7.23261	7.32701	7.73915	7.72767	7.77242	7.36661	7.32507	7.53602
ENSMUSG00000041236.9	Vps41	6.45281	6.54232	6.53657	6.13112	6.17636	6.12204	6.35349	6.25617	6.22572	5.87739	5.86883	5.79703
ENSMUSG00000030074.10	Gxylt2	6.38293	6.38336	6.35476	7.58174	7.60931	7.63761	6.73159	6.54749	6.5109	7.3297	7.34283	7.1927
ENSMUSG00000089764.3	Gm16580	5.59831	5.64564	5.61401	4.87495	4.77013	4.72539	4.98336	5.08411	5.03539	4.85717	4.79368	4.73453
ENSMUSG00000039943.17	Plcb4	4.47214	4.61265	4.56867	3.47899	3.57623	3.60599	4.09957	3.92956	4.01652	3.47241	3.48528	3.33129
ENSMUSG00000036208.14	Nepro	5.13408	5.10252	4.99141	4.48595	4.60829	4.48638	5.33584	5.3516	5.21708	4.14336	4.17835	4.04753
ENSMUSG00000041736.8	Tspo	7.18226	7.0512	7.18001	7.48684	7.38413	7.37501	7.34884	7.43964	7.39364	7.76694	7.80351	7.86609
ENSMUSG00000093587.4	Gm20554	3.40089	3.40031	3.2072	2.23063	2.18702	2.15113	2.47814	2.43005	2.51354	1.80816	1.86474	1.84572
ENSMUSG00000030095.11	Tmem43	5.90768	5.84145	5.89819	6.34177	6.3499	6.28708	6.18128	6.24658	6.26078	6.43804	6.48282	6.4824
ENSMUSG00000078193.3	Gm2000	7.4508	7.33729	7.42173	6.27171	6.24433	6.29452	6.99422	6.93205	6.88529	6.47231	6.44024	6.66413
ENSMUSG00000055407.15	Map6	6.51053	6.64598	6.68671	6.23659	6.21669	6.24044	6.79009	6.72351	6.80812	5.94429	5.88393	5.96419
ENSMUSG00000057672.17	Pkn1	7.86893	7.8195	7.79964	7.48595	7.47269	7.56531	7.54194	7.54358	7.51226	7.32032	7.267	7.21518
ENSMUSG00000042198.13	Chchd7	5.34156	5.12084	5.34306	6.5218	6.53476	6.43348	5.69761	5.69754	5.64257	6.08346	6.10557	6.19604
ENSMUSG00000005575.17	Ube2m	6.84325	6.7102	6.75556	6.35058	6.35149	6.34234	6.6201	6.60958	6.55928	6.1648	6.17037	6.21051
ENSMUSG00000026020.10	Nop58	7.00755	7.04161	7.0358	6.82961	6.89255	6.8534	7.28072	7.31263	7.30877	6.53771	6.4958	6.53896
ENSMUSG00000016382.16	Pls3	7.81268	7.86239	7.81852	8.34533	8.32749	8.29008	7.65374	7.7307	7.60267	8.38599	8.35595	8.35224
ENSMUSG00000021678.10	F2rl1	2.54418	2.17461	2.5246	4.05429	3.94473	4.17576	3.09947	3.14307	3.12348	3.92128	3.93817	3.85787
ENSMUSG00000026727.11	Rsu1	6.85993	6.86626	6.88093	6.77444	6.75302	6.69032	6.80559	6.6596	6.74435	6.21463	6.17599	6.28334
ENSMUSG00000034413.15	Neurl1b	1.085	0.926435	1.02281	2.43093	2.18702	2.39219	0.231713	0.677816	0.604601	3.19901	2.90511	3.22437
ENSMUSG00000024360.9	Etf1	7.78837	7.76547	7.82897	7.48017	7.50946	7.5165	8.09849	8.07215	8.00624	7.30706	7.28336	7.27853
ENSMUSG00000026043.19	Col3a1	8.92214	8.85968	8.81236	10.8614	10.9164	10.7776	8.96416	9.20162	9.1623	10.1736	10.2103	10.1336
ENSMUSG00000045624.16	Esf1	6.19206	6.23103	6.20737	5.50177	5.72758	5.70769	6.5855	6.59393	6.52886	5.40418	5.41765	5.27963
ENSMUSG00000034254.18	Agpat1	6.82953	6.84516	6.87341	6.71682	6.70583	6.68693	6.67549	6.68908	6.70889	6.29743	6.29669	6.37645
ENSMUSG00000021457.15	Syk	2.06376	1.7858	1.62427	2.86171	2.73116	2.59386	2.19497	2.46753	2.49741	3.66059	3.6559	3.68719
ENSMUSG00000053460.9	Ggcx	4.24477	4.18849	4.22116	5.08187	5.04309	4.90533	4.74578	4.73477	4.71576	5.04223	5.09754	5.18775
ENSMUSG00000002395.15	Use1	5.62568	5.65525	5.79274	4.94124	4.92933	4.82845	5.47578	5.51395	5.38281	4.69905	4.62413	4.8409
ENSMUSG00000068466.7	Gm5518	4.47214	4.48912	4.40684	5.10056	5.1667	5.2762	4.58332	4.66157	4.66371	5.27423	5.38344	5.31263
ENSMUSG00000082769.4	Gm15793	3.63176	3.76676	3.70789	2.43585	2.47062	2.65064	3.25762	3.25142	3.30432	2.23123	2.20982	2.41464
ENSMUSG00000031591.15	Asah1	8.66978	8.67589	8.70609	8.32304	8.29927	8.29871	8.50556	8.45231	8.45183	8.08158	8.1689	8.21634
ENSMUSG00000020265.17	Sumo3	7.01564	6.93198	7.00859	7.35072	7.2813	7.23621	7.09923	7.18343	7.18919	7.55892	7.57489	7.57538
ENSMUSG00000066116.4	Gm10154	6.14347	6.08933	6.22564	4.90627	4.94204	4.86989	5.67605	5.64709	5.44089	4.87298	4.84134	5.08284
ENSMUSG00000034993.8	Vat1	8.68961	8.72826	8.72935	8.42355	8.39286	8.46533	8.54453	8.50532	8.5534	8.24923	8.26764	8.25232
ENSMUSG00000000149.11	Gna12	6.98453	6.87913	6.90036	6.63774	6.66831	6.66384	7.02462	7.08005	7.08332	6.3693	6.34521	6.39095
ENSMUSG00000072568.5	Lratd2	4.17057	3.90609	4.01387	3.3805	3.27223	3.36431	4.47968	4.69581	4.5959	2.81043	2.67436	2.71591
ENSMUSG00000021807.7	Rtraf	7.7863	7.77955	7.82117	7.2341	7.21281	7.26377	7.63812	7.5669	7.54057	7.24367	7.21197	7.30665
ENSMUSG00000042834.16	Nrep	1.47387	1.70482	1.86007	4.77962	4.6136	4.66925	1.20732	1.23235	0.844495	3.34457	3.47163	3.29946
ENSMUSG00000040462.14	Os9	7.63059	7.59806	7.59316	7.38589	7.39311	7.43332	7.73846	7.73331	7.661	7.12742	7.11745	7.0888
ENSMUSG00000062210.14	Tnfaip8	4.18858	4.19839	4.19725	4.93691	4.8826	4.89067	4.3793	4.53614	4.45687	5.0267	5.04628	5.19406
ENSMUSG00000020894.17	Vamp2	5.75765	5.77469	5.70099	5.37641	5.30374	5.39659	5.28275	5.28643	5.29767	5.08858	5.07891	5.02915
ENSMUSG00000035161.8	Ints6	6.25497	6.31868	6.15913	5.65341	5.69189	5.65026	5.63839	5.65349	5.67161	5.55415	5.59807	5.61559
ENSMUSG00000010311.16	Optc	0.658322	1.07704	0.611906	3.41326	3.34298	3.20283	1.81762	1.78398	1.54454	2.89436	2.80345	2.75912
ENSMUSG00000031897.10	Psmb10	3.52236	3.56995	3.42871	4.27734	4.11762	3.99389	4.53243	4.57713	4.58068	4.58244	4.6231	4.77508
ENSMUSG00000021900.11	Btd	4.54388	4.44825	4.54044	4.6429	4.72375	4.7032	4.78024	4.80443	4.67929	5.28857	5.44643	5.40324
ENSMUSG00000021240.7	Abcd4	3.14448	3.13778	3.13352	3.83194	3.67501	3.69642	3.36083	3.50164	3.58686	4.3225	4.25338	4.29657
ENSMUSG00000037720.17	Tmem33	6.75259	6.74746	6.73347	6.26896	6.29312	6.25425	6.4758	6.47474	6.46152	6.21757	6.2808	6.21943
ENSMUSG00000108366.2	Gm5586	5.10971	5.04519	5.1114	4.129	3.99605	4.02822	4.59788	4.57836	4.58577	4.08454	4.20334	4.28183
ENSMUSG00000031652.12	N4bp1	7.14261	7.18535	7.12133	6.8146	6.77971	6.90049	7.25473	7.31189	7.326	6.56486	6.51589	6.41444
ENSMUSG00000020664.11	Dld	7.1939	7.21062	7.21403	6.62516	6.64205	6.5983	7.36808	7.37101	7.33718	6.73341	6.6403	6.71494
ENSMUSG00000033166.12	Dis3	7.33506	7.37158	7.32556	6.82236	6.81931	6.81199	7.60201	7.6301	7.62418	6.84287	6.90371	6.8651
ENSMUSG00000033863.3	Klf9	6.50155	6.46861	6.41375	6.04973	6.08337	6.14939	6.31288	6.28007	6.23872	5.88233	5.79312	5.75496
ENSMUSG00000061242.7	Gm9104	4.04367	4.15332	4.03522	2.71179	2.88661	2.85371	3.45182	3.41932	3.59699	2.83782	2.85342	2.86574
ENSMUSG00000115584.2	Gm5854	5.50936	5.36805	5.46106	4.70018	4.58901	4.63448	5.10388	5.07286	5.00529	4.53302	4.64657	4.64293
ENSMUSG00000083621.2	Gm14586	6.61747	6.50859	6.57849	5.47874	5.40396	5.49289	6.02214	6.02476	6.21096	5.50801	5.63016	5.70998
ENSMUSG00000021186.10	Fbln5	9.27043	9.25146	9.27825	9.06035	9.02274	9.01333	9.70425	9.63857	9.67908	8.8019	8.7901	8.84444
ENSMUSG00000083364.5	Llph-ps2	4.26699	4.23249	4.22285	3.59554	3.70516	3.76445	4.44251	4.52982	4.54581	3.15612	3.29174	3.19006
ENSMUSG00000060938.15	Rpl26	9.20012	9.12294	9.22096	8.21027	8.17037	8.15871	8.65889	8.60472	8.59465	8.5139	8.52626	8.67009
ENSMUSG00000031066.11	Usp11	4.35418	4.3687	4.40684	5.02513	5.0352	5.09457	4.95536	5.00438	5.01288	5.08144	5.12031	5.17585
ENSMUSG00000039384.9	Dusp10	2.74747	2.9708	2.83019	3.65995	3.80135	3.94554	3.63476	3.42477	3.62695	4.16109	4.32344	4.3861
ENSMUSG00000081214.4	Rpl35a-ps2	5.00785	4.90722	4.98144	3.83007	3.74441	3.80254	4.3807	4.45582	4.35314	3.95919	3.88767	4.12389
ENSMUSG00000021149.9	Gtpbp4	6.66876	6.78597	6.73703	6.27068	6.27313	6.27997	6.93045	6.83193	6.86108	6.15497	6.13581	6.04801
ENSMUSG00000037552.18	Plekhg2	5.30899	5.34002	5.42254	6.14805	6.13265	6.19901	4.72603	4.65694	4.74565	6.0221	6.00967	5.9807
ENSMUSG00000021832.9	Psmc6	7.80584	7.88209	7.8569	7.4095	7.48563	7.49986	7.68035	7.64537	7.67451	7.26022	7.23504	7.35409
ENSMUSG00000042190.13	Cmklr1	1.13045	0.973289	1.23898	2.78677	2.78486	2.64599	2.08901	1.9445	1.5756	3.1452	3.26825	3.00505
ENSMUSG00000058655.10	Eif4b	10.5151	10.5978	10.5168	9.77759	9.79184	9.78736	9.88638	9.83124	9.8206	10.0552	10.027	9.93674
ENSMUSG00000024330.18	Col11a2	3.25804	3.1582	3.16556	2.20208	1.89775	2.02079	2.63227	2.43005	2.4535	1.05187	1.52044	1.13508
ENSMUSG00000037172.15	Dennd11	4.65172	4.63589	4.48932	4.18698	4.20603	4.21237	4.39049	4.27132	4.23976	3.62369	3.66192	3.65095
ENSMUSG00000053716.10	Dusp7	5.74066	5.81865	5.86822	5.97996	5.99134	5.91166	5.97178	5.98469	6.08801	6.46546	6.43615	6.47821
ENSMUSG00000056498.14	Tmem154	3.06868	3.03478	2.98583	2.33426	2.53023	2.52466	2.62755	2.60842	2.78115	1.04012	1.41028	1.365
ENSMUSG00000024302.17	Dtna	5.89127	5.87011	5.83762	5.47696	5.35789	5.4422	5.56618	5.40087	5.47011	5.14313	5.14345	5.07773
ENSMUSG00000029472.14	Anapc5	7.88241	7.81213	7.87639	8.44815	8.40386	8.39446	7.91225	7.9938	8.00778	8.38338	8.35192	8.34889
ENSMUSG00000095123.2	Gm21781	4.62815	4.70461	4.59505	3.64518	3.59996	3.82738	4.00986	4.05797	4.01085	3.66059	3.4943	3.45993
ENSMUSG00000022475.20	Hdac7	7.65962	7.55587	7.55621	7.99934	7.97611	7.89635	7.35493	7.43035	7.40305	8.2196	8.23342	8.12661
ENSMUSG00000068699.13	Flnc	9.3795	9.40652	9.36641	9.10113	9.12243	9.09908	9.05793	9.09313	9.0478	8.34929	8.29324	8.06404
ENSMUSG00000007041.10	Clic1	7.58541	7.60319	7.66775	7.91322	7.84975	7.90099	7.34902	7.34481	7.34433	8.09663	8.10891	8.18758
ENSMUSG00000017817.12	Jph2	2.21909	2.17461	2.03983	3.33914	3.36582	2.95862	2.59888	2.85058	2.83776	4.03659	3.88938	3.7761
ENSMUSG00000033788.16	Dysf	7.05079	7.06501	6.98509	6.47423	6.45182	6.41106	6.6387	6.61704	6.59446	6.32794	6.25447	6.06187
ENSMUSG00000041556.9	Fbxo2	2.8731	2.76428	2.77126	3.8578	3.51172	3.60599	2.2817	2.14949	2.00627	4.29436	4.18812	4.22133
ENSMUSG00000056131.14	Pgm3	3.81226	3.71715	3.72232	4.3816	4.35927	4.3924	4.35949	4.29237	4.4485	4.70092	4.58241	4.6928
ENSMUSG00000044303.7	Cdkn2a	8.01163	7.89559	7.99171	8.4144	8.26771	8.25063	8.24195	8.18494	8.17913	8.65671	8.63261	8.73753
ENSMUSG00000095865.2	Gm13237	1.6713	1.72321	1.64462	3.18134	3.20348	3.28881	1.97464	2.28163	2.21792	3.14794	3.39657	3.29653
ENSMUSG00000044807.14	Zfp354c	4.65172	4.75799	4.64388	5.47039	5.53733	5.45155	4.44654	4.34941	4.20873	5.55879	5.65049	5.53337
ENSMUSG00000028063.16	Lmna	8.96191	8.9381	8.99321	9.35464	9.33043	9.34671	8.4563	8.41605	8.42357	9.37423	9.38744	9.4016
ENSMUSG00000080921.5	Rpl38-ps2	6.46801	6.37901	6.38569	5.42725	5.34645	5.23888	5.96572	5.96142	5.88293	5.47894	5.53385	5.68556
ENSMUSG00000114133.2	Gm20075	4.42124	4.44271	4.45948	3.98056	4.07052	4.14974	4.10638	4.11138	4.06475	3.2686	3.41808	3.50884
ENSMUSG00000027433.6	Xrn2	7.41299	7.41483	7.41897	7.04347	7.11288	7.10437	7.25281	7.18403	7.1368	6.90934	6.86094	6.81531
ENSMUSG00000029250.6	Polr2b	6.55217	6.56894	6.49725	6.81578	6.82092	6.78504	6.66516	6.65148	6.62137	7.0343	7.02878	7.02031
ENSMUSG00000038274.14	Fau	8.65568	8.60893	8.66092	7.93551	7.83233	7.87031	8.1204	8.15181	8.21841	8.01274	8.01598	8.13566
ENSMUSG00000031353.14	Rbbp7	8.00351	8.08048	8.04399	8.37377	8.37124	8.40248	7.86261	7.89594	7.88156	8.52894	8.48687	8.5969
ENSMUSG00000027011.15	Ube2e3	5.42144	5.41971	5.42033	6.15775	6.23023	6.24583	5.60694	5.60986	5.63767	6.04137	6.01517	6.16586
ENSMUSG00000030352.16	Tspan9	7.5421	7.5446	7.53728	7.28417	7.30643	7.28298	7.67621	7.67956	7.75373	7.0514	7.08961	7.00761
ENSMUSG00000074340.10	Ovgp1	3.68096	3.6634	3.46635	2.21928	2.11098	2.27066	3.33499	3.07878	3.40574	1.9404	1.87169	2.11546
ENSMUSG00000026260.13	Ndufa10	6.19874	6.10388	6.10508	5.43156	5.5573	5.51981	5.97318	5.96377	6.01531	5.45702	5.49727	5.51647
ENSMUSG00000028545.14	Bend5	0.435032	0.567863	0.388818	2.29694	2.11098	2.33559	1.04677	1.0036	1.23007	2.37373	2.44217	2.67138
ENSMUSG00000034543.16	Morc2a	6.6758	6.6963	6.69649	7.1053	7.12371	7.10437	6.916	6.9164	6.92251	7.16204	7.15707	7.11398
ENSMUSG00000042901.11	Aida	5.28323	5.20095	5.29237	6.02671	5.99093	5.92993	5.76851	5.81747	5.81894	5.88725	5.88822	5.99207
ENSMUSG00000035376.11	Hacd2	5.1498	5.1243	5.27534	5.82333	5.83966	5.86693	5.4506	5.42761	5.48245	5.8499	5.86709	5.97796
ENSMUSG00000036371.7	Serbp1	9.21969	9.24883	9.2356	8.81139	8.82347	8.84336	9.34395	9.36332	9.28398	8.78583	8.78752	8.81577
ENSMUSG00000021144.15	Mta1	7.30089	7.3573	7.32142	7.08531	7.14256	7.13745	7.05154	7.0297	7.08332	6.86051	6.81687	6.84469
ENSMUSG00000039234.12	Sec24d	6.88528	6.9243	6.90564	7.36978	7.37306	7.35558	6.73022	6.78843	6.76919	7.35688	7.36853	7.35497
ENSMUSG00000035329.8	Fbxo33	3.67841	3.84442	3.89787	4.33239	4.3453	4.2859	4.35235	4.18395	4.289	4.90085	4.93962	4.73453
ENSMUSG00000037022.4	Mmaa	2.97628	3.24031	2.92474	3.91345	3.72296	3.67148	3.57469	3.44907	3.58686	4.37954	4.40109	4.32847
ENSMUSG00000073557.13	Ppp1r12b	4.10757	4.04964	3.97824	4.86132	4.83793	4.79841	4.21427	4.37359	4.33511	5.04444	4.99473	4.86186
ENSMUSG00000058444.9	Map2k5	5.71229	5.65585	5.7657	5.14698	5.14633	5.1432	5.45193	5.36656	5.38792	4.98901	4.88489	5.04057
ENSMUSG00000032435.10	Dync1li1	6.51017	6.57053	6.60923	6.2624	6.27715	6.20455	6.80768	6.81749	6.81247	5.98161	6.00454	6.05582
ENSMUSG00000030759.17	Far1	6.21202	6.32246	6.28801	6.93487	6.96495	6.94704	6.12584	6.13868	6.07856	6.92519	6.93864	6.79781
ENSMUSG00000040097.17	Flywch1	6.03712	6.1291	6.14089	6.53674	6.50421	6.50387	5.87198	5.94111	5.93176	6.65593	6.6436	6.64612
ENSMUSG00000079435.10	Rpl36a	8.20427	8.16711	8.22127	7.31882	7.28629	7.32338	7.40926	7.37946	7.37408	7.53793	7.50347	7.70185
ENSMUSG00000067058.8	Rps15a-ps5	4.47655	4.73891	4.566	3.07198	3.11939	3.1676	3.8709	3.70363	3.97442	3.29601	3.24704	3.43883
ENSMUSG00000085442.2	Gm3362	6.87891	6.93247	6.94924	5.88615	5.89216	5.90243	6.49148	6.51365	6.37332	6.03842	6.01164	6.24093
ENSMUSG00000029426.9	Scarb2	6.9925	7.00731	7.00785	6.48375	6.5156	6.49711	7.12124	7.14428	7.11516	6.55484	6.55011	6.55376
ENSMUSG00000089682.11	Bcl2l2	5.92067	5.9138	5.859	5.14173	5.19673	5.20926	5.2362	5.32559	5.15074	5.11261	5.0074	4.83486
ENSMUSG00000091086.3	Rpl6l	7.0752	7.17348	7.11974	6.24746	6.28183	6.29081	6.64046	6.69021	6.65235	6.3231	6.22291	6.48305
ENSMUSG00000034947.14	Tmem106a	2.28086	2.20109	2.30568	3.09079	2.96513	3.1114	3.45449	3.47296	3.45389	3.4415	3.46934	3.5139
ENSMUSG00000078521.3	Aunip	0.814993	1.36164	0.99138	3.35479	3.29356	3.22169	1.21993	1.92923	1.92821	3.80984	3.84773	3.93901
ENSMUSG00000082465.2	Rps6-ps3	4.82759	4.73439	4.79604	3.63667	3.56311	3.64843	4.16785	4.19357	4.24138	3.75701	3.77921	3.96507
ENSMUSG00000026930.16	Gpsm1	5.35279	5.36366	5.32898	5.6571	5.65116	5.56667	5.13666	5.1021	5.12034	5.99991	6.01634	5.91823
ENSMUSG00000063236.7	1110038F14Rik	4.60553	4.64436	4.66146	5.06849	5.1478	5.08944	4.94969	5.0377	4.98327	5.36116	5.31057	5.41207
ENSMUSG00000022507.7	1810013L24Rik	6.60075	6.62259	6.57186	6.14918	6.21354	6.12413	6.79405	6.77167	6.73176	6.04908	6.08181	5.98162
ENSMUSG00000020694.18	Tlk2	6.61448	6.56862	6.54302	6.24046	6.32325	6.27057	6.66976	6.66364	6.73263	6.04798	6.04542	6.00961
ENSMUSG00000048574.10	Ccnb1-ps	1.65065	1.27702	1.51799	2.97405	2.85826	2.95111	1.99679	1.7409	2.12999	3.18574	3.20642	3.31402
ENSMUSG00000071655.13	Ubxn1	7.5621	7.54007	7.52207	7.01318	6.96807	7.08347	7.37497	7.35664	7.36337	6.96843	6.96851	7.06748
ENSMUSG00000028945.10	Rheb	6.86077	6.86341	6.88414	6.58674	6.57668	6.58136	6.62987	6.70766	6.66173	6.32673	6.35732	6.4114
ENSMUSG00000058706.6	0610030E20Rik	5.62964	5.58596	5.54464	4.88846	4.90961	4.99393	5.21431	5.30429	5.28755	4.84204	4.91125	4.84492
ENSMUSG00000041559.8	Fmod	4.10377	3.79093	4.13388	6.76861	6.73681	6.58804	5.84273	5.93204	5.99007	6.23538	6.07769	6.11854
ENSMUSG00000024909.16	Efemp2	7.62729	7.54993	7.62231	8.0751	7.99209	7.97384	7.75791	7.79042	7.82021	8.13526	8.09275	8.18926
ENSMUSG00000016493.14	Cd46	2.91266	2.8166	2.78507	1.58546	1.57092	1.97706	2.2877	2.19489	2.01385	0.53734	0.940945	0.763001
ENSMUSG00000026842.17	Abl1	7.0628	7.06681	7.02372	7.46312	7.5273	7.40231	6.91648	6.85762	6.90682	7.69503	7.67505	7.55866
ENSMUSG00000028256.17	Odf2l	4.09425	4.07314	4.09929	4.52797	4.58036	4.64616	4.37507	4.23763	4.23003	4.90085	4.8943	4.92487
ENSMUSG00000028729.16	Ebna1bp2	6.60813	6.4815	6.60339	6.2996	6.2515	6.29452	6.83611	6.81515	6.75258	5.99991	5.95595	5.98162
ENSMUSG00000074516.7	Gm10709	5.5868	5.50257	5.6069	4.61393	4.52959	4.57583	5.41129	5.37292	5.30773	4.73865	4.63335	4.84191
ENSMUSG00000094446.2	Gm6344	5.54476	5.66777	5.71067	4.59319	4.53743	4.65544	5.31983	5.30207	5.22852	4.70465	4.65967	4.87272
ENSMUSG00000035246.17	Pcyt1b	2.72295	3.09251	2.82574	3.97213	4.02023	3.88767	1.98206	2.02572	2.10891	4.35486	4.27711	4.13541
ENSMUSG00000083619.4	Gm14414	5.8545	5.83829	5.85409	4.85216	4.83521	4.85487	5.25086	5.28343	5.32535	5.12309	5.16269	5.25871
ENSMUSG00000016262.15	Sertad4	6.54904	6.61676	6.62755	7.1499	7.11737	7.06183	6.24896	6.3347	6.19647	7.26558	7.24427	7.14891
ENSMUSG00000083411.4	Rpl30-ps10	6.07877	5.95085	6.03984	5.08735	4.92848	5.02916	5.42224	5.51906	5.56666	5.14929	5.25985	5.2707
ENSMUSG00000043284.13	Tmem11	5.67188	5.61211	5.62044	4.94985	4.90442	4.90143	5.78664	5.90302	5.87671	4.8361	4.95523	4.96694
ENSMUSG00000025362.7	Rps26	9.71846	9.77475	9.74081	8.46852	8.5118	8.25092	9.17454	9.18364	9.22424	8.61786	8.60566	8.70531
ENSMUSG00000081534.4	Slc48a1	7.46344	7.46351	7.45416	6.97255	7.02635	6.92204	7.25473	7.26381	7.3368	8.01274	7.96514	8.10898
ENSMUSG00000039910.11	Cited2	7.04906	7.03886	7.12269	7.76408	7.70319	7.67815	7.79445	7.86429	7.87728	7.59498	7.60581	7.70241
ENSMUSG00000020232.18	Hmg20b	6.4772	6.4815	6.53419	6.78434	6.715	6.72075	6.27864	6.40951	6.34092	7.06432	7.05036	7.15842
ENSMUSG00000005802.13	Slc30a4	7.65315	7.6764	7.65025	7.19787	7.24755	7.25997	7.91067	7.84713	7.8974	7.0596	7.14852	6.94468
ENSMUSG00000023050.10	Map3k12	4.91676	4.9351	4.82307	5.61711	5.53173	5.53497	4.63483	4.58811	4.55493	5.73303	5.92957	5.66866
ENSMUSG00000035372.3	1810055G02Rik	5.4115	5.3258	5.44011	6.07907	6.08643	6.10182	5.60454	5.60085	5.64257	6.03214	5.97058	6.12887
ENSMUSG00000030272.16	Camk1	6.97599	7.01457	6.99131	6.29893	6.25626	6.3126	6.84275	6.79133	6.88736	6.31855	6.44752	6.46163
ENSMUSG00000031431.14	Tsc22d3	5.50217	5.55678	5.48806	5.2929	5.31421	5.29041	5.22373	5.28643	5.23907	4.86052	4.90365	4.82167
ENSMUSG00000029836.16	Cbx3	6.30538	6.35304	6.32315	6.72988	6.73681	6.80732	6.14786	6.25694	6.22082	6.8414	6.85854	6.8845
ENSMUSG00000082419.4	Gm11425	5.20041	5.02495	5.25398	4.0812	3.90891	3.99754	4.817	4.84059	4.79707	3.74078	3.69557	4.04753
ENSMUSG00000036533.10	Cdc42ep3	6.3348	6.35267	6.37546	7.34158	7.34811	7.29063	6.65359	6.77674	6.75003	6.9049	6.88023	6.98572
ENSMUSG00000024055.16	Cyp4f13	4.35098	4.47833	4.41575	3.96024	4.09957	4.01206	4.04748	3.95993	4.00326	3.48763	3.50774	3.37082
ENSMUSG00000026821.17	Ralgds	5.69223	5.73332	5.64716	6.36739	6.27414	6.30561	5.29621	5.35874	5.46182	6.29682	6.36534	6.37957
ENSMUSG00000080848.4	Gm9385	7.02118	7.00708	7.09454	6.13263	6.15539	6.11154	6.58733	6.57657	6.57281	6.28567	6.31845	6.5032
ENSMUSG00000030055.17	Rab43	6.39268	6.36956	6.42482	5.69959	5.7315	5.74511	6.0773	5.92964	6.11557	5.71837	5.76495	5.62262
ENSMUSG00000062981.6	Mrpl42	5.26041	5.23979	5.35468	5.8475	5.87722	5.92514	5.51403	5.47241	5.43385	5.88766	5.92081	5.98844
ENSMUSG00000019986.18	Ahi1	4.92538	5.02865	4.87136	4.43901	4.58253	4.38265	4.47706	4.52602	4.45548	4.00673	4.10068	4.01938
ENSMUSG00000087203.8	Gm13986	0.93938	1.30171	1.47318	2.41111	2.46123	2.57442	2.09586	2.08893	2.15762	3.10912	3.07118	3.45993
ENSMUSG00000032340.9	Neo1	8.00694	8.04162	7.98024	7.56011	7.50875	7.56808	7.89699	7.88187	7.89586	7.54755	7.54764	7.4374
ENSMUSG00000021583.8	Erap1	4.80674	5.00535	4.83751	5.43831	5.37237	5.36654	5.3961	5.41601	5.41179	5.59787	5.68737	5.63833
ENSMUSG00000021252.12	Erg28	4.58934	4.58777	4.4865	4.90095	4.91564	4.87487	4.83862	4.73147	4.72271	5.30031	5.26712	5.29071
ENSMUSG00000062075.14	Lmnb2	5.14427	5.02772	5.26141	6.14992	6.15939	6.19782	5.23542	5.38207	5.51219	6.23377	6.24146	6.15822
ENSMUSG00000018604.19	Tbx3	4.68129	4.77131	4.74629	5.18323	5.17965	5.13493	4.55375	4.61461	4.54712	5.51862	5.45743	5.38405
ENSMUSG00000051390.11	Zbtb22	4.72144	4.88186	4.73685	4.24271	4.20181	4.33437	4.53117	4.57958	4.61969	3.85913	3.7718	3.94837
ENSMUSG00000037003.17	Tns2	7.92145	7.88312	7.91342	8.25561	8.22655	8.25579	7.48579	7.44904	7.49188	8.29866	8.32157	8.33119
ENSMUSG00000057182.16	Scn3a	6.83211	6.9927	6.87233	5.51576	5.54957	5.47335	6.3624	6.23109	6.22041	6.05675	6.05766	5.86633
ENSMUSG00000071052.5	Rpl7a-ps5	5.03798	5.14321	5.06591	4.08276	4.31172	4.22956	4.59062	4.60383	4.71227	4.08597	4.12267	4.2428
ENSMUSG00000083424.4	Rpl35a-ps4	4.80907	4.70577	4.79376	3.62811	3.53205	3.59398	4.18403	4.28038	4.18711	3.76417	3.68969	3.93901
ENSMUSG00000098915.2	Rpl15-ps2	5.3278	5.17027	5.32189	4.29907	4.18621	4.28889	4.78449	4.79813	4.75133	4.44891	4.41066	4.52649
ENSMUSG00000085101.8	Platr16	3.44652	3.41735	3.44331	2.90487	3.03327	3.03881	3.05091	2.92175	2.97609	2.24153	2.23158	2.10879
ENSMUSG00000028066.16	Pmf1	3.96013	3.70794	3.88296	5.20641	5.24679	5.2822	4.15314	4.26981	4.55233	5.54119	5.45397	5.62671
ENSMUSG00000024150.13	Mcfd2	6.58417	6.60658	6.62692	6.2724	6.3448	6.27622	6.88665	6.90571	6.88452	6.05055	6.11292	6.13708
ENSMUSG00000020484.20	Xbp1	6.10746	6.11132	6.05702	6.03563	5.93435	5.86393	5.95161	5.95813	5.95212	5.39729	5.45686	5.50001
ENSMUSG00000114003.2	Gm9616	7.88532	7.95284	7.91421	7.05809	6.96267	7.0283	7.30422	7.26571	7.34283	7.42619	7.3397	7.4279
ENSMUSG00000004446.13	Bid	6.43631	6.45526	6.48142	5.99418	5.9013	5.93279	6.78797	6.76845	6.78616	5.93441	5.95718	5.97751
ENSMUSG00000032067.7	Pts	4.15782	4.12938	4.01191	3.21888	3.41286	3.38398	3.21102	3.15625	3.32579	2.9298	2.93525	2.99424
ENSMUSG00000025485.14	Ric8a	5.76428	5.82239	5.76454	5.57151	5.58405	5.68805	6.01944	6.13951	6.08126	5.06052	5.08116	5.17585
ENSMUSG00000087095.3	Emx2os	5.03897	4.94786	5.01992	4.6161	4.65641	4.74725	4.65005	4.67993	4.76262	4.20646	4.25869	4.20736
ENSMUSG00000107768.2	Gm44275	2.92561	2.58482	2.69037	3.84123	3.91752	3.9169	3.21418	3.3086	3.34994	4.14336	4.16992	3.90671
ENSMUSG00000117869.2	Snhg4	4.33812	4.3687	4.33822	3.54869	3.61698	3.81708	3.75007	3.64173	3.67315	3.33017	3.20367	3.27287
ENSMUSG00000032763.12	Ilvbl	5.45606	5.51384	5.61013	4.98044	4.85327	4.71766	5.19927	5.1004	5.07578	4.46107	4.40947	4.62436
ENSMUSG00000001131.12	Timp1	6.53397	6.41304	6.54708	7.30294	7.23881	7.24449	6.63635	6.78551	6.71472	7.09976	7.12691	7.2204
ENSMUSG00000037816.11	Fbxw17	4.05157	3.96331	3.98024	4.67858	4.59654	4.68858	4.794	4.79603	4.82318	4.70557	4.80643	4.76027
ENSMUSG00000033083.17	Tbc1d4	2.51592	2.46971	2.48	3.32332	3.3633	3.27383	2.83845	2.81363	2.96049	3.58985	3.66791	3.62783
ENSMUSG00000036565.8	Ttyh3	6.96663	7.00895	6.98559	7.58934	7.55888	7.55186	6.78612	6.77247	6.76133	7.59498	7.6348	7.44619
ENSMUSG00000039883.6	Lrrc17	1.6297	1.59924	1.5932	3.82259	3.73859	3.71428	0.928866	1.29326	1.24303	3.07787	3.01269	3.05096
ENSMUSG00000117345.2	Gm7926	3.96641	4.00336	3.98623	2.93641	2.83663	2.89346	3.4357	3.22039	3.43989	2.77898	2.59266	2.85383
ENSMUSG00000053604.6	Rpia	5.05281	5.13465	5.13136	4.66504	4.51378	4.55243	5.32421	5.23999	5.342	4.17592	4.36094	4.2275
ENSMUSG00000023046.7	Igfbp6	4.30382	3.98252	4.25795	4.75624	4.8343	4.90824	4.72493	4.50943	4.72733	5.34574	5.37674	5.43756
ENSMUSG00000071456.7	1110002L01Rik	4.49549	4.48239	4.68867	3.51426	3.59137	3.36148	3.61103	3.62524	3.69689	2.23639	2.55864	2.86178
ENSMUSG00000028634.18	Hivep3	2.837	2.6391	2.98583	4.86315	4.88699	4.93134	4.03326	4.1382	4.11142	4.60951	4.3671	4.19954
ENSMUSG00000039623.14	Ap5z1	4.51846	4.32571	4.37065	3.94653	3.99767	3.96059	4.18403	4.02961	4.26539	3.42579	3.25503	3.23359
ENSMUSG00000032103.11	Pus3	4.89936	4.84244	4.96232	3.91873	4.009	4.22645	4.71383	4.64414	4.5627	3.59387	3.77921	3.85389
ENSMUSG00000024610.16	Cd74	6.67899	6.68315	6.74971	7.0224	6.97283	7.14693	6.48725	6.38419	6.53117	7.42591	7.37465	7.50938
ENSMUSG00000026211.19	Obsl1	6.42724	6.41658	6.42886	6.77104	6.74723	6.74919	6.30439	6.29838	6.29695	6.90651	6.89244	6.83538
ENSMUSG00000017760.17	Ctsa	7.75687	7.74621	7.8733	7.38732	7.3513	7.3445	7.97738	7.89213	8.00398	7.1105	7.13973	7.2576
ENSMUSG00000031166.14	Wdr13	5.77326	5.7664	5.72806	5.46198	5.2502	5.40004	5.26385	5.16457	5.0839	4.92819	4.98916	4.88057
ENSMUSG00000027698.15	Nceh1	5.29242	5.45865	5.34306	4.99383	4.99671	4.91018	5.98569	5.8644	5.92624	4.64095	4.5296	4.6008
ENSMUSG00000028656.15	Cap1	8.08633	8.17109	8.12916	7.72372	7.70667	7.67501	7.72277	7.71018	7.7325	7.70041	7.69562	7.70862
ENSMUSG00000099471.2	Gm8451	5.59493	5.51318	5.58337	4.4895	4.44516	4.30813	4.98797	4.96748	4.83713	4.58547	4.46907	4.7496
ENSMUSG00000049553.12	Polr1a	7.10444	7.16531	7.13083	6.94266	6.91895	6.94563	7.42397	7.44099	7.3931	6.55406	6.45158	6.29256
ENSMUSG00000024750.12	Zfand5	7.46325	7.45459	7.50408	7.14934	7.21927	7.22885	7.30014	7.19505	7.20024	6.95755	6.98901	6.94725
ENSMUSG00000005949.10	Ctns	5.96682	5.90073	5.90717	5.3057	5.40702	5.46348	5.53814	5.40156	5.43596	5.23485	5.25721	5.21671
ENSMUSG00000020917.18	Acly	7.77785	7.84452	7.79822	7.97095	7.89602	7.93448	7.59129	7.5953	7.55005	8.35582	8.28619	8.24369
ENSMUSG00000020448.17	Rnf185	5.94632	5.81114	5.90401	5.16337	5.18608	5.23425	6.10984	6.05673	6.20808	4.85382	5.04321	5.11146
ENSMUSG00000031697.13	Orc6	5.25015	5.29462	5.35391	5.88615	5.75715	5.83104	5.47775	5.62297	5.52881	5.9435	5.96856	6.00154
ENSMUSG00000071047.6	Ces1a	0.255232	0.172251	0.262844	1.43654	1.21629	1.4781	1.91387	1.10222	1.73998	2.81043	2.60104	2.72466
ENSMUSG00000033149.18	Phldb2	8.53887	8.61371	8.55404	8.25891	8.32207	8.29119	8.80652	8.7637	8.76037	8.13198	8.11304	8.03005
ENSMUSG00000028282.13	Casp8ap2	4.49114	4.65518	4.39938	5.37321	5.39289	5.38408	4.79189	4.77483	4.82641	5.60436	5.55665	5.33636
ENSMUSG00000020078.17	Vps26a	7.37061	7.40169	7.40356	7.06524	7.10159	7.10776	7.55987	7.56242	7.53433	6.95423	6.97336	6.98185
ENSMUSG00000033701.14	Acbd6	5.99371	5.95377	6.01563	5.39985	5.23444	5.30817	5.66744	5.63125	5.61231	5.18372	5.25256	5.366
ENSMUSG00000006418.18	Rnf114	5.87412	5.86494	5.88596	5.31039	5.30439	5.27244	6.01357	6.09273	6.04797	5.30154	5.28153	5.366
ENSMUSG00000067575.6	Rpl35a-ps3	5.38283	5.1568	5.39052	4.10453	3.96481	4.0791	4.80972	4.79076	4.68286	4.27945	4.20746	4.42954
ENSMUSG00000036499.10	Eea1	7.70524	7.68243	7.67473	7.29958	7.41197	7.39886	7.95623	7.92666	7.92139	6.88411	6.85504	6.62672
ENSMUSG00000024835.16	Coro1b	8.32055	8.25457	8.34349	7.94005	7.85537	7.9218	8.19692	8.1592	8.23421	7.80972	7.79806	7.8563
ENSMUSG00000052833.10	Sae1	6.83955	6.8449	6.85769	7.32181	7.23123	7.31132	7.16508	7.19465	7.15854	7.31195	7.30341	7.38596
ENSMUSG00000080776.2	Gm12174	5.84998	5.83565	5.91137	4.95328	4.71588	4.77625	5.33222	5.40087	5.50884	5.03412	4.90365	5.03794
ENSMUSG00000093798.3	Gm8355	7.4523	7.56466	7.49326	6.65153	6.62821	6.69342	6.9412	6.84648	6.90402	6.7838	6.80581	6.96834
ENSMUSG00000067150.7	Xpo5	7.6013	7.6502	7.6392	7.4586	7.48592	7.51523	7.768	7.77608	7.80555	7.19187	7.17156	7.07711
ENSMUSG00000040749.12	Siah1b	2.70804	2.6196	2.83019	3.73162	3.69518	3.78573	2.98965	3.05083	3.14089	3.82018	3.97893	4.12058
ENSMUSG00000037822.13	Smim14	6.7077	6.56831	6.63901	6.48494	6.49561	6.51951	6.37231	6.37752	6.38213	6.09237	6.12967	6.13257
ENSMUSG00000029221.16	Slc30a9	6.96454	6.90025	6.97934	6.60075	6.58373	6.58834	6.71694	6.64827	6.6815	6.43243	6.46542	6.49588
ENSMUSG00000076435.4	Acsf2	4.99971	5.03694	4.94396	5.32238	5.26715	5.35519	5.23697	5.11312	5.22852	5.68671	5.64341	5.68556
ENSMUSG00000005362.15	Crbn	5.69349	5.74799	5.66719	4.99049	5.14926	5.04865	5.4856	5.42829	5.4493	5.06269	4.9995	4.97978
ENSMUSG00000020167.15	Tcf3	7.63717	7.63192	7.63539	8.03933	7.97343	7.96593	7.35743	7.34966	7.41473	8.07449	8.05692	8.06684
ENSMUSG00000031320.10	Rps4x	10.1837	10.2592	10.2467	9.35961	9.40443	9.3846	9.69838	9.63706	9.67094	9.69816	9.68956	9.81138
ENSMUSG00000020088.11	Sar1a	7.5949	7.57277	7.62759	7.98411	7.98084	7.94327	7.81628	7.80081	7.77117	8.00747	8.00022	8.03225
ENSMUSG00000105144.2	Rpl21-ps11	4.60015	4.81054	4.79944	3.56223	3.35825	3.51208	3.97496	4.00433	4.05927	3.27111	3.40138	3.66464
ENSMUSG00000039137.19	Whrn	2.92561	3.07472	2.9617	2.06293	2.1407	1.82912	1.39689	1.61294	1.45829	1.4571	1.32177	1.34246
ENSMUSG00000002768.9	Mea1	6.20407	6.14155	6.21292	5.96304	5.91513	6.06008	6.46194	6.41466	6.4197	5.60785	5.53494	5.62496
ENSMUSG00000057561.11	Eif1a	6.69294	6.7794	6.66352	6.4879	6.55394	6.54345	6.90506	6.89961	6.8961	6.10582	6.20378	6.19761
ENSMUSG00000034858.17	Fam214a	3.97266	4.09449	3.79694	4.71339	4.76823	4.79945	3.35799	3.49646	3.4511	5.08	5.02074	4.85789
ENSMUSG00000045103.20	Dmd	2.1979	2.44222	2.19275	1.17965	0.99982	1.23984	1.59377	1.77547	1.92821	0.067484	0.0335299	0.419569
ENSMUSG00000015217.12	Hmgb3	3.67841	3.85071	3.66868	4.27323	4.34785	4.27541	3.09606	3.25755	3.31356	4.72954	4.77714	4.64178
ENSMUSG00000052539.16	Magi3	5.44261	5.48853	5.46106	6.03077	6.12002	6.12913	5.61293	5.62889	5.61231	6.06945	6.12641	5.98799
ENSMUSG00000027981.15	Rnpc3	4.97812	4.97017	5.09023	4.34681	4.28668	4.32858	4.33217	4.30573	4.42879	4.04836	4.22112	4.22442
ENSMUSG00000002345.19	Borcs8	4.09425	4.22283	4.00209	3.58453	3.55431	3.66	3.73916	3.7369	3.61952	3.03414	3.00954	3.08871
ENSMUSG00000038740.10	Mvb12b	6.19697	6.26908	6.23196	5.7911	5.77669	5.80626	5.90407	5.93012	6.05808	5.64612	5.64493	5.55436
ENSMUSG00000099492.2	Gm5525	4.58255	4.55862	4.44795	3.61083	3.35063	3.37558	3.97682	3.99336	4.07746	3.48546	3.54297	3.4335
ENSMUSG00000020901.14	Pik3r5	0.758217	0.588074	0.526764	2.23628	1.93894	1.71838	1.29334	1.2692	1.7123	2.83443	2.85693	2.69382
ENSMUSG00000017478.16	Zc3h18	7.09588	7.10018	7.06959	7.34469	7.35526	7.37571	7.23875	7.26894	7.28293	7.60199	7.61165	7.49236
ENSMUSG00000040721.10	Zfhx2	3.50808	3.54432	3.59217	3.01731	3.1164	3.11476	3.04738	3.11972	3.12348	2.22606	2.44217	2.40379
ENSMUSG00000019846.12	Lama4	4.86167	4.74117	4.75217	6.03887	6.0645	5.95551	4.9094	5.14156	4.93917	5.70959	5.85444	5.65272
ENSMUSG00000025747.13	Tyms	4.35896	4.47427	4.22116	5.6327	5.61668	5.53686	4.5299	4.66733	4.91711	5.90881	5.90778	6.00109
ENSMUSG00000007872.4	Id3	2.98867	2.8037	3.07475	4.28825	4.35421	4.05826	3.14646	3.2878	3.48966	4.28194	4.29531	4.31695
ENSMUSG00000002017.11	Fam98a	5.61971	5.69888	5.66719	6.22458	6.24433	6.22456	6.1073	6.07982	6.04242	6.22731	6.31081	6.16305
ENSMUSG00000041889.8	Shisa4	4.88617	4.70923	4.88532	5.65394	5.69038	5.57219	5.03242	5.02518	5.09109	5.60237	5.53713	5.67882
ENSMUSG00000028037.14	Ifi44	3.83988	4.02391	4.12848	0.680755	0.546163	1.1768	6.79957	6.93157	6.80703	1.69288	1.38138	1.65762
ENSMUSG00000028982.10	Slc25a33	4.36055	4.27207	4.49073	3.72562	3.52755	3.5721	4.94685	5.01798	5.1009	3.095	2.82508	3.22437
ENSMUSG00000033589.5	Reep4	5.1708	4.98835	5.15017	5.61169	5.49768	5.58499	4.69927	4.84466	4.96383	5.92805	5.96653	5.97476
ENSMUSG00000066315.10	Gm12918	8.36213	8.31692	8.48765	7.18406	7.12036	7.27435	7.90494	7.90755	7.86712	7.56699	7.54398	7.6899
ENSMUSG00000031683.17	Lsm6	4.58255	4.55349	4.50471	5.16485	5.16598	5.08773	4.82631	4.77376	4.72502	5.27799	5.31121	5.50128
ENSMUSG00000008035.13	Mid1ip1	6.60813	6.5462	6.65038	6.13074	5.96831	6.05395	6.83534	6.85232	6.8103	6.01048	6.04964	6.03444
ENSMUSG00000067722.5	BC003965	5.07816	4.92818	5.02866	4.72045	4.75292	4.8192	5.18407	5.20238	5.17122	4.28568	4.26662	4.31984
ENSMUSG00000114995.2	Gm49284	2.77635	2.64876	2.57318	1.50359	1.59689	1.56928	1.37451	1.50377	1.73081	1.00431	1.01809	0.938628
ENSMUSG00000094870.9	Zfp131	6.38293	6.47541	6.47611	6.22493	6.17994	6.21322	6.60185	6.63098	6.64536	5.95175	5.93497	5.96326
ENSMUSG00000003344.15	Btbd2	6.05539	6.06836	6.14491	6.51427	6.46569	6.51091	5.63604	5.64651	5.74573	6.63266	6.61026	6.70171
ENSMUSG00000020280.13	Pus10	5.35279	5.45797	5.39878	4.86041	4.8966	4.87784	5.23465	5.19042	5.25034	4.71668	4.75289	4.79597
ENSMUSG00000087403.10	Kantr	4.76772	4.81912	4.69356	3.75932	3.77695	4.07045	4.20795	4.15306	4.15319	3.53023	3.77551	3.60906
ENSMUSG00000069188.6	Gm13192	5.77147	5.90879	5.84807	4.73647	4.72375	4.72209	4.92969	5.00256	5.0866	4.6458	4.82979	4.99612
ENSMUSG00000017314.13	Mpp2	3.20238	3.27188	3.12992	3.94826	3.80321	3.65538	2.78005	2.8011	2.59664	4.42991	4.34481	4.31984
ENSMUSG00000068335.7	Dok1	5.61039	5.50656	5.52831	5.7718	5.82737	5.66354	6.14083	6.2028	6.11028	6.18561	6.14945	6.22021
ENSMUSG00000029122.12	Evc	5.16989	5.24775	5.20429	5.6785	5.73734	5.75809	5.0712	5.09869	5.02793	5.78277	5.80178	5.78035
ENSMUSG00000037470.15	Uggt1	7.31182	7.2693	7.32221	7.13317	7.16859	7.16511	7.53202	7.56582	7.5722	6.82609	6.83519	6.69171
ENSMUSG00000004455.17	Ppp1cc	6.79849	6.78187	6.81961	6.98811	7.01356	7.03409	6.97761	7.0364	7.02029	7.21637	7.25077	7.2999
ENSMUSG00000042506.16	Usp22	7.57106	7.65305	7.55369	7.19316	7.19981	7.19007	7.24339	7.28665	7.30569	7.16322	7.11178	7.09366
ENSMUSG00000030942.9	Thumpd1	5.98858	5.97071	5.88114	5.58595	5.5606	5.58256	6.22961	6.14861	6.18225	5.33437	5.38708	5.41477
ENSMUSG00000046865.8	Fbl	6.71393	6.69688	6.66228	6.24606	6.18458	6.25234	6.86574	6.76979	6.80266	6.19358	6.1041	6.1984
ENSMUSG00000036822.7	Topors	5.73454	5.78074	5.71127	6.09469	6.14113	6.11449	6.04623	6.02745	5.97365	6.34564	6.27393	6.23099
ENSMUSG00000028211.12	Trp53inp1	5.89676	6.08267	5.88489	5.31106	5.25156	5.43683	5.75125	5.66218	5.59914	4.99511	4.98596	4.81452
ENSMUSG00000075053.4	Vdac3-ps1	5.90169	5.89972	5.8747	5.51227	5.54624	5.55556	6.03066	6.06199	6.03126	5.1445	5.22977	5.3625
ENSMUSG00000029287.15	Tgfbr3	5.51222	5.47095	5.4732	5.89599	5.90564	5.89902	5.68971	5.67253	5.76999	6.1896	6.14659	6.00693
ENSMUSG00000001366.15	Fbxo9	4.86055	4.82658	4.81636	4.53371	4.63464	4.42667	4.37789	4.3321	4.30608	4.05858	4.05869	4.04753
ENSMUSG00000037461.11	Ints7	5.22156	5.24298	5.24067	5.93425	5.96582	5.89413	5.41746	5.39671	5.46459	5.852	5.92206	5.76188
ENSMUSG00000028217.12	Cdh17	0.658322	0.810803	0.364488	2.56255	2.51215	2.09085	1.72338	1.64133	1.98329	2.80697	2.67039	2.68488
ENSMUSG00000029552.20	Tes	5.62369	5.69772	5.76686	6.21746	6.15102	6.2002	5.36024	5.25232	5.19724	6.29311	6.33299	6.34773
ENSMUSG00000033715.16	Akr1c14	4.35737	4.43854	4.33666	4.67754	4.74326	4.81713	4.87095	4.63593	4.6613	5.21213	5.27434	5.22367
ENSMUSG00000022964.15	Tmem50b	3.99536	3.84442	3.97824	4.71944	4.76823	4.67952	3.49913	3.76942	3.65872	4.84626	4.80914	4.92298
ENSMUSG00000022505.10	Emp2	8.56928	8.62407	8.55907	8.07116	8.07343	8.11619	8.8223	8.8248	8.87261	8.16184	8.17698	8.19113
ENSMUSG00000079641.4	Rpl39	8.31575	8.25792	8.29844	7.17362	7.12705	7.13558	7.63239	7.59121	7.50874	7.38848	7.3673	7.60113
ENSMUSG00000116174.2	Gm10362	4.58799	4.45926	4.61581	3.45257	3.38333	3.14142	3.86288	3.89657	3.86763	3.48546	3.41571	3.56591
ENSMUSG00000072235.7	Tuba1a	7.82627	7.89521	7.81516	8.71483	8.95414	8.99415	8.01551	8.13246	8.12494	9.42171	9.42996	9.51026
ENSMUSG00000020513.16	Tubd1	1.61911	1.37333	1.62427	2.7279	2.65081	2.88954	2.06125	2.09579	2.16444	3.05763	2.93525	3.02995
ENSMUSG00000107257.2	Gm43028	4.06334	3.98252	3.95805	2.80588	2.95847	2.95111	3.45449	3.48867	3.33489	2.6727	2.62178	2.9539
ENSMUSG00000028597.12	Gpx7	1.72166	1.68619	1.89447	2.71583	2.43268	2.72743	1.97464	2.42462	2.28835	3.37994	3.39898	3.55124
ENSMUSG00000021236.17	Entpd5	4.19751	4.15671	4.23464	3.17548	3.42499	3.3154	3.66274	3.63704	3.68507	3.01026	3.20367	2.90858
ENSMUSG00000058881.14	Zfp516	6.59232	6.67727	6.54843	6.30129	6.22399	6.2611	6.38041	6.32415	6.31738	6.05785	6.00652	5.88205
ENSMUSG00000053768.14	Chchd3	6.41657	6.41127	6.49795	6.01321	6.00957	6.01303	6.20406	6.19084	6.24598	5.8499	5.88565	5.97568
ENSMUSG00000041417.16	Pik3r1	5.33672	5.35115	5.27779	5.99793	6.01881	5.93422	5.63956	5.52352	5.62721	6.09982	6.0904	5.90146
ENSMUSG00000062590.14	Armc9	4.04565	4.03867	4.02749	3.29386	3.2856	3.27383	3.36651	3.25755	3.34695	3.12589	2.92861	2.88146
ENSMUSG00000004032.11	Gstm5	4.62286	4.58903	4.61065	4.99049	4.93612	4.99576	4.33507	4.45048	4.40881	5.29414	5.27106	5.42755
ENSMUSG00000004798.15	Ulk2	6.64742	6.73505	6.68241	6.43612	6.53336	6.42061	6.31508	6.27668	6.29695	6.13129	6.20618	6.13421
ENSMUSG00000116138.2	C030006K11Rik	3.84897	3.76897	3.98822	3.04651	3.08311	3.22169	4.62775	4.73037	4.82641	2.7612	2.73274	2.82566
ENSMUSG00000004098.8	Col5a3	6.64351	6.4494	6.40818	8.38223	8.45222	8.40326	7.39073	7.5127	7.49831	7.62833	7.66021	7.50954
ENSMUSG00000032518.7	Rpsa	10.1848	10.1882	10.2063	9.26439	9.26711	9.2018	9.56204	9.59761	9.72936	9.45481	9.43099	9.60117
ENSMUSG00000000934.10	Top1mt	5.15714	5.08573	5.09763	4.70222	4.66257	4.77625	5.41335	5.37645	5.42036	4.44223	4.48387	4.44019
ENSMUSG00000003348.11	Mob3a	4.75206	4.72186	4.87889	5.5422	5.57047	5.62569	5.05018	5.15721	5.01288	5.47676	5.51124	5.57868
ENSMUSG00000057706.8	Mex3b	4.85379	4.90822	4.9316	5.89153	5.78659	5.75593	5.21431	5.24694	5.13605	5.56495	5.5923	5.524
ENSMUSG00000026879.15	Gsn	8.931	8.96008	8.95585	9.12324	9.06366	9.01649	8.73662	8.74174	8.73158	9.37361	9.33842	9.36764
ENSMUSG00000029163.10	Emilin1	8.31164	8.33898	8.35357	8.52234	8.45829	8.44424	8.05683	8.06234	8.06704	8.73722	8.73446	8.71494
ENSMUSG00000026029.15	Casp8	4.47214	4.42596	4.56867	5.11211	5.06805	5.18864	4.6743	4.70144	4.73995	5.1937	5.20523	5.17903
ENSMUSG00000084345.4	Rpl17-ps4	3.90017	3.81686	3.89999	2.71179	2.56133	2.51959	3.17263	3.1028	3.20188	2.73958	2.77039	2.84182
ENSMUSG00000082705.2	Gm15616	3.09566	3.21454	3.06346	1.46565	1.6224	1.60802	2.38606	2.18207	2.39086	1.56758	1.79339	1.65762
ENSMUSG00000021367.9	Edn1	3.27163	3.1883	3.22758	2.20784	2.33321	2.10447	4.11989	4.23297	4.27645	1.78723	2.08391	1.93131
ENSMUSG00000069972.7	Rps13-ps2	5.72593	5.81544	5.87792	4.83739	4.87289	5.12578	5.35382	5.22444	5.19641	4.80868	4.84222	4.88155
ENSMUSG00000035232.9	Pdk3	4.52698	4.51442	4.61194	5.34606	5.39474	5.36654	4.1266	4.39875	4.34114	5.34455	5.35337	5.45933
ENSMUSG00000098893.2	Gm17828	4.76172	4.58275	4.76268	3.86328	3.70914	3.82327	4.2408	4.18556	4.27488	3.75521	3.83889	3.85588
ENSMUSG00000062353.7	Gm15772	6.44608	6.49159	6.54708	5.48587	5.52273	5.49871	5.89476	5.9392	5.87515	5.77704	5.78026	5.97568
ENSMUSG00000047123.9	Ticam1	4.62683	4.64074	4.59374	4.20436	4.23938	4.1693	4.45856	4.36084	4.27645	3.85913	3.71308	3.81142
ENSMUSG00000043889.7	Gm8399	7.06695	7.01853	7.11473	6.85023	6.6966	6.6937	6.56866	6.65786	6.68209	6.43411	6.41758	6.50796
ENSMUSG00000059835.2	Rpl13-ps3	4.88285	4.76467	4.93263	3.67249	3.56531	3.61315	4.41262	4.41666	4.31377	4.00673	3.99492	4.10727
ENSMUSG00000038127.16	Ccdc50	7.27835	7.38356	7.2483	6.71404	6.74989	6.74105	6.99008	6.85535	6.8545	6.58698	6.63776	6.4389
ENSMUSG00000020572.9	Nampt	6.26901	6.3183	6.24867	5.7123	5.64961	5.60069	6.66343	6.65554	6.69452	5.78453	5.76775	5.78296
ENSMUSG00000004568.14	Arhgef18	7.10871	7.03495	7.07076	6.82213	6.84459	6.83922	7.24184	7.22115	7.21962	6.65593	6.59905	6.53244
ENSMUSG00000033192.6	Lpcat2	3.57536	3.60509	3.79011	4.34158	4.21304	4.21708	4.36234	4.1029	4.10433	4.72221	4.64049	4.71381
ENSMUSG00000072789.5	Gm10420	7.14122	7.08958	7.18415	6.20024	6.11366	6.02158	6.78903	6.8878	6.89225	6.17826	6.0136	6.2621
ENSMUSG00000061286.8	Exosc5	5.45829	5.30458	5.43501	4.81116	4.65744	4.78367	5.59247	5.58754	5.65534	4.65353	4.48614	4.65442
ENSMUSG00000037679.10	Inf2	6.44795	6.5208	6.48425	6.97846	6.98353	7.05199	6.21	6.18362	6.12084	7.06196	7.05875	6.94069
ENSMUSG00000001053.16	N4bp3	2.10229	2.01208	2.15779	3.25547	3.42741	3.55733	2.2877	2.6369	2.50281	3.54692	3.59425	3.4228
ENSMUSG00000020785.18	Camkk1	3.03322	3.24031	3.2072	3.64093	3.62961	3.61553	1.97464	1.7409	1.80257	4.18128	4.2279	4.22903
ENSMUSG00000090602.4	Gm5611	3.82844	3.99203	3.91682	2.82098	2.68753	2.65527	3.40842	3.29675	3.37958	2.52464	2.85693	2.65317
ENSMUSG00000030630.17	Fah	2.84157	2.83786	2.98184	3.29656	3.25603	3.29773	2.61329	2.60362	2.50281	3.87078	3.93651	3.92958
ENSMUSG00000024232.3	Bambi	1.17451	1.34985	1.31712	2.31305	2.2319	2.28269	1.51412	1.7409	1.7938	2.83443	2.74414	2.73335
ENSMUSG00000050395.10	Tnfsf15	3.02121	3.0274	2.91221	2.39607	2.59178	2.67365	4.03683	3.71034	3.87389	1.28865	1.56396	1.51368
ENSMUSG00000006740.15	Kif5b	7.93245	8.01353	7.91578	7.52235	7.63042	7.61698	7.74038	7.77248	7.69351	7.36013	7.31842	7.16124
ENSMUSG00000032803.16	Cdv3	7.72898	7.7379	7.7512	7.45543	7.52349	7.46746	8.07873	8.06256	8.05893	7.3672	7.32507	7.30355
ENSMUSG00000118238.2	Gm34432	4.45735	4.45514	4.54856	3.68699	3.58057	3.52226	4.07202	4.17912	4.04824	3.54277	3.5816	3.66464
ENSMUSG00000057894.11	Zfp329	5.18074	5.1104	5.08744	4.61176	4.77488	4.81195	4.74251	4.81173	4.80692	4.27068	4.2333	3.96322
ENSMUSG00000047921.18	Trappc9	6.15084	6.1291	6.17233	5.87625	5.86704	5.91407	5.83302	5.8102	5.83934	5.69281	5.6368	5.68556
ENSMUSG00000105388.2	Rpl36a-ps2	6.87001	6.79225	6.89347	5.95536	5.91599	5.87836	6.04002	6.06505	5.91465	6.12332	6.2144	6.30136
ENSMUSG00000003534.18	Ddr1	6.61781	6.63144	6.56554	6.90551	6.87254	6.81432	6.31324	6.30135	6.29967	7.17048	7.14494	7.03708
ENSMUSG00000031403.15	Dkc1	6.65132	6.69485	6.66881	6.43428	6.4768	6.46284	6.99696	7.01056	7.01037	6.23538	6.27098	6.19604
ENSMUSG00000063011.8	Msln	8.78565	8.75567	8.74173	8.13684	8.10515	8.01856	9.01489	9.00983	9.01235	8.23835	8.28229	8.35577
ENSMUSG00000118668.1	Rps6ka4	5.96891	5.93368	6.00288	6.29217	6.27347	6.28671	6.1853	6.33578	6.27031	6.48454	6.47315	6.51207
ENSMUSG00000020827.19	Mink1	6.81627	6.89088	6.88575	7.40528	7.35098	7.42673	6.74555	6.70878	6.73607	7.33617	7.34813	7.27965
ENSMUSG00000023277.14	Twf2	4.00962	3.92409	4.07325	4.66399	4.5847	4.66925	4.14985	4.3219	4.23976	4.9913	4.75946	4.95305
ENSMUSG00000033152.14	Podxl2	3.54771	3.4314	3.5169	4.70933	4.62311	4.51342	2.47289	2.74987	2.81625	4.56513	4.47706	4.58888
ENSMUSG00000084323.5	Gm14438	5.43055	5.47638	5.46106	4.50711	4.44635	4.37986	4.90062	4.9103	4.86673	4.77719	4.73491	4.86186
ENSMUSG00000022297.16	Fzd6	5.46422	5.55357	5.39202	5.02432	5.09639	4.99941	5.30289	5.23146	5.30387	4.83356	4.7604	4.74638
ENSMUSG00000116757.2	Gm4786	5.33429	5.34226	5.35159	4.44511	4.48626	4.43612	4.74687	4.91418	4.98519	4.44335	4.38419	4.61851
ENSMUSG00000041936.19	Agrn	6.76225	6.73392	6.68579	6.44407	6.38292	6.39488	7.14457	7.16582	7.05697	6.16074	6.04926	5.91776
ENSMUSG00000028923.15	Necap2	5.82024	5.68956	5.83485	5.2503	5.3642	5.33224	6.0747	6.11905	6.10674	5.1683	5.16552	5.20035
ENSMUSG00000036620.15	Mgat4b	7.16689	7.1693	7.19108	6.78651	6.80476	6.73695	7.03402	7.04196	7.06292	6.7558	6.77905	6.71054
ENSMUSG00000037331.16	Larp1	8.48449	8.52795	8.47448	8.32594	8.35968	8.38534	8.67543	8.76309	8.7615	8.08176	8.0594	7.9847
ENSMUSG00000085156.9	Snhg15	4.40899	4.40333	4.34134	3.76128	3.8704	3.7666	4.55624	4.65346	4.63697	3.39154	3.42518	3.62783
ENSMUSG00000005442.14	Cic	7.56848	7.5857	7.52602	7.9291	7.83823	7.84899	7.34615	7.32653	7.38088	8.08783	8.13971	7.98288
ENSMUSG00000026867.20	Gapvd1	7.54402	7.60101	7.54998	7.14934	7.17632	7.22574	7.4461	7.44015	7.37574	7.0503	7.11141	6.94163
ENSMUSG00000097296.2	Gm26532	3.95172	3.85697	3.93758	2.82473	3.02054	2.86575	3.10628	3.06488	3.19856	2.88783	2.88122	2.84583
ENSMUSG00000057329.8	Bcl2	4.4514	4.47427	4.40535	3.92223	4.07822	4.08082	3.943	3.986	4.08648	3.5386	3.49655	3.24579
ENSMUSG00000030685.6	Kctd13	4.38106	4.35254	4.29382	3.41574	3.61698	3.54988	4.14324	4.11813	4.0611	3.36118	3.49655	3.2609
ENSMUSG00000064369.1	mt-Te	2.79057	2.94752	2.79876	2.23063	2.56133	2.62253	2.15614	1.98937	1.99099	1.21744	1.33188	1.24857
ENSMUSG00000004843.8	Chmp2b	6.50371	6.5982	6.6447	6.10436	6.07223	6.10817	6.50956	6.41158	6.3235	5.93995	5.93123	6.02297
ENSMUSG00000021947.12	Cryl1	2.50446	2.27152	2.22013	3.34176	3.22584	3.38119	2.90241	3.0473	2.92072	3.55107	3.49205	3.64174
ENSMUSG00000030562.18	Nox4	4.46624	4.48778	4.46664	3.74554	3.80135	3.75801	4.30729	4.11645	4.28117	3.37293	3.59635	3.61847
ENSMUSG00000032300.8	1700017B05Rik	5.71416	5.65645	5.70402	5.95108	5.91599	5.95785	5.84629	5.85685	5.87359	6.20118	6.19203	6.12681
ENSMUSG00000015222.19	Map2	2.22608	2.37982	1.99298	3.82821	3.7347	3.64378	2.68323	2.87071	2.57118	3.69095	3.6719	3.48073
ENSMUSG00000001666.9	Ddt	4.01164	4.10504	3.96211	4.49186	4.4332	4.44417	4.32636	4.23452	4.35015	4.80868	4.7244	4.8874
ENSMUSG00000035890.10	Rnf126	6.31033	6.2478	6.34158	6.48138	6.4091	6.52585	6.41508	6.42559	6.46947	6.81601	6.77951	6.89204
ENSMUSG00000032508.9	Myd88	5.034	4.97594	4.97543	4.37009	4.2666	4.25419	5.24084	5.29836	5.31771	4.32493	4.33102	4.35265
ENSMUSG00000039458.16	Mtmr12	5.0587	4.98644	4.99339	5.42478	5.39227	5.43144	5.23697	5.26834	5.19224	5.64515	5.61213	5.54699
ENSMUSG00000086859.5	Snhg20	5.0945	4.96921	4.91179	4.2691	4.13101	4.29484	4.75772	4.74024	4.83071	4.21432	4.1671	4.23822
ENSMUSG00000000282.13	Mnt	6.36086	6.4456	6.35977	6.04451	5.94912	6.06791	6.12626	6.19683	6.24718	5.84358	5.76075	5.67149
ENSMUSG00000005102.14	Eif2ak4	6.17047	6.07643	6.17626	6.38813	6.37168	6.32464	6.27033	6.27819	6.2568	6.7116	6.69467	6.58561
ENSMUSG00000021365.16	Nedd9	5.67572	5.66122	5.60819	6.3023	6.42761	6.31003	5.78664	5.81851	5.80043	6.18227	6.20653	6.14443
ENSMUSG00000096712.2	Gm15454	4.09425	4.09272	4.248	3.04007	3.01413	3.04235	3.74354	3.67416	3.76808	3.15067	3.15041	3.27585
ENSMUSG00000022814.7	Umps	5.85111	5.74743	5.90401	6.11933	6.11366	6.09927	6.54881	6.63716	6.58336	6.35663	6.34926	6.41714
ENSMUSG00000025743.15	Sdc3	7.33869	7.35048	7.31449	7.66256	7.60572	7.50114	6.98962	7.05058	7.05559	7.86911	7.87059	7.7882
ENSMUSG00000037573.6	Tob1	4.36372	4.49716	4.42901	4.74837	4.83065	4.6144	4.22681	4.1012	4.16175	5.18572	5.20042	5.27889
ENSMUSG00000020400.18	Tnip1	5.35119	5.32881	5.24318	5.77907	5.6979	5.7188	5.45926	5.48683	5.41393	5.94034	5.84432	5.86287
ENSMUSG00000062980.16	Cped1	4.51704	4.62003	4.4566	4.16791	4.25441	4.13654	4.09445	4.06498	4.07565	3.56957	3.78289	3.61612
ENSMUSG00000027381.17	Bcl2l11	3.71118	3.74217	3.65119	4.78348	4.7208	4.71323	4.14655	3.95617	4.04639	4.48618	4.47933	4.45603
ENSMUSG00000094664.2	Rpl35a-ps6	5.12007	4.88186	5.14124	3.85962	3.70118	3.8518	4.58819	4.52982	4.43163	4.01875	3.9497	4.17423
ENSMUSG00000074480.5	Mex3a	6.55461	6.66721	6.54099	6.11359	6.07877	6.07916	6.13377	6.01213	6.08846	5.85619	5.85356	5.61617
ENSMUSG00000022031.7	Elp3	6.85796	6.91807	6.89666	6.62677	6.58129	6.59288	6.65794	6.57074	6.61578	6.47231	6.38458	6.43023
ENSMUSG00000003617.17	Cp	3.15917	3.07113	3.08967	1.44631	1.68829	1.77906	1.632	1.36311	1.34269	1.53448	1.67134	1.64845
ENSMUSG00000022312.12	Eif3h	9.40549	9.40638	9.43259	9.00585	9.01393	9.00059	9.11214	9.09836	9.12779	8.98216	8.96589	9.07983
ENSMUSG00000028191.12	Bcl10	5.65707	5.71563	5.79729	6.09391	6.13449	6.04736	5.96056	6.03148	6.01436	6.24404	6.24781	6.27183
ENSMUSG00000038776.14	Ephx1	5.29408	5.27606	5.2647	5.62842	5.63141	5.68635	5.07207	5.16212	5.05113	5.85787	5.91788	6.07902
ENSMUSG00000023800.16	Tiam2	5.99832	6.07687	6.10646	6.90063	6.92452	6.91963	5.90407	5.90887	5.85208	6.6648	6.70346	6.51931
ENSMUSG00000024190.8	Dusp1	5.61039	5.48853	5.61594	6.13905	6.07723	5.98294	5.74908	5.82058	5.80317	6.1406	6.16473	6.21129
ENSMUSG00000083914.4	Rps18-ps1	3.9496	4.17853	4.11578	2.97743	2.75057	2.91294	3.46247	3.47822	3.43708	2.97984	2.955	3.09209
ENSMUSG00000025920.20	Stau2	4.66979	4.81805	4.75685	4.25666	4.13101	4.22645	4.41125	4.37076	4.46795	4.00068	3.87908	4.01226
ENSMUSG00000040329.15	Il7	3.32147	3.64663	3.40803	4.48121	4.47696	4.51724	3.98976	3.9083	4.04269	4.35841	4.45179	4.52273
ENSMUSG00000030177.15	Ccdc77	4.38576	4.16177	4.3241	5.07165	5.04388	5.12745	4.44654	4.48353	4.51143	5.05906	5.03086	4.99612
ENSMUSG00000001630.14	Stk38l	5.04096	4.93214	4.96029	5.24261	5.24747	5.26639	5.03242	5.17674	5.23987	5.71653	5.61369	5.68276
ENSMUSG00000042851.18	Zc3h6	4.48678	4.42034	4.51993	3.89573	4.06278	3.84978	3.68564	3.85878	3.85292	3.58177	3.58583	3.51642
ENSMUSG00000079450.12	Cldn34c1	3.31163	3.46731	3.41693	2.90841	3.13424	3.02455	2.9674	3.03665	3.03314	2.24665	2.30524	2.16769
ENSMUSG00000097906.2	Gm9625	4.55781	4.48374	4.72495	3.56448	3.42257	3.45211	3.86489	3.92186	3.95683	3.65867	3.66192	3.7399
ENSMUSG00000023272.5	Creld2	4.98536	4.85605	4.95317	5.29898	5.33621	5.24811	5.12832	5.25155	5.16187	5.64564	5.53001	5.6464
ENSMUSG00000039159.17	Ube2h	7.70711	7.75685	7.67951	7.31566	7.33548	7.27322	7.60847	7.51286	7.6	7.29661	7.25377	7.20993
ENSMUSG00000041959.15	S100a10	6.84467	6.83832	6.90459	7.45241	7.40081	7.41226	6.55069	6.52385	6.64353	7.31439	7.34267	7.4274
ENSMUSG00000027281.17	Slx4ip	2.42765	2.23993	2.26682	3.70338	3.71902	3.72093	2.86277	2.78423	2.83348	3.45483	3.45323	3.29065
ENSMUSG00000028032.14	Papss1	5.89072	5.9138	5.90822	6.4349	6.35941	6.37043	6.06775	6.06549	6.01766	6.41321	6.41877	6.5895
ENSMUSG00000029174.19	Tbc1d1	5.52078	5.45934	5.51525	6.08846	6.03552	6.02695	5.8412	5.8679	5.89375	6.04578	6.04773	5.94841
ENSMUSG00000081865.2	Gm15484	3.37594	3.40031	3.08967	1.91595	1.6224	2.26461	2.65566	2.67402	2.55569	1.59994	1.56396	1.49335
ENSMUSG00000060198.8	Gm11353	6.93709	6.87477	6.94898	5.92205	6.0244	5.93803	6.42226	6.43609	6.35889	6.28162	6.21338	6.42856
ENSMUSG00000042156.17	Dzip1	6.37509	6.37684	6.35399	6.87667	6.88555	6.95552	5.98892	6.01122	6.09651	6.8295	6.81777	6.83589
ENSMUSG00000062421.14	Arf2	4.41819	4.389	4.50332	4.89917	4.97377	4.97275	4.77811	4.84974	4.70643	5.11261	5.09235	5.14361
ENSMUSG00000041506.16	Rrp9	5.72716	5.52109	5.67957	5.22782	5.17247	5.37989	5.92972	5.94206	6.0452	4.82503	4.81546	4.90866
ENSMUSG00000020457.14	Drg1	6.4783	6.49928	6.45106	6.20096	6.16084	6.17623	6.57542	6.58421	6.62013	6.05164	6.00533	6.06704
ENSMUSG00000001211.16	Agpat3	7.0887	7.05936	7.01324	6.77638	6.7849	6.76696	7.19413	7.22389	7.17617	6.66981	6.59066	6.57567
ENSMUSG00000063875.7	Rps6-ps1	4.03374	4.09095	4.06195	2.80967	2.80356	2.87769	3.32627	3.35791	3.52986	3.07212	3.0802	3.14517
ENSMUSG00000033610.17	Pank1	3.95593	3.94579	3.85267	4.2691	4.1919	4.16281	4.46916	4.32774	4.39872	4.68121	4.69436	4.62202
ENSMUSG00000062202.15	Btbd9	4.44091	4.62126	4.54586	4.18552	4.1919	4.1448	4.86093	4.95056	4.82102	3.82532	3.72271	3.69388
ENSMUSG00000075590.5	Nrbp2	6.67324	6.46724	6.5122	6.26965	6.23334	6.32027	6.27562	6.28832	6.35106	5.77216	5.90143	5.92678
ENSMUSG00000003228.10	Grk5	3.40398	3.3656	3.39006	4.73348	4.81783	4.61678	3.50171	3.70138	3.88013	4.42427	4.40469	4.39023
ENSMUSG00000021097.16	Clmn	6.36126	6.45009	6.30649	7.06405	7.10875	7.17785	6.74064	6.69784	6.69629	7.27109	7.23032	7.03533
ENSMUSG00000046949.17	Nqo2	3.29177	3.24668	3.31904	4.01708	4.03297	3.86785	3.72154	3.86882	3.75683	4.15566	4.16569	4.2995
ENSMUSG00000084149.2	Gm12944	3.53931	3.62723	3.73661	2.46498	2.35872	2.38104	2.89849	3.20462	3.03314	2.17864	2.27413	2.48838
ENSMUSG00000034902.18	Pip5k1c	6.6188	6.57275	6.62115	7.18497	7.18651	7.22788	6.90384	6.94563	7.00135	7.08233	7.04595	7.01342
ENSMUSG00000104028.2	Gm5851	3.34736	3.23391	3.34103	2.2419	2.06831	2.13132	2.76293	2.8011	2.7036	1.93407	2.04757	2.20567
ENSMUSG00000024620.12	Pdgfrb	7.90615	7.92865	7.94555	8.25231	8.26973	8.24344	8.20557	8.22936	8.21512	8.35707	8.34047	8.25807
ENSMUSG00000082895.2	Rpsa-ps9	6.09701	6.20058	6.27665	5.09513	4.94542	5.18624	5.53688	5.61762	5.53738	5.39729	5.43123	5.5089
ENSMUSG00000058793.15	Cds2	6.79231	6.7539	6.7646	6.32366	6.32292	6.31039	6.51213	6.46881	6.48829	6.35959	6.32194	6.21905
ENSMUSG00000112099.2	Gm8960	4.16147	3.98061	4.12123	3.07198	3.01413	3.05992	3.59176	3.50679	3.54824	3.01626	3.11865	3.20576
ENSMUSG00000047215.15	Rpl9	8.4085	8.44831	8.49905	7.58714	7.61435	7.58775	7.88949	7.89003	7.90519	7.7956	7.8325	8.01018
ENSMUSG00000019362.9	D8Ertd738e	6.07684	6.08667	6.18323	6.38623	6.30794	6.33839	6.55598	6.5343	6.53018	6.56793	6.60297	6.67291
ENSMUSG00000045629.9	Sh3tc2	2.98042	3.02369	3.1081	1.54055	1.55335	1.32371	3.53992	3.4437	3.54563	1.79424	1.84371	1.84572
ENSMUSG00000028975.17	Pex14	5.63096	5.54455	5.74229	5.26487	5.21501	5.10815	5.92972	5.96423	6.00012	4.92898	5.00424	4.94933
ENSMUSG00000019883.12	Echdc1	5.78692	5.88141	5.95378	6.2373	6.17204	6.23272	6.12793	6.00441	6.11337	6.41264	6.49242	6.44882
ENSMUSG00000027454.11	Gins1	1.37663	1.87897	1.99298	3.00744	3.01413	3.17084	2.20768	2.52961	2.22446	3.67585	3.40138	3.70055
ENSMUSG00000032324.12	Tspan3	6.67708	6.64959	6.66632	7.00907	6.97921	6.95646	6.38181	6.36161	6.29734	7.05414	7.10424	7.11523
ENSMUSG00000056228.11	Cars2	4.91243	4.81054	4.92849	5.42971	5.40519	5.39382	4.64421	4.70481	4.75246	5.5593	5.44933	5.5617
ENSMUSG00000085767.2	Gm13563	2.79057	2.85046	2.67562	2.15519	2.30723	2.37544	2.26963	2.18849	2.26948	1.29855	1.22747	0.728638
ENSMUSG00000024732.8	Ccdc86	5.41609	5.38042	5.49017	5.1825	5.22058	5.2792	5.95962	5.94063	5.93376	4.83356	4.81546	4.89807
ENSMUSG00000028675.13	Pnrc2	6.76255	6.80255	6.73703	6.59911	6.59451	6.64882	6.64046	6.62832	6.6815	6.28318	6.35267	6.34632
ENSMUSG00000090862.4	Rps13	7.53172	7.49563	7.56841	6.62166	6.62454	6.53373	6.98386	7.0364	7.09051	6.50551	6.46054	6.73563
ENSMUSG00000023067.15	Cdkn1a	3.97682	3.90408	3.77172	4.38668	4.45229	4.44818	3.0043	3.07878	3.31356	2.69534	2.60937	2.87755
ENSMUSG00000003814.9	Calr	9.03543	9.03526	9.03861	9.47647	9.4588	9.41688	9.27408	9.29733	9.31566	9.40374	9.37558	9.45118
ENSMUSG00000031660.14	Brd7	6.79643	6.78952	6.84016	6.41979	6.53616	6.52427	6.69622	6.66075	6.71878	6.35545	6.35701	6.32958
ENSMUSG00000085791.5	Rpl30-ps9	4.96355	4.90621	4.96738	3.99394	3.84173	3.90138	4.39328	4.30721	4.37096	4.06004	4.00601	4.26545
ENSMUSG00000031311.18	Nono	9.02744	9.05031	9.04041	8.69761	8.70075	8.72379	8.82804	8.7844	8.83907	8.6956	8.67429	8.70137
ENSMUSG00000055296.15	Tmem245	7.32512	7.33972	7.30253	6.915	6.9753	6.99351	7.11387	7.18724	7.09498	6.83185	6.86007	6.69255
ENSMUSG00000062456.5	Rpl9-ps6	6.48451	6.48082	6.49164	5.58263	5.53621	5.53937	5.92732	5.91227	5.91364	5.86454	5.74807	6.00603
ENSMUSG00000062582.7	Rpl30-ps8	5.16989	5.03602	5.12142	4.04307	3.96979	4.03001	4.49791	4.62531	4.57043	4.27194	4.33856	4.46128
ENSMUSG00000026887.10	Mrrf	5.05772	5.01938	5.00721	4.65243	4.74132	4.6931	5.20879	5.20158	5.24149	4.36313	4.46563	4.39572
ENSMUSG00000027424.12	Mgme1	3.31163	3.43698	3.44621	4.14709	4.11012	4.09111	3.56977	3.8768	3.84869	4.40837	4.30944	4.41745
ENSMUSG00000058600.14	Rpl30	8.81545	8.58901	8.78756	7.71693	7.74262	7.66256	8.30866	8.26505	8.21296	7.91575	7.92356	8.01141
ENSMUSG00000002006.13	Pdzd4	4.51132	4.40333	4.40535	5.13646	5.02248	5.05743	4.63483	4.54117	4.73766	5.18038	5.12323	5.20738
ENSMUSG00000037235.14	Mxd4	6.57427	6.57275	6.56487	7.00287	6.90017	6.89021	6.04844	5.95625	5.92675	7.0971	7.13991	7.02629
ENSMUSG00000025702.16	Marchf8	6.4669	6.44802	6.37088	6.11244	6.10728	6.15185	6.25088	6.10212	6.16958	5.91163	5.91997	5.82576
ENSMUSG00000037089.12	Slc35b2	5.47967	5.52371	5.58798	5.92729	5.89084	5.84733	5.91332	5.86339	5.91668	6.03177	6.02571	6.02916
ENSMUSG00000083481.5	Rps8-ps2	4.87509	4.85396	4.87996	3.82446	3.89328	3.84978	4.29542	4.34654	4.22351	4.10301	4.13427	4.24584
ENSMUSG00000042751.15	Nmnat2	1.03808	0.8279	1.06871	2.72389	2.93491	2.79615	1.28136	1.75829	1.4359	2.66125	2.60104	2.59236
ENSMUSG00000068579.6	Rpl7a-ps3	3.84671	3.85489	3.80601	2.96388	2.95178	2.96237	3.28187	3.37492	3.36484	2.88455	2.97449	2.91623
ENSMUSG00000027808.9	Serp1	7.58677	7.5753	7.61265	7.51381	7.48751	7.43129	7.40236	7.42134	7.36707	7.14106	7.21573	7.17746
ENSMUSG00000026516.9	Nvl	6.53326	6.43866	6.45718	6.29149	6.34352	6.39868	6.1667	6.23031	6.17043	5.9685	6.01634	5.9367
ENSMUSG00000007659.19	Bcl2l1	5.71167	5.74236	5.71248	5.08109	5.16309	5.11152	6.08421	6.11652	6.26951	5.15679	5.04321	5.0397
ENSMUSG00000060969.10	Irx1	5.60704	5.44348	5.59714	4.95756	5.01448	4.91308	5.79403	5.6981	5.69654	4.84626	4.93797	4.83183
ENSMUSG00000027884.17	Clcc1	5.2163	5.15002	5.3211	5.70367	5.77242	5.75593	5.07814	5.09869	5.05481	5.82402	5.77749	5.87666
ENSMUSG00000039850.17	Endov	5.45977	5.36073	5.33055	4.80548	4.82151	4.96531	5.26765	5.17593	5.10001	4.52039	4.70217	4.55619
ENSMUSG00000063696.8	Gm8730	6.67835	6.56097	6.76895	5.58319	5.50912	5.54562	5.9104	6.03058	6.00726	5.757	5.65302	5.90146
ENSMUSG00000020471.12	Pold2	4.97709	5.01004	4.98244	5.42169	5.23512	5.2919	5.10047	5.14982	5.22199	5.62318	5.62092	5.67713
ENSMUSG00000040795.13	Iqcc	3.16282	3.03846	3.14785	4.10915	4.16901	4.13323	3.74354	3.70363	3.79911	3.91807	4.06173	3.96137
ENSMUSG00000022680.15	Pdxdc1	6.96166	7.03403	7.02031	6.73811	6.80476	6.78266	6.86172	6.79318	6.8206	6.52434	6.59092	6.4577
ENSMUSG00000049313.9	Sorl1	3.07644	3.20148	2.81231	4.36495	4.34912	4.29187	2.56963	2.44623	2.48656	4.19591	4.33605	4.05101
ENSMUSG00000024527.11	Afg3l2	6.02061	6.01757	5.98354	5.8785	5.85453	5.88627	6.24164	6.20438	6.17043	5.56033	5.57059	5.51269
ENSMUSG00000067344.8	Rps25-ps1	4.42124	4.40047	4.60157	3.3754	3.38084	3.6012	3.99527	3.80959	3.86554	3.419	3.33006	3.5389
ENSMUSG00000040022.15	Rab11fip2	6.09223	6.2262	6.15204	5.74632	5.76098	5.63216	6.37267	6.37435	6.40968	5.58984	5.58704	5.42353
ENSMUSG00000026095.16	Asnsd1	5.63556	5.73615	5.63577	5.39355	5.35789	5.33079	5.54316	5.4625	5.51419	5.13349	5.1005	5.11977
ENSMUSG00000008206.17	Cers4	4.47214	4.51442	4.45517	5.02758	4.92164	4.97182	4.10298	4.29535	4.15662	5.21866	5.19212	5.12721
ENSMUSG00000025935.11	Tram1	6.00748	6.10257	6.06271	6.4793	6.5448	6.4635	5.82891	5.78762	5.80208	6.52724	6.5181	6.49715
ENSMUSG00000023909.5	Paqr4	2.60448	2.63425	2.69526	3.86145	3.67094	3.67376	2.45167	2.20126	2.23098	3.68153	3.78474	3.7613
ENSMUSG00000024420.10	Zfp521	3.81921	3.66815	3.69331	5.25587	5.19673	5.20848	4.0261	4.2063	4.06475	4.48184	4.46678	4.473
ENSMUSG00000033060.17	Lmo7	4.49259	4.52495	4.3429	5.05976	4.99345	4.91598	5.06772	5.04745	4.89573	5.32048	5.34653	5.16143
ENSMUSG00000003865.17	Gys1	5.70167	5.69539	5.76338	5.54447	5.52555	5.54312	5.8982	5.92724	5.97414	5.2167	5.2073	5.2557
ENSMUSG00000034453.9	Polr3b	5.58748	5.60468	5.56414	5.25587	5.3686	5.32499	5.83148	5.84825	5.82434	5.01099	5.01212	4.82473
ENSMUSG00000029415.5	Sdad1	6.09032	6.04204	6.11332	5.81581	5.83011	5.82694	6.3702	6.44719	6.33715	5.60536	5.56846	5.46129
ENSMUSG00000036503.14	Rnf13	6.62576	6.60441	6.76227	6.36353	6.3654	6.39384	6.90701	6.85535	6.8319	6.14335	6.1802	6.16987
ENSMUSG00000040482.17	Dxo	4.45289	4.27207	4.37065	4.66085	4.5563	4.58071	4.56244	4.71486	4.65889	5.05906	5.08713	5.16384
ENSMUSG00000050069.4	Grem2	5.32373	5.18528	5.30361	6.17107	6.19666	6.0394	5.65705	5.90546	5.84732	6.12192	6.13329	6.05409
ENSMUSG00000032078.18	Zpr1	6.00189	6.08223	6.13551	5.73291	5.7451	5.70099	6.18611	6.22992	6.26436	5.53336	5.5201	5.60556
ENSMUSG00000066902.8	Rps23-ps2	6.74196	6.75614	6.8238	5.7118	5.66555	5.65894	6.13377	6.10765	6.02986	5.6801	5.67651	5.96971
ENSMUSG00000031546.7	Gins4	4.98844	5.06875	5.18184	5.63804	5.61191	5.78158	5.35311	5.36017	5.40963	5.75071	5.71466	5.76877
ENSMUSG00000020547.6	Bzw2	6.53503	6.59633	6.56821	6.16665	6.19064	6.20336	6.38426	6.40054	6.37111	6.1254	6.12423	6.18698
ENSMUSG00000027006.14	Dnajc10	6.74135	6.82827	6.82435	7.26773	7.27394	7.23679	6.97575	7.04594	6.96955	7.22693	7.28727	7.20857
ENSMUSG00000001555.11	Fkbp10	7.33222	7.37431	7.38384	7.89427	7.8475	7.83884	7.5388	7.55264	7.62866	7.74924	7.7637	7.8125
ENSMUSG00000053117.12	E330013P04Rik	3.29177	3.51295	3.45775	1.72846	2.21523	1.95468	2.61806	2.51434	2.56604	2.044	1.92608	2.08182
ENSMUSG00000085342.2	Gm12254	5.58272	5.58596	5.59975	4.77672	4.69899	4.71656	5.15236	5.09954	5.11771	4.85968	4.87887	5.06229
ENSMUSG00000026426.11	Arl8a	6.1568	6.1699	6.19017	5.62035	5.64651	5.70211	5.89181	5.90741	5.97171	5.6601	5.62246	5.734
ENSMUSG00000031963.9	Bmper	0.699114	1.03348	1.06871	2.61114	2.57446	2.24631	2.04008	2.43547	2.20473	2.60655	2.80708	3.00505
ENSMUSG00000039835.17	Nhsl1	4.65172	4.64195	4.64767	5.03812	5.1456	5.07396	4.93256	4.83957	4.91812	5.41331	5.36449	5.21128
ENSMUSG00000061589.15	Dot1l	6.68122	6.54717	6.57783	6.86168	6.82824	6.78952	6.77735	6.90571	6.89994	7.16238	7.19632	7.08073
ENSMUSG00000020836.16	Coro6	2.88199	2.93574	2.92474	0.978844	0.906009	0.709052	1.29334	1.32861	2.0585	0.75413	0.495839	0.923517
ENSMUSG00000030862.14	Cpxm2	2.43371	2.48056	2.49689	3.01403	3.17791	3.05292	3.28787	3.3721	3.51391	3.56137	3.54297	3.47556
ENSMUSG00000015202.14	Cnksr3	5.07719	5.11997	5.08744	5.50001	5.48846	5.42331	5.16546	5.3102	5.33218	5.76683	5.70303	5.65729
ENSMUSG00000037364.13	Srrt	6.72292	6.69076	6.73258	6.95255	6.91229	7.02271	6.54663	6.45488	6.55214	7.18305	7.17613	7.14546
ENSMUSG00000056851.15	Pcbp2	9.68752	9.73901	9.71815	9.2813	9.27756	9.31014	9.42517	9.41254	9.43817	9.3706	9.35718	9.39271
ENSMUSG00000038366.16	Lasp1	6.7077	6.77196	6.73347	7.03904	6.97757	6.97742	6.60215	6.52576	6.5609	7.20639	7.17314	7.12805
ENSMUSG00000116090.2	Rpl19-ps6	4.85943	4.81162	4.79831	3.81318	3.82718	3.69417	4.4181	4.42349	4.42169	3.92766	3.89961	4.16783
ENSMUSG00000027860.16	Vangl1	4.4514	4.48104	4.51993	4.86315	4.89049	4.9681	4.60871	4.73367	4.6601	5.11471	5.13554	5.08963
ENSMUSG00000097354.8	2310001H17Rik	4.30547	4.35549	4.35992	3.65785	3.61274	3.67376	2.92952	2.94472	2.86734	3.49625	3.59005	3.40114
ENSMUSG00000001774.9	Chordc1	6.64024	6.72966	6.69709	6.40983	6.41581	6.48578	6.57818	6.52067	6.46947	6.21136	6.2371	6.22945
ENSMUSG00000040133.3	Gpr176	6.41313	6.35599	6.36476	6.0826	6.13634	6.10859	6.66227	6.6953	6.71414	5.95879	5.97341	5.94514
ENSMUSG00000004043.15	Stat5a	5.25443	5.30763	5.25315	5.67019	5.6135	5.66699	5.13583	5.05451	5.05573	5.77527	5.80541	5.77193
ENSMUSG00000105031.2	Gm3511	3.73345	3.75339	3.85704	2.79061	2.66316	2.7186	3.03316	2.97106	3.1094	2.71394	2.75169	2.86574
ENSMUSG00000027406.14	Idh3b	6.79408	6.80822	6.78451	6.2228	6.17815	6.16043	6.56434	6.52512	6.62199	6.31002	6.25015	6.39026
ENSMUSG00000039114.17	Nrn1	1.863	1.92737	1.68448	2.69958	2.93151	2.90906	1.06085	1.25702	1.42457	3.25087	3.23093	3.11222
ENSMUSG00000026005.16	Rpe	5.54616	5.61887	5.6345	4.89025	4.92079	4.91598	5.41951	5.41943	5.46597	5.01249	4.98035	5.10059
ENSMUSG00000050628.7	Ubald2	4.79738	4.81805	4.80397	5.14173	5.17247	5.10222	4.8967	4.94108	5.07125	5.42069	5.39192	5.45737
ENSMUSG00000024268.17	Celf4	4.31206	4.31363	4.3553	3.15179	3.06462	3.36431	3.59419	3.57461	3.61205	3.27613	3.45785	3.35402
ENSMUSG00000094497.2	Gm8210	4.34296	4.37598	4.50332	3.46464	3.36077	3.36431	4.07896	4.08234	3.98602	3.45483	3.54079	3.64635
ENSMUSG00000018474.19	Chd3	7.56745	7.63055	7.532	7.80856	7.79473	7.79058	7.41509	7.41536	7.40161	8.11354	8.10542	7.94888
ENSMUSG00000020695.15	Mrc2	6.87419	6.82481	6.85333	7.4413	7.47619	7.32137	7.03179	7.04129	6.96833	7.38341	7.37266	7.28778
ENSMUSG00000013736.17	Trnt1	6.12066	6.15177	6.04894	5.84796	5.88427	5.83411	6.31324	6.26722	6.22041	5.63738	5.63833	5.62145
ENSMUSG00000032621.9	Srek1	6.69041	6.7539	6.66664	6.92508	6.98967	7.00444	6.47383	6.5531	6.4784	7.20014	7.24894	7.11834
ENSMUSG00000090544.4	Gm6576	5.05379	4.90218	5.03156	4.01379	3.99279	3.87779	4.64187	4.78759	4.82641	3.97778	3.89961	4.22287
ENSMUSG00000057696.5	Rpl30-ps1	4.77966	4.63953	4.76035	3.69725	3.65661	3.6577	4.16785	4.29683	4.21696	3.8774	3.83535	4.05101
ENSMUSG00000085385.8	Snhg17	6.11831	6.10914	6.1841	5.82052	5.81221	5.94986	6.53564	6.52861	6.50553	5.5777	5.65704	5.49937
ENSMUSG00000034245.11	Hdac11	4.37321	4.4161	4.57663	3.40827	3.33272	3.40888	3.51967	3.6901	3.51124	3.50054	3.46246	3.62783
ENSMUSG00000049225.15	Pdp1	3.45845	3.43698	3.56574	4.1214	4.14427	3.99572	3.86288	3.69462	3.78368	4.32372	4.29013	4.3184
ENSMUSG00000059674.8	Cdh24	4.06138	4.0202	3.98623	4.91245	4.7481	4.81403	4.44386	4.39459	4.46657	4.69157	4.71767	4.67035
ENSMUSG00000027684.17	Mecom	6.34207	6.37356	6.31008	6.71429	6.66805	6.68778	6.76154	6.76792	6.69952	6.77031	6.83141	6.73374
ENSMUSG00000043391.11	2510009E07Rik	3.97266	4.04782	3.86139	4.63331	4.58361	4.50318	3.5869	3.65572	3.68031	4.73774	4.78267	4.65098
ENSMUSG00000091957.4	Rps2-ps10	7.49509	7.47033	7.57869	6.53988	6.49906	6.39245	7.15055	7.26229	7.20604	6.52091	6.34458	6.62087
ENSMUSG00000025366.9	Esyt1	7.63405	7.61432	7.62118	7.26911	7.28928	7.29805	7.38497	7.30044	7.34076	7.24431	7.26897	7.24474
ENSMUSG00000070576.5	Mn1	5.93675	5.9133	5.992	6.60021	6.60628	6.69623	6.27071	6.34192	6.26991	6.58471	6.52086	6.3995
ENSMUSG00000033767.15	Tmem131l	5.53493	5.5619	5.49157	5.88346	5.80202	5.86892	5.38634	5.34298	5.31771	6.17054	6.14121	5.98889
ENSMUSG00000031371.15	Haus7	4.02775	4.14822	4.27436	4.52336	4.59869	4.52991	4.44654	4.38062	4.5141	4.9178	4.92884	5.12721
ENSMUSG00000116648.2	Rpl31-ps12	4.27713	4.20821	4.21266	2.99084	3.18077	3.08073	3.54994	3.54736	3.59699	2.99817	3.06513	3.37638
ENSMUSG00000062683.12	Atp5g2	7.3399	7.31169	7.39327	6.77662	6.69635	6.73449	6.93571	6.94255	6.903	6.76028	6.76816	6.94046
ENSMUSG00000028207.19	Asph	6.67004	6.67933	6.69069	7.14071	7.13039	7.13641	7.15343	7.13745	7.11494	7.10294	7.11854	7.01698
ENSMUSG00000081926.2	Gm15536	3.38535	3.4536	3.45487	2.5076	2.44226	2.41422	2.8466	2.87071	2.91264	2.48187	2.38507	2.30813
ENSMUSG00000100944.2	Gm28900	3.088	3.06754	3.07099	1.99797	1.91161	2.03508	2.6037	2.54972	2.64624	1.9467	1.73366	1.98324
ENSMUSG00000033039.11	Micall1	6.73768	6.69863	6.69557	6.45621	6.55642	6.54032	6.54819	6.56581	6.52356	6.21169	6.27851	6.0985
ENSMUSG00000110057.2	Gm2225	4.40283	4.32722	4.30185	3.36513	3.42015	3.18692	3.78866	3.83234	3.80349	3.29354	3.46705	3.50884
ENSMUSG00000047793.14	Sned1	4.83675	4.67303	4.68744	5.66758	5.55012	5.79056	4.33217	4.26678	4.33662	5.44927	5.57379	5.45408
ENSMUSG00000083097.4	Gm14494	5.55591	5.57271	5.57875	4.71339	4.74423	4.99393	5.38284	5.17269	5.33823	4.72771	4.766	4.76769
ENSMUSG00000046447.4	Camk2n1	3.6911	3.64422	3.7103	2.6198	2.49384	2.55472	2.35782	2.48852	2.6067	2.5414	2.67833	2.63937
ENSMUSG00000026308.9	Klhl30	0.922254	1.13313	0.909664	0.612963	0.184553	0.346225	2.214	2.35203	2.61669	2.66507	2.94187	2.61135
ENSMUSG00000026875.15	Traf1	1.085	0.685088	1.09852	3.80181	3.69718	3.1114	2.58433	2.95983	2.84202	4.26312	4.23734	4.28627
ENSMUSG00000041841.9	Rpl37	8.84359	8.69407	8.84281	7.72623	7.68364	7.57068	8.18411	8.24794	8.17227	7.86068	7.84358	8.01965
ENSMUSG00000022159.17	Rab2b	4.36531	4.35254	4.45372	4.02525	4.05655	4.11821	4.09786	4.14647	4.02967	3.61183	3.62129	3.71159
ENSMUSG00000019979.13	Apaf1	5.28908	5.28305	5.27453	5.85118	5.95792	5.92514	5.49016	5.49852	5.46735	5.91042	5.90735	5.73779
ENSMUSG00000084314.2	Rps15a-ps3	3.47028	3.52348	3.70305	2.37063	2.2429	1.96964	2.74995	2.94091	2.73145	2.26189	2.20982	2.31972
ENSMUSG00000035473.11	Galm	3.52236	3.66101	3.7271	3.77298	3.8381	4.00118	3.16613	3.21095	3.07359	4.53406	4.49516	4.65098
ENSMUSG00000040265.17	Dnm3	0.594887	0.371966	0.364488	1.97115	1.6224	1.84542	1.46201	0.988947	1.05013	2.40612	2.34571	2.15481
ENSMUSG00000046314.17	Stxbp6	2.79057	2.88355	2.71944	3.81883	3.73275	3.65075	3.19196	3.23909	3.07359	3.82532	3.71115	3.774
ENSMUSG00000043613.9	Mmp3	3.80059	3.30584	3.42871	5.98458	6.00675	5.97556	5.26309	4.95905	4.93219	6.4802	6.49439	6.52182
ENSMUSG00000046623.9	Gjb4	2.13982	2.19452	2.247	2.98079	3.09834	2.8375	1.84229	1.59369	1.48034	3.39845	3.48301	3.42011
ENSMUSG00000071176.11	Arhgef10	6.74653	6.71336	6.73673	7.09408	7.10159	7.10013	7.02575	6.99161	6.95387	7.11558	7.15137	7.08562
ENSMUSG00000009035.16	Tmem184b	6.86554	6.75111	6.87905	7.34158	7.27762	7.24948	6.935	7.07854	7.05514	7.34081	7.33531	7.33548
ENSMUSG00000014551.9	Mrps25	4.30051	4.24686	4.40833	5.09978	4.95883	5.10307	4.85184	4.84466	4.76487	5.01849	4.98195	5.00243
ENSMUSG00000026890.20	Lhx6	3.42236	3.39745	3.35344	4.16051	3.92095	3.94176	3.19834	2.85463	3.20188	4.41407	4.44133	4.44152
ENSMUSG00000027351.15	Spred1	5.89841	5.94204	5.86822	6.50231	6.57994	6.50899	6.07644	6.14489	6.12959	6.37223	6.41045	6.31734
ENSMUSG00000027932.15	Slc27a3	2.85065	2.6391	2.82128	3.61949	3.47252	3.4915	2.10948	2.14288	2.06581	3.77484	3.71308	3.85389
ENSMUSG00000029253.13	Cenpc1	5.01696	4.85188	4.92745	5.44624	5.49997	5.49999	4.73704	4.81693	4.68286	5.54015	5.58809	5.5215
ENSMUSG00000058388.15	Phtf1	5.29242	5.40697	5.27779	5.62573	5.62511	5.66124	5.00355	5.01437	5.03167	5.83468	5.82477	5.85989
ENSMUSG00000042428.7	Mgat3	5.17171	5.19519	5.07062	5.60298	5.51934	5.54124	4.93161	4.74352	4.86987	5.86704	5.83058	5.71876
ENSMUSG00000047428.15	Dlk2	3.36331	3.26248	3.42283	3.75343	3.57187	3.64144	3.7479	3.60135	3.56382	4.26942	4.2333	4.21979
ENSMUSG00000029385.15	Ccng2	5.81677	5.78894	5.75053	6.02996	6.03631	5.95598	5.05546	5.0867	5.03911	6.23956	6.27164	6.21556
ENSMUSG00000031734.14	Irx3	3.9326	4.02576	4.04865	3.28572	3.28027	3.46008	3.67652	3.67873	3.70627	3.10349	3.08319	3.17099
ENSMUSG00000074108.2	Rpl10-ps2	4.13384	4.119	4.19552	3.32861	3.19784	3.22481	3.48091	3.47559	3.43426	3.23808	3.21736	3.38744
ENSMUSG00000072582.10	Ptrh2	5.38361	5.48247	5.48665	5.19487	5.19106	5.26336	5.91719	5.85281	5.89888	4.68969	4.88318	4.86582
ENSMUSG00000041801.6	Phlda3	5.36155	5.33106	5.45531	5.92947	5.92712	5.90243	5.45926	5.51843	5.60355	5.92606	5.88307	5.95074
ENSMUSG00000001034.18	Mapk7	5.40612	5.31675	5.32819	5.54049	5.53733	5.46018	5.49276	5.41121	5.59977	5.90436	5.92332	5.94747
ENSMUSG00000111613.2	Gm4977	3.46142	3.50765	3.6078	2.5076	2.25926	2.25854	2.63227	2.60842	2.74518	2.41524	2.35069	2.43609
ENSMUSG00000030245.11	Golt1b	6.2408	6.15431	6.24493	6.55039	6.53951	6.47468	6.39055	6.41672	6.45109	6.67765	6.63521	6.76162
ENSMUSG00000011831.17	Evi5	6.73982	6.79442	6.74736	6.4173	6.47184	6.47632	6.66746	6.56365	6.63863	6.35752	6.32795	6.30537
ENSMUSG00000036992.11	Nxt1	4.10567	4.03315	4.13388	4.536	4.41385	4.52359	4.42493	4.40705	4.41312	4.69438	4.77251	4.84692
ENSMUSG00000021218.11	Gdi2	8.48449	8.54154	8.51165	8.16235	8.17675	8.14478	8.27148	8.2277	8.2226	8.15258	8.12144	8.19152
ENSMUSG00000056201.9	Cfl1	9.53919	9.5497	9.59277	9.8397	9.87164	9.82603	9.69595	9.72929	9.74595	9.94773	9.93039	10.0732
ENSMUSG00000059182.9	Skap2	6.21026	6.26123	6.25116	5.91327	5.87059	5.84124	5.84069	5.7337	5.72337	5.76816	5.7821	5.69893
ENSMUSG00000056596.9	Trnp1	5.77624	5.73785	5.80522	4.31782	4.22973	4.56602	4.8376	4.61937	4.78604	4.21432	4.27319	4.51771
ENSMUSG00000022142.9	Nup155	6.94533	6.92032	6.9185	7.31166	7.37384	7.35948	7.08056	7.17354	7.12087	7.44148	7.46309	7.30392
ENSMUSG00000023048.14	Prr13	5.78041	5.8036	5.77784	6.09041	6.0224	6.13371	5.46589	5.41327	5.46666	6.22731	6.24447	6.32383
ENSMUSG00000041571.11	Selenow	6.59839	6.46486	6.54302	6.2196	6.13781	6.19782	6.82351	6.85105	6.86108	6.03916	6.10189	6.08413
ENSMUSG00000022325.15	Pop1	5.21981	5.34077	5.22387	5.3986	5.45217	5.49289	5.45593	5.47898	5.43667	4.69905	4.70315	4.61968
ENSMUSG00000079470.9	Utp14b	2.30748	2.01954	1.91973	3.25824	3.36582	3.18372	1.50385	1.57419	1.4359	4.02769	4.01388	3.47037
ENSMUSG00000047407.18	Tgif1	7.21669	7.25594	7.27343	7.01277	7.05961	7.11954	7.04225	7.05477	7.05238	6.87319	6.8467	6.82779
ENSMUSG00000050931.8	Sgms2	4.47361	4.45101	4.62991	5.35192	5.5278	5.42603	4.68797	4.91709	4.86359	5.33977	5.29644	5.2572
ENSMUSG00000051768.10	Xrcc1	5.83633	5.76196	5.77092	6.02955	6.02997	6.0826	5.01896	5.12574	5.24713	6.31703	6.35422	6.36811
ENSMUSG00000000938.12	Hoxa10	5.53352	5.47367	5.57146	6.20024	6.13929	6.19544	5.31763	5.23845	5.22771	6.10687	6.11145	5.97339
ENSMUSG00000024829.13	Mrpl21	5.61506	5.54519	5.61659	5.18615	5.10848	5.00849	5.74744	5.79659	5.77278	4.83441	4.86241	5.04581
ENSMUSG00000036291.7	Ap5m1	5.26381	5.38259	5.25894	4.76115	4.77961	4.72539	4.87992	4.91709	4.85518	4.55381	4.7444	4.53646
ENSMUSG00000115188.2	Gm46522	4.07887	4.17352	3.97422	3.24431	3.16928	3.1676	3.58447	3.60376	3.81655	3.06923	3.15041	3.13864
ENSMUSG00000020092.10	Pald1	4.15599	4.00524	4.09929	4.65454	4.48162	4.58436	3.66964	3.88276	3.86344	4.94087	4.83602	4.8569
ENSMUSG00000030560.18	Ctsc	3.95803	4.01274	4.01973	2.99418	3.22306	3.16435	4.76419	4.72816	4.81561	2.98598	3.22823	3.00145
ENSMUSG00000053137.8	Mapk11	3.09566	3.07472	3.41693	4.39931	4.35801	4.41306	3.41392	3.73909	3.83378	4.47204	4.50859	4.59724
ENSMUSG00000028676.18	Srsf10	7.31715	7.29123	7.33302	7.00267	7.01897	7.10332	7.10391	7.22154	7.16068	6.76809	6.88581	6.86386
ENSMUSG00000024614.8	Tmx3	6.97132	6.98415	6.97382	6.75491	6.70259	6.67956	6.79247	6.74466	6.73578	6.53301	6.59092	6.43956
ENSMUSG00000041957.16	Pkp2	5.38205	5.37534	5.38901	4.70832	4.71883	4.56971	4.83042	4.85581	4.81561	4.83185	4.65465	4.72257
ENSMUSG00000027405.17	Nop56	7.90724	7.90039	7.94171	7.62541	7.64566	7.66069	8.05617	8.09414	8.10811	7.56379	7.56435	7.5907
ENSMUSG00000025135.13	Anapc11	5.45977	5.43444	5.51179	6.05532	6.00917	6.05658	5.56494	5.61464	5.69064	5.96035	5.93704	6.03971
ENSMUSG00000050912.16	Tmem123	7.7342	7.7386	7.72427	7.59155	7.59475	7.57145	7.52235	7.51206	7.47705	7.30997	7.40877	7.36863
ENSMUSG00000032245.13	Cln6	4.99563	5.07235	4.94088	4.45966	4.48741	4.48378	4.6628	4.69243	4.67929	4.40494	4.42608	4.43354
ENSMUSG00000050229.4	Pigm	4.90808	4.96052	4.79944	4.57327	4.51605	4.50446	4.74469	4.70144	4.63942	4.19193	4.29013	4.17742
ENSMUSG00000018974.8	Sart3	5.93675	5.86856	5.91242	6.14205	6.11291	6.2187	6.14166	6.04792	6.10762	6.50551	6.4481	6.34171
ENSMUSG00000067288.14	Rps28	7.98611	7.89483	8.00111	6.94223	6.97839	6.88184	7.30385	7.25312	7.25463	7.02203	7.02274	7.26661
ENSMUSG00000028896.14	Rcc1	4.87174	4.82658	4.96029	5.5743	5.54901	5.5783	5.11994	5.27892	5.31004	5.51704	5.50678	5.48658
ENSMUSG00000026185.9	Igfbp5	3.36648	3.10308	3.11541	5.70367	5.73198	5.53497	4.90258	5.01074	4.96774	4.03954	4.12267	4.0423
ENSMUSG00000071984.12	Fndc1	4.73008	4.54963	4.51718	6.64146	6.79054	6.44556	6.1039	6.16418	6.13046	6.45444	6.39847	6.28371
ENSMUSG00000020841.6	Cpd	6.37154	6.39702	6.43982	6.62004	6.67974	6.60909	6.58093	6.56272	6.55993	6.98595	6.96527	6.79366
ENSMUSG00000044408.8	Sptssa	5.48987	5.51516	5.52076	6.07435	5.9848	6.08217	5.10558	5.1992	5.03911	5.99193	6.11585	6.15498
ENSMUSG00000081810.2	Gm11878	4.52981	4.17185	4.51442	3.25547	3.06772	3.03526	3.98238	3.96369	3.87389	3.33499	3.41333	3.31112
ENSMUSG00000031442.22	Mcf2l	3.19882	2.92386	3.01738	4.00059	4.02502	4.02464	2.0752	1.92923	1.7938	4.19459	4.04953	3.99067
ENSMUSG00000015095.13	Fbxw5	6.00748	5.93368	6.00436	6.32465	6.27916	6.3445	6.13544	6.17596	6.14131	6.40837	6.56384	6.63341
ENSMUSG00000029014.15	Dnajc2	5.94048	6.00541	6.01221	5.67227	5.69139	5.70099	6.19451	6.20953	6.19313	5.56393	5.56899	5.484
ENSMUSG00000022685.10	Parn	5.85111	5.94155	5.92807	5.56984	5.53005	5.4648	5.64015	5.73425	5.65171	5.39094	5.39252	5.42151
ENSMUSG00000042106.6	Inka1	1.79876	1.83736	1.72326	2.59805	2.66725	2.55967	2.65101	2.56462	2.6608	2.86471	2.86391	3.00863
ENSMUSG00000028300.15	C9orf72	5.27059	5.36732	5.25811	4.82246	4.84336	4.74291	5.13333	4.91902	4.94016	4.61941	4.62516	4.60318
ENSMUSG00000026179.15	Pnkd	4.06724	4.06955	3.99418	4.20003	4.33119	4.33292	3.8709	3.89853	3.65145	4.786	4.83068	4.95862
ENSMUSG00000022403.16	St13	8.70893	8.79723	8.76747	8.44944	8.48641	8.49486	8.60989	8.56065	8.57973	8.41278	8.40838	8.40062
ENSMUSG00000022370.14	Mrpl13	6.52301	6.47642	6.55952	6.4117	6.31219	6.41482	6.75235	6.75471	6.66203	5.94034	5.96247	6.08752
ENSMUSG00000028772.20	Zcchc17	3.83073	3.92011	3.92931	4.39301	4.52959	4.5487	4.32344	4.38203	4.29368	4.54345	4.58663	4.63251
ENSMUSG00000029772.18	Ahcyl2	5.56283	5.67723	5.64779	5.11747	5.12938	5.18944	5.26233	5.23999	5.23421	5.1196	4.98035	4.91249
ENSMUSG00000032409.16	Atr	6.00392	6.04433	5.97403	5.77617	5.86748	5.82025	6.2824	6.16785	6.27149	5.5032	5.5344	5.40324
ENSMUSG00000042719.18	Naa25	6.58042	6.66185	6.62851	6.17144	6.25456	6.26338	6.83201	6.81308	6.77198	6.16176	6.19099	6.03796
ENSMUSG00000060802.9	B2m	8.53016	8.46642	8.59587	8.75979	8.74841	8.73444	9.02643	9.01498	8.99367	8.92019	8.89799	9.00273
ENSMUSG00000038213.8	Tapbpl	4.49838	4.47698	4.44505	3.90639	3.87747	3.86385	5.16219	5.16701	5.09377	3.84401	3.79756	3.5972
ENSMUSG00000000743.10	Chmp1a	6.99403	6.97506	6.9975	6.81177	6.7738	6.80341	6.89993	6.88013	6.83805	6.64991	6.57638	6.58261
ENSMUSG00000028413.14	B4galt1	7.06427	7.0537	6.98509	6.59445	6.56796	6.63863	7.17402	7.19923	7.24278	6.65834	6.6144	6.60646
ENSMUSG00000040520.8	Manea	5.18164	5.31447	5.24734	5.08265	5.17535	4.99759	4.99715	4.95151	5.03539	4.63218	4.62001	4.60791
ENSMUSG00000079297.5	Gm2223	5.65513	5.74236	5.67711	5.15296	5.23788	5.3177	5.44457	5.40915	5.41965	5.15202	5.14918	5.05624
ENSMUSG00000024981.7	Acsl5	6.41198	6.46588	6.44997	6.62623	6.68202	6.6192	6.71499	6.6936	6.69305	6.79411	6.85153	6.86609
ENSMUSG00000103286.2	Gm5850	3.2512	3.06754	3.24434	2.20784	1.82638	1.84542	2.55478	2.52454	2.44231	1.6702	1.86474	1.94634
ENSMUSG00000082399.2	Gm14036	4.2344	4.36724	4.33196	3.32332	3.24513	3.38955	4.08758	4.04917	4.02592	3.49194	3.40378	3.5972
ENSMUSG00000016181.10	Utp25	5.033	4.94982	4.94806	4.55306	4.5662	4.59163	5.41541	5.38417	5.38574	4.46766	4.38662	4.37365
ENSMUSG00000099083.8	Atf7	7.16417	7.23085	7.20827	6.89284	6.94593	6.96698	6.90725	6.90181	6.90249	6.77098	6.76723	6.59398
ENSMUSG00000023087.16	Noct	5.66739	5.65465	5.55879	6.13942	6.18208	6.0826	6.1073	6.24542	6.1452	6.11599	6.17037	6.13626
ENSMUSG00000037519.18	Ppfia1	6.93789	6.95599	6.92345	6.55774	6.59478	6.61117	7.12669	7.24774	7.15276	6.53432	6.47086	6.37923
ENSMUSG00000025066.11	Sfr1	7.12587	7.27788	7.1145	7.31015	7.3863	7.42402	7.02664	7.00283	6.96736	7.65312	7.64522	7.65787
ENSMUSG00000023330.13	Dtwd1	3.22	3.16494	3.17957	4.01379	4.13249	4.04773	4.16133	4.15634	4.35015	4.10583	3.97249	3.98886
ENSMUSG00000031149.8	Praf2	5.65643	5.67782	5.63068	5.96219	5.91211	5.89462	5.90163	5.80341	5.94915	6.1786	6.15302	6.33922
ENSMUSG00000090247.8	Bloc1s1	4.78795	4.72186	4.87028	5.24821	5.2185	5.17177	4.42629	4.40014	4.4457	5.32835	5.37308	5.41747
ENSMUSG00000025995.17	Wdr75	6.28334	6.23904	6.30129	5.90842	5.95457	5.97277	6.48595	6.45121	6.48591	5.85954	5.79357	5.88693
ENSMUSG00000053070.6	Cfap300	3.54491	3.53914	3.54423	2.58484	2.49844	2.44665	3.34366	3.1028	3.21837	2.28695	2.3001	2.60663
ENSMUSG00000033161.11	Atp1a1	8.921	8.92736	8.92153	8.78714	8.77495	8.77444	8.7489	8.73661	8.74487	8.62709	8.63357	8.60506
ENSMUSG00000059159.7	Gm8129	4.95515	4.9262	4.99141	4.13203	3.93967	3.80045	4.41947	4.52475	4.54058	4.08025	4.14003	4.22442
ENSMUSG00000105408.2	Gm7285	2.1979	2.00458	2.15069	0.807471	0.581271	0.47757	1.51412	1.60335	1.69354	0.680389	0.583048	0.523448
ENSMUSG00000031634.14	Ufsp2	5.49784	5.551	5.546	5.85118	5.92242	5.8387	5.6846	5.67311	5.63029	5.95214	5.99662	5.98889
ENSMUSG00000002105.16	Slc39a13	6.03164	6.00588	6.02827	6.24536	6.22954	6.12037	5.8544	5.85432	5.95655	6.45858	6.50253	6.54453
ENSMUSG00000018820.14	Zfyve27	5.80339	5.79656	5.69307	5.44503	5.43608	5.37288	5.55378	5.51587	5.52219	5.23999	5.29966	5.2557
ENSMUSG00000061669.7	Rpl34-ps2	2.67263	2.6245	2.71944	1.4267	1.59689	1.4676	2.34637	2.22647	2.14387	1.23815	1.39108	1.50355
ENSMUSG00000041697.9	Cox6a1	6.99531	6.85666	6.96829	7.1644	7.14513	7.07766	7.22259	7.21722	7.25022	7.36131	7.36145	7.43558
ENSMUSG00000030279.16	C2cd5	3.24087	3.45085	3.20034	4.2385	4.18906	4.14316	3.63712	3.60376	3.61952	4.21953	4.14578	4.07001
ENSMUSG00000002249.22	Tead3	5.27566	5.21238	5.21369	5.46919	5.52103	5.52868	4.78872	4.8221	4.8782	5.70169	5.74098	5.76982
ENSMUSG00000038521.18	C1s1	6.93789	6.91358	6.88521	7.41666	7.51174	7.40541	7.55054	7.51174	7.55168	7.29105	7.29907	7.3092
ENSMUSG00000018401.18	Mtmr4	5.0945	5.3273	5.12323	5.76645	5.7143	5.65084	4.98981	5.05451	4.79707	6.06366	6.05575	5.97293
ENSMUSG00000003746.17	Man1a	4.39974	4.29223	4.45517	4.80072	4.68292	4.84983	4.83453	4.73367	4.6601	5.04444	5.08713	5.15173
ENSMUSG00000037773.15	Pced1a	4.67107	4.47427	4.56334	5.00709	5.02248	5.02916	5.00446	4.96655	5.0298	5.20031	5.12541	5.23595
ENSMUSG00000075703.17	Selenoi	6.62046	6.61276	6.58146	6.20492	6.2994	6.23272	6.34308	6.4102	6.40968	6.14985	6.15906	5.98753
ENSMUSG00000029147.12	Ppm1g	6.63071	6.69455	6.64407	6.76349	6.83349	6.8094	6.86699	6.81334	6.91443	7.08447	7.08177	7.03181
ENSMUSG00000109059.2	Gm9354	2.46952	2.45878	2.66071	1.14406	0.849531	1.28836	1.82589	1.68744	2.02889	0.810525	1.06731	0.953583
ENSMUSG00000106734.4	Gm20559	3.65527	3.68232	3.60001	2.97067	2.84388	3.10464	4.49532	4.44646	4.45687	2.78954	2.73655	2.56341
ENSMUSG00000081210.2	Gm12933	4.00962	3.9996	4.02749	3.08142	2.87957	3.02813	3.56484	3.73909	3.60705	2.95191	3.04377	3.19321
ENSMUSG00000081400.2	Gm13680	5.34799	5.29232	5.28833	4.45483	4.46644	4.44283	4.69024	4.67879	4.61347	4.71484	4.6924	4.81861
ENSMUSG00000019951.11	Uhrf1bp1l	7.29778	7.28949	7.27974	6.78266	6.80893	6.73312	7.14001	7.08048	7.02498	6.86551	6.87332	6.7294
ENSMUSG00000022018.8	Rgcc	1.29915	0.942223	1.30439	3.61083	3.37335	3.15129	2.0752	1.73213	1.94416	2.66889	2.85342	2.96502
ENSMUSG00000002307.17	Daxx	5.31638	5.27761	5.35082	5.60843	5.60819	5.54124	5.93689	5.91275	5.92222	5.83213	5.86012	5.72477
ENSMUSG00000014402.16	Tsg101	6.45169	6.47981	6.4983	6.10205	6.1543	6.14733	6.13876	6.19603	6.27819	5.95957	5.97824	6.07262
ENSMUSG00000059689.16	Zfp637	4.75931	4.78232	4.79262	5.22782	5.0603	5.05918	5.20404	5.13824	5.2647	5.38225	5.38101	5.51206
ENSMUSG00000022843.18	Clcn2	3.23742	3.34793	3.54694	3.83007	3.66482	3.70984	2.95614	2.94851	3.07359	4.33698	4.26266	4.32272
ENSMUSG00000020474.12	Polm	3.21649	3.35089	3.5974	3.82634	3.79949	3.72093	3.08232	2.94472	3.02566	4.29188	4.42961	4.38058
ENSMUSG00000028647.14	Mycbp	0.458982	0.324569	0.89275	2.36033	2.2429	2.24015	1.7145	1.61294	1.69354	2.14065	2.15395	2.11546
ENSMUSG00000024776.19	Stambpl1	5.85394	5.81061	5.80522	5.27587	5.36797	5.36654	6.18691	6.19004	6.11909	5.23613	5.32202	5.38129
ENSMUSG00000038005.16	Hpf1	4.6255	4.66948	4.74158	5.19342	5.28389	5.34591	4.92199	5.01527	4.97455	5.24767	5.32582	5.26622
ENSMUSG00000000787.13	Ddx3x	8.8973	8.92903	8.88023	8.61528	8.63367	8.61802	8.74747	8.73441	8.679	8.5549	8.54979	8.43033
ENSMUSG00000029513.15	Prkab1	4.87509	4.80408	4.83861	5.23699	5.16526	5.21477	5.27673	5.2369	5.24954	5.37701	5.31248	5.37158
ENSMUSG00000047965.10	Rpl9-ps7	6.03861	6.11568	6.06742	5.19051	4.99589	5.11321	5.47512	5.51011	5.56473	5.40131	5.35894	5.56353
ENSMUSG00000047261.10	Gap43	1.03808	0.547365	0.526764	2.89776	3.0301	2.86175	1.59377	2.03288	2.00627	2.72865	2.31547	2.76337
ENSMUSG00000024091.10	Vapa	7.19123	7.22824	7.2483	6.94244	6.95558	6.87217	7.30126	7.36038	7.33925	6.84794	6.85985	6.8194
ENSMUSG00000110218.2	Tincr	2.70804	2.67261	2.68547	1.4942	1.36473	1.32371	1.14258	1.19453	1.0648	1.09791	1.47556	1.41988
ENSMUSG00000059552.14	Trp53	9.16728	9.10173	9.13125	8.79839	8.81658	8.90105	8.98733	9.00255	9.00987	8.71443	8.76451	8.79516
ENSMUSG00000021474.10	Sfxn1	6.21378	6.1577	6.2078	5.91942	5.83285	5.9616	6.36417	6.38068	6.35554	5.69141	5.79175	5.70059
ENSMUSG00000028849.18	Map7d1	7.54629	7.5753	7.54813	7.84584	7.80102	7.79373	7.41029	7.4703	7.43321	7.91273	7.88932	7.88267
ENSMUSG00000033420.13	Antxr1	6.14716	6.27064	6.14491	6.75073	6.78655	6.71077	6.32496	6.35912	6.35963	6.68238	6.67769	6.58561
ENSMUSG00000051786.16	Tubgcp6	5.92498	5.86183	5.86009	6.35123	6.31088	6.30709	6.00038	6.10552	6.05487	6.39776	6.39787	6.27183
ENSMUSG00000042870.16	Tom1	4.8583	4.78997	4.91912	4.29231	4.20181	4.23575	5.12832	5.04745	5.15503	4.14199	4.28364	4.22133
ENSMUSG00000083022.2	Rps15a-ps6	3.53931	3.61743	3.43457	2.26968	2.12294	2.28269	2.89063	2.6877	2.92877	2.36905	2.54132	2.39833
ENSMUSG00000018287.13	Spag7	4.87286	4.88391	4.90548	5.37129	5.28389	5.30301	4.56614	4.71598	4.79926	5.4724	5.49502	5.53399
ENSMUSG00000090958.3	Lrrc32	8.78343	8.74945	8.76711	8.63884	8.594	8.64891	8.9917	8.99924	9.01235	8.47278	8.44427	8.41386
ENSMUSG00000082901.2	Rps8-ps5	5.16444	5.16608	5.16697	4.16791	4.15013	4.18059	4.59667	4.571	4.69233	4.41293	4.48047	4.64062
ENSMUSG00000064337.1	mt-Rnr1	7.02845	7.0847	7.10742	7.22349	7.26114	7.22846	6.72027	6.57013	6.67852	7.51146	7.57529	7.69964
ENSMUSG00000038527.10	C1rl	3.97682	3.91612	3.76941	4.45603	4.32731	4.34587	4.24697	4.1547	4.19213	4.60951	4.55678	4.69836
ENSMUSG00000028999.16	Rint1	4.99767	4.93016	4.94704	5.2143	5.3116	5.25347	5.29844	5.21895	5.19474	5.50694	5.57963	5.45605
ENSMUSG00000087543.2	Gm16576	4.13756	4.13626	4.11213	3.32332	3.27223	3.37558	2.83845	2.98589	2.97609	3.31806	3.23901	2.99785
ENSMUSG00000081170.2	Gm12922	3.30504	3.32101	3.44621	2.32369	2.2967	2.47312	3.026	3.07532	2.97996	2.32617	2.38991	2.37631
ENSMUSG00000033222.17	Ttf2	5.45457	5.55293	5.36545	5.82848	5.81037	5.80366	5.24702	5.2299	5.29922	6.0542	6.03386	5.92014
ENSMUSG00000068674.4	Gm10247	3.36331	3.17833	3.3127	2.03729	1.97238	2.11123	2.78854	2.79269	2.84627	2.21566	2.15963	2.34262
ENSMUSG00000006024.14	Napa	7.40048	7.33299	7.41268	7.08414	7.09211	7.12268	7.6287	7.61213	7.66702	6.93494	6.97154	7.04845
ENSMUSG00000014329.15	Bicc1	2.00804	1.87897	2.03213	3.44284	3.62961	3.36996	2.2877	2.6416	2.50819	3.07787	3.28395	3.24579
ENSMUSG00000020886.18	Dlg4	5.64929	5.70757	5.58863	5.8092	5.7648	5.77893	5.16546	5.13658	5.21625	6.15769	6.15551	6.06187
ENSMUSG00000022663.4	Atg3	5.81097	5.79385	5.81983	5.54049	5.62301	5.53999	6.06075	6.06898	6.02706	5.37116	5.32834	5.40393
ENSMUSG00000107951.2	Gm6210	5.9767	6.15981	6.15691	5.24401	5.24542	5.24734	5.55875	5.32267	5.48109	5.36999	5.46319	5.47561
ENSMUSG00000025232.9	Hexa	7.86249	7.84045	7.85622	7.36945	7.34732	7.30249	8.05551	8.02747	8.00386	7.53008	7.5306	7.49986
ENSMUSG00000054091.10	1810037I17Rik	5.38518	5.21969	5.35468	5.48468	5.48267	5.48511	5.0581	5.03591	5.05389	5.84653	5.81219	5.96372
ENSMUSG00000035585.17	Tsen34	6.08407	6.06836	6.13506	6.39161	6.25422	6.35486	6.01447	5.94633	5.93425	6.55071	6.52059	6.55682
ENSMUSG00000027087.12	Itgav	7.33364	7.46453	7.34764	7.92942	8.01314	7.88899	7.61519	7.68554	7.64294	7.86568	7.89412	7.78441
ENSMUSG00000023912.11	Slc25a27	4.37949	4.36284	4.37065	3.8651	4.05499	3.93415	4.01168	4.04563	3.95092	3.60388	3.69948	3.47556
ENSMUSG00000041836.11	Ptpre	3.42844	3.53914	3.43457	3.96704	4.06278	4.0442	3.7171	3.7907	3.87805	4.33217	4.17975	4.2058
ENSMUSG00000027905.16	Ddx20	4.76772	4.7856	4.77658	5.0186	5.09488	5.06093	4.97036	4.89956	5.05389	5.4116	5.29257	5.33493
ENSMUSG00000064068.16	Mtx1	4.88727	4.89206	4.85943	5.22285	5.16743	5.21555	5.31763	5.26378	5.33672	5.37992	5.34902	5.45999
ENSMUSG00000032126.17	Hmbs	4.32678	4.2131	4.36759	4.95414	4.72179	4.68858	4.5612	4.47172	4.62836	5.06342	5.0355	5.17505
ENSMUSG00000020902.13	Ntn1	3.34736	3.25618	3.46635	4.86315	4.78433	4.71323	3.9468	4.01883	3.89251	4.21432	4.20746	4.04753
ENSMUSG00000034863.10	Ano8	5.08298	5.01191	5.12956	5.7249	5.6335	5.67955	4.8376	4.64063	4.80473	5.68623	5.6317	5.6698
ENSMUSG00000020605.10	Hs1bp3	5.65319	5.64443	5.67278	5.41983	5.47452	5.51727	6.04711	5.96564	6.03313	5.22126	5.20179	5.16464
ENSMUSG00000031065.15	Cdk16	8.06076	8.0749	8.07536	7.90461	7.90254	7.92144	7.84415	7.8345	7.89804	7.74257	7.76731	7.74748
ENSMUSG00000081382.2	Rpl18-ps1	4.12264	3.93991	4.04099	2.89776	2.79237	2.52972	3.4704	3.47559	3.38835	2.89436	2.91858	3.12879
ENSMUSG00000082475.3	Gm7206	5.49423	5.49256	5.50346	4.48358	4.3893	4.4575	4.92585	4.98882	4.97261	4.82246	4.81275	5.01763
ENSMUSG00000005774.13	Rfx5	5.36789	5.32655	5.25563	5.88795	5.79128	5.71935	4.9778	4.91224	4.85201	5.88192	5.88092	5.83941
ENSMUSG00000024379.5	Tslp	0.86962	1.11931	0.526764	3.33125	3.30935	3.16435	1.86655	2.06817	2.11597	2.35015	2.3001	2.58278
ENSMUSG00000087408.11	Cers1	4.50989	4.5599	4.52817	4.04949	3.92095	3.99206	3.88877	3.79702	4.10788	3.69657	3.78841	3.67144
ENSMUSG00000005683.9	Cs	8.76771	8.76687	8.77182	8.48142	8.5071	8.48115	8.37021	8.37261	8.37722	8.35752	8.35192	8.48619
ENSMUSG00000020454.18	Eif4enif1	6.06078	6.08712	6.06978	6.37572	6.41033	6.46053	6.30919	6.34876	6.24919	6.47394	6.46771	6.4753
ENSMUSG00000043964.15	Orai3	4.06529	4.04782	4.04099	3.49085	3.60423	3.43336	3.78866	3.68101	3.65872	2.98903	3.25503	3.21819
ENSMUSG00000062908.13	Acadm	5.27735	5.21645	5.28914	5.82333	5.84328	5.79948	4.99898	5.03324	4.8414	5.86911	5.74476	5.8683
ENSMUSG00000033285.16	Wdr3	6.30909	6.37211	6.38682	6.09663	6.11628	6.12788	6.56001	6.51333	6.58431	5.98238	5.9641	5.91107
ENSMUSG00000022562.16	Oplah	4.11135	3.9996	4.15709	2.85805	2.83663	2.70526	3.62295	3.68329	3.77031	3.27111	3.27088	3.11887
ENSMUSG00000036737.13	Oxsr1	6.06372	6.1135	6.02827	5.75273	5.87811	5.8099	6.2505	6.27441	6.27189	5.58378	5.63833	5.47432
ENSMUSG00000059912.5	Rpl21-ps6	2.51592	2.64394	2.59426	1.34548	1.27107	1.52946	1.99679	1.77547	1.85415	1.12039	1.1835	1.41988
ENSMUSG00000028394.10	Pole3	5.14612	5.15596	5.21113	5.67123	5.65477	5.77521	5.47249	5.46648	5.56215	5.63592	5.70011	5.73346
ENSMUSG00000031600.12	Vps37a	7.13728	7.12827	7.09915	6.91785	6.98312	6.92563	6.90335	6.89002	6.88323	6.75175	6.79146	6.68752
ENSMUSG00000006463.14	Zdhhc24	3.5917	3.71485	3.66371	3.18134	2.8654	3.0494	3.16613	3.23288	3.01059	2.52464	2.55	2.71152
ENSMUSG00000039047.18	Pigk	6.64612	6.72881	6.72573	6.58038	6.48319	6.59167	7.01967	6.98632	6.95412	6.23602	6.31241	6.26959
ENSMUSG00000032253.14	Phip	6.26986	6.45044	6.31604	6.89774	6.9562	6.98203	6.08981	6.16825	6.10718	7.08893	7.11452	6.9005
ENSMUSG00000117822.2	Eef1a1-ps1	8.06381	8.04323	7.96919	6.83287	6.96288	7.02562	7.3346	7.22701	7.28685	7.02502	6.78825	7.02718
ENSMUSG00000022003.8	Slc25a30	7.05963	7.02526	6.998	6.6665	6.67366	6.61296	6.48137	6.45554	6.45667	6.57507	6.66275	6.67714
ENSMUSG00000078584.10	AU022252	4.81488	4.83612	4.76849	4.35461	4.29066	4.29038	4.46916	4.3932	4.4513	4.26312	4.18394	4.05449
ENSMUSG00000020260.10	Pofut2	7.26907	7.23506	7.2722	7.6494	7.61938	7.56623	7.37109	7.40987	7.35743	7.60012	7.59326	7.61824
ENSMUSG00000035958.4	Tdp2	4.8379	4.90923	4.84632	5.22001	5.26242	5.18624	4.94685	5.06764	5.03073	5.37584	5.41884	5.37506
ENSMUSG00000066232.5	Ipo7	8.32667	8.43982	8.3737	8.00027	8.07102	8.0767	8.09443	8.08006	8.10545	8.01939	8.02681	7.94632
ENSMUSG00000075511.10	1700001L05Rik	2.23305	2.40283	2.50247	1.39677	1.68829	1.66426	1.37451	1.07473	1.3306	0.665177	0.344316	0.983036
ENSMUSG00000020358.18	Hnrnpab	8.77861	8.75071	8.85405	9.05063	9.09237	9.072	9.19179	9.19141	9.17445	9.13792	9.10775	9.16702
ENSMUSG00000029769.17	Ccdc136	5.61239	5.61703	5.53309	5.0677	4.95549	4.99576	4.87594	4.81693	4.65526	4.93534	4.98035	4.76133
ENSMUSG00000084235.3	Gm15421	3.01314	3.06754	3.25761	2.17295	2.32287	2.32981	2.71029	2.71467	2.6117	1.80121	2.08988	1.97594
ENSMUSG00000031751.15	Amfr	8.20016	8.11974	8.20594	8.01183	7.98556	8.00649	8.36853	8.38263	8.38665	7.85368	7.85742	7.834
ENSMUSG00000025823.10	Pdia4	6.79231	6.80012	6.77069	7.33634	7.31672	7.38638	7.00222	7.06266	7.03851	7.13244	7.14601	7.23272
ENSMUSG00000039483.11	Asb6	5.26636	5.29846	5.23984	5.55975	5.44802	5.59166	5.63663	5.71657	5.73373	5.77969	5.75888	5.74854
ENSMUSG00000049577.16	Zfpm1	4.25507	4.3377	4.248	4.88307	4.80768	4.80676	4.50179	4.52475	4.59843	4.8293	4.83513	4.89903
ENSMUSG00000028843.9	Sh3bgrl3	5.14796	5.05157	5.13046	5.46739	5.47394	5.43211	5.34378	5.4625	5.53475	5.78189	5.61731	5.84844
ENSMUSG00000094989.2	Rpl9-ps4	5.92229	5.85455	5.90927	5.01614	4.93358	4.9342	5.30363	5.28867	5.13779	5.23678	5.15275	5.38681
ENSMUSG00000056313.6	Tcim	4.88727	4.99309	4.89278	5.43525	5.39104	5.48381	5.5274	5.41327	5.37401	5.45315	5.47407	5.51143
ENSMUSG00000060126.15	Tpt1	10.4803	10.4655	10.4697	9.90318	9.8717	9.89115	10.013	9.98674	10.0054	10.0817	10.0125	10.1762
ENSMUSG00000056758.15	Hmga2	6.9907	6.96544	7.00834	7.66635	7.76163	7.84621	7.53281	7.59075	7.61658	7.38515	7.48363	7.4808
ENSMUSG00000049804.10	Armcx4	3.42541	3.59013	3.47206	4.71642	4.71291	4.60605	3.04384	3.07878	3.02191	5.02967	5.03628	4.56473
ENSMUSG00000027067.17	Ssrp1	7.88435	7.91934	7.85459	8.05558	8.05081	8.07788	8.22758	8.2381	8.20719	8.2152	8.21775	8.17597
ENSMUSG00000105359.2	Rpl21-ps10	3.41626	3.55719	3.56574	2.28065	2.2967	2.60826	2.94479	2.91402	2.89222	2.30179	2.04143	2.47807
ENSMUSG00000060601.14	Nr1h2	6.38957	6.3183	6.35515	5.8951	5.87413	5.89706	6.1614	6.14943	6.19855	5.8163	5.92957	5.97751
ENSMUSG00000029234.14	Tmem165	6.55322	6.48991	6.53691	6.77274	6.76524	6.77788	6.4027	6.44317	6.3898	6.85947	6.8785	6.92489
ENSMUSG00000096916.8	Zfp850	2.46361	2.40283	2.66071	3.3754	3.37084	3.55237	2.77151	3.03665	2.7988	3.54069	3.53861	3.61847
ENSMUSG00000019795.18	Pcmt1	6.61681	6.61799	6.651	6.83287	6.81032	6.83896	6.47284	6.52925	6.47874	6.96047	6.96405	7.00335
ENSMUSG00000034430.17	Zxdc	5.87801	5.84618	5.85136	5.20137	5.23857	5.18063	5.50569	5.42964	5.4708	5.3144	5.43885	5.40664
ENSMUSG00000008683.17	Rps15a	8.6102	8.43512	8.58563	7.40481	7.32742	7.3722	8.05913	7.94113	7.92139	7.45329	7.40862	7.63704
ENSMUSG00000000194.14	Gpr107	6.61581	6.58537	6.5923	6.38369	6.43122	6.46647	6.85214	6.84216	6.84523	6.22375	6.23104	6.10479
ENSMUSG00000010051.16	Hyal1	4.00759	4.04964	3.87437	3.11856	3.16928	3.10464	3.26372	3.06138	3.20519	3.11753	3.0621	2.80106
ENSMUSG00000066551.13	Hmgb1	5.76368	5.60902	5.69307	6.43704	6.27514	6.31552	6.01718	5.81488	5.99103	6.33156	6.40985	6.46032
ENSMUSG00000031242.8	2610002M06Rik	5.34075	5.43653	5.39653	5.01204	5.13899	5.05305	5.24316	5.2454	5.16101	4.87629	4.85454	4.84992
ENSMUSG00000031740.9	Mmp2	8.46318	8.45778	8.46163	8.87133	8.88062	8.75535	8.89184	8.82751	8.87248	8.84007	8.80123	8.83936
ENSMUSG00000062929.9	Cfl2	6.83783	6.92554	6.8699	6.48346	6.49561	6.44823	6.72829	6.67226	6.68298	6.42059	6.48253	6.5312
ENSMUSG00000081620.2	Gm14633	5.03101	4.79215	5.0383	3.90993	3.78451	3.72093	4.25158	4.32336	4.11671	3.9068	3.82286	4.12884
ENSMUSG00000089993.2	Gm5822	4.15599	3.95943	3.95194	2.84334	2.98165	3.01738	3.27283	3.25142	3.35592	2.95504	2.65839	3.12219
ENSMUSG00000106926.2	Rpl7-ps7	4.58391	4.61634	4.71055	3.76324	3.51172	3.64378	4.31905	4.37218	4.27645	3.90841	3.71694	3.92579
ENSMUSG00000112605.2	Gm7476	4.3951	4.36431	4.3813	3.49321	3.46314	3.44945	3.70594	3.70138	3.77031	3.46804	3.45091	3.75278
ENSMUSG00000031904.6	Slc7a6	6.44496	6.52539	6.40781	6.75024	6.70583	6.67301	6.63135	6.65525	6.74691	6.86489	6.9438	6.89034
ENSMUSG00000031880.8	Rrad	4.3982	4.50116	4.50192	4.67961	4.80118	4.65544	5.11657	5.16375	5.10977	5.04076	5.02074	5.14686
ENSMUSG00000025290.18	Rps24	10.2013	10.3114	10.2786	8.85112	8.8567	8.92253	9.65404	9.68181	9.71911	8.96567	8.98798	9.25689
ENSMUSG00000040648.16	Ppip5k2	5.90714	5.98078	5.83485	5.65973	5.75427	5.74076	6.13502	6.15272	6.14908	5.41615	5.41528	5.22906
ENSMUSG00000017188.4	Coa3	4.03374	3.81042	3.90632	4.45845	4.41019	4.50446	4.2346	4.14151	4.08827	4.61645	4.58029	4.75921
ENSMUSG00000050379.16	Septin6	3.95593	4.25479	3.98623	4.54739	4.52959	4.41169	3.47304	3.48084	3.51658	4.82844	4.79186	4.87665
ENSMUSG00000020840.11	Blmh	5.28155	5.36586	5.41959	4.69301	4.75099	4.73855	5.09621	5.20079	5.18973	4.71576	4.71285	4.86384
ENSMUSG00000097028.3	Ptgs2os	1.72166	1.75931	1.52898	2.93641	2.62581	2.84157	0.989023	1.08854	1.39004	3.33017	3.14182	2.87755
ENSMUSG00000027533.11	Fabp5	4.24305	4.1068	4.11213	4.78829	4.65538	4.45218	5.01263	5.25538	5.26152	5.19701	5.21141	5.35408
ENSMUSG00000032548.15	Slco2a1	3.83073	3.68935	3.60521	3.12161	3.0739	3.14142	4.16785	4.08061	4.16855	2.81388	2.95173	2.75485
ENSMUSG00000069986.5	Gm8054	2.39077	2.40852	2.40445	1.132	1.22741	1.02759	1.66003	1.64133	1.75814	1.05187	1.1835	1.27262
ENSMUSG00000020393.17	Kremen1	5.48769	5.47638	5.43062	5.87715	5.87192	5.85036	5.22295	5.32705	5.31158	5.92606	5.96653	5.85791
ENSMUSG00000116864.2	Gm3320	0.719085	0.145225	0.840785	2.39607	2.34857	2.21527	1.06085	1.65067	1.20381	2.51619	2.46989	2.89702
ENSMUSG00000040856.18	Dlk1	1.49719	1.28942	1.47318	3.17254	3.1635	2.67365	1.78406	2.05416	1.99099	2.83443	2.95827	2.82971
ENSMUSG00000028653.17	Trit1	4.19037	4.39188	4.14642	3.65574	3.59996	3.7815	4.57843	4.51456	4.43304	3.4504	3.29949	3.46776
ENSMUSG00000039361.12	Picalm	8.75015	8.81797	8.80976	8.51728	8.57603	8.54697	8.60239	8.58117	8.61426	8.44452	8.49806	8.46971
ENSMUSG00000070692.7	Rps12-ps10	3.98302	3.85071	4.06195	2.77519	2.61314	2.72743	3.16613	2.98958	2.96049	3.01626	2.88808	3.11222
ENSMUSG00000036023.7	Parp2	5.35916	5.45247	5.3769	5.68057	5.68585	5.67214	5.19129	5.12741	5.22035	5.80116	5.92874	5.90963
ENSMUSG00000018340.14	Anxa6	7.35633	7.36171	7.40952	7.80631	7.73143	7.65838	7.19393	7.12787	7.20293	7.75789	7.7623	7.80479
ENSMUSG00000018574.15	Acadvl	6.13885	6.06069	6.13551	6.48435	6.43603	6.42503	5.70211	5.72433	5.66981	6.47012	6.50448	6.54576
ENSMUSG00000027712.14	Anxa5	8.64104	8.65284	8.65811	8.99881	8.99748	9.04467	8.51989	8.46948	8.50237	8.94648	8.9398	8.99773
ENSMUSG00000021395.12	Spin1	5.96525	5.9884	5.89076	6.43827	6.37856	6.409	6.31581	6.36445	6.31355	6.43832	6.3638	6.31879
ENSMUSG00000027074.15	Slc43a3	3.97474	3.87353	3.8851	4.17674	4.09198	4.14974	4.83145	4.83854	4.93119	4.49265	4.485	4.53646
ENSMUSG00000046862.15	Pramel12	3.72606	3.73085	3.80148	4.21583	4.16467	4.2874	4.19524	4.02063	4.19045	4.43103	4.40588	4.44152
ENSMUSG00000087142.8	Gm12454	2.9299	2.77754	2.82128	2.17295	2.1407	1.93957	0.696051	0.849886	1.1498	1.52608	1.62277	1.53372
ENSMUSG00000091695.3	Gm17669	4.1633	4.30144	4.23967	3.2103	3.11939	3.1348	3.77805	3.83029	3.93105	3.17772	3.3123	3.52144
ENSMUSG00000024454.17	Hdac3	6.21992	6.1615	6.23699	6.60757	6.59397	6.63012	6.49408	6.54373	6.5129	6.53379	6.60245	6.60409
ENSMUSG00000018669.15	Cdk5rap3	5.60033	5.56954	5.56814	5.85164	5.8333	5.78052	5.69818	5.6981	5.73316	5.96695	5.95962	6.00558
ENSMUSG00000027076.11	Timm10	4.11135	4.05147	4.08633	3.62811	3.59137	3.53236	4.49402	4.56236	4.5141	3.42804	3.27088	3.44942
ENSMUSG00000101878.2	Gm8203	5.17623	5.01565	5.16345	5.55354	5.55785	5.59226	5.56865	5.67196	5.56924	5.65289	5.6142	5.75869
ENSMUSG00000066721.4	Zfp575	1.43817	1.44157	1.23898	2.80588	2.92469	2.57442	0.482483	0.583418	0.316703	2.80002	2.6259	3.10219
ENSMUSG00000069729.15	Arid1b	6.52301	6.54685	6.52427	6.23413	6.32551	6.20889	6.35134	6.41329	6.34731	6.07413	6.04274	5.84242
ENSMUSG00000022528.9	Hes1	3.60786	3.38306	3.63602	4.50244	4.53408	4.46279	3.32336	3.30269	3.2572	4.314	4.22112	4.33562
ENSMUSG00000048280.19	Zfp738	5.00379	5.09459	5.09208	4.81021	4.86044	4.85286	4.77277	4.67422	4.62712	4.49803	4.45873	4.26694
ENSMUSG00000002910.12	Arrdc2	3.15917	3.29358	3.40207	3.58674	3.57405	3.62737	2.90241	2.80947	2.71295	4.10018	4.08134	4.16943
ENSMUSG00000055447.20	Cd47	7.04536	7.03863	6.99899	6.61517	6.73218	6.72351	7.17907	7.2274	7.24801	6.6593	6.63087	6.63804
ENSMUSG00000019978.17	Epb41l2	8.89942	8.97526	8.90555	9.37232	9.41792	9.37498	9.16117	9.10857	9.0729	9.33245	9.31716	9.23344
ENSMUSG00000062284.6	Gm6030	4.1357	3.81471	3.8461	2.75567	2.68349	2.55472	3.69018	3.63469	3.42007	2.72131	2.81431	2.97604
ENSMUSG00000015750.16	Aph1a	6.1407	6.2108	6.11332	5.84011	5.84011	5.8336	5.87447	5.9468	5.91516	5.78849	5.71852	5.70612
ENSMUSG00000006717.8	Acot13	5.3221	5.26668	5.33134	4.75428	4.7139	4.76986	4.72714	4.6418	4.66852	4.66982	4.68256	4.84792
ENSMUSG00000037035.6	Inhbb	4.62153	4.59902	4.56867	4.795	4.87642	4.81713	4.72382	4.96186	4.835	5.2258	5.20042	5.16946
ENSMUSG00000069094.13	Pde7a	5.96525	5.98221	5.97754	6.22564	6.2498	6.31369	5.81444	5.77806	5.73717	6.42821	6.42232	6.32311
ENSMUSG00000020650.16	Bcap29	5.18792	5.12603	5.1555	4.56992	4.71093	4.74182	5.56865	5.59905	5.52617	4.41293	4.4816	4.64408
ENSMUSG00000089810.2	Gm16536	3.63702	3.82964	3.66868	3.0593	2.8654	2.99197	2.91797	2.89449	2.91669	2.82076	2.80708	2.87362
ENSMUSG00000056629.17	Fkbp2	4.31862	4.12247	4.26946	4.7012	4.76346	4.60844	3.9411	4.05973	4.07927	4.9218	4.84663	4.9614
ENSMUSG00000052997.16	Uba2	6.78078	6.75614	6.81204	7.05569	7.02177	7.05856	6.95916	6.97475	6.90326	7.1772	7.12255	7.11044
ENSMUSG00000048486.7	Fitm2	4.6582	4.67066	4.51993	3.89929	3.96481	3.96433	4.85387	4.87686	4.77271	4.06149	3.91986	3.95396
ENSMUSG00000025352.7	Gdf11	3.91755	4.01087	3.92724	4.55532	4.564	4.45882	3.60384	3.62524	3.47051	4.56615	4.58558	4.59485
ENSMUSG00000116972.2	Gm6278	5.76548	5.46959	5.74759	4.5688	4.52283	4.42531	5.08074	5.14487	5.16272	4.74499	4.77158	4.94653
ENSMUSG00000029314.15	Gpat3	2.46952	2.44776	2.48565	1.6204	1.6308	1.26431	3.20152	3.25142	3.11294	1.01634	1.161	1.35377
ENSMUSG00000117810.2	Gm8934	3.07256	2.76871	3.05207	1.50359	1.50846	1.31202	2.1692	2.43005	2.16444	1.4571	1.54671	1.8296
ENSMUSG00000031365.14	Zfp275	6.58315	6.601	6.53997	6.88769	6.94024	6.86419	6.3592	6.33651	6.40248	6.95599	6.96729	6.90484
ENSMUSG00000061666.7	Gdpd1	4.98536	5.18279	5.15727	4.25805	4.39671	4.36438	4.97594	4.91127	4.83393	4.45113	4.51415	4.39845
ENSMUSG00000031422.17	Morf4l2	8.02184	8.03474	7.98673	8.26073	8.25383	8.27247	8.1817	8.16348	8.10977	8.35678	8.33286	8.301
ENSMUSG00000082575.2	Eef2-ps2	5.35359	5.27761	5.42181	4.58658	4.38806	4.35159	4.55996	4.63122	4.6781	4.68404	4.69436	4.73777
ENSMUSG00000058355.9	Abce1	8.29531	8.37551	8.34426	8.04858	8.09636	8.13973	8.53431	8.56598	8.54672	8.01714	7.97928	8.01554
ENSMUSG00000026766.17	Mmadhc	6.09127	6.07419	6.04941	6.23835	6.27045	6.25349	6.31471	6.3194	6.35665	6.4237	6.41194	6.41478
ENSMUSG00000033075.18	Senp1	6.29627	6.31717	6.29165	6.8578	6.87983	6.90317	6.09238	6.17798	6.05212	6.74589	6.76955	6.64411
ENSMUSG00000082626.2	Rps13-ps5	3.37909	3.48896	3.43164	2.45049	2.56133	2.53475	2.91797	2.98958	2.83348	2.4243	2.31036	2.60189
ENSMUSG00000041870.18	Ankrd13a	6.29169	6.30272	6.24743	6.65759	6.65111	6.71383	6.45028	6.54279	6.48591	6.68025	6.6242	6.6715
ENSMUSG00000057098.15	Ebf1	1.57596	1.56906	1.36696	2.93294	2.97506	3.15784	2.20134	2.11616	2.37329	2.59857	2.7174	2.79692
ENSMUSG00000001924.16	Uba1	9.12569	9.13833	9.16472	8.9738	8.94263	8.94959	9.02474	9.02669	9.03225	8.87422	8.85725	8.84982
ENSMUSG00000033752.8	Mnd1	1.13045	1.23918	1.21196	2.49824	2.37882	2.31232	1.54451	1.91379	1.7938	2.44226	2.6259	2.97238
ENSMUSG00000046329.15	Slc25a23	3.77935	3.9691	3.9922	3.25269	3.10137	3.04235	2.1692	2.43005	2.43669	2.92661	2.83222	3.00863
ENSMUSG00000075266.6	Cenpw	3.61053	3.47003	3.60521	4.27048	4.33376	4.20765	3.05091	3.30565	3.31969	4.36313	4.38176	4.64983
ENSMUSG00000107881.2	Gm44250	5.63884	5.84513	5.75813	5.53306	5.5573	5.5312	5.42224	5.39324	5.38428	5.25975	5.26382	5.21671
ENSMUSG00000075581.6	Gm16409	4.06138	3.97678	4.02167	2.95021	2.90057	2.77928	3.40014	3.52975	3.53514	3.03117	3.12448	3.29653
ENSMUSG00000017999.17	Ddx27	6.50299	6.46895	6.56187	6.25652	6.31153	6.321	6.64864	6.70205	6.67374	6.16751	6.11402	6.10897
ENSMUSG00000037411.11	Serpine1	7.16712	7.13343	7.06346	7.95681	7.93651	7.72503	7.40857	7.6461	7.62403	8.33148	8.3371	8.34686
ENSMUSG00000083374.2	Gm11449	3.14816	3.1309	3.12268	2.11899	2.07448	1.99178	2.89063	2.78846	2.90043	2.25683	2.13675	2.18681
ENSMUSG00000110317.2	Gm45250	2.58828	2.66787	2.38038	1.78346	1.85536	1.86155	1.7145	1.66917	1.7123	1.09791	1.23826	1.47274
ENSMUSG00000041775.8	Mapk1ip1	3.74567	3.76454	3.79239	3.30195	3.56092	3.55237	2.51952	2.5547	2.53477	2.86137	2.93193	2.92384
ENSMUSG00000060019.7	Gm10073	5.79635	5.59723	5.73519	4.68581	4.61889	4.55367	5.07555	5.22287	5.12735	4.77542	4.75101	5.04669
ENSMUSG00000036459.16	Wtip	5.43055	5.43374	5.58469	5.00792	4.96632	4.9921	5.18327	5.25768	5.22852	4.91619	4.99632	4.9614
ENSMUSG00000025937.7	Lactb2	5.77624	5.76695	5.79558	5.28815	5.27521	5.34949	5.62008	5.47439	5.65049	5.29167	5.25455	5.3119
ENSMUSG00000035778.18	Ggta1	3.21298	3.42299	3.18305	3.69316	3.74635	3.84167	3.75874	3.65803	3.54039	4.20646	4.13138	4.06141
ENSMUSG00000041966.19	Dcaf17	3.48785	3.82964	3.78095	3.18718	3.15478	3.31247	3.13984	3.02233	3.05901	2.79304	2.7174	2.6804
ENSMUSG00000040857.16	Erf	6.50299	6.45869	6.51773	6.64862	6.62716	6.58804	6.23661	6.30506	6.34506	6.85172	6.90413	6.85244
ENSMUSG00000066553.6	Gm6969	4.75931	4.57517	4.72972	3.97382	3.78073	3.80671	4.14985	4.12318	4.10611	3.98239	3.90977	4.05968
ENSMUSG00000082762.2	Gm12366	6.9593	6.90479	7.01934	6.05452	6.0236	5.8744	6.66487	6.76254	6.62602	5.96073	5.87316	6.14769
ENSMUSG00000114738.2	Gm41041	3.93474	3.63454	3.73424	2.93294	2.9618	2.88165	3.34653	3.41384	3.37958	2.91701	2.89832	2.90088
ENSMUSG00000053931.12	Cnn3	8.65439	8.59526	8.66224	9.01064	9.01142	8.97372	8.79984	8.78566	8.78598	8.94697	8.9261	9.02481
ENSMUSG00000101795.3	Gm5835	4.87397	4.55862	4.91912	3.78265	3.58706	3.70761	4.22681	4.32044	4.39582	3.64323	3.7718	3.88932
ENSMUSG00000068039.14	Tcp1	8.91038	8.99254	8.9489	8.51169	8.51917	8.57375	8.72788	8.7316	8.67974	8.59207	8.57899	8.6603
ENSMUSG00000034593.17	Myo5a	7.99688	8.04996	7.99071	7.79009	7.81664	7.8354	7.85303	7.86216	7.83446	7.63311	7.64002	7.44073
ENSMUSG00000047905.11	Gm8566	4.96773	4.85396	5.12051	4.24831	4.27734	4.23421	4.57353	4.41939	4.42596	4.17458	4.18394	4.37365
ENSMUSG00000020181.19	Nav3	2.41546	2.23353	2.3682	3.06248	2.98165	2.97354	2.64167	2.83837	2.64136	3.58582	3.59425	3.20263
ENSMUSG00000044030.5	Irf2bp1	5.28239	5.24855	5.28348	5.49237	5.51424	5.59407	5.57234	5.51906	5.52152	5.67394	5.71611	5.76294
ENSMUSG00000003929.12	Zfp81	4.53545	4.59528	4.48932	4.98128	5.0352	5.12494	4.35092	4.32919	4.32904	5.12239	5.12903	5.02826
ENSMUSG00000059430.15	Actg2	0.17074	0.198781	0.153493	1.74439	1.97238	1.59843	1.79252	1.87447	1.92016	1.78019	1.82236	1.51368
ENSMUSG00000036186.6	Dipk1b	4.33812	4.22283	4.31778	4.60305	4.54634	4.49932	3.70594	3.84664	3.64414	4.87546	4.92634	5.05104
ENSMUSG00000041084.9	Ostc	5.85168	5.77964	5.75346	6.32167	6.25694	6.2489	5.9981	6.05233	5.98044	6.17155	6.19964	6.25193
ENSMUSG00000030802.15	Bckdk	5.06359	5.00253	5.16697	5.65341	5.66196	5.54187	5.50633	5.54559	5.52617	5.58782	5.57592	5.72313
ENSMUSG00000030062.8	Rpn1	7.80423	7.83398	7.85021	8.06532	8.02892	8.04517	7.97332	8.00534	7.97516	8.12183	8.11285	8.12785
ENSMUSG00000078180.5	Gm20900	4.87731	4.72072	4.96939	3.8651	3.87394	3.69417	4.44117	4.44914	4.34565	4.04543	4.07533	4.22442
ENSMUSG00000027195.11	Hsd17b12	6.44496	6.34118	6.42409	6.53359	6.60441	6.55465	6.75803	6.74847	6.70977	6.7549	6.82517	6.77168
ENSMUSG00000041346.12	Wrap53	3.25804	3.14802	3.15496	3.52813	3.46078	3.52479	3.45182	3.60856	3.4511	4.04543	3.87044	4.07172
ENSMUSG00000005803.15	Sqor	5.43659	5.42534	5.5187	5.74681	5.74123	5.7837	5.21353	5.23534	5.25514	5.88315	5.87791	6.02341
ENSMUSG00000026109.15	Tmeff2	1.83582	1.40785	1.65469	2.80967	2.86184	2.70079	2.76293	2.71912	2.64136	2.76834	2.73274	2.92004
ENSMUSG00000101502.2	Rpl7a-ps10	3.5917	3.46731	3.57372	2.69958	2.66725	2.66449	3.09606	2.99692	3.09161	2.78954	2.63	2.64859
ENSMUSG00000037349.10	Nudt22	2.72789	2.79937	2.90379	3.35738	3.32238	3.40338	3.1198	3.13311	3.26992	3.65482	3.61095	3.86381
ENSMUSG00000027223.16	Mapk8ip1	4.22221	4.23249	4.14106	4.64609	4.61042	4.49674	3.69244	3.76512	3.55605	4.79039	4.84575	4.86384
ENSMUSG00000046691.15	Chtf8	7.41777	7.49429	7.31012	7.73036	7.63094	7.6892	7.77603	7.78857	7.68478	7.89338	7.87221	7.82106
ENSMUSG00000087412.5	Gm15501	7.10634	7.08181	7.11131	6.13149	6.1583	6.06008	6.59431	6.53588	6.52389	6.36224	6.34302	6.61177
ENSMUSG00000044308.18	Ubr3	7.20058	7.26695	7.19151	6.80253	6.84007	6.83105	6.87224	6.86717	6.86867	6.86405	6.84868	6.69366
ENSMUSG00000021156.18	Zmynd11	7.28716	7.24265	7.20357	7.04166	6.98742	7.05659	7.07623	7.02634	7.02732	6.89719	6.89755	6.79236
ENSMUSG00000029030.15	Tprgl	6.04158	6.04661	6.07494	5.835	5.84418	5.71548	6.19531	6.24156	6.22532	5.51173	5.53056	5.67826
ENSMUSG00000065979.13	Cpped1	4.2344	4.14822	4.16767	4.65032	4.62416	4.51851	4.75772	4.58446	4.68405	4.74861	4.83513	4.77086
ENSMUSG00000028248.16	Pnisr	7.08317	7.09775	7.04253	6.8011	6.90733	6.8481	6.62218	6.54154	6.5773	6.67884	6.7054	6.55192
ENSMUSG00000080059.5	Rps19-ps3	4.48678	4.25952	4.41279	3.48137	3.43222	3.48631	3.66043	3.61096	3.77478	3.49625	3.69557	3.63015
ENSMUSG00000005198.16	Polr2a	7.94456	8.05677	7.91865	8.10615	8.10478	8.13849	7.39665	7.42321	7.38435	8.42842	8.37547	8.29752
ENSMUSG00000026914.16	Psmd14	6.67516	6.74914	6.73198	6.38845	6.41915	6.4004	6.54475	6.56334	6.5453	6.34654	6.34583	6.41714
ENSMUSG00000030168.14	Adipor2	6.15726	6.15939	6.15736	6.36867	6.35561	6.35912	6.37267	6.34732	6.30044	6.51536	6.53952	6.46587
ENSMUSG00000029622.17	Arpc1b	8.01593	7.99094	8.06573	8.3676	8.30075	8.26747	8.15425	8.17415	8.18366	8.37303	8.33199	8.43865
ENSMUSG00000041264.17	Uspl1	5.29741	5.3348	5.37081	5.60571	5.49135	5.61086	5.62008	5.66622	5.60606	5.79068	5.87143	5.75069
ENSMUSG00000031563.9	Wwc2	7.4614	7.43502	7.41712	7.18625	7.20755	7.14652	7.21454	7.28552	7.20107	7.07101	7.08476	6.92939
ENSMUSG00000020368.16	Canx	8.80957	8.86635	8.79568	8.62989	8.71236	8.68814	8.72782	8.70739	8.65822	8.49674	8.50952	8.42363
ENSMUSG00000021079.17	Timm9	4.77609	4.80839	4.7404	4.44267	4.46409	4.48117	4.84779	4.97401	5.0866	4.17324	4.20609	4.14358
ENSMUSG00000109933.2	Gm7600	5.02199	5.09724	4.73091	4.07176	4.07976	4.00482	4.58088	4.60863	4.58577	4.18662	4.08134	4.25643
ENSMUSG00000033735.10	Spr	4.93608	5.01285	4.93882	5.21072	5.14267	5.13824	5.56494	5.63773	5.56602	5.47785	5.3895	5.54452
ENSMUSG00000030421.10	Uri1	6.77274	6.72368	6.73139	6.43918	6.4539	6.49969	6.6666	6.58634	6.59824	6.34086	6.35143	6.42454
ENSMUSG00000108207.3	1810059H22Rik	3.2235	3.40885	3.1969	2.68728	2.65905	2.66449	2.17568	2.09579	2.33144	2.24665	2.20982	1.7968
ENSMUSG00000004233.15	Wars2	3.8076	3.7778	3.62326	3.1959	3.24513	3.25869	3.43299	3.55733	3.39126	2.96749	2.91186	2.75058
ENSMUSG00000105814.3	Mir703	2.04014	2.27775	2.19965	1.24828	1.30297	1.32371	1.28136	1.1292	1.35467	0.917102	0.992827	0.829366
ENSMUSG00000030727.13	Rabep2	4.33327	4.26894	4.37523	4.93258	4.79465	4.84882	5.04222	4.9768	5.11595	4.8837	4.86241	4.94653
ENSMUSG00000068240.6	Gm11808	7.29882	7.20675	7.33498	6.54642	6.54034	6.47959	6.86348	6.88088	6.85555	6.82844	6.74139	6.9301
ENSMUSG00000036036.16	Zfp57	5.85224	5.81865	5.79103	5.63697	5.59751	5.60847	5.2895	5.27288	5.27814	6.1702	6.19238	6.26922
ENSMUSG00000031974.9	Abcb10	5.42372	5.45384	5.47249	5.67071	5.66555	5.62628	5.59973	5.65582	5.6865	5.84611	5.85619	5.8288
ENSMUSG00000112441.2	Gm48898	0.719085	0.440263	0.768453	1.84385	1.88376	1.90109	1.20732	1.50377	1.29372	2.09597	1.95252	1.9538
ENSMUSG00000037907.17	Ankrd13b	6.42951	6.40488	6.44418	6.2306	6.19489	6.21322	6.53532	6.52385	6.63771	6.06909	6.00928	6.06058
ENSMUSG00000022614.9	Lmf2	6.76075	6.72111	6.75907	7.10934	7.05337	7.07809	7.10879	7.16154	7.1992	7.08715	7.06917	7.15661
ENSMUSG00000028919.12	Arhgef19	5.42524	5.3898	5.4159	5.7239	5.75331	5.62214	4.75013	4.66618	4.67332	5.86704	5.86535	5.83941
ENSMUSG00000010911.13	Apip	4.17419	4.2373	4.15886	3.8832	3.93967	3.98287	3.9916	3.74128	3.92503	3.47895	3.38691	3.50631
ENSMUSG00000090086.8	AI480526	4.39354	4.32872	4.33666	2.58041	3.15769	3.01016	3.55492	3.38054	3.72717	2.88126	2.83577	3.08192
ENSMUSG00000027519.11	Rab22a	6.63532	6.59477	6.65853	6.38274	6.35783	6.37816	6.4781	6.49173	6.41542	6.28162	6.29991	6.21129
ENSMUSG00000031835.17	Mbtps1	8.30257	8.25624	8.32666	8.51851	8.5076	8.569	8.50781	8.50089	8.53162	7.99896	8.00497	7.95818
ENSMUSG00000027829.16	Ccnl1	6.6942	6.71308	6.6747	6.52353	6.49446	6.56576	6.52457	6.45421	6.47188	6.27882	6.38124	6.31191
ENSMUSG00000021814.18	Anxa7	7.53243	7.53488	7.62134	7.16459	7.13335	7.22164	7.02888	7.01214	6.99011	7.18655	7.09296	7.22907
ENSMUSG00000022799.5	Arhgap31	3.28843	3.34199	3.31587	3.98894	3.95982	3.92842	3.55741	3.69236	3.67076	4.12124	4.18394	3.91819
ENSMUSG00000000811.15	Txnrd3	4.7581	4.75911	4.85617	4.32843	4.23801	4.2724	5.03242	4.91224	5.06943	4.26186	4.20609	4.2058
ENSMUSG00000032902.2	Slc16a1	6.26392	6.29736	6.2693	5.86217	5.87811	5.81871	6.47711	6.43609	6.46222	5.8852	5.9494	5.93481
ENSMUSG00000034765.7	Dusp5	4.27375	4.12593	4.23128	5.11976	5.01367	5.03183	4.55996	4.66272	4.63082	4.76475	4.74346	4.85292
ENSMUSG00000081378.2	Rps13-ps4	3.77697	3.836	3.83728	2.96728	2.89709	3.01016	3.31162	3.41384	3.28252	2.86471	2.93193	3.13208
ENSMUSG00000021427.11	Ssr1	7.12353	7.08136	7.10879	7.60483	7.58911	7.65202	7.22474	7.22056	7.19712	7.41487	7.41383	7.40019
ENSMUSG00000034522.11	Zfp395	4.91676	5.05974	4.94601	5.42169	5.46692	5.50192	4.2377	4.19357	4.23491	5.45094	5.56739	5.45933
ENSMUSG00000032733.7	Snx33	5.63687	5.71333	5.72328	5.39545	5.51764	5.52678	6.01357	6.01801	6.00393	5.25086	5.24389	5.10562
ENSMUSG00000066475.7	Gm10268	2.77157	2.6196	2.67066	1.44631	1.40448	1.43565	2.0258	2.04001	2.10891	1.64716	1.56396	1.72017
ENSMUSG00000098975.8	Gm27177	6.16137	6.22297	6.15292	5.95793	5.96167	6.05789	6.01447	5.97171	6.00346	5.64661	5.74287	5.46717
ENSMUSG00000079481.12	Nhsl2	2.86416	2.91589	2.8566	4.31249	4.42597	4.20291	3.30572	3.35791	3.32883	3.95137	3.91146	3.57077
ENSMUSG00000031107.7	Rbmx2	3.51381	3.59513	3.46349	3.91697	3.79763	3.96059	3.18875	3.25755	3.09518	4.26439	4.21976	4.22442
ENSMUSG00000048126.17	Col6a3	7.64012	7.5139	7.57306	8.72941	8.75016	8.6763	7.80795	7.90718	7.85596	8.57964	8.53824	8.30592
ENSMUSG00000031015.9	Swap70	6.27113	6.23904	6.30609	6.61977	6.64594	6.68693	6.59128	6.64886	6.63157	6.68733	6.62034	6.59845
ENSMUSG00000021280.10	Exoc3l4	1.79876	1.46361	1.51799	1.95755	2.12888	2.084	2.33483	1.95208	2.05115	2.88126	2.81431	2.79692
ENSMUSG00000024045.7	Akap8	7.09969	7.13042	7.07569	7.26997	7.29524	7.31517	6.92035	6.86491	6.88478	7.46184	7.47126	7.38217
ENSMUSG00000000594.8	Gm2a	5.85055	5.92526	5.9077	6.28164	6.24809	6.21204	5.59308	5.59361	5.6004	6.25456	6.2611	6.37472
ENSMUSG00000078651.9	Aoc2	4.00962	3.63454	3.60521	2.93294	2.67945	2.82932	2.5647	2.70125	2.82919	2.57027	2.68229	2.67138
ENSMUSG00000020883.19	Fbxl20	6.79054	6.82375	6.79393	6.36385	6.42882	6.32464	6.51213	6.46683	6.50217	6.35545	6.36041	6.12557
ENSMUSG00000027680.16	Fxr1	7.44819	7.56928	7.52807	6.85597	6.9275	6.96744	7.13149	7.11885	7.03967	7.14552	7.11708	7.03665
ENSMUSG00000038456.10	Dennd2a	5.47307	5.57714	5.49087	5.73839	5.72415	5.77734	5.21195	5.32851	5.37842	6.05384	6.00415	5.93009
ENSMUSG00000029036.19	Atad3a	6.18175	6.09066	6.18844	5.86673	5.83148	5.9903	6.51948	6.52925	6.57442	5.69422	5.74192	5.71712
ENSMUSG00000000295.14	Hddc2	4.97085	4.97881	5.09393	4.59319	4.47696	4.67268	5.20562	5.29464	5.16867	4.34296	4.35228	4.48463
ENSMUSG00000029594.13	Rbm19	5.21806	5.25092	5.15372	4.77865	4.80768	4.83255	5.53057	5.593	5.61791	4.66218	4.72919	4.76769
ENSMUSG00000038387.10	Rras	6.2554	6.20876	6.19277	6.45712	6.3798	6.32246	5.82582	5.80707	5.85999	6.59928	6.60349	6.71822
ENSMUSG00000112673.2	Gm7413	3.62912	3.69169	3.69819	2.69139	2.60036	2.55472	3.15633	3.20779	3.08802	2.75403	2.82508	2.95762
ENSMUSG00000037740.9	Mrps26	5.30321	5.20586	5.29237	5.10596	4.98036	4.97461	5.5331	5.49463	5.53541	4.71299	4.77343	4.79908
ENSMUSG00000015790.17	Surf1	5.4381	5.41052	5.39953	5.05098	4.81045	4.84071	5.03777	5.01798	5.02136	4.81127	4.79277	4.90578
ENSMUSG00000039199.7	Zdhhc1	5.78692	5.86183	5.82597	5.50236	5.39289	5.37989	5.59308	5.64826	5.57885	5.40418	5.3895	5.38681
ENSMUSG00000033364.14	Usp37	4.28719	4.27051	4.12486	4.75428	4.79371	4.93801	4.44251	4.62175	4.5845	4.96126	4.92634	4.81145
ENSMUSG00000024962.14	Vegfb	6.18759	6.21121	6.20737	5.55749	5.58189	5.58742	5.83763	5.89665	6.0101	5.71883	5.68096	5.82474
ENSMUSG00000040473.16	Cfap69	3.6132	3.74891	3.61039	2.86171	2.82935	2.90128	2.84253	2.66944	2.74518	2.86137	2.72892	2.87362
ENSMUSG00000032968.5	Inha	2.05593	2.44222	2.39847	1.61175	1.45267	1.23984	1.89827	1.66917	1.72158	0.891186	0.900771	0.983036
ENSMUSG00000082163.3	Gm14276	0.550993	0.942223	1.00718	2.23063	1.94569	2.18996	1.06085	1.3402	1.68408	2.38306	2.38021	2.45723
ENSMUSG00000093954.9	Gm16867	6.74165	6.75418	6.69679	6.60294	6.6227	6.51347	6.58794	6.60147	6.61017	6.35426	6.39968	6.37888
ENSMUSG00000083282.4	Ctsf	3.25804	3.31193	3.53063	2.64123	2.56572	2.67365	2.44631	2.56462	2.58651	2.36434	2.42339	2.47807
ENSMUSG00000058542.4	Gm15590	6.19518	6.14497	6.27216	5.24541	5.08726	5.08172	6.01311	6.02655	6.02331	5.64757	5.63782	5.79495
ENSMUSG00000027248.14	Pdia3	8.44569	8.48574	8.43066	8.80197	8.8432	8.79157	8.69905	8.68689	8.65527	8.7253	8.75456	8.7446
ENSMUSG00000022561.14	Gpaa1	5.33753	5.24855	5.33994	5.78245	5.75619	5.75161	5.46258	5.45519	5.4804	5.6801	5.72668	5.80271
ENSMUSG00000029790.17	Cep41	3.25462	3.42017	3.57637	4.24131	4.16322	4.26484	3.80758	3.86481	3.83163	4.15566	4.19782	4.11726
ENSMUSG00000106258.2	Rpl7a-ps7	3.75053	3.82964	3.8417	3.01074	3.0396	2.93596	3.50686	3.40006	3.51925	2.9298	2.99372	3.14191
ENSMUSG00000082474.4	Gm8213	3.26485	3.1683	3.15496	2.14322	2.20963	2.09768	2.457	2.39157	2.42536	2.25175	2.12518	2.38184
ENSMUSG00000025451.16	Paip1	7.01665	7.04321	7.06393	6.72938	6.77356	6.76883	6.7637	6.73865	6.76414	6.71368	6.666	6.75683
ENSMUSG00000021614.17	Vcan	4.10946	4.1068	4.16062	5.76791	5.76957	5.85691	4.79506	4.77162	4.6994	4.74861	4.78911	4.57444
ENSMUSG00000057177.13	Gsk3a	6.70707	6.73816	6.63996	6.91588	6.81586	6.86044	6.46127	6.50047	6.55279	7.05012	7.05989	7.08795
ENSMUSG00000057969.16	Sema3b	3.81921	3.8528	3.78782	4.30042	4.37686	4.21864	4.05277	4.29535	4.10078	4.43552	4.51526	4.55863
ENSMUSG00000018425.19	Dhx40	6.20008	6.3571	6.29366	5.85715	5.93137	6.00851	5.95868	5.8749	5.89734	5.84906	5.83191	5.81249
ENSMUSG00000038279.11	Nop2	6.97729	6.92604	6.89931	6.661	6.68404	6.68891	7.3601	7.37066	7.36874	6.59478	6.63368	6.6305
ENSMUSG00000067713.8	Prkag1	5.64473	5.67546	5.64148	5.96091	6.0164	5.99898	5.87945	5.89763	5.88345	5.98621	6.00454	6.07005
ENSMUSG00000078816.11	Prkcg	2.67263	2.70073	2.67562	1.05746	1.37477	1.50913	1.47258	1.57419	1.74909	1.1092	1.52925	1.3872
ENSMUSG00000051246.4	Msantd1	2.76198	2.68205	2.26682	1.24828	1.44316	1.35821	1.80931	2.1094	2.09469	1.32782	1.04291	1.08163
ENSMUSG00000057789.15	Bak1	6.7529	6.72396	6.80075	7.06167	7.04534	7.04384	7.06405	7.08393	7.11912	7.06287	7.0688	7.11875
[truncated: 10,592 more rows]

## Sheet: EdgeR CTL vs DZ
GeneID	Chr	Start	End	Strand	Name	logFC	logCPM	F	PValue	FDR
ENSMUSG00000034459.9	chr19	34618270	34627409	+	Ifit1	-3.35023	6.00326	3237.83	8.25519e-22	1.03941e-17
ENSMUSG00000035692.8	chr4	156283911	156285253	-	Isg15	-3.61117	4.87946	2323.73	2.04716e-21	1.28879e-17
ENSMUSG00000026104.15	chr1	52158598	52201024	+	Stat1	-2.6145	5.21031	2039.45	6.39491e-21	2.551e-17
ENSMUSG00000045932.13	chr19	34528093	34553819	+	Ifit2	-1.54402	6.86399	1989.17	8.10421e-21	2.551e-17
ENSMUSG00000074896.4	chr19	34560930	34566131	+	Ifit3	-2.5051	6.34106	2283.52	1.2284e-20	3.09335e-17
ENSMUSG00000062488.10	chr19	34585369	34590801	+	Ifit3b	-2.55269	4.41719	1681.4	3.98843e-20	8.36972e-17
ENSMUSG00000046879.8	chr11	48752794	48762510	-	Irgm1	-1.71611	6.41619	1651.76	4.72015e-20	8.49019e-17
ENSMUSG00000037266.19	chr4	134650902	134654982	+	Rsrp1	1.15826	8.30218	1363.8	2.89069e-19	4.04408e-16
ENSMUSG00000040296.16	chr4	40203772	40239828	-	Ddx58	-1.62531	5.71458	1374.15	2.69154e-19	4.04408e-16
ENSMUSG00000040033.17	chr10	128106427	128128718	+	Stat2	-1.69507	6.00973	1328.77	3.69634e-19	4.65406e-16
ENSMUSG00000074934.4	chr2	113576508	113588991	-	Grem1	-1.54543	7.55563	1271.18	7.08584e-19	8.11071e-16
ENSMUSG00000047686.10	chrX	105880687	105884250	-	Rtl3	-2.58045	4.35913	1225.59	7.92816e-19	8.31862e-16
ENSMUSG00000002325.16	chr14	55841027	55847487	+	Irf9	-1.46881	5.59038	1157.98	1.3539e-18	1.3113e-15
ENSMUSG00000057346.13	chr15	77287988	77295335	-	Apol9a	-2.93817	4.03641	1131.68	1.68124e-18	1.51203e-15
ENSMUSG00000040483.16	chr11	72192454	72204559	+	Xaf1	-2.93337	3.4667	1116.97	1.90186e-18	1.59642e-15
ENSMUSG00000021957.8	chr14	30270315	30296677	+	Tkt	0.89523	8.38392	1056.67	3.20729e-18	2.52394e-15
ENSMUSG00000069874.8	chr11	58090443	58113608	+	Irgm2	-2.42833	3.598	1013.68	4.74141e-18	3.31661e-15
ENSMUSG00000022587.15	chr15	74826899	74831754	+	Ly6e	-0.934345	9.40973	1015.44	4.66434e-18	3.31661e-15
ENSMUSG00000033880.12	chr11	118283576	118292918	-	Lgals3bp	-1.43718	6.35317	954.227	8.36871e-18	4.69742e-15
ENSMUSG00000078922.10	chr11	48876153	48884999	-	Tgtp1	-3.16507	2.9002	960.437	7.87383e-18	4.69742e-15
ENSMUSG00000034422.15	chr16	35653243	35691914	-	Parp14	-1.97845	5.02355	951.689	8.58078e-18	4.69742e-15
ENSMUSG00000004105.9	chr2	33106080	33137729	+	Angptl2	0.832849	8.88737	959.563	7.94145e-18	4.69742e-15
ENSMUSG00000046718.9	chr8	71986898	71990100	-	Bst2	-1.54205	5.97169	965.588	7.4878e-18	4.69742e-15
ENSMUSG00000078921.4	chr11	48948020	48955033	-	Tgtp2	-3.18217	3.36729	933.977	1.02369e-17	5.37053e-15
ENSMUSG00000029561.18	chr5	115034996	115050295	+	Oasl2	-3.21915	4.09961	1122.73	1.26486e-17	6.37032e-15
ENSMUSG00000105987.5	chr5	23903293	23917665	-	AI506816	-0.862611	8.30917	893.934	1.54464e-17	7.20318e-15
ENSMUSG00000047735.15	chr6	3372256	3399572	-	Samd9l	-1.801	5.52623	927.768	1.51272e-17	7.20318e-15
ENSMUSG00000024164.16	chr17	57510969	57535136	-	C3	-1.17549	6.36939	887.19	1.65839e-17	7.45744e-15
ENSMUSG00000033355.7	chr16	23339040	23432972	+	Rtp4	-2.17213	4.22443	858.091	2.26741e-17	9.84445e-15
ENSMUSG00000029371.8	chr5	90907218	90909483	+	Cxcl5	-1.25191	6.84848	823.298	3.342e-17	1.40264e-14
ENSMUSG00000027996.14	chr3	83673627	83681623	+	Sfrp2	-1.47415	6.19114	782.467	5.44089e-17	2.20988e-14
ENSMUSG00000031461.5	chr8	15107652	15183541	+	Myom2	-1.85198	4.50542	774.007	5.95676e-17	2.3438e-14
ENSMUSG00000037211.13	chr3	37694095	37698747	+	Spry1	-1.13939	6.21655	766.158	6.55264e-17	2.50013e-14
ENSMUSG00000020609.15	chr12	8027647	8066835	+	Apob	-2.22964	4.15365	753.116	7.69377e-17	2.84918e-14
ENSMUSG00000063268.13	chr15	76115373	76127641	-	Parp10	-1.2483	5.55686	722.345	1.13615e-16	4.08722e-14
ENSMUSG00000062991.10	chr8	32304578	33374825	-	Nrg1	-0.93589	6.60311	712.933	1.28417e-16	4.49139e-14
ENSMUSG00000051379.13	chr2	140492833	140513389	-	Flrt3	-0.929077	6.81675	700.07	1.52206e-16	5.10047e-14
ENSMUSG00000074578.15	chr2	166904853	166907782	+	Zfas1	1.12307	6.66557	699.224	1.53934e-16	5.10047e-14
ENSMUSG00000025967.17	chr1	63215983	63219645	+	Eef1b2	0.836094	8.13249	685.658	1.84808e-16	5.96646e-14
ENSMUSG00000028270.13	chr3	142326362	142343769	+	Gbp2	-2.82658	2.82176	677.165	2.07589e-16	6.53438e-14
ENSMUSG00000022906.16	chr16	35758839	35792975	+	Parp9	-1.29739	4.95707	673.061	2.19694e-16	6.74674e-14
ENSMUSG00000045954.8	chr1	51328284	51342119	+	Cavin2	-1.02705	7.93773	662.301	2.553e-16	7.65353e-14
ENSMUSG00000040253.16	chr3	142236102	142255910	+	Gbp7	-2.7326	2.54726	650.502	3.01847e-16	8.83851e-14
ENSMUSG00000021453.3	chr13	52000713	52002504	+	Gadd45g	-1.19675	6.26062	646.779	3.18424e-16	8.90951e-14
ENSMUSG00000037742.15	chr9	78385730	78396433	-	Eef1a1	0.785969	12.6293	646.8	3.18327e-16	8.90951e-14
ENSMUSG00000052353.14	chr7	83582064	83735710	-	Cemip	-1.64632	5.27682	632.442	3.92321e-16	1.07385e-13
ENSMUSG00000026185.9	chr1	72897090	72914043	-	Igfbp5	-1.76628	4.75578	618.429	4.83253e-16	1.2946e-13
ENSMUSG00000073411.13	chr17	35481705	35486475	+	H2-D1	-0.779037	7.69531	616.446	4.97906e-16	1.30607e-13
ENSMUSG00000092203.8	chr17	35169213	35171447	-	1110038B12Rik	0.953667	7.15572	604.756	5.94924e-16	1.52871e-13
ENSMUSG00000073490.12	chr1	173550992	173569313	-	Ifi207	-2.31912	2.81362	601.155	6.28882e-16	1.58365e-13
ENSMUSG00000034994.11	chr10	81012464	81018332	+	Eef2	0.700343	12.6665	598.613	6.54135e-16	1.61494e-13
ENSMUSG00000027820.13	chr3	63148957	63293451	+	Mme	-0.952605	7.98729	583.693	8.26977e-16	2.0024e-13
ENSMUSG00000035916.9	chr10	107352909	107555912	-	Ptprq	-1.8655	3.50822	576.434	9.28863e-16	2.20666e-13
ENSMUSG00000027078.15	chr2	84629171	84640679	+	Ube2l6	-2.55403	2.71117	570.524	1.02209e-15	2.38316e-13
ENSMUSG00000078087.6	chr7	55663763	55664162	+	Rps12l1	0.958712	7.68181	569.068	1.0466e-15	2.39595e-13
ENSMUSG00000021806.5	chr14	19801332	19861855	+	Nid2	-0.692517	8.843	567.43	1.07497e-15	2.41696e-13
ENSMUSG00000040488.19	chr7	27004560	27037117	-	Ltbp4	1.14221	7.17983	617.394	1.39758e-15	3.08718e-13
ENSMUSG00000041481.18	chr12	104202503	104208198	+	Serpina3g	-1.20161	5.71487	540.435	1.68904e-15	3.59766e-13
ENSMUSG00000060036.15	chr15	79961991	79976069	-	Rpl3	0.679447	9.6466	539.566	1.7144e-15	3.59766e-13
ENSMUSG00000038507.7	chr6	39063343	39095283	-	Parp12	-1.39989	5.03772	540.346	1.6916e-15	3.59766e-13
ENSMUSG00000030790.16	chr7	110226867	110229027	+	Adm	-1.31971	4.43609	528.52	2.07631e-15	4.28571e-13
ENSMUSG00000082536.2	chr2	40445763	40447128	+	Gm13456	0.828149	9.35592	524.767	2.21785e-15	4.50402e-13
ENSMUSG00000021127.8	chr12	80154527	80159787	-	Zfp36l1	-0.844825	6.75572	522.982	2.2889e-15	4.57452e-13
ENSMUSG00000026536.10	chr1	173723910	173740612	-	Ifi211	-1.21998	5.08683	519.108	2.45189e-15	4.8237e-13
ENSMUSG00000040952.17	chr7	24583795	24589231	+	Rps19	0.799254	8.27808	504.363	3.20045e-15	6.19952e-13
ENSMUSG00000019866.16	chr10	43826631	44024849	-	Crybg1	-1.18367	4.86741	495.866	3.74446e-15	7.14341e-13
ENSMUSG00000027397.15	chr2	129040683	129053536	+	Slc20a1	-0.675701	7.34348	489.191	4.2436e-15	7.9748e-13
ENSMUSG00000029798.12	chr6	57557984	57641617	+	Herc6	-2.00213	3.60202	483.317	4.74412e-15	8.78429e-13
ENSMUSG00000010358.14	chr11	101339232	101349524	+	Ifi35	-1.28072	4.74906	481.942	4.87053e-15	8.88766e-13
ENSMUSG00000049502.18	chr16	35746880	35759521	-	Dtx3l	-1.5336	4.70114	469.372	6.27229e-15	1.1133e-12
ENSMUSG00000061353.12	chr6	117145495	117158328	+	Cxcl12	-0.722366	10.7921	468.722	6.29462e-15	1.1133e-12
ENSMUSG00000069862.7	chr8	123933361	123933760	+	Rps12-ps9	0.932698	6.91257	468.147	6.36624e-15	1.1133e-12
ENSMUSG00000038539.16	chr7	44461679	44466082	-	Atf5	0.647977	8.46027	451.808	8.83051e-15	1.52308e-12
ENSMUSG00000046352.8	chr14	57336056	57342159	-	Gjb2	-1.05262	6.23566	465.991	9.59914e-15	1.61624e-12
ENSMUSG00000090733.7	chr3	90119828	90120958	-	Rps27	0.884567	7.88266	458.963	1.00125e-14	1.61624e-12
ENSMUSG00000028936.16	chr4	152410198	152418528	+	Rpl22	0.632135	8.40089	447.43	9.65834e-15	1.61624e-12
ENSMUSG00000006333.15	chr7	3706991	3709896	+	Rps9	0.653936	9.03879	445.781	9.9921e-15	1.61624e-12
ENSMUSG00000032085.6	chr9	45840916	45847356	-	Tagln	0.657038	9.15802	446.396	9.86615e-15	1.61624e-12
ENSMUSG00000031778.14	chr8	95498636	95509055	+	Cx3cl1	-0.606401	7.72514	442.992	1.05857e-14	1.68715e-12
ENSMUSG00000051920.8	chr15	42884189	43034222	-	Rspo2	-0.901137	7.31303	439.514	1.13816e-14	1.79132e-12
ENSMUSG00000068196.6	chr16	57444620	57575100	-	Col8a1	-1.05465	5.73951	436.733	1.20655e-14	1.87552e-12
ENSMUSG00000021969.9	chr14	58070159	58127733	-	Zdhhc20	0.755945	6.92209	433.068	1.30373e-14	2.00186e-12
ENSMUSG00000039910.11	chr10	17598965	17601422	+	Cited2	-0.775269	7.59557	431.327	1.35289e-14	2.05231e-12
ENSMUSG00000024248.15	chr17	83809346	83824759	-	Cox7a2l	0.66227	7.16776	426.026	1.51562e-14	2.2718e-12
ENSMUSG00000024772.10	chr19	6326754	6350126	+	Ehd1	-0.638683	7.02476	423.458	1.60212e-14	2.31865e-12
ENSMUSG00000097354.8	chr6	129185374	129215688	-	2310001H17Rik	1.4306	3.68395	424.44	1.56842e-14	2.31865e-12
ENSMUSG00000031134.17	chrX	56428889	56438396	-	Rbmx	0.937278	4.90279	423.593	1.59744e-14	2.31865e-12
ENSMUSG00000026317.8	chr8	14931334	14951720	+	Cln8	-0.736825	7.1429	421.115	1.68582e-14	2.41206e-12
ENSMUSG00000058655.10	chr15	101982207	102005608	+	Eif4b	0.697424	10.0784	419.3	1.754e-14	2.48142e-12
ENSMUSG00000072772.4	chr6	124716145	124718337	-	Grcc10	0.99632	5.42825	415.477	1.9078e-14	2.66901e-12
ENSMUSG00000073489.7	chr1	173574858	173594509	-	Ifi204	-1.50295	4.30074	413.768	1.9813e-14	2.72097e-12
ENSMUSG00000068245.15	chr14	59584855	59602919	-	Phf11d	-2.76052	3.64222	553.868	1.98816e-14	2.72097e-12
ENSMUSG00000060519.12	chr1	156481186	156501926	-	Tor3a	-0.942183	5.73052	412.261	2.04873e-14	2.77371e-12
ENSMUSG00000096210.3	chr15	78912649	78914704	+	H1f0	0.683933	7.69207	411.466	2.08528e-14	2.79317e-12
ENSMUSG00000086841.2	chr11	62493702	62495633	+	2410006H16Rik	0.848347	7.53931	414.019	2.11163e-14	2.79869e-12
ENSMUSG00000049401.11	chr2	180231037	180237629	+	Ogfr	-0.708618	6.24875	410.236	2.14331e-14	2.81109e-12
ENSMUSG00000079435.10	chrX	133486402	133488811	+	Rpl36a	0.810131	7.66382	409.349	2.18628e-14	2.83788e-12
ENSMUSG00000074743.5	chr2	148246385	148250108	-	Thbd	-1.56917	4.16531	404.733	2.42578e-14	3.11663e-12
ENSMUSG00000082035.2	chrX	95528464	95529085	+	Rpl17-ps8	0.698725	6.58009	399.187	2.75258e-14	3.50078e-12
ENSMUSG00000022283.16	chr15	36595904	36609912	-	Pabpc1	0.594579	10.8549	397.519	2.86015e-14	3.60122e-12
ENSMUSG00000024803.10	chr19	36089360	36097499	-	Ankrd1	-2.09947	2.47663	396.248	2.94525e-14	3.67165e-12
ENSMUSG00000039405.8	chr7	89156990	89176395	-	Prss23	-0.586253	8.01636	392.087	3.24405e-14	4.00449e-12
ENSMUSG00000001493.10	chr11	101768335	101785200	-	Meox1	-0.895427	5.4543	390.39	3.37532e-14	4.12383e-12
ENSMUSG00000023055.11	chr15	102615211	102630613	-	Calcoco1	0.632253	7.18876	390.002	3.40623e-14	4.12383e-12
ENSMUSG00000031029.7	chr7	108533623	108542158	+	Eif3f	0.602856	7.70252	389.484	3.44791e-14	4.13453e-12
ENSMUSG00000108414.2	chr19	8700838	8703807	+	Snhg1	0.702095	6.69432	385.983	3.7447e-14	4.44807e-12
ENSMUSG00000055172.11	chr6	124489363	124500402	+	C1ra	-0.792906	6.85794	383.278	3.99334e-14	4.69908e-12
ENSMUSG00000027227.8	chr2	122065229	122095821	+	Sord	1.12291	4.54944	382.608	4.05776e-14	4.73067e-12
ENSMUSG00000028063.16	chr3	88387453	88417263	-	Lmna	0.532534	9.08019	382.014	4.11577e-14	4.75428e-12
ENSMUSG00000061983.8	chr10	23661080	23663173	-	Rps12	0.901191	7.72	424.542	4.45783e-14	5.1026e-12
ENSMUSG00000002831.15	chr17	56407590	56416803	-	Plin4	1.0015	5.28507	377.213	4.61999e-14	5.24057e-12
ENSMUSG00000024308.16	chr17	34134872	34148266	+	Tapbp	-0.527105	7.90431	372.786	5.14591e-14	5.78502e-12
ENSMUSG00000028792.15	chr4	128885750	128905322	+	Ak2	-0.720107	6.43508	365.171	6.21231e-14	6.92205e-12
ENSMUSG00000019850.12	chr10	18876657	18891405	-	Tnfaip3	-1.16668	4.85302	364.276	6.35291e-14	6.95519e-12
ENSMUSG00000067212.9	chr17	36340664	36343747	-	H2-T23	-1.05045	4.83684	364.013	6.39484e-14	6.95519e-12
ENSMUSG00000028107.15	chr3	95647287	95667518	-	Tars2	-0.864053	5.15952	363.932	6.40776e-14	6.95519e-12
ENSMUSG00000019970.16	chr10	21758082	21875802	+	Sgk1	-0.598112	7.94767	363.248	6.51873e-14	7.01516e-12
ENSMUSG00000042115.5	chr1	132226363	132235095	+	Klhdc8a	-0.844306	5.3569	362.423	6.65533e-14	7.04179e-12
ENSMUSG00000007892.9	chr9	61820565	61821824	-	Rplp1	0.672977	9.7579	362.748	6.60111e-14	7.04179e-12
ENSMUSG00000001473.8	chr18	67523786	67535819	+	Tubb6	-0.858741	7.02073	361.498	6.81211e-14	7.065e-12
ENSMUSG00000026896.15	chr2	62426141	62476599	-	Ifih1	-1.53579	3.73144	361.582	6.79768e-14	7.065e-12
ENSMUSG00000038521.18	chr6	124507303	124519318	-	C1s1	-0.625891	7.31816	361.304	6.8456e-14	7.065e-12
ENSMUSG00000082193.2	chr1	14935295	14936189	+	Rpl5-ps1	0.693796	5.75226	359.001	7.25648e-14	7.39775e-12
ENSMUSG00000002763.17	chr17	47022388	47036467	+	Pex6	0.797902	5.54543	358.843	7.28553e-14	7.39775e-12
ENSMUSG00000020828.14	chr11	70430889	70448936	+	Pld2	0.936086	4.86671	354.643	8.11043e-14	8.16947e-12
ENSMUSG00000000275.17	chr11	88890201	88911119	+	Trim25	-0.939333	5.90413	354.099	8.22473e-14	8.21886e-12
ENSMUSG00000031402.13	chrX	74153338	74174622	-	Mpp1	0.702428	6.64053	353.529	8.34611e-14	8.27448e-12
ENSMUSG00000028037.14	chr3	151436558	151455597	-	Ifi44	-2.84732	5.07692	914.775	8.72938e-14	8.58684e-12
ENSMUSG00000029385.15	chr5	93415115	93424090	+	Ccng2	0.725614	5.83883	350.585	9.00651e-14	8.72315e-12
ENSMUSG00000037563.16	chr7	28050076	28052580	+	Rps16	0.621071	7.91927	350.646	8.99225e-14	8.72315e-12
ENSMUSG00000022814.7	chr16	33775151	33787408	-	Umps	-0.755274	6.25573	350.269	9.08059e-14	8.72776e-12
ENSMUSG00000030122.13	chr6	124890643	124897066	-	Ptms	0.593159	8.71451	348.473	9.51562e-14	9.0766e-12
ENSMUSG00000068267.6	chr2	131017101	131021987	-	Cenpb	-0.622723	6.63441	343.642	1.0804e-13	1.02281e-11
ENSMUSG00000100078.2	chr1	128447809	128449197	-	Gm6170	0.825474	6.21697	341.55	1.14209e-13	1.06519e-11
ENSMUSG00000008682.14	chrX	73314417	73316741	+	Rpl10	0.633599	8.93658	341.82	1.13391e-13	1.06519e-11
ENSMUSG00000006800.15	chr2	165915008	165997583	-	Sulf2	-0.62815	7.29682	340.57	1.17232e-13	1.08534e-11
ENSMUSG00000027848.13	chr3	103629537	103645317	-	Olfml3	-1.17835	5.17278	337.592	1.26971e-13	1.16693e-11
ENSMUSG00000057143.16	chr7	103987960	104002569	-	Trim12c	-1.89709	2.69226	333.816	1.4063e-13	1.28309e-11
ENSMUSG00000078606.9	chr7	105544345	105603174	-	Gvin2	-1.50124	5.66529	514.753	1.52225e-13	1.37889e-11
ENSMUSG00000060419.9	chr5	129205140	129205581	-	Rps16-ps2	0.678044	7.95469	329.646	1.57631e-13	1.41131e-11
ENSMUSG00000086583.4	chr7	114304451	114305470	-	Gm15500	0.633661	8.60825	329.55	1.58046e-13	1.41131e-11
ENSMUSG00000010554.15	chr11	74661655	74719351	+	Mettl16	-0.748095	6.0404	324.199	1.83344e-13	1.62569e-11
ENSMUSG00000024900.6	chr19	3372333	3435733	+	Cpt1a	0.979928	5.28829	321.218	1.99358e-13	1.73112e-11
ENSMUSG00000105388.2	chr3	145584774	145585095	+	Rpl36a-ps2	0.84452	6.29574	321.487	1.97851e-13	1.73112e-11
ENSMUSG00000032604.17	chr9	108384904	108393140	+	Qars	0.661079	6.51124	321.256	1.99146e-13	1.73112e-11
ENSMUSG00000086290.10	chr4	132035933	132038335	+	Snhg12	0.937368	5.93264	330.638	2.16364e-13	1.85323e-11
ENSMUSG00000032291.9	chr9	54672031	54680394	+	Crabp1	-1.17016	6.84993	403.094	2.15716e-13	1.85323e-11
ENSMUSG00000041935.11	chr15	4011516	4025226	-	AW549877	0.612426	6.94647	317.659	2.20531e-13	1.87616e-11
ENSMUSG00000027074.15	chr2	84766922	84788853	+	Slc43a3	-0.957864	4.40312	316.782	2.26121e-13	1.91079e-11
ENSMUSG00000058297.17	chr10	59942040	59971020	+	Spock2	1.27721	3.48125	315.559	2.34181e-13	1.96572e-11
ENSMUSG00000034160.14	chrX	100683665	100727957	+	Ogt	0.567548	8.83937	315.22	2.36471e-13	1.97179e-11
ENSMUSG00000022887.10	chr16	23268166	23339565	-	Masp1	-0.541515	7.91918	313.167	2.50874e-13	2.07813e-11
ENSMUSG00000069793.13	chr11	82869215	82882656	-	Slfn9	-0.930372	5.92695	311.491	2.63357e-13	2.1532e-11
ENSMUSG00000019432.16	chr17	35460721	35472683	+	Ddx39b	-0.544561	8.01338	311.574	2.62724e-13	2.1532e-11
ENSMUSG00000046318.17	chr18	66178372	66435812	-	Ccbe1	-0.795345	5.86495	306.933	3.00912e-13	2.44437e-11
ENSMUSG00000034656.19	chr8	85065267	85366875	+	Cacna1a	-0.927531	5.39612	306.478	3.04978e-13	2.46152e-11
ENSMUSG00000035258.16	chr16	56298240	56510498	+	Abi3bp	-0.562443	8.01552	304.69	3.21541e-13	2.57867e-11
ENSMUSG00000020241.14	chr10	76431595	76459464	-	Col6a2	-0.5562	9.85872	303.442	3.33684e-13	2.65912e-11
ENSMUSG00000114003.2	chr13	3348886	3349667	+	Gm9616	0.613345	7.44665	303.08	3.37297e-13	2.67101e-11
ENSMUSG00000038975.15	chr3	153612923	153618646	-	Rabggtb	0.647572	5.75428	302.491	3.43276e-13	2.70137e-11
ENSMUSG00000052146.17	chr17	27849391	27855643	-	Rps10	0.658025	8.42643	301.95	3.4888e-13	2.72265e-11
ENSMUSG00000045868.13	chr7	105755762	105814533	-	Gvin1	-1.48095	5.71001	493.006	3.52468e-13	2.72265e-11
ENSMUSG00000056144.15	chr7	103893663	103911441	+	Trim34a	-2.19203	1.86506	301.725	3.5123e-13	2.72265e-11
ENSMUSG00000072620.4	chr11	82955937	82961504	+	Slfn2	-1.94381	2.57204	300.985	3.59104e-13	2.72378e-11
ENSMUSG00000067038.7	chr19	59310802	59311198	+	Rps12-ps3	0.944512	7.98935	408.607	3.58309e-13	2.72378e-11
ENSMUSG00000038775.15	chr9	118881845	118900593	+	Vill	0.891874	5.11409	301.218	3.56601e-13	2.72378e-11
ENSMUSG00000053332.14	chr1	160861991	160866109	+	Gas5	0.87508	7.43728	359.922	3.76955e-13	2.84206e-11
ENSMUSG00000074129.15	chr7	44774981	44778185	-	Rpl13a	0.608113	9.78557	297.634	3.97292e-13	2.97147e-11
ENSMUSG00000032334.11	chr9	58195020	58220469	-	Loxl1	0.599713	9.01644	297.506	3.98839e-13	2.97147e-11
ENSMUSG00000048007.5	chrX	133438004	133442614	-	Timm8a1	-0.853196	5.15985	296.718	4.08498e-13	3.02553e-11
ENSMUSG00000048387.9	chr12	9620115	9631500	+	Osr1	-0.90646	5.4814	295.972	4.17888e-13	3.07697e-11
ENSMUSG00000026069.16	chr1	40468729	40504575	+	Il1rl1	-0.624158	10.3891	295.579	4.22921e-13	3.08539e-11
ENSMUSG00000040010.11	chr8	122607888	122634433	-	Slc7a5	-0.523525	8.96635	295.501	4.23931e-13	3.08539e-11
ENSMUSG00000066543.9	chr7	35817698	35818253	+	Rpl17-ps9	0.683411	6.14015	295.092	4.2926e-13	3.10621e-11
ENSMUSG00000037379.8	chr5	33355527	33375799	-	Spon2	-1.40591	4.60346	294.359	4.39e-13	3.15854e-11
ENSMUSG00000001248.16	chr7	30829551	30855321	-	Gramd1a	0.587516	6.66648	292.247	4.68446e-13	3.35125e-11
ENSMUSG00000045817.9	chr17	84491358	84495375	-	Zfp36l2	-0.463514	8.9759	291.079	4.85656e-13	3.45474e-11
ENSMUSG00000058558.13	chr5	108048367	108056871	+	Rpl5	0.587234	8.88501	290.362	4.96573e-13	3.51256e-11
ENSMUSG00000039323.19	chr1	72863661	72891633	+	Igfbp2	-1.43974	3.99049	289.943	5.0308e-13	3.5387e-11
ENSMUSG00000030276.20	chr6	113366220	113391548	+	Ttll3	1.20455	3.88435	286.7	5.56712e-13	3.8942e-11
ENSMUSG00000023944.15	chr17	45878700	45884197	-	Hsp90ab1	0.572213	11.0849	285.311	5.81598e-13	4.0458e-11
ENSMUSG00000081344.6	chr2	172351440	172351611	-	Gm14303	0.865065	5.82574	284.658	5.93707e-13	4.10734e-11
ENSMUSG00000032198.10	chr9	21711155	21763931	-	Dock6	1.0096	4.4524	283.881	6.08497e-13	4.18666e-11
ENSMUSG00000028495.15	chr4	86772896	86775649	-	Rps6	0.619711	8.72459	283.274	6.20333e-13	4.2449e-11
ENSMUSG00000047675.16	chr4	117011023	117013440	-	Rps8	0.576435	8.86188	281.838	6.49356e-13	4.41948e-11
ENSMUSG00000007655.17	chr6	17306333	17341451	+	Cav1	-0.477875	9.77981	280.992	6.67159e-13	4.51624e-11
ENSMUSG00000110679.2	chr8	94949620	94950262	+	Rpl10-ps5	0.631489	6.29406	280.702	6.73374e-13	4.5253e-11
ENSMUSG00000032596.15	chr9	107852703	107861259	+	Uba7	-1.347	3.39049	280.595	6.75686e-13	4.5253e-11
ENSMUSG00000028069.17	chr3	87950414	87963300	+	Gpatch4	-0.788572	5.10327	279.217	7.0627e-13	4.70511e-11
ENSMUSG00000059070.17	chr7	45364880	45370260	+	Rpl18	0.592894	8.42283	278.232	7.29068e-13	4.83142e-11
ENSMUSG00000038774.10	chr10	50468764	50727581	+	Ascc3	-0.61087	6.62544	276.866	7.62041e-13	5.02349e-11
ENSMUSG00000040354.15	chr10	127132089	127147655	-	Mars1	-0.469623	7.92167	276.055	7.82382e-13	5.13072e-11
ENSMUSG00000066407.4	chr13	73465962	73466262	+	Gm10263	0.754244	5.62499	275.25	8.03185e-13	5.21284e-11
ENSMUSG00000066357.7	chr9	108449509	108455938	-	Wdr6	0.545494	7.14804	275.382	7.99722e-13	5.21284e-11
ENSMUSG00000021913.9	chr14	32043975	32070108	+	Ogdhl	1.56374	3.63737	274.833	8.14175e-13	5.25706e-11
ENSMUSG00000047676.7	chr3	149778294	149779179	-	Rpsa-ps10	0.631478	8.02899	274.208	8.31014e-13	5.33841e-11
ENSMUSG00000024608.12	chr18	60880169	60911618	+	Rps14	0.529228	8.68889	272.729	8.72352e-13	5.52096e-11
ENSMUSG00000052684.5	chr4	94937270	94940459	-	Jun	-0.574945	6.93332	272.569	8.76969e-13	5.52096e-11
ENSMUSG00000002602.17	chr7	25456697	25488130	-	Axl	-0.435186	9.40426	272.656	8.74455e-13	5.52096e-11
ENSMUSG00000098181.2	chr8	36492906	36493287	+	Rps12-ps24	1.00628	4.48752	272.89	8.6774e-13	5.52096e-11
ENSMUSG00000028184.13	chr3	148521218	148696191	-	Adgrl2	-0.582673	8.02879	272.168	8.88627e-13	5.56652e-11
ENSMUSG00000113948.2	chr12	67557529	67558085	+	Rpl17-ps3	0.691129	6.89965	271.99	8.93853e-13	5.57153e-11
ENSMUSG00000081406.5	chr2	75021416	75022166	-	Rps6-ps4	0.638938	7.56115	268.789	9.9401e-13	6.16531e-11
ENSMUSG00000027750.17	chr3	54268529	54298458	+	Postn	-0.487718	11.4437	268.361	1.00834e-12	6.1932e-11
ENSMUSG00000031398.14	chrX	73372671	73388295	+	Plxna3	0.737321	6.36121	268.418	1.0064e-12	6.1932e-11
ENSMUSG00000073702.12	chr1	39406922	39410992	+	Rpl31	0.659268	7.70119	267.773	1.02836e-12	6.2452e-11
ENSMUSG00000046329.15	chr17	57350710	57366863	-	Slc25a23	1.57382	3.18318	267.676	1.03169e-12	6.2452e-11
ENSMUSG00000031320.10	chrX	101228546	101233000	-	Rps4x	0.561258	9.78718	267.828	1.02647e-12	6.2452e-11
ENSMUSG00000081895.4	chr7	72298504	72299059	-	Rpl17-ps10	0.673742	7.03974	267.223	1.04748e-12	6.31041e-11
ENSMUSG00000041842.16	chr3	84349504	84387736	-	Fhdc1	-0.558147	6.48891	265.473	1.11103e-12	6.66141e-11
ENSMUSG00000022003.8	chr14	75997556	76024477	-	Slc25a30	0.563409	6.7102	263.55	1.1858e-12	7.07601e-11
ENSMUSG00000028811.13	chr4	129083552	129113400	+	Yars	-0.490103	7.51972	262.96	1.20986e-12	7.18555e-11
ENSMUSG00000021835.16	chr14	46620976	46628126	-	Bmp4	-0.810545	4.98134	261.427	1.27487e-12	7.5361e-11
ENSMUSG00000022450.7	chr15	82234340	82238523	-	Ndufa6	0.709963	6.11751	260.168	1.33116e-12	7.8321e-11
ENSMUSG00000032399.9	chr9	64080656	64085948	+	Rpl4	0.467051	10.7134	259.646	1.35529e-12	7.93698e-11
ENSMUSG00000046324.13	chr19	29585613	29625815	-	Ermp1	-0.625044	6.18819	258.63	1.40372e-12	8.1825e-11
ENSMUSG00000009927.10	chr9	44318435	44321724	+	Rps25	0.659844	8.38472	266.735	1.43955e-12	8.35273e-11
ENSMUSG00000017830.16	chr11	100585709	100595097	-	Dhx58	-2.32087	2.36054	256.459	1.51361e-12	8.72219e-11
ENSMUSG00000028919.12	chr4	140966809	140984875	+	Arhgef19	0.713983	5.4822	256.394	1.51708e-12	8.72219e-11
ENSMUSG00000019851.9	chr10	18720767	18732821	+	Perp	-1.22361	7.20853	477.199	1.54867e-12	8.86329e-11
ENSMUSG00000029380.12	chr5	91039099	91040974	+	Cxcl1	-1.49594	3.6687	255.247	1.57911e-12	8.99666e-11
ENSMUSG00000015766.15	chr6	137454242	137631874	-	Eps8	-0.59156	7.00601	253.64	1.67079e-12	9.47609e-11
ENSMUSG00000092274.4	chr19	5874735	5895506	-	Neat1	-0.714596	8.71995	284.996	1.68746e-12	9.52772e-11
ENSMUSG00000022884.17	chr16	22926193	22932886	+	Eif4a2	0.427115	8.31001	252.185	1.7589e-12	9.88676e-11
ENSMUSG00000037608.17	chr10	20188214	20220359	+	Bclaf1	0.638896	7.70336	252.006	1.77007e-12	9.90117e-11
ENSMUSG00000086427.9	chr6	52221372	52226779	+	Hoxa11os	0.741764	5.42916	251.893	1.77719e-12	9.90117e-11
ENSMUSG00000100801.2	chr5	5831614	5833555	-	Gm15459	0.609124	8.5553	250.872	1.84285e-12	1.02217e-10
ENSMUSG00000052125.17	chr12	33161709	33197596	-	F730043M19Rik	-1.18915	3.26209	250.601	1.86069e-12	1.02489e-10
ENSMUSG00000028128.14	chr3	121517185	121528697	+	F3	-0.639662	7.20478	250.551	1.86404e-12	1.02489e-10
ENSMUSG00000046721.12	chr7	44974388	44975041	+	Rpl14-ps1	0.626913	7.05034	249.952	1.90425e-12	1.04245e-10
ENSMUSG00000022094.16	chr14	70540917	70588874	-	Slc39a14	-0.535708	6.76952	249.161	1.95893e-12	1.06774e-10
ENSMUSG00000055435.7	chr8	116409680	116434533	-	Maf	-0.532285	6.48219	248.791	1.98506e-12	1.07732e-10
ENSMUSG00000025534.18	chr5	130017851	130031890	-	Gusb	-0.567485	6.56633	248.656	1.99471e-12	1.07792e-10
ENSMUSG00000070003.8	chr8	71050139	71061522	-	Ssbp4	1.15292	4.39087	248.498	2.00607e-12	1.07942e-10
ENSMUSG00000024843.16	chr19	3901772	3944369	+	Chka	-0.526522	7.81224	247.948	2.04607e-12	1.08791e-10
ENSMUSG00000041453.13	chr5	146769699	146773842	+	Rpl21	0.583422	6.26647	247.947	2.04614e-12	1.08791e-10
ENSMUSG00000025794.10	chr9	120400509	120403720	+	Rpl14	0.582413	8.23313	247.925	2.04776e-12	1.08791e-10
ENSMUSG00000058443.6	chr9	50255500	50256268	-	Rpl10-ps3	0.62685	7.39089	247.687	2.06538e-12	1.09265e-10
ENSMUSG00000069662.6	chr10	37009370	37014916	-	Marcks	-0.533582	9.25247	246.754	2.1361e-12	1.12534e-10
ENSMUSG00000022797.17	chr16	32427737	32451612	+	Tfrc	-0.808474	5.39433	246.151	2.18325e-12	1.14064e-10
ENSMUSG00000024571.16	chr18	80249979	80255956	+	Gm16286	-0.608262	6.78028	246.241	2.17616e-12	1.14064e-10
ENSMUSG00000054136.7	chr15	89206922	89208934	+	Adm2	-0.84691	4.84051	245.796	2.21149e-12	1.15061e-10
ENSMUSG00000058838.10	chr9	83291712	83292179	+	Rps27a-ps2	0.608577	6.68452	245.54	2.23218e-12	1.1566e-10
ENSMUSG00000044424.5	chr19	23597112	23597683	+	Gm9493	0.597996	6.26085	245.351	2.24756e-12	1.1598e-10
ENSMUSG00000078853.9	chr11	58090381	58098417	+	Igtp	-2.37656	3.44192	348.303	2.2619e-12	1.16243e-10
ENSMUSG00000020869.9	chr11	94520592	94536042	+	Lrrc59	-0.526713	7.88393	245.056	2.27174e-12	1.16274e-10
ENSMUSG00000090272.10	chr1	173676691	173708447	-	Mndal	-1.99895	1.78187	244.902	2.2845e-12	1.16454e-10
ENSMUSG00000024457.17	chr17	37148025	37170290	+	Trim26	-0.592693	6.3898	244.323	2.33326e-12	1.1846e-10
ENSMUSG00000015656.18	chr9	40712279	40721383	+	Hspa8	0.592033	10.3596	244.072	2.35472e-12	1.1907e-10
ENSMUSG00000020888.17	chr11	69891420	69903127	+	Dvl2	0.536087	6.43162	243.945	2.36564e-12	1.19143e-10
ENSMUSG00000037816.11	chr13	50571899	50587816	+	Fbxw17	-0.807271	4.5908	243.687	2.38809e-12	1.19794e-10
ENSMUSG00000115338.3	chr14	51168538	51202694	+	Pnp	-0.614247	6.54464	243.439	2.40983e-12	1.20405e-10
ENSMUSG00000001870.17	chr17	75312562	75699507	+	Ltbp1	-0.542933	8.77193	243.121	2.43803e-12	1.21333e-10
ENSMUSG00000001436.16	chr10	76868074	76896836	+	Slc19a1	-0.74628	5.40396	242.528	2.49169e-12	1.22379e-10
ENSMUSG00000020785.18	chr11	72909833	72932899	+	Camkk1	1.32963	3.45723	242.519	2.49253e-12	1.22379e-10
ENSMUSG00000087142.8	chr4	43504427	43508747	-	Gm12454	1.95599	2.00647	242.46	2.49793e-12	1.22379e-10
ENSMUSG00000107176.2	chr6	66852304	66852727	-	Gm9794	0.597052	7.64275	242.753	2.47115e-12	1.22379e-10
ENSMUSG00000021556.13	chr13	59782439	59823625	-	Golm1	-0.889614	4.6504	240.858	2.64983e-12	1.29318e-10
ENSMUSG00000020372.16	chr11	48691158	48697261	+	Rack1	0.53029	10.0428	240.468	2.68835e-12	1.30691e-10
ENSMUSG00000045055.6	chr10	128612239	128613119	-	Rpsa-ps2	0.622941	7.12527	240.31	2.70411e-12	1.30952e-10
ENSMUSG00000011257.20	chr4	123156143	123192718	+	Pabpc4	0.526396	7.36328	240.021	2.73325e-12	1.31856e-10
ENSMUSG00000020464.16	chr11	29080743	29111828	+	Pnpt1	-0.586388	5.57709	239.707	2.76524e-12	1.32416e-10
ENSMUSG00000008668.16	chr17	34170972	34174975	-	Rps18	0.588485	9.12247	239.701	2.76589e-12	1.32416e-10
ENSMUSG00000097048.8	chr6	86503228	86559448	+	1600020E01Rik	-1.15107	3.64608	239.516	2.78492e-12	1.32822e-10
ENSMUSG00000054203.8	chr1	173839563	173859376	-	Ifi205	-1.57142	3.34647	239.285	2.80895e-12	1.33462e-10
ENSMUSG00000037003.17	chr15	102008847	102024836	+	Tns2	0.430458	8.02338	238.139	2.93152e-12	1.38762e-10
ENSMUSG00000079139.5	chr1	135159732	135160963	+	Gm4204	0.538023	7.02001	237.163	3.04061e-12	1.43278e-10
ENSMUSG00000043243.16	chr8	72050291	72060580	+	Niban3	1.74369	2.16402	237.083	3.04968e-12	1.43278e-10
ENSMUSG00000080859.2	chr2	105384545	105385190	-	Rpl10-ps1	0.624993	7.19798	236.05	3.17052e-12	1.48402e-10
ENSMUSG00000042408.14	chr4	126971175	127018165	+	Zmym6	0.68396	5.62775	235.418	3.247e-12	1.51418e-10
ENSMUSG00000063506.15	chr14	32935982	33091891	+	Arhgap22	-0.518594	6.67429	234.8	3.32366e-12	1.54421e-10
ENSMUSG00000020534.15	chr11	60678929	60702544	-	Shmt1	-0.743661	5.30871	234.024	3.42287e-12	1.58446e-10
ENSMUSG00000022602.15	chr15	74540931	74544419	-	Arc	-1.13196	3.85989	233.896	3.43962e-12	1.58638e-10
ENSMUSG00000004221.17	chrX	73436895	73497460	+	Ikbkg	0.59147	6.1898	233.693	3.46626e-12	1.59283e-10
ENSMUSG00000029782.21	chr6	30479051	30509782	-	Tmem209	-0.541879	6.39906	232.987	3.56073e-12	1.6303e-10
ENSMUSG00000030116.15	chr6	122482803	122506249	+	Mfap5	-0.746291	6.12981	232.407	3.6404e-12	1.66073e-10
ENSMUSG00000035049.5	chr19	41851289	41884612	-	Rrp12	-0.691629	5.40183	232.151	3.6761e-12	1.67097e-10
ENSMUSG00000080885.2	chr19	37272553	37273195	-	Rpl10-ps6	0.619876	6.85112	231.068	3.83207e-12	1.7232e-10
ENSMUSG00000034855.14	chr5	92494496	92496748	-	Cxcl10	-3.10311	3.58908	462.724	3.80483e-12	1.7232e-10
ENSMUSG00000095649.4	chr7	105675957	105683253	-	Gvin-ps3	-1.4118	2.75181	231.081	3.8301e-12	1.7232e-10
ENSMUSG00000017144.9	chr2	51020449	51039123	-	Rnd3	-0.479705	7.96451	230.742	3.8803e-12	1.73868e-10
ENSMUSG00000031673.7	chr8	103358726	103512274	-	Cdh11	-0.623499	7.66111	230.462	3.92233e-12	1.75128e-10
ENSMUSG00000005198.16	chr11	69624822	69649463	-	Polr2a	0.573272	8.00685	230.339	3.94101e-12	1.7534e-10
ENSMUSG00000037552.18	chr7	28059028	28072024	-	Plekhg2	0.648875	5.668	230.167	3.96722e-12	1.75885e-10
ENSMUSG00000027208.15	chr2	125876577	125933105	+	Fgf7	-0.528968	7.15228	229.624	4.05129e-12	1.78982e-10
ENSMUSG00000022537.19	chr16	30330672	30369660	-	Tmem44	0.822436	4.58364	229.106	4.13315e-12	1.8196e-10
ENSMUSG00000034947.14	chr11	101473067	101482614	+	Tmem106a	-1.20397	3.14784	228.861	4.17262e-12	1.83057e-10
ENSMUSG00000074071.12	chr7	67923586	68012840	+	Fam169b	-1.4519	2.84247	227.889	4.33312e-12	1.89439e-10
ENSMUSG00000024079.5	chr17	79159992	79190002	-	Eif2ak2	-1.1317	5.86277	328.531	4.73851e-12	2.06445e-10
ENSMUSG00000041560.13	chr7	15670107	15679999	-	Nop53	0.511107	6.67923	225.151	4.82317e-12	2.09409e-10
ENSMUSG00000033491.14	chr9	86625701	86640496	+	Prss35	-1.5095	4.06962	224.992	4.85347e-12	2.1e-10
ENSMUSG00000025223.16	chr19	46020008	46033653	-	Ldb1	0.407279	7.69737	224.215	5.00462e-12	2.15062e-10
ENSMUSG00000046186.9	chr9	78522827	78623535	+	Cd109	-0.678925	6.7318	224.231	5.00143e-12	2.15062e-10
ENSMUSG00000038459.11	chr7	83758563	83801101	-	Abhd17c	-0.619679	5.77313	223.995	5.04819e-12	2.16196e-10
ENSMUSG00000067274.11	chr5	115697525	115701786	+	Rplp0	0.585873	10.692	223.256	5.19825e-12	2.20374e-10
ENSMUSG00000036854.15	chr7	30251602	30254868	+	Hspb6	0.569812	6.84474	223.408	5.16692e-12	2.20374e-10
ENSMUSG00000041775.8	chr7	138437551	138448002	-	Mapk1ip1	1.23658	3.24373	223.3	5.1892e-12	2.20374e-10
ENSMUSG00000047649.10	chr7	19089938	19093408	-	Cd3eap	-0.809811	4.791	222.726	5.3087e-12	2.24301e-10
ENSMUSG00000037321.18	chr17	34406526	34416199	+	Tap1	-1.4045	2.96827	222.503	5.35593e-12	2.2554e-10
ENSMUSG00000002844.10	chr16	38264391	38273065	-	Adprh	-0.533275	6.09387	221.902	5.48572e-12	2.29471e-10
ENSMUSG00000031378.15	chrX	72760202	72782140	+	Abcd1	0.914261	4.41538	221.965	5.47208e-12	2.29471e-10
ENSMUSG00000038604.10	chr8	106331886	106348851	+	Ripor1	0.500899	6.93493	221.721	5.52551e-12	2.3037e-10
ENSMUSG00000025007.14	chr19	40538700	40576907	-	Aldh18a1	-0.432671	8.79003	220.778	5.73784e-12	2.38433e-10
ENSMUSG00000061477.5	chr12	28680852	28685952	-	Rps7	0.57558	8.49522	220.525	5.79641e-12	2.40074e-10
ENSMUSG00000081453.2	chr16	51182814	51184195	-	Gm6767	0.785376	5.21199	220.418	5.82129e-12	2.40086e-10
ENSMUSG00000036278.8	chr19	7034177	7175422	+	Macrod1	0.953399	4.3752	220.343	5.83876e-12	2.40086e-10
ENSMUSG00000023118.16	chr7	18758301	18788543	+	Sympk	0.474733	7.49871	220.279	5.8539e-12	2.40086e-10
ENSMUSG00000011179.9	chr12	17594794	17601506	+	Odc1	-0.627987	7.22606	219.852	5.95514e-12	2.43445e-10
ENSMUSG00000028464.17	chr4	43514710	43523765	-	Tpm2	0.47954	7.36282	218.873	6.19495e-12	2.52429e-10
ENSMUSG00000017929.14	chr2	167140363	167191103	-	B4galt5	-0.592952	6.2672	217.807	6.46813e-12	2.6271e-10
ENSMUSG00000074733.15	chr19	61042277	61129278	-	Zfp950	1.06083	5.0123	236.921	6.50956e-12	2.63543e-10
ENSMUSG00000023330.13	chr2	125994060	126007199	+	Dtwd1	-1.04001	3.93148	217.308	6.60055e-12	2.6637e-10
ENSMUSG00000030268.18	chr6	144939560	145021910	-	Bcat1	-0.501349	6.88827	217.108	6.65445e-12	2.67687e-10
ENSMUSG00000045827.11	chr13	33187232	33201940	+	Serpinb9	-1.09662	3.66131	216.931	6.70262e-12	2.68767e-10
ENSMUSG00000073530.12	chr1	158539296	158808060	-	Pappa2	-2.09414	1.84559	216.609	6.79118e-12	2.71453e-10
ENSMUSG00000058135.13	chr3	107919570	107925289	-	Gstm1	0.706484	5.41936	216.441	6.83781e-12	2.72452e-10
ENSMUSG00000064080.13	chr6	91189436	91249522	+	Fbln2	-0.505935	10.8406	215.983	6.96699e-12	2.76724e-10
ENSMUSG00000057113.14	chr11	33102286	33113206	-	Npm1	0.510081	9.34004	215.536	7.09562e-12	2.80946e-10
ENSMUSG00000064215.14	chr12	103400469	103406498	+	Ifi27	-0.774499	5.44426	214.495	7.40562e-12	2.92301e-10
ENSMUSG00000027951.17	chr3	89622328	89660753	+	Adar	-0.629486	6.45405	214.109	7.52436e-12	2.9606e-10
ENSMUSG00000071041.5	chr8	100757189	100758734	+	Impdh2-ps	0.779617	5.67225	214	7.55802e-12	2.96458e-10
ENSMUSG00000060938.15	chr11	68792408	68797815	+	Rpl26	0.562256	8.68324	213.762	7.63286e-12	2.98464e-10
ENSMUSG00000022982.11	chr16	90017641	90023217	+	Sod1	0.509356	7.13591	213.618	7.67827e-12	2.9931e-10
ENSMUSG00000026576.13	chr1	164264677	164285924	-	Atp1b1	-0.98782	4.39972	212.911	7.90616e-12	3.06867e-10
ENSMUSG00000068246.7	chr15	77613238	77620582	+	Apol9b	-3.04621	3.305	402.855	7.92088e-12	3.06867e-10
ENSMUSG00000021814.18	chr14	20505327	20530201	-	Anxa7	0.553109	7.24401	212.595	8.01038e-12	3.09383e-10
ENSMUSG00000031897.10	chr8	106662366	106665076	-	Psmb10	-1.05753	4.28866	212.385	8.08062e-12	3.11141e-10
ENSMUSG00000059195.11	chr4	103420598	103421726	+	Gm12715	0.411239	9.31002	212.291	8.11223e-12	3.11406e-10
ENSMUSG00000071172.14	chr17	29251601	29262347	+	Srsf3	0.418067	7.92488	212.216	8.13758e-12	3.11429e-10
ENSMUSG00000113061.2	chr13	28441510	28442117	+	Rps18-ps5	0.630383	6.56847	211.52	8.37664e-12	3.19607e-10
ENSMUSG00000027639.17	chr2	156939452	156977185	-	Samhd1	-0.509102	6.7938	210.956	8.57613e-12	3.25295e-10
ENSMUSG00000012848.16	chr7	12656216	12660613	+	Rps5	0.5288	9.33296	210.953	8.57739e-12	3.25295e-10
ENSMUSG00000041577.6	chr1	133838041	133849152	-	Prelp	-1.52698	3.0959	210.874	8.60557e-12	3.25383e-10
ENSMUSG00000078377.6	chr12	12073045	12073659	+	Gm4294	0.544318	6.84333	209.838	8.98755e-12	3.38117e-10
ENSMUSG00000002307.17	chr17	34128387	34134564	+	Daxx	-0.609328	5.67736	209.815	8.99605e-12	3.38117e-10
ENSMUSG00000097195.11	chr9	88377320	88405615	-	Snhg5	0.839015	5.00775	209.431	9.14265e-12	3.42604e-10
ENSMUSG00000034522.11	chr14	65595837	65636379	+	Zfp395	0.754857	5.12616	209.218	9.225e-12	3.44121e-10
ENSMUSG00000039070.6	chr6	30568367	30592417	+	Cpa4	-1.39857	3.74559	209.185	9.23777e-12	3.44121e-10
ENSMUSG00000003617.17	chr3	20011217	20063309	+	Cp	1.66759	2.1058	208.497	9.5097e-12	3.53205e-10
ENSMUSG00000087543.2	chr15	79626898	79641595	+	Gm16576	1.19777	3.46042	208.136	9.65573e-12	3.57574e-10
ENSMUSG00000062867.14	chr9	108437484	108442783	+	Impdh2	0.931209	6.66085	288.175	9.76802e-12	3.60672e-10
ENSMUSG00000037235.14	chr5	34331226	34345064	-	Mxd4	0.592703	6.70285	207.539	9.90338e-12	3.64601e-10
ENSMUSG00000035161.8	chr14	62913778	62998618	-	Ints6	0.591714	5.81291	207.231	1.00336e-11	3.67249e-10
ENSMUSG00000028194.16	chr3	145464429	145600032	+	Ddah1	-0.439465	7.32433	207.242	1.0029e-11	3.67249e-10
ENSMUSG00000056116.19	chr17	36348019	36353639	-	H2-T22	-0.700902	5.33958	207.023	1.01225e-11	3.69429e-10
ENSMUSG00000056758.15	chr10	120197179	120312374	-	Hmga2	-0.592349	7.47218	206.286	1.04456e-11	3.80116e-10
ENSMUSG00000048332.14	chr3	52948948	53169100	+	Lhfp	-0.502947	6.6971	206.131	1.05149e-11	3.81535e-10
ENSMUSG00000117438.2	chr17	82717363	82718248	-	Rpsa-ps7	0.615519	6.16162	205.427	1.08363e-11	3.92067e-10
ENSMUSG00000022844.9	chr16	35217681	35311243	-	Pdia5	-0.714694	5.87574	205.125	1.09774e-11	3.94906e-10
ENSMUSG00000024892.18	chr19	4560499	4671780	+	Pcx	-1.07266	3.8429	205.181	1.09507e-11	3.94906e-10
ENSMUSG00000001175.17	chr12	100165693	100176073	+	Calm1	-0.399992	8.08932	204.76	1.11504e-11	3.99649e-10
ENSMUSG00000057841.6	chr6	115782465	115785708	-	Rpl32	0.52818	9.36825	204.714	1.11728e-11	3.99649e-10
ENSMUSG00000021186.10	chr12	101712823	101785314	-	Fbln5	-0.407488	9.23232	204.035	1.15039e-11	4.10326e-10
ENSMUSG00000013033.17	chr8	84626733	84668583	+	Adgrl1	0.68278	5.72364	203.969	1.15365e-11	4.10326e-10
ENSMUSG00000041645.15	chr12	103374240	103392089	-	Ddx24	-0.466529	6.64034	203.854	1.1594e-11	4.11212e-10
ENSMUSG00000058799.17	chr10	111309083	111334011	+	Nap1l1	0.455081	8.93718	203.643	1.17001e-11	4.1381e-10
ENSMUSG00000066026.15	chr4	144619396	144654779	+	Dhrs3	-0.995335	4.58047	203.167	1.19429e-11	4.21214e-10
ENSMUSG00000072940.6	chr6	86311012	86311222	+	Gm10443	0.691413	7.01386	221.378	1.21988e-11	4.29036e-10
ENSMUSG00000040463.17	chr11	72332180	72342594	+	Mybbp1a	-0.413232	8.78231	201.532	1.2822e-11	4.497e-10
ENSMUSG00000031917.13	chr8	107783508	107787563	+	Nip7	-0.5164	6.24991	200.998	1.31243e-11	4.59024e-10
ENSMUSG00000020251.14	chr10	82486266	82526484	-	Glt8d2	1.20023	4.01964	200.851	1.32085e-11	4.60686e-10
ENSMUSG00000022270.17	chr15	25843265	25973773	+	Retreg1	-0.534599	6.1714	200.19	1.35968e-11	4.72921e-10
ENSMUSG00000030966.14	chr7	102207127	102214693	-	Trim21	-1.80385	2.10106	200.004	1.37078e-11	4.75467e-10
ENSMUSG00000078190.8	chr1	162045191	162053119	+	Dnm3os	0.613723	5.99458	199.841	1.38061e-11	4.77564e-10
ENSMUSG00000028207.19	chr4	9448068	9669344	-	Asph	-0.45547	7.02033	199.541	1.39899e-11	4.82593e-10
ENSMUSG00000041559.8	chr1	133964991	133976015	+	Fmod	-1.90931	5.97944	526.129	1.41171e-11	4.85652e-10
ENSMUSG00000025574.14	chr11	117706351	117716918	-	Tk1	-0.889635	5.52428	198.609	1.45763e-11	4.99421e-10
ENSMUSG00000063888.8	chr17	47084832	47093598	-	Rpl7l1	-0.464137	7.30349	198.577	1.45967e-11	4.99421e-10
ENSMUSG00000000567.6	chr11	112673049	112678586	+	Sox9	-0.879761	4.93311	198.501	1.46459e-11	4.99746e-10
ENSMUSG00000036036.16	chr17	37312054	37321527	+	Zfp57	0.541027	5.7725	198.248	1.48111e-11	5.04016e-10
ENSMUSG00000038279.11	chr6	125108871	125121716	+	Nop2	-0.432109	6.93024	198.021	1.49607e-11	5.07735e-10
ENSMUSG00000075602.11	chr15	74866725	74869880	-	Ly6a	-0.539571	7.68482	197.743	1.5146e-11	5.11343e-10
ENSMUSG00000060802.9	chr2	121978166	121983564	+	B2m	-0.480062	8.81994	197.74	1.51482e-11	5.11343e-10
ENSMUSG00000012405.17	chr14	4198304	4201873	+	Rpl15	0.488058	8.87367	197.551	1.52756e-11	5.14266e-10
ENSMUSG00000032487.9	chr1	149975781	149983978	+	Ptgs2	-0.692896	6.28195	203.469	1.53367e-11	5.14945e-10
ENSMUSG00000001305.6	chr1	186453174	186481555	-	Rrp15	-0.646935	4.87738	197.161	1.55422e-11	5.20457e-10
ENSMUSG00000057137.10	chr6	34840080	34851881	+	Tmem140	-1.31651	3.67653	196.61	1.59281e-11	5.31964e-10
ENSMUSG00000040111.18	chr9	40204528	40442679	-	Gramd1b	1.22407	3.34027	196.187	1.62321e-11	5.40683e-10
ENSMUSG00000028656.15	chr4	122752839	122779849	-	Cap1	0.407563	7.8254	194.359	1.76189e-11	5.85329e-10
ENSMUSG00000021963.18	chr14	58035636	58044095	+	Sap18	-0.546234	6.76709	194.264	1.76945e-11	5.86292e-10
ENSMUSG00000033763.15	chr8	111448107	111468032	+	Mtss2	-0.448998	8.27781	194.085	1.78383e-11	5.89505e-10
ENSMUSG00000007739.11	chr11	22940518	22953780	+	Cct4	0.45333	8.24944	193.487	1.83269e-11	6.02506e-10
ENSMUSG00000021756.13	chr13	112600603	112646620	+	Il6st	-0.574085	9.83715	199.996	1.83274e-11	6.02506e-10
ENSMUSG00000014782.17	chr8	106099905	106109494	+	Plekhg4	1.1521	4.04584	192.91	1.8812e-11	6.16827e-10
ENSMUSG00000105692.2	chr3	89117731	89120471	+	Gm43737	1.34516	3.24946	192.751	1.89483e-11	6.19683e-10
ENSMUSG00000052957.9	chr13	60322218	60325179	-	Gas1	-0.5918	8.46192	201.313	1.92016e-11	6.2634e-10
ENSMUSG00000060126.15	chr14	76082532	76085965	+	Tpt1	0.470123	10.1307	192.377	1.92733e-11	6.27055e-10
ENSMUSG00000027610.18	chr2	155405100	155434730	-	Gss	-0.719891	5.01053	192.281	1.93577e-11	6.28177e-10
ENSMUSG00000025150.11	chr11	120620314	120622940	-	Cbr2	0.717272	5.97447	191.942	1.96584e-11	6.36295e-10
ENSMUSG00000018848.5	chr11	35699207	35725333	-	Rars	-0.479103	7.46093	191.581	1.99851e-11	6.43562e-10
ENSMUSG00000071644.11	chr19	8944404	8955843	+	Eef1g	0.478953	9.1755	191.582	1.99838e-11	6.43562e-10
ENSMUSG00000095457.4	chr7	105922620	105929895	-	Gvin-ps5	-1.53732	2.02502	191.395	2.01549e-11	6.47375e-10
ENSMUSG00000037204.8	chr15	101182152	101188826	+	Atg101	-0.681935	5.3479	191.274	2.02669e-11	6.47768e-10
ENSMUSG00000032199.14	chr9	71385718	71393217	-	Polr2m	-0.40177	7.85957	191.271	2.02701e-11	6.47768e-10
ENSMUSG00000023988.9	chr17	47910255	47922417	-	Bysl	-0.793183	5.52164	193.365	2.03749e-11	6.49468e-10
ENSMUSG00000046330.11	chr1	72750448	72752972	+	Rpl37a	0.6901	6.70091	207.39	2.05412e-11	6.50509e-10
ENSMUSG00000081855.5	chr5	22817625	22818180	-	Rpl17-ps5	0.683945	6.31907	199.508	2.05476e-11	6.50509e-10
ENSMUSG00000051768.10	chr7	24245713	24272865	+	Xrcc1	0.657295	5.89673	190.958	2.05625e-11	6.50509e-10
ENSMUSG00000059714.14	chr17	36134121	36143683	+	Flot1	0.616515	5.69341	190.453	2.10436e-11	6.64059e-10
ENSMUSG00000024426.18	chr17	36208486	36220967	-	Atat1	0.705218	4.76351	190.104	2.13837e-11	6.73105e-10
ENSMUSG00000001962.9	chrX	73356638	73363755	+	Fam50a	0.466008	6.35185	190	2.14861e-11	6.74643e-10
ENSMUSG00000025402.13	chr10	127496786	127504437	-	Nab2	0.484787	6.988	189.344	2.21454e-11	6.93615e-10
ENSMUSG00000046447.4	chr4	138181624	138187434	+	Camk2n1	1.20002	2.91466	188.68	2.28362e-11	7.13477e-10
ENSMUSG00000000384.16	chr11	6565597	6576067	-	Tbrg4	-0.689896	5.64257	187.841	2.37426e-11	7.39957e-10
ENSMUSG00000060438.6	chr3	95529588	95530083	+	Rps10-ps1	0.700497	5.7287	187.612	2.39969e-11	7.46036e-10
ENSMUSG00000025034.10	chr19	46490140	46505287	+	Trim8	-0.496924	6.46923	187.547	2.40688e-11	7.4643e-10
ENSMUSG00000099764.2	chr16	20640894	20641390	-	Rps10-ps2	0.65351	7.10736	203.41	2.41814e-11	7.48078e-10
ENSMUSG00000060739.9	chr13	97265931	97274445	-	Nsa2	0.50397	7.13323	187.328	2.43154e-11	7.50379e-10
ENSMUSG00000034949.19	chr10	81068988	81087957	+	Zfr2	1.29878	3.39442	186.931	2.47702e-11	7.62545e-10
ENSMUSG00000029767.17	chr6	29348067	29377109	+	Calu	-0.358907	10.1865	186.833	2.4884e-11	7.64183e-10
ENSMUSG00000031299.11	chrX	158905204	158921409	-	Pdha1	0.403566	7.80424	186.567	2.51953e-11	7.71859e-10
ENSMUSG00000001380.8	chr18	36899580	36916258	-	Hars	-0.524125	6.27768	186.18	2.56558e-11	7.84059e-10
ENSMUSG00000104960.2	chr3	123301200	123302053	-	Snhg8	0.65166	5.40002	185.781	2.614e-11	7.96923e-10
ENSMUSG00000001016.13	chr3	90383432	90395686	+	Ilf2	-0.442873	6.86604	184.949	2.71837e-11	8.2674e-10
ENSMUSG00000035385.6	chr11	81926396	81928279	+	Ccl2	-0.599545	6.21718	184.634	2.75909e-11	8.37101e-10
ENSMUSG00000093798.3	chr10	14621105	14623046	-	Gm8355	0.606677	7.0144	187.776	2.81654e-11	8.52476e-10
ENSMUSG00000027962.15	chr3	115903597	115923337	-	Vcam1	-0.375107	7.67545	183.857	2.86238e-11	8.64273e-10
ENSMUSG00000060377.5	chr14	99231305	99231754	-	Rpl36a-ps1	0.817558	4.42451	183.648	2.89087e-11	8.70788e-10
ENSMUSG00000062006.13	chr3	130520479	130524047	-	Rpl34	0.570063	7.31548	183.452	2.91796e-11	8.76849e-10
ENSMUSG00000029614.14	chr5	121342543	121347304	+	Rpl6	0.41718	8.89883	183.117	2.96481e-11	8.88807e-10
ENSMUSG00000071415.7	chr11	97668352	97673263	-	Rpl23	0.528242	8.85695	183.114	2.98284e-11	8.92089e-10
ENSMUSG00000026880.12	chr2	35203997	35226988	-	Stom	-0.499055	6.32889	182.639	3.03305e-11	9.01929e-10
ENSMUSG00000083496.2	chr4	79245944	79246693	+	Gm11263	0.658202	4.94321	182.61	3.03723e-11	9.01929e-10
ENSMUSG00000059824.13	chr7	45354511	45359627	+	Dbp	0.989627	3.48933	182.666	3.02916e-11	9.01929e-10
ENSMUSG00000021950.16	chr14	33807937	33822528	+	Anxa8	-0.883582	4.32789	182.278	3.08577e-11	9.14185e-10
ENSMUSG00000063882.13	chr4	115924161	115932268	-	Uqcrh	0.729192	6.01136	191.115	3.09957e-11	9.16118e-10
ENSMUSG00000097745.2	chr3	152372549	152387069	+	AI115009	0.849926	4.00729	182.056	3.11866e-11	9.17455e-10
ENSMUSG00000030744.14	chr7	99127102	99132945	-	Rps3	0.533511	9.15734	183.455	3.1152e-11	9.17455e-10
ENSMUSG00000005357.10	chr10	78616329	78650599	+	Slc1a6	-0.749988	4.58208	181.351	3.2258e-11	9.46762e-10
ENSMUSG00000020863.16	chr11	94178715	94212814	-	Luc7l3	0.479495	6.90224	181.215	3.24699e-11	9.50764e-10
ENSMUSG00000005981.12	chr16	3857834	3895691	-	Trap1	-0.408262	6.71353	180.698	3.32875e-11	9.70192e-10
ENSMUSG00000068335.7	chr6	83007914	83010452	-	Dok1	-0.603444	5.93612	180.727	3.32398e-11	9.70192e-10
ENSMUSG00000027810.15	chr3	58433241	58464922	+	Eif2a	0.492765	6.41587	180.543	3.35359e-11	9.72771e-10
ENSMUSG00000068396.10	chr6	71101593	71101947	+	Rpl34-ps1	0.550341	7.06128	180.532	3.35535e-11	9.72771e-10
ENSMUSG00000031748.17	chr8	94536593	94696016	+	Gnao1	0.51612	5.80832	180.499	3.36078e-11	9.72771e-10
ENSMUSG00000032265.15	chr9	85202491	85209401	-	Tent5a	-0.706266	5.13542	179.458	3.53422e-11	1.02063e-09
ENSMUSG00000107383.2	chr7	116423744	116425086	-	Gm4366	0.458674	7.63288	178.947	3.6228e-11	1.04382e-09
ENSMUSG00000039137.19	chr4	63333146	63414228	-	Whrn	1.50905	2.09837	178.883	3.63411e-11	1.04468e-09
ENSMUSG00000074800.5	chr13	75793014	75793290	+	Gm4149	0.674879	6.11835	183.969	3.65327e-11	1.0478e-09
ENSMUSG00000081400.2	chr2	83183500	83184293	-	Gm13680	0.649117	4.82498	177.365	3.9135e-11	1.11988e-09
ENSMUSG00000028180.19	chr3	157239796	157254047	+	Zranb2	0.480639	7.01678	177.008	3.9825e-11	1.13705e-09
ENSMUSG00000016494.10	chr1	194621126	194643587	+	Cd34	-0.486702	6.3161	176.955	3.99284e-11	1.13742e-09
ENSMUSG00000083716.5	chr2	36697837	36698404	-	Gm13436	0.600653	6.14859	176.82	4.01937e-11	1.14239e-09
ENSMUSG00000027858.14	chr3	102641844	102708829	+	Tspan2	0.715669	4.80733	175.833	4.21967e-11	1.19662e-09
ENSMUSG00000028036.7	chr3	151502138	151543267	-	Ptgfr	-0.963479	4.77009	174.745	4.45299e-11	1.25995e-09
ENSMUSG00000060636.15	chr16	32876822	32880559	+	Rpl35a	0.496217	6.83083	174.221	4.57062e-11	1.28744e-09
ENSMUSG00000050578.11	chr9	7272513	7283331	+	Mmp13	-1.91385	2.6132	174.237	4.56696e-11	1.28744e-09
ENSMUSG00000038816.15	chr4	56810934	56865188	-	Ctnnal1	1.1428	3.76927	174.075	4.60399e-11	1.29107e-09
ENSMUSG00000030727.13	chr7	126027930	126048417	+	Rabep2	-0.720742	4.8086	174.114	4.59503e-11	1.29107e-09
ENSMUSG00000062458.6	chr8	48085363	48085799	-	Gm8623	0.701591	4.88302	173.725	4.68493e-11	1.31084e-09
ENSMUSG00000061232.17	chr17	34214990	34219321	-	H2-K1	-0.443493	7.64631	173.366	4.76983e-11	1.33164e-09
ENSMUSG00000026209.16	chr1	75284539	75294634	-	Dnpep	0.700146	4.93348	173.011	4.85524e-11	1.34855e-09
ENSMUSG00000098234.8	chr1	10012183	10014343	-	Snhg6	0.700606	5.1914	172.968	4.86563e-11	1.34855e-09
ENSMUSG00000022554.8	chr15	76253097	76255637	+	Hgh1	-0.679808	4.82127	172.937	4.87325e-11	1.34855e-09
ENSMUSG00000028885.9	chr4	132460276	132484563	-	Smpdl3b	-0.747196	4.56605	173.059	4.84367e-11	1.34855e-09
ENSMUSG00000022836.12	chr16	34565579	34822790	+	Mylk	-0.637491	5.80441	172.233	5.04864e-11	1.39265e-09
ENSMUSG00000061167.10	chr9	22096902	22097517	-	Rpl15-ps3	0.536873	7.57873	172.209	5.05475e-11	1.39265e-09
ENSMUSG00000113625.2	chr12	109860885	109861527	-	Gm3379	0.607462	6.25685	171.855	5.14555e-11	1.41458e-09
ENSMUSG00000022201.17	chr15	12117916	12185769	+	Zfr	-0.37352	7.71131	171.294	5.29327e-11	1.45202e-09
ENSMUSG00000022665.16	chr16	44913764	44948440	+	Ccdc80	-0.696304	9.16528	226.342	5.45762e-11	1.49385e-09
ENSMUSG00000004393.11	chr11	6208918	6217772	-	Ddx56	-0.540466	5.66987	170	5.6525e-11	1.54049e-09
ENSMUSG00000110218.2	chr17	56858413	56861387	-	Tincr	1.56941	1.7611	170	5.65241e-11	1.54049e-09
ENSMUSG00000012519.15	chr8	112038428	112064809	-	Mlkl	-0.862079	4.35502	169.699	5.73965e-11	1.56086e-09
ENSMUSG00000024130.17	chr17	24570923	24629175	+	Abca3	0.795423	4.39205	169.187	5.89159e-11	1.59873e-09
ENSMUSG00000034064.15	chr16	38345498	38370620	-	Poglut1	-0.433784	6.15696	168.901	5.97846e-11	1.61881e-09
ENSMUSG00000038668.15	chr4	58435254	58553898	-	Lpar1	-0.511915	5.7813	168.712	6.03659e-11	1.63105e-09
ENSMUSG00000098274.8	chr16	55786637	55791798	+	Rpl24	0.425131	8.08994	168.543	6.08911e-11	1.64171e-09
ENSMUSG00000018001.19	chr5	143608201	143696005	+	Cyth3	-0.464656	7.09652	168.258	6.17882e-11	1.66234e-09
ENSMUSG00000068758.9	chr14	8113751	8123488	-	Il3ra	0.97702	3.52691	167.798	6.32679e-11	1.69852e-09
ENSMUSG00000029769.17	chr6	29396307	29426993	+	Ccdc136	0.802831	5.10181	167.429	6.4482e-11	1.72596e-09
ENSMUSG00000033735.10	chr6	85107157	85114748	-	Spr	-0.627382	5.31927	167.405	6.45643e-11	1.72596e-09
ENSMUSG00000031066.11	chrX	20570144	20586778	+	Usp11	-0.615162	4.91801	166.976	6.60098e-11	1.76087e-09
ENSMUSG00000027593.16	chr2	154633015	154709181	+	Raly	0.399963	7.51428	166.733	6.68468e-11	1.77942e-09
ENSMUSG00000028081.7	chr3	86045246	86050009	-	Rps3a1	0.643272	9.05643	206.435	6.91537e-11	1.83695e-09
ENSMUSG00000027805.17	chr3	57749315	57755500	-	Pfn2	0.818866	4.14839	165.904	6.97844e-11	1.8498e-09
ENSMUSG00000010095.14	chr19	8684245	8700733	-	Slc3a2	-0.383058	9.03221	165.499	7.127e-11	1.88126e-09
ENSMUSG00000039982.9	chr19	12443701	12478818	-	Dtx4	-0.443975	6.16965	165.533	7.11473e-11	1.88126e-09
ENSMUSG00000039680.11	chr16	91855157	91909115	+	Mrps6	-0.55818	5.24864	165.339	7.18691e-11	1.8931e-09
ENSMUSG00000020358.18	chr11	51490926	51497674	-	Hnrnpab	-0.390832	9.0554	165.141	7.26152e-11	1.90759e-09
ENSMUSG00000025137.16	chr11	120500912	120508762	-	Pcyt2	-0.538673	6.32773	165.113	7.27221e-11	1.90759e-09
ENSMUSG00000083619.4	chr2	177152067	177152640	+	Gm14414	0.562617	5.3344	164.897	7.35468e-11	1.92521e-09
ENSMUSG00000083394.3	chr11	115615151	115615634	-	Gm11703	0.640518	4.78787	164.724	7.42168e-11	1.93872e-09
ENSMUSG00000067586.5	chr13	51562674	51576833	+	S1pr3	-1.0012	4.09878	164.305	7.58636e-11	1.97764e-09
ENSMUSG00000045193.14	chr10	80001818	80008620	+	Cirbp	0.807834	4.3722	164.032	7.69601e-11	2.00208e-09
ENSMUSG00000021701.9	chr13	110531579	110537378	+	Plk2	-0.349198	9.34641	163.989	7.71358e-11	2.00251e-09
ENSMUSG00000024659.16	chr19	20350791	20368308	-	Anxa1	0.394751	8.61474	163.58	7.88112e-11	2.04179e-09
ENSMUSG00000047215.15	chr5	65545706	65548787	-	Rpl9	0.557609	7.99074	174.201	7.99707e-11	2.06758e-09
ENSMUSG00000025579.15	chr11	119158712	119176280	+	Gaa	0.345371	8.1363	162.317	8.42564e-11	2.17392e-09
ENSMUSG00000070348.6	chr7	144483667	144493662	-	Ccnd1	-0.382412	9.40934	162.184	8.48519e-11	2.18481e-09
ENSMUSG00000024276.8	chr18	24087748	24097730	+	Zfp397	0.485818	5.82457	162.011	8.56362e-11	2.1985e-09
ENSMUSG00000038274.14	chr19	6107873	6109554	+	Fau	0.477978	8.2139	161.99	8.57329e-11	2.1985e-09
ENSMUSG00000000740.13	chr8	123829088	123831983	+	Rpl13	0.481302	9.17034	161.581	8.76188e-11	2.24229e-09
ENSMUSG00000046380.4	chr15	74574149	74581384	-	Jrk	-0.812373	3.93561	161.121	8.97936e-11	2.28865e-09
ENSMUSG00000057657.5	chr8	107989424	107989880	-	Rps18-ps3	0.604127	5.79313	161.143	8.96908e-11	2.28865e-09
ENSMUSG00000115317.2	chr15	32779049	32796152	+	Gm32618	1.15755	3.55801	160.8	9.13498e-11	2.32361e-09
ENSMUSG00000020137.6	chr10	115204308	115220348	-	Thap2	0.468986	5.99471	160.743	9.1626e-11	2.32593e-09
ENSMUSG00000030432.13	chr7	4795872	4798065	+	Rpl28	0.523261	8.24307	165.178	9.27724e-11	2.3503e-09
ENSMUSG00000042759.13	chr7	126184113	126188284	+	Apobr	1.43523	3.95371	206.912	9.35934e-11	2.36633e-09
ENSMUSG00000004098.8	chr9	20681345	20726363	-	Col5a3	-0.964827	7.64998	287.993	9.44448e-11	2.38307e-09
ENSMUSG00000040667.12	chr11	70833883	70860799	-	Nup88	0.458054	6.75114	160.064	9.50265e-11	2.39296e-09
ENSMUSG00000010067.14	chr9	107428753	107439466	+	Rassf1	-0.467062	6.06142	159.807	9.63505e-11	2.42146e-09
ENSMUSG00000062353.7	chr5	3286430	3286868	+	Gm15772	0.592513	5.9806	159.722	9.679e-11	2.42765e-09
ENSMUSG00000010362.10	chr11	101518020	101526926	+	Rdm1	1.45701	3.75143	159.458	9.81775e-11	2.44922e-09
ENSMUSG00000026726.11	chr2	13281148	13496624	-	Cubn	-1.31119	2.8742	159.519	9.78539e-11	2.44922e-09
ENSMUSG00000029817.12	chr6	49220857	49240967	-	Tra2a	0.419021	7.1284	159.447	9.82332e-11	2.44922e-09
ENSMUSG00000022421.21	chr15	79670551	79688967	-	Nptxr	0.512354	6.51946	159.237	9.93517e-11	2.47221e-09
ENSMUSG00000042901.11	chr1	183078133	183106331	+	Aida	-0.543053	5.77019	159.053	1.00348e-10	2.49207e-09
ENSMUSG00000005686.18	chr7	110367412	110411612	+	Ampd3	-0.608222	5.30694	158.661	1.02496e-10	2.5404e-09
ENSMUSG00000026932.15	chr2	25945546	26013232	-	Nacc2	0.615006	5.98266	158.553	1.03095e-10	2.55024e-09
ENSMUSG00000017404.13	chr11	97917535	97921318	+	Rpl19	0.449028	8.99182	156.711	1.13982e-10	2.81403e-09
ENSMUSG00000084319.4	chr6	99854776	99855295	-	Tpt1-ps3	0.468486	8.83775	156.619	1.14553e-10	2.82259e-09
ENSMUSG00000006219.13	chr4	141303372	141333407	-	Fblim1	0.614697	5.67279	156.222	1.17076e-10	2.8791e-09
ENSMUSG00000023087.16	chr3	51131867	51159065	+	Noct	-0.539797	6.03549	155.715	1.20387e-10	2.94902e-09
ENSMUSG00000031119.5	chrX	51141897	51254129	-	Gpc4	-0.378256	7.40374	155.734	1.2026e-10	2.94902e-09
ENSMUSG00000073423.11	chr17	33848063	33850753	+	Zfp414	0.864074	3.83983	155.408	1.22442e-10	2.98773e-09
ENSMUSG00000024999.8	chr19	38776571	38807681	-	Noc3l	-0.477511	6.17243	155.428	1.22304e-10	2.98773e-09
ENSMUSG00000028010.17	chr3	129618560	129625045	-	Gar1	-0.545414	5.28642	155.359	1.22774e-10	2.99004e-09
ENSMUSG00000036534.7	chr8	96562547	96580167	-	Slc38a7	-0.443674	6.64721	154.612	1.27953e-10	3.11015e-09
ENSMUSG00000068329.13	chr6	83028246	83032254	-	Htra2	-0.548469	6.24559	153.942	1.328e-10	3.22175e-09
ENSMUSG00000099980.2	chr9	85663920	85664680	-	Gm5619	0.517854	5.68648	153.895	1.33151e-10	3.22404e-09
ENSMUSG00000082926.4	chrX	68649101	68649851	-	Gm8172	0.64309	4.99533	153.516	1.35991e-10	3.2865e-09
ENSMUSG00000021102.5	chr12	104998946	105009165	+	Glrx5	-0.54562	5.79203	153.427	1.36668e-10	3.29653e-09
ENSMUSG00000026942.14	chr2	25407993	25436952	-	Traf2	-0.456095	5.95178	153.283	1.37768e-10	3.31671e-09
ENSMUSG00000062328.9	chr18	75131628	75136452	+	Rpl17	0.70462	4.9157	153.041	1.39645e-10	3.35548e-09
ENSMUSG00000053173.13	chr6	128290319	128290886	+	Rpl18-ps2	0.640077	4.31144	152.715	1.42218e-10	3.41079e-09
ENSMUSG00000023411.13	chr14	56060600	56071400	+	Nfatc4	0.495968	6.765	152.536	1.43653e-10	3.43866e-09
ENSMUSG00000030609.19	chr7	78545601	78560957	+	Aen	-0.48753	5.80532	152.211	1.46302e-10	3.49543e-09
ENSMUSG00000026826.14	chr2	56996841	57014015	-	Nr4a2	-0.930158	3.85895	152.003	1.48023e-10	3.52983e-09
ENSMUSG00000028364.16	chr4	63878021	63965252	-	Tnc	-0.443079	9.24715	151.536	1.5197e-10	3.61713e-09
ENSMUSG00000086513.4	chr7	105473429	105480722	-	Gvin-ps1	-1.45878	2.38696	151.267	1.54295e-10	3.66393e-09
ENSMUSG00000067147.8	chrX	165637206	165638007	+	Rpl7a-ps11	0.436099	7.49827	151.241	1.54519e-10	3.66393e-09
ENSMUSG00000015932.9	chr2	143757239	143785244	+	Dstn	0.372287	8.63092	151.176	1.5509e-10	3.67056e-09
ENSMUSG00000032295.16	chr9	57037973	57050006	+	Man2c1	0.668755	5.23479	151.074	1.55985e-10	3.68483e-09
ENSMUSG00000079641.4	chrX	36346172	36349055	-	Rpl39	0.712546	7.68118	206.465	1.56402e-10	3.68775e-09
ENSMUSG00000031740.9	chr8	93553918	93580048	+	Mmp2	-0.403361	8.75649	150.743	1.5894e-10	3.7406e-09
ENSMUSG00000024299.18	chr17	33743177	33772756	+	Adamts10	0.553777	5.51214	150.448	1.61625e-10	3.79669e-09
ENSMUSG00000062825.16	chr11	120236515	120239368	-	Actg1	0.401543	10.5539	150.178	1.6412e-10	3.84811e-09
ENSMUSG00000083596.5	chrX	149998162	149998645	-	Rpl21-ps15	0.594933	5.40491	150.006	1.65734e-10	3.87874e-09
ENSMUSG00000044763.9	chr16	55852971	55858182	-	Trmt10c	-0.599184	5.05064	149.906	1.66682e-10	3.89367e-09
ENSMUSG00000030978.11	chr7	102090901	102118978	+	Rrm1	-0.479236	7.19268	149.415	1.71417e-10	3.99687e-09
ENSMUSG00000030498.16	chr7	51511762	51644723	+	Gas2	-0.49135	7.09823	149.008	1.75463e-10	4.08365e-09
ENSMUSG00000031880.8	chr8	105354701	105357959	-	Rrad	-0.662973	4.87193	148.831	1.77245e-10	4.11752e-09
ENSMUSG00000099927.2	chr9	84306036	84306834	+	Gm8226	0.434851	7.47095	148.538	1.80252e-10	4.17967e-09
ENSMUSG00000005683.9	chr10	128173602	128198348	+	Cs	0.395493	8.5166	148.463	1.81034e-10	4.19007e-09
ENSMUSG00000048240.15	chr10	80784457	80850779	-	Gng7	1.04482	3.55722	148.343	1.82285e-10	4.20358e-09
ENSMUSG00000000078.8	chr13	5911480	5920393	+	Klf6	-0.348205	7.38744	148.367	1.82034e-10	4.20358e-09
ENSMUSG00000057751.15	chr4	154255186	154360170	+	Megf6	-1.09936	5.27991	174.481	1.86783e-10	4.29941e-09
ENSMUSG00000028248.16	chr4	21847582	21876475	+	Pnisr	0.494141	6.80152	147.721	1.88935e-10	4.34102e-09
ENSMUSG00000069117.5	chr13	97896579	97897140	-	Rps18-ps6	0.596508	5.94632	147.489	1.9149e-10	4.3917e-09
ENSMUSG00000019849.12	chr10	44943298	45043294	+	Prep	-0.349973	7.382	147.432	1.92119e-10	4.39812e-09
ENSMUSG00000026817.15	chr2	32511769	32525070	+	Ak1	0.768876	4.99403	147.226	1.94426e-10	4.44286e-09
ENSMUSG00000071708.12	chrX	156226850	156275283	-	Sms	0.498195	5.76979	147.157	1.95203e-10	4.45254e-09
ENSMUSG00000009772.16	chr1	132243863	132261226	+	Nuak2	-0.638832	4.59196	147.043	1.96491e-10	4.4738e-09
ENSMUSG00000017615.13	chr11	78413675	78427158	-	Tnfaip1	-0.391793	7.00709	146.662	2.00887e-10	4.56564e-09
ENSMUSG00000082575.2	chr4	142968593	142969938	-	Eef2-ps2	0.729159	4.82102	146.594	2.01683e-10	4.57548e-09
ENSMUSG00000029093.15	chr5	36174523	36555483	-	Sorcs2	0.395491	7.72167	146.181	2.06594e-10	4.67846e-09
ENSMUSG00000030695.17	chr7	126394405	126399923	-	Aldoa	0.516294	8.60918	155.983	2.07012e-10	4.67951e-09
ENSMUSG00000062456.5	chr19	32443264	32443978	-	Rpl9-ps6	0.568176	5.99655	145.915	2.09818e-10	4.73444e-09
ENSMUSG00000030515.10	chr7	65294645	65341839	+	Tarsl2	0.730276	4.48719	145.715	2.12283e-10	4.78148e-09
ENSMUSG00000003429.12	chr7	44771802	44773863	-	Rps11	0.4887	8.53484	149.278	2.15577e-10	4.84702e-09
ENSMUSG00000075232.7	chr10	40163453	40178184	-	Amd1	-0.405698	6.82876	144.837	2.23494e-10	5.01607e-09
ENSMUSG00000071532.7	chr10	14398821	14399289	+	Gm10335	0.435451	7.50075	144.551	2.27278e-10	5.08287e-09
ENSMUSG00000030220.14	chr6	136900652	136918897	-	Arhgdib	-0.782981	5.23311	148.372	2.26894e-10	5.08287e-09
ENSMUSG00000020451.18	chr11	3294255	3359189	-	Limk2	-0.497161	6.14064	144.034	2.34318e-10	5.23101e-09
ENSMUSG00000038900.18	chr2	32851570	32855357	+	Rpl12	0.474349	8.94618	145.132	2.38023e-10	5.30433e-09
ENSMUSG00000116835.2	chr16	33827212	33827827	-	Gm49594	0.504307	6.78849	143.029	2.48691e-10	5.53228e-09
ENSMUSG00000022614.9	chr15	89235206	89239862	-	Lmf2	-0.410031	7.03132	142.823	2.51758e-10	5.57288e-09
ENSMUSG00000027067.17	chr2	84867577	84877453	+	Ssrp1	-0.338038	8.10018	142.813	2.51901e-10	5.57288e-09
ENSMUSG00000031023.6	chr7	109302896	109311396	+	Akip1	-0.858075	3.48951	142.863	2.51154e-10	5.57288e-09
ENSMUSG00000045128.10	chr8	71347365	71350056	-	Rpl18a	0.513261	9.24436	153.42	2.52287e-10	5.57288e-09
ENSMUSG00000028634.18	chr4	119590980	119995242	+	Hivep3	-1.2729	4.24067	173.294	2.57014e-10	5.66736e-09
ENSMUSG00000068397.5	chr15	68181667	68182150	+	Gm10240	0.583846	5.30191	142.429	2.57724e-10	5.67308e-09
ENSMUSG00000035517.18	chr4	45965333	46034761	+	Tdrd7	-0.610886	5.08057	142.359	2.58811e-10	5.68707e-09
ENSMUSG00000024855.11	chr19	5183185	5323147	-	Pacs1	0.474075	6.22773	141.581	2.71138e-10	5.94756e-09
ENSMUSG00000007850.17	chr11	50267816	50277355	+	Hnrnph1	0.34778	8.50669	141.541	2.71787e-10	5.95143e-09
ENSMUSG00000006717.8	chr13	25001930	25015523	-	Acot13	0.627993	4.88798	141.443	2.73379e-10	5.9759e-09
ENSMUSG00000027822.17	chr3	63840927	63872189	-	Slc33a1	0.556858	5.20309	141.165	2.77987e-10	6.06609e-09
ENSMUSG00000030281.17	chr6	113448387	113460101	+	Il17rc	-0.422782	6.58991	141.01	2.80595e-10	6.11242e-09
ENSMUSG00000069188.6	chr2	4964355	4964563	-	Gm13192	0.837278	5.17032	153.94	2.81771e-10	6.12743e-09
ENSMUSG00000081094.5	chr8	19542951	19543542	+	Rpl19-ps11	0.43548	7.55376	140.702	2.85842e-10	6.19455e-09
ENSMUSG00000066443.6	chr9	88272889	88273370	+	Gm10163	0.583171	5.18817	140.708	2.85745e-10	6.19455e-09
ENSMUSG00000040888.11	chr17	24912160	24915130	-	Gfer	-0.598312	5.40937	140.542	2.88616e-10	6.24392e-09
ENSMUSG00000024210.4	chr17	27362938	27386769	-	Ip6k3	-1.18096	2.70597	140.357	2.91864e-10	6.30337e-09
ENSMUSG00000003269.18	chr7	45456060	45464005	-	Cyth2	0.490495	5.77605	140.288	2.93073e-10	6.31864e-09
ENSMUSG00000034245.11	chr6	91133646	91151674	+	Hdac11	0.883832	3.79534	140.055	2.97234e-10	6.39739e-09
ENSMUSG00000024732.8	chr19	10918844	10926630	-	Ccdc86	-0.515572	5.41514	139.975	2.98676e-10	6.41745e-09
ENSMUSG00000022037.16	chr14	66205931	66218996	+	Clu	-0.978199	3.76129	139.663	3.04378e-10	6.52882e-09
ENSMUSG00000054408.10	chr8	54973467	54983033	-	Spcs3	-0.380764	9.49269	139.607	3.05415e-10	6.53993e-09
ENSMUSG00000030774.14	chr7	97437747	97561588	+	Pak1	0.580992	5.82342	139.137	3.14274e-10	6.7182e-09
ENSMUSG00000028108.17	chr3	95641458	95646881	-	Ecm1	-0.44307	7.7682	138.994	3.17023e-10	6.76548e-09
ENSMUSG00000001123.16	chr11	78853799	78875772	-	Lgals9	-2.64301	2.92949	238.095	3.19374e-10	6.80412e-09
ENSMUSG00000028583.15	chr4	142994000	143026134	-	Pdpn	-0.627722	5.70353	138.71	3.22572e-10	6.86064e-09
ENSMUSG00000059182.9	chr6	51834401	51989529	-	Skap2	0.474404	5.92146	138.461	3.27515e-10	6.94231e-09
ENSMUSG00000031442.22	chr8	12923805	13070905	+	Mcf2l	1.1196	3.51546	138.483	3.27075e-10	6.94231e-09
ENSMUSG00000029304.15	chr5	104582983	104588916	+	Spp1	-0.480489	7.8534	138.362	3.29491e-10	6.96497e-09
ENSMUSG00000061787.16	chr7	80992479	80995002	-	Rps17	0.448567	8.43051	138.352	3.2969e-10	6.96497e-09
ENSMUSG00000081087.2	chr2	152027210	152027602	-	Rps15a-ps7	0.602378	4.72088	138.01	3.36673e-10	7.10058e-09
ENSMUSG00000034684.13	chr9	107558698	107587674	-	Sema3f	0.395828	7.05322	137.891	3.39145e-10	7.14077e-09
ENSMUSG00000107215.2	chr6	3336771	3339354	-	Gm43197	-1.34583	2.13496	137.687	3.43429e-10	7.2189e-09
ENSMUSG00000024587.11	chr18	64632717	64649723	-	Nars	-0.333394	9.24093	137.47	3.48043e-10	7.30368e-09
ENSMUSG00000032336.18	chr9	58489522	58565238	+	Nptn	0.35798	7.43723	137.077	3.56556e-10	7.46988e-09
ENSMUSG00000018476.8	chr11	69289333	69304501	-	Kdm6b	0.494081	6.74064	136.921	3.60012e-10	7.52974e-09
ENSMUSG00000036180.16	chr8	70359725	70449034	-	Gatad2a	-0.379242	7.18366	136.861	3.61356e-10	7.54533e-09
ENSMUSG00000023904.11	chr17	23892569	23894201	+	Hcfc1r1	-0.565801	6.14422	136.65	3.66082e-10	7.63136e-09
ENSMUSG00000024007.16	chr17	29469776	29483160	-	Ppil1	-0.518876	5.52234	136.451	3.70622e-10	7.71014e-09
ENSMUSG00000059430.15	chr6	83489886	83513247	-	Actg2	-1.72157	1.54149	136.431	3.71086e-10	7.71014e-09
ENSMUSG00000062093.6	chr14	90133663	90136883	-	Gm10110	0.529776	5.81932	136.358	3.72773e-10	7.73243e-09
ENSMUSG00000089764.3	chr17	26488310	26489358	+	Gm16580	0.585198	5.09859	136.203	3.76368e-10	7.79417e-09
ENSMUSG00000019467.16	chr10	127018393	127025952	-	Arhgef25	0.349547	7.58437	135.982	3.81561e-10	7.88872e-09
ENSMUSG00000029777.11	chr6	55014991	55056485	+	Gars	-0.316411	8.76378	135.915	3.83158e-10	7.90876e-09
ENSMUSG00000001552.15	chr11	100259783	100288589	-	Jup	0.636656	5.11947	135.778	3.8644e-10	7.9575e-09
ENSMUSG00000040152.9	chr2	117942356	117957614	+	Thbs1	-1.07314	11.9111	300.667	3.86783e-10	7.9575e-09
ENSMUSG00000116138.2	chr15	76605664	76608045	-	C030006K11Rik	-0.860593	3.81287	135.621	3.90245e-10	8.01562e-09
ENSMUSG00000026728.10	chr2	13578737	13587637	+	Vim	0.38954	10.5365	135.383	3.96067e-10	8.12195e-09
ENSMUSG00000036249.17	chr2	51814459	51825175	-	Rbm43	-0.901074	3.78984	135.25	3.9936e-10	8.17616e-09
ENSMUSG00000022837.15	chr16	36648746	36693083	+	Iqcb1	0.628181	4.5424	134.956	4.06779e-10	8.31453e-09
ENSMUSG00000032372.15	chr9	92157654	92179805	+	Plscr2	-0.628896	4.65845	134.866	4.09072e-10	8.34786e-09
ENSMUSG00000058603.11	chr1	127966305	127966719	+	Rpl28-ps1	0.513839	6.29806	134.731	4.12541e-10	8.40502e-09
ENSMUSG00000020307.16	chr10	79518028	79524232	+	Cdc34	-0.482141	6.47602	134.4	4.21188e-10	8.55352e-09
ENSMUSG00000022516.11	chr16	4756624	4758896	+	Nudt16l1	-0.665831	4.44817	134.405	4.21051e-10	8.55352e-09
ENSMUSG00000020935.9	chr11	102884872	102919159	-	Dcakd	-0.516812	5.6853	134.016	4.31483e-10	8.74848e-09
ENSMUSG00000005148.9	chr14	99536126	99552472	+	Klf5	-0.458259	5.94021	133.967	4.32812e-10	8.7613e-09
ENSMUSG00000026946.10	chr2	51838498	51863506	-	Nmi	-1.31021	2.47717	133.901	4.34629e-10	8.76293e-09
ENSMUSG00000084323.5	chr2	175112348	175112972	+	Gm14438	0.564044	4.93945	133.925	4.33967e-10	8.76293e-09
ENSMUSG00000097960.2	chr8	120931172	120954969	-	A330074K22Rik	1.20091	3.29318	133.888	4.3498e-10	8.76293e-09
ENSMUSG00000040652.17	chr9	65575282	65597582	+	Oaz2	0.41925	6.42489	133.473	4.46506e-10	8.98075e-09
ENSMUSG00000032518.7	chr9	119956754	119961435	+	Rpsa	0.561686	9.68515	159.134	4.56494e-10	9.16701e-09
ENSMUSG00000024012.19	chr17	29551045	29566908	-	Mtch1	0.352799	8.07587	133.065	4.58185e-10	9.18632e-09
ENSMUSG00000038213.8	chr6	125200895	125208823	-	Tapbpl	-0.668764	4.41517	132.993	4.60276e-10	9.21356e-09
ENSMUSG00000045092.9	chr3	115504081	115508721	-	S1pr1	-0.833903	3.98468	132.5	4.74894e-10	9.4911e-09
ENSMUSG00000053553.12	chr5	139345493	139446282	-	3110082I17Rik	-0.759246	4.19979	132.402	4.77884e-10	9.53572e-09
ENSMUSG00000061315.15	chr10	127871443	127884506	+	Naca	0.356812	8.82281	132.364	4.79024e-10	9.54333e-09
ENSMUSG00000081051.5	chr1	95426345	95426876	+	Gm15427	0.521155	8.08512	144.892	4.89335e-10	9.73335e-09
ENSMUSG00000028693.16	chr4	116458248	116485138	-	Nasp	-0.436473	6.11438	131.818	4.96013e-10	9.85063e-09
ENSMUSG00000021367.9	chr13	42454951	42461466	+	Edn1	-0.984644	3.16665	131.708	4.99481e-10	9.90388e-09
ENSMUSG00000027722.15	chr3	37474044	37633245	+	Spata5	-0.540628	5.70794	131.611	5.02616e-10	9.94082e-09
ENSMUSG00000023106.16	chr5	124045237	124066898	+	Denr	-0.415646	6.71459	131.601	5.02923e-10	9.94082e-09
ENSMUSG00000094989.2	chr13	72602880	72603459	-	Rpl9-ps4	0.650538	5.38058	131.177	5.16774e-10	1.01986e-08
ENSMUSG00000038780.15	chr5	144813304	144902657	-	Smurf1	-0.434112	6.82932	130.863	5.27298e-10	1.03738e-08
ENSMUSG00000038503.16	chr7	83533673	83550740	+	Mesd	-0.370467	6.72491	130.866	5.27185e-10	1.03738e-08
ENSMUSG00000021134.18	chr12	80992277	80997281	+	Srsf5	0.343684	8.05664	130.827	5.28497e-10	1.03811e-08
ENSMUSG00000022996.16	chr15	98668592	98676031	-	Wnt10b	0.573758	5.76129	130.764	5.3064e-10	1.0407e-08
ENSMUSG00000063015.13	chr5	93329791	93354354	-	Ccni	0.354995	7.83308	130.697	5.32931e-10	1.04357e-08
ENSMUSG00000022698.18	chr16	43960192	43983729	+	Naa50	-0.409203	7.32611	130.629	5.35291e-10	1.04656e-08
ENSMUSG00000027684.17	chr3	30005444	30602157	-	Mecom	-0.401345	6.64938	130.473	5.40706e-10	1.05551e-08
ENSMUSG00000025492.7	chr7	140589498	140590683	-	Ifitm3	-0.509931	8.19973	141.838	5.46727e-10	1.06561e-08
ENSMUSG00000084383.2	chr2	24875995	24876478	+	Gm13370	0.581385	5.02797	130.166	5.51502e-10	1.07326e-08
ENSMUSG00000019194.16	chr7	30815948	30826428	-	Scn1b	1.11995	3.24972	129.907	5.60825e-10	1.08971e-08
ENSMUSG00000028949.14	chr5	24795815	24829409	-	Smarcd3	0.635798	4.69031	129.858	5.62598e-10	1.09147e-08
ENSMUSG00000001289.13	chr15	102234550	102240308	+	Pfdn5	0.465118	6.70184	129.654	5.70071e-10	1.10427e-08
ENSMUSG00000030218.3	chr6	136849432	136852821	-	Mgp	-0.625901	8.73412	172.384	5.80086e-10	1.12194e-08
ENSMUSG00000001891.17	chr11	21271137	21321201	-	Ugp2	0.470702	6.24929	129.32	5.82545e-10	1.12497e-08
ENSMUSG00000020994.6	chr12	59113669	59120784	+	Pnn	0.523901	6.55007	128.916	5.9806e-10	1.15317e-08
ENSMUSG00000061904.13	chr10	90952435	90959921	-	Slc25a3	0.304326	8.81845	128.437	6.17034e-10	1.18793e-08
ENSMUSG00000052681.9	chr10	117649775	117681940	-	Rap1b	-0.332745	7.6286	128.411	6.18112e-10	1.18819e-08
ENSMUSG00000010048.11	chr9	107464840	107470584	+	Ifrd2	-0.560064	5.43174	128.318	6.21863e-10	1.19358e-08
ENSMUSG00000030264.15	chr6	113023185	113045234	+	Thumpd3	-0.458547	5.65407	128.234	6.25278e-10	1.19831e-08
ENSMUSG00000018509.9	chr11	62415771	62430087	-	Cenpv	0.790544	4.0027	128.083	6.31497e-10	1.20766e-08
ENSMUSG00000041594.19	chr14	123156382	123221447	-	Tmtc4	0.734606	4.49934	128.069	6.32077e-10	1.20766e-08
ENSMUSG00000018042.19	chr15	83037694	83056793	-	Cyb5r3	-0.301785	8.88276	128.034	6.33529e-10	1.2086e-08
ENSMUSG00000049295.18	chr14	52243533	52258190	-	Zfp219	0.552153	5.27594	127.911	6.38673e-10	1.21657e-08
ENSMUSG00000006456.11	chr19	4850596	4861662	-	Rbm14	0.6139	5.83917	129.963	6.52536e-10	1.2411e-08
ENSMUSG00000038388.15	chr6	50087220	50175919	+	Mpp6	-0.442766	5.8416	127.492	6.56452e-10	1.24666e-08
ENSMUSG00000035373.3	chr11	81936537	81938351	+	Ccl7	-1.04746	5.7503	215.21	6.5858e-10	1.24694e-08
ENSMUSG00000033065.15	chr15	97990469	98030332	+	Pfkm	0.418306	6.27786	127.465	6.57647e-10	1.24694e-08
ENSMUSG00000043716.14	chr1	16171518	16174886	-	Rpl7	0.430535	9.00624	127.418	6.59667e-10	1.24713e-08
ENSMUSG00000001119.8	chr10	76544625	76562002	-	Col6a1	-0.319106	11.0937	126.817	6.86326e-10	1.29404e-08
ENSMUSG00000071547.5	chr14	30853009	30861081	+	Nt5dc2	-0.580072	6.57594	135.661	6.86535e-10	1.29404e-08
ENSMUSG00000032067.7	chr9	50432916	50440024	-	Pts	0.87118	3.4625	126.774	6.88311e-10	1.29544e-08
ENSMUSG00000028234.7	chr4	3831333	3835665	-	Rps20	0.432803	8.84016	126.658	6.93588e-10	1.30343e-08
ENSMUSG00000031453.17	chr8	13616947	13727603	-	Rasa3	-0.364647	6.89083	126.412	7.04958e-10	1.32282e-08
ENSMUSG00000078771.11	chr11	79417385	79421435	-	Evi2a	-0.572643	5.7139	126.272	7.11539e-10	1.33318e-08
ENSMUSG00000018574.15	chr11	69901008	69906237	-	Acadvl	0.413203	6.22738	126.132	7.18169e-10	1.34361e-08
ENSMUSG00000089682.11	chr14	55120833	55125691	+	Bcl2l2	0.659123	5.36746	125.955	7.2666e-10	1.356e-08
ENSMUSG00000027981.15	chr3	113398715	113423798	-	Rnpc3	0.658487	4.49817	125.949	7.2695e-10	1.356e-08
ENSMUSG00000067931.7	chr17	21787269	21808961	+	Zfp948	-0.475462	5.60251	125.717	7.3828e-10	1.3751e-08
ENSMUSG00000037275.15	chr11	58010827	58059365	-	Gemin5	-0.433094	6.505	125.479	7.50061e-10	1.39292e-08
ENSMUSG00000024793.15	chr4	152200390	152204576	+	Tnfrsf25	1.55316	3.74729	161.878	7.49269e-10	1.39292e-08
ENSMUSG00000016256.11	chr2	174269285	174280832	-	Ctsz	-0.407594	7.27651	125.382	7.54957e-10	1.39995e-08
ENSMUSG00000020089.9	chr10	61484330	61509947	+	Ppa1	-0.438826	6.38951	125.229	7.6271e-10	1.41225e-08
ENSMUSG00000031077.8	chr7	144131054	144136200	-	Fadd	-0.706512	3.7707	125.155	7.66466e-10	1.41712e-08
ENSMUSG00000053470.14	chr6	71565955	71609974	-	Kdm3a	0.359406	6.35867	124.849	7.82317e-10	1.44275e-08
ENSMUSG00000001964.15	chrX	73298292	73305154	+	Emd	0.434631	6.17571	124.843	7.82623e-10	1.44275e-08
ENSMUSG00000033467.13	chr5	109702574	109706859	-	Crlf2	1.06523	2.60756	124.804	7.84701e-10	1.44447e-08
ENSMUSG00000081559.4	chr4	45550016	45550499	+	Gm12411	0.659277	4.40754	124.763	7.86849e-10	1.44631e-08
ENSMUSG00000018899.18	chr11	53660840	53669200	+	Irf1	-0.542363	5.55076	124.602	7.9536e-10	1.45982e-08
ENSMUSG00000030641.11	chr7	92506732	92523455	-	Ddias	-0.989807	3.61568	124.427	8.04774e-10	1.47495e-08
ENSMUSG00000097789.3	chr7	84178161	84232739	+	Gm2115	-0.606203	5.19529	124.226	8.15757e-10	1.49064e-08
ENSMUSG00000032803.16	chr9	103230292	103243039	-	Cdv3	-0.327428	7.68217	124.205	8.16888e-10	1.49064e-08
ENSMUSG00000036986.17	chr9	58125358	58157069	-	Pml	-0.509541	5.92097	124.212	8.1651e-10	1.49064e-08
ENSMUSG00000057262.3	chr15	52341012	52341624	-	Rpl15-ps6	0.531807	6.21143	124.277	8.21148e-10	1.49193e-08
ENSMUSG00000028426.11	chr4	55350042	55392237	+	Rad23b	-0.329341	8.50971	124.152	8.19781e-10	1.49193e-08
ENSMUSG00000066278.7	chr5	124142703	124170333	-	Vps37b	-0.466426	5.56739	124.13	8.21003e-10	1.49193e-08
ENSMUSG00000020886.18	chr11	69907767	69938348	+	Dlg4	0.476883	5.72465	123.914	8.33063e-10	1.5114e-08
ENSMUSG00000021500.18	chr13	55782839	55829069	+	Ddx46	0.471895	6.4454	123.735	8.43181e-10	1.52755e-08
ENSMUSG00000032925.17	chr14	123897382	124213030	+	Itgbl1	-1.25147	5.20634	207.78	8.46836e-10	1.52977e-08
ENSMUSG00000046733.8	chr6	135042648	135061707	+	Gprc5a	-0.480376	5.48941	123.675	8.46592e-10	1.52977e-08
ENSMUSG00000060198.8	chr13	26676536	26677163	+	Gm11353	0.514511	6.43995	123.868	8.6267e-10	1.55614e-08
ENSMUSG00000083011.2	chr4	112812271	112813483	-	Gm12816	0.774576	3.72338	123.117	8.79182e-10	1.58366e-08
ENSMUSG00000014077.14	chr2	119378177	119417508	+	Chp1	0.405271	6.5101	123.09	8.80784e-10	1.58428e-08
ENSMUSG00000039191.13	chr5	53623493	53814704	+	Rbpj	-0.409603	7.55937	123.002	8.8603e-10	1.58917e-08
ENSMUSG00000025262.9	chrX	150127170	150254838	+	Fam120c	0.806232	4.14057	123.008	8.85695e-10	1.58917e-08
ENSMUSG00000027580.18	chr2	180869407	180883820	-	Helz2	-1.15325	5.73541	236.555	8.93184e-10	1.59519e-08
ENSMUSG00000029004.16	chr5	23639438	23709233	+	Kmt2e	0.406675	6.56585	122.908	8.91703e-10	1.59519e-08
ENSMUSG00000051855.16	chr6	30723545	30748464	+	Mest	-1.46515	2.79642	122.886	8.93051e-10	1.59519e-08
ENSMUSG00000037692.15	chr4	132738570	132805421	+	Ahdc1	0.505	5.94863	122.841	8.95762e-10	1.59753e-08
ENSMUSG00000107951.2	chr6	75273100	75275042	-	Gm6210	0.643602	5.59592	127.583	9.06647e-10	1.61465e-08
ENSMUSG00000029659.17	chr5	149335213	149355188	+	Medag	-0.480364	5.73631	122.634	9.08507e-10	1.61568e-08
ENSMUSG00000042626.14	chr3	89325749	89337334	+	Shc1	0.38557	7.52207	122.6	9.10609e-10	1.61713e-08
ENSMUSG00000019362.9	chr8	84972866	84976348	-	D8Ertd738e	-0.424028	6.41741	122.5	9.16801e-10	1.62584e-08
ENSMUSG00000061024.9	chr1	9615632	9617680	+	Rrs1	-0.449888	6.20186	122.252	9.32434e-10	1.65123e-08
ENSMUSG00000021686.7	chr13	94495467	94702825	+	Ap3b1	0.471878	6.52978	122.166	9.37913e-10	1.6586e-08
ENSMUSG00000052369.9	chr15	97862080	97868156	+	Tmem106c	0.562524	4.85077	122.092	9.4266e-10	1.66233e-08
ENSMUSG00000082895.2	chr2	28367177	28368062	+	Rpsa-ps9	0.629292	5.6254	126.478	9.42098e-10	1.66233e-08
ENSMUSG00000020572.9	chr12	32869543	32903348	+	Nampt	-0.392324	6.15216	121.734	9.66033e-10	1.70116e-08
ENSMUSG00000078126.5	chr14	33892611	33893079	+	Rpl23a-ps3	0.440206	7.70022	121.713	9.67436e-10	1.70126e-08
ENSMUSG00000019055.16	chr4	147994209	148021224	-	Plod1	-0.353519	6.68949	121.477	9.83225e-10	1.72661e-08
ENSMUSG00000052337.16	chr6	71808314	71854372	+	Immt	-0.334448	7.50159	121.341	9.92415e-10	1.74032e-08
ENSMUSG00000059776.8	chr3	58894590	58895226	+	Rpl13-ps6	0.533535	6.8654	129.616	9.94248e-10	1.74111e-08
ENSMUSG00000023249.16	chr9	106347520	106354148	-	Parp3	-0.391136	6.88413	121.23	1.00002e-09	1.74879e-08
ENSMUSG00000021771.15	chr14	21875305	21895947	+	Vdac2	0.408119	7.46485	121.009	1.01533e-09	1.7731e-08
ENSMUSG00000027170.13	chr2	104830000	104847425	-	Eif3m	0.399833	6.65241	120.725	1.03539e-09	1.80563e-08
ENSMUSG00000027469.17	chr2	152689883	152737241	+	Tpx2	-0.5432	7.7178	136.912	1.05127e-09	1.83079e-08
ENSMUSG00000040473.16	chr5	5629277	5714239	-	Cfap69	0.908835	3.06613	120.439	1.05605e-09	1.83656e-08
ENSMUSG00000030862.14	chr7	131634415	131756468	-	Cpxm2	-0.927708	3.181	120.416	1.05774e-09	1.83697e-08
ENSMUSG00000024097.12	chr17	80507508	80514736	-	Srsf7	0.381035	7.43172	120.307	1.06574e-09	1.84831e-08
ENSMUSG00000021614.17	chr13	89803430	89890628	-	Vcan	-0.631349	4.985	120.269	1.06848e-09	1.85051e-08
ENSMUSG00000028741.14	chr4	139074745	139079887	-	Mrto4	-0.54731	5.70567	120.155	1.07701e-09	1.86273e-08
ENSMUSG00000022010.20	chr14	76652400	76745205	+	Tsc22d1	-0.324889	8.41599	120.017	1.08733e-09	1.878e-08
ENSMUSG00000001909.17	chr8	85412935	85426437	+	Trmt1	0.344526	7.07861	119.9	1.09619e-09	1.88811e-08
ENSMUSG00000032393.16	chr9	64939695	64989933	+	Dpp8	0.417701	7.0599	119.915	1.09504e-09	1.88811e-08
ENSMUSG00000054545.18	chr1	88062530	88146719	+	Ugt1a6a	1.08751	3.20805	119.81	1.10302e-09	1.89729e-08
ENSMUSG00000039615.10	chr17	26049478	26052378	-	Stub1	-0.381595	7.0857	119.544	1.12362e-09	1.93008e-08
ENSMUSG00000029701.16	chr6	29123574	29165005	-	Rbm28	-0.368216	6.79304	119.508	1.12648e-09	1.93237e-08
ENSMUSG00000027698.15	chr3	27237113	27338757	+	Nceh1	-0.55997	5.29522	119.326	1.1408e-09	1.95426e-08
ENSMUSG00000030315.16	chr6	114837588	114946955	-	Vgll4	0.438606	5.76289	119.248	1.14702e-09	1.96224e-08
ENSMUSG00000039485.9	chr10	34173437	34177316	+	Tspyl4	-0.455787	5.58847	119.209	1.15012e-09	1.96488e-08
ENSMUSG00000071984.12	chr17	7957400	8046134	-	Fndc1	-1.53326	6.11753	316.424	1.16274e-09	1.98375e-08
ENSMUSG00000062758.7	chr7	131215916	131216717	-	Gm16477	0.432529	6.21901	118.729	1.18935e-09	2.0264e-08
ENSMUSG00000035783.10	chr19	34218489	34232990	-	Acta2	0.347526	11.2534	118.306	1.22518e-09	2.08463e-08
ENSMUSG00000066362.6	chr8	87774316	87774854	+	Rps13-ps1	0.530168	6.2702	121.076	1.2278e-09	2.08626e-08
ENSMUSG00000001017.16	chr3	90406262	90416805	-	Chtop	-0.338912	7.2626	118.001	1.25168e-09	2.12112e-08
ENSMUSG00000038393.15	chr3	96465272	96469199	+	Txnip	0.620257	8.1346	158.806	1.25034e-09	2.12112e-08
ENSMUSG00000053581.14	chr5	139456965	139470304	-	Zfand2a	-0.559854	5.37134	117.907	1.26001e-09	2.13237e-08
ENSMUSG00000034161.9	chr15	76341651	76343658	+	Scx	0.482884	6.68103	117.743	1.27462e-09	2.15419e-08
ENSMUSG00000031295.14	chrX	159285161	159381874	+	Phka2	0.484908	5.48134	117.668	1.2814e-09	2.16275e-08
ENSMUSG00000027894.15	chr3	107374858	107425334	-	Slc6a17	1.49424	2.00808	117.46	1.30034e-09	2.19177e-08
ENSMUSG00000059901.13	chr10	61032890	61109217	-	Adamts14	1.1121	3.08522	117.396	1.30626e-09	2.19881e-08
ENSMUSG00000018932.10	chr11	60822858	60843637	+	Map2k3	-0.38852	6.49958	117.103	1.33356e-09	2.24177e-08
ENSMUSG00000020918.15	chr11	100595571	100603291	-	Kat2a	-0.417685	6.3808	117.044	1.33919e-09	2.24823e-08
ENSMUSG00000020894.17	chr11	68979315	68983210	+	Vamp2	0.456249	5.38377	117.002	1.34313e-09	2.25185e-08
ENSMUSG00000028614.15	chr4	107224980	107273543	+	Ndc1	-0.435499	6.08465	116.934	1.34968e-09	2.257e-08
ENSMUSG00000053801.19	chr7	45474646	45480368	-	Grwd1	-0.52818	5.1745	116.933	1.34979e-09	2.257e-08
ENSMUSG00000034259.9	chr15	76211596	76214877	+	Exosc4	-0.589021	5.2276	116.584	1.38356e-09	2.3104e-08
ENSMUSG00000067870.6	chr15	90648481	90648859	-	Rpl31-ps8	0.670409	6.55444	152.375	1.39291e-09	2.31986e-08
ENSMUSG00000061104.6	chr8	96551973	96552762	+	Sap18b	-0.504529	5.71717	116.502	1.39171e-09	2.31986e-08
ENSMUSG00000036206.13	chr1	88998136	89082790	+	Sh3bp4	-0.347509	6.66942	116.429	1.39895e-09	2.32683e-08
ENSMUSG00000039501.15	chr2	166877712	166904935	-	Znfx1	-0.681939	5.23364	116.921	1.41134e-09	2.34046e-08
ENSMUSG00000028469.16	chr4	43631934	43651244	+	Npr2	0.39089	6.65914	116.314	1.41045e-09	2.34046e-08
ENSMUSG00000036427.6	chr7	33900754	33929761	-	Gpi1	0.392469	7.84524	116.291	1.41272e-09	2.34046e-08
ENSMUSG00000106734.4	chr6	3333193	3346128	-	Gm20559	-0.821871	3.60263	115.552	1.48937e-09	2.46422e-08
ENSMUSG00000023010.16	chr15	99290762	99307930	+	Tmbim6	-0.299944	8.88579	115.52	1.49277e-09	2.4666e-08
ENSMUSG00000058440.15	chr6	30047986	30153457	+	Nrf1	-0.484011	5.21313	115.284	1.5183e-09	2.50549e-08
ENSMUSG00000024066.10	chr17	74190889	74257191	-	Xdh	-1.27911	2.73117	115.262	1.52066e-09	2.50611e-08
ENSMUSG00000005732.15	chr16	18057647	18066596	-	Ranbp1	-0.354905	7.11349	115.169	1.53084e-09	2.51958e-08
ENSMUSG00000013701.14	chr14	31902118	31923855	-	Timm23	-0.487411	5.59571	115.145	1.53348e-09	2.52064e-08
ENSMUSG00000056851.15	chr15	102378973	102408496	+	Pcbp2	0.289748	9.45996	115.086	1.54e-09	2.52805e-08
ENSMUSG00000030029.15	chr6	94581509	94677139	-	Lrig1	-0.568299	5.69385	114.929	1.55752e-09	2.55027e-08
ENSMUSG00000030560.18	chr7	87927292	87960096	+	Ctsc	-0.773844	3.90648	114.91	1.55961e-09	2.55027e-08
ENSMUSG00000015291.11	chrX	73348603	73355468	+	Gdi1	0.319785	7.19696	114.928	1.55761e-09	2.55027e-08
ENSMUSG00000036882.8	chr7	30221650	30234485	-	Arhgap33	-0.570361	5.27882	114.846	1.56676e-09	2.55864e-08
ENSMUSG00000079018.11	chr15	74915866	74920679	-	Ly6c1	-0.485572	6.51992	114.807	1.57121e-09	2.56258e-08
ENSMUSG00000057182.16	chr2	65287461	65397971	-	Scn3a	0.628276	6.25637	136.284	1.58261e-09	2.57784e-08
ENSMUSG00000074794.11	chr13	81031502	81044161	+	Arrdc3	-0.769062	4.78039	114.526	1.60338e-09	2.6083e-08
ENSMUSG00000018433.15	chr11	107057488	107080207	-	Nol11	-0.399063	5.83514	114.506	1.60574e-09	2.60877e-08
ENSMUSG00000071477.11	chr6	48001121	48025845	-	Zfp777	-0.43261	5.48821	114.48	1.60873e-09	2.61025e-08
ENSMUSG00000029994.18	chr6	86713821	86770566	-	Anxa4	0.442838	7.05005	114.268	1.63354e-09	2.64709e-08
ENSMUSG00000064281.8	chr1	84989834	84990425	+	Rpl19-ps1	0.423283	6.02459	114.11	1.65231e-09	2.67406e-08
ENSMUSG00000022369.14	chr15	55420803	55489819	+	Mtbp	-0.389794	6.23571	113.881	1.68001e-09	2.71541e-08
ENSMUSG00000081603.2	chrX	65822047	65822458	-	Gm14681	0.50874	5.78229	113.824	1.68693e-09	2.72309e-08
ENSMUSG00000062797.15	chr7	89566736	89590412	-	Hikeshi	-0.671906	4.25566	113.778	1.6926e-09	2.72875e-08
ENSMUSG00000025508.14	chr7	141027282	141031498	+	Rplp2	0.441745	8.1253	116.451	1.72184e-09	2.77234e-08
ENSMUSG00000002731.7	chr2	76460241	76478359	-	Prkra	0.624797	4.47293	113.455	1.73276e-09	2.78636e-08
ENSMUSG00000018821.4	chr19	42111711	42117498	-	Avpi1	-0.468893	5.98179	113.256	1.75812e-09	2.82353e-08
ENSMUSG00000022893.15	chr16	85590714	85600001	-	Adamts1	-0.624291	4.98741	113.189	1.76678e-09	2.83382e-08
ENSMUSG00000066180.6	chr7	125898605	125899088	-	Gm10155	0.614816	4.40798	113.155	1.77113e-09	2.83718e-08
ENSMUSG00000001819.5	chr2	74498653	74501943	+	Hoxd13	-0.370279	6.65001	112.988	1.7928e-09	2.86826e-08
ENSMUSG00000007589.10	chr14	55912145	55919277	-	Tinf2	-0.580992	5.16088	112.942	1.79884e-09	2.87353e-08
ENSMUSG00000030089.16	chr6	90581706	90623394	+	Slc41a3	0.919722	2.90268	112.928	1.80066e-09	2.87353e-08
ENSMUSG00000039356.16	chr2	31560726	31571361	+	Exosc2	-0.459076	5.68474	112.875	1.80774e-09	2.88117e-08
ENSMUSG00000028790.14	chr4	129596956	129636096	-	Khdrbs1	0.364766	7.53796	112.773	1.82121e-09	2.89897e-08
ENSMUSG00000022752.10	chr16	56942065	56977068	+	Tomm70a	-0.348321	7.65248	112.698	1.83122e-09	2.90915e-08
ENSMUSG00000068566.14	chr7	3337604	3348958	+	Myadm	0.30318	7.71272	112.691	1.83222e-09	2.90915e-08
ENSMUSG00000027293.14	chr2	119919655	119985087	-	Ehd4	-0.603116	5.09123	112.623	1.84135e-09	2.91995e-08
ENSMUSG00000083481.5	chr2	175596775	175597399	-	Rps8-ps2	0.581011	4.3367	112.506	1.85714e-09	2.93759e-08
ENSMUSG00000031403.15	chrX	74139459	74153383	+	Dkc1	-0.334237	6.62001	112.517	1.85573e-09	2.93759e-08
ENSMUSG00000042520.17	chr3	89907446	89959935	-	Ubap2l	0.312859	8.10454	112.233	1.89472e-09	2.99327e-08
ENSMUSG00000026207.17	chr1	75351940	75408964	+	Speg	0.355202	6.41337	112.201	1.89921e-09	2.99661e-08
ENSMUSG00000021262.16	chr12	108520978	108654775	+	Evl	0.512956	5.58246	112.062	1.91869e-09	3.02356e-08
ENSMUSG00000070692.7	chr2	122050473	122050872	+	Rps12-ps10	0.928711	3.25138	111.944	1.93552e-09	3.04626e-08
ENSMUSG00000093904.3	chr8	127657416	127672594	-	Tomm20	0.319239	7.61403	111.914	1.93972e-09	3.04906e-08
ENSMUSG00000035683.14	chr4	44300875	44364675	+	Melk	-0.675205	4.55844	111.713	1.9687e-09	3.08829e-08
ENSMUSG00000010755.18	chr7	143110966	143153827	-	Cars	-0.318174	7.66036	111.707	1.96958e-09	3.08829e-08
ENSMUSG00000024613.17	chr18	60946826	60982043	-	Tcof1	-0.44993	6.72741	111.586	1.98727e-09	3.11216e-08
ENSMUSG00000094122.2	chr1	129729123	129729501	-	Rpl31-ps9	0.631002	4.72294	111.483	2.00237e-09	3.13191e-08
ENSMUSG00000013833.16	chr10	79730541	79744757	-	Med16	0.59381	4.67361	111.207	2.04377e-09	3.1927e-08
ENSMUSG00000074364.7	chr7	15680882	15701492	-	Ehd2	-0.304261	7.77063	111.059	2.06629e-09	3.22387e-08
ENSMUSG00000032216.16	chr9	72569627	72657134	+	Nedd4	0.307539	10.8976	110.885	2.09304e-09	3.26157e-08
ENSMUSG00000058672.8	chr13	34258256	34261990	-	Tubb2a	-0.552495	5.9413	110.741	2.11555e-09	3.28851e-08
ENSMUSG00000025738.9	chr17	26028058	26040229	+	Fbxl16	0.75888	4.19295	110.751	2.11408e-09	3.28851e-08
ENSMUSG00000025240.11	chr9	123358823	123421665	+	Sacm1l	0.398451	6.34661	110.576	2.14169e-09	3.32503e-08
ENSMUSG00000021027.18	chr12	55649680	55867952	-	Ralgapa1	0.4834	6.09374	110.558	2.14452e-09	3.32532e-08
ENSMUSG00000056131.14	chr9	86436429	86453895	-	Pgm3	-0.618453	4.33016	110.539	2.14763e-09	3.32606e-08
ENSMUSG00000037669.16	chr12	8258106	8335759	+	Ldah	-0.50632	5.5522	110.247	2.19482e-09	3.39496e-08
ENSMUSG00000095526.3	chr6	48500451	48500784	+	Gm10243	0.557033	4.61519	110.15	2.2108e-09	3.41548e-08
ENSMUSG00000046546.4	chr16	30418540	30421615	+	Fam43a	-0.559434	5.32048	110.129	2.21432e-09	3.41673e-08
ENSMUSG00000037278.10	chr11	78432642	78441603	-	Tmem97	-0.653916	5.78911	121.868	2.22107e-09	3.42296e-08
ENSMUSG00000019132.12	chr13	24985639	25000180	+	BC005537	0.316437	7.2165	109.979	2.23929e-09	3.44682e-08
ENSMUSG00000112474.2	chr10	7408355	7408908	+	Gm46209	0.646824	4.62971	109.948	2.24437e-09	3.45042e-08
ENSMUSG00000009555.17	chr2	32595795	32603088	-	Cdk9	-0.38689	6.34339	109.924	2.24852e-09	3.45258e-08
ENSMUSG00000018648.16	chr11	83938866	83960087	-	Dusp14	-0.459926	5.81246	109.738	2.27991e-09	3.49651e-08
ENSMUSG00000073775.5	chr4	108704981	108706610	+	Kti12	-0.643359	4.57786	109.548	2.31262e-09	3.54237e-08
ENSMUSG00000022324.16	chr15	34306822	34436419	+	Matn2	0.329492	7.23223	109.508	2.31966e-09	3.54882e-08
ENSMUSG00000062184.12	chrX	50476088	50770733	-	Hs6st2	-0.298619	7.73959	109.394	2.33958e-09	3.57495e-08
ENSMUSG00000001467.6	chr5	4131144	4154746	-	Cyp51	-0.400656	7.38579	109.374	2.34309e-09	3.57598e-08
ENSMUSG00000055302.6	chr5	36952210	36954116	-	Mrfap1	-0.32996	8.12313	109.345	2.34826e-09	3.57631e-08
ENSMUSG00000081049.2	chrX	78238652	78239054	+	Rps24-ps3	0.557769	5.23128	109.34	2.34899e-09	3.57631e-08
ENSMUSG00000031166.14	chrX	7989539	7999131	-	Wdr13	0.583665	5.33836	109.301	2.35596e-09	3.5826e-08
ENSMUSG00000042712.11	chrX	135145827	135147888	+	Tceal9	0.415225	7.03074	109.223	2.36976e-09	3.59924e-08
ENSMUSG00000024854.5	chr19	4281952	4283688	+	Pold4	0.831381	4.40464	111.549	2.3964e-09	3.63531e-08
ENSMUSG00000113555.2	chr12	86892551	86893241	-	Gm10095	0.574249	4.64017	109.024	2.40552e-09	3.64476e-08
ENSMUSG00000116657.2	chr17	27764680	27775492	-	Gm49774	-1.34064	2.44586	108.997	2.41038e-09	3.64773e-08
ENSMUSG00000111877.2	chr10	39074533	39075297	+	Gm6477	0.54924	4.10578	108.83	2.44103e-09	3.68968e-08
ENSMUSG00000029247.18	chr5	77099153	77115356	+	Paics	0.374238	8.27518	108.804	2.44578e-09	3.69243e-08
ENSMUSG00000021116.11	chr12	78908592	78933784	+	Eif2s1	-0.395046	6.89304	108.593	2.48507e-09	3.74725e-08
ENSMUSG00000026305.16	chr1	90926458	91056666	+	Lrrfip1	-0.36169	7.24433	108.533	2.49628e-09	3.75965e-08
ENSMUSG00000027408.8	chr2	130232694	130239494	-	Cpxm1	1.139	2.51792	108.494	2.50373e-09	3.76636e-08
ENSMUSG00000042535.10	chr15	79575045	79605680	+	Gtpbp1	0.341647	6.52983	108.272	2.54625e-09	3.82575e-08
ENSMUSG00000020175.16	chr10	74872889	74890580	+	Rab36	1.14784	2.48799	108.156	2.56875e-09	3.85496e-08
ENSMUSG00000031951.9	chr8	112638642	112660513	-	Tmem231	0.600933	4.66242	108.095	2.58053e-09	3.8645e-08
ENSMUSG00000040631.9	chr8	95590455	95602958	-	Dok4	0.556699	4.56295	108.092	2.58124e-09	3.8645e-08
ENSMUSG00000029208.17	chr5	69714265	69733316	+	Guf1	0.412357	6.29535	107.942	2.61068e-09	3.90393e-08
ENSMUSG00000080848.4	chr9	115869660	115870132	-	Gm9385	0.462638	6.56963	107.903	2.61852e-09	3.911e-08
ENSMUSG00000027680.16	chr3	34074091	34124471	+	Fxr1	0.418953	7.17463	107.77	2.64502e-09	3.94436e-08
ENSMUSG00000056313.6	chr8	24927195	24929000	-	Tcim	-0.514861	5.33926	107.76	2.64711e-09	3.94436e-08
ENSMUSG00000027533.11	chr3	10077607	10081667	+	Fabp5	-1.0275	4.8762	146.61	2.66342e-09	3.96396e-08
ENSMUSG00000004798.15	chr11	61666474	61745899	-	Ulk2	0.392728	6.41472	107.353	2.7304e-09	4.05884e-08
ENSMUSG00000022512.4	chr16	26175391	26190591	-	Cldn1	-1.32095	1.99729	107.326	2.73605e-09	4.06246e-08
ENSMUSG00000041957.16	chr16	16031181	16090576	+	Pkp2	0.54863	4.93126	106.811	2.84597e-09	4.22069e-08
ENSMUSG00000045216.8	chr1	36107480	36145527	+	Hs6st1	-0.407275	5.72112	106.597	2.8932e-09	4.28568e-08
ENSMUSG00000025417.9	chr10	127032935	127047454	-	Pip4k2c	0.324358	6.45786	106.54	2.90593e-09	4.29444e-08
ENSMUSG00000024382.14	chr18	32373352	32403204	+	Ercc3	-0.443521	5.42132	106.549	2.90389e-09	4.29444e-08
ENSMUSG00000002017.11	chr17	75844080	75858941	-	Fam98a	-0.414591	6.07071	106.481	2.91906e-09	4.30878e-08
ENSMUSG00000033538.14	chr9	5308827	5336783	+	Casp4	-0.715417	3.87886	106.421	2.93263e-09	4.32374e-08
ENSMUSG00000097296.2	chr8	84935548	84936238	+	Gm26532	0.794342	3.25892	106.368	2.9445e-09	4.33617e-08
ENSMUSG00000026792.17	chr2	32815227	32851626	-	Lrsam1	0.555748	4.54391	106.294	2.96125e-09	4.35574e-08
ENSMUSG00000032997.17	chr1	75451212	75455951	-	Chpf	-0.477203	6.3369	106.226	2.97689e-09	4.37202e-08
ENSMUSG00000057789.15	chr17	27238783	27247983	-	Bak1	-0.329777	7.00231	106.216	2.97926e-09	4.37202e-08
ENSMUSG00000059291.16	chr4	135755575	135780739	-	Rpl11	0.437973	8.05682	110.099	3.02608e-09	4.43555e-08
ENSMUSG00000047965.10	chr2	70289325	70289904	+	Rpl9-ps7	0.557741	5.5749	105.947	3.04161e-09	4.44796e-08
ENSMUSG00000029198.4	chr5	36622341	36631424	+	Grpel1	-0.443231	5.92153	105.948	3.04127e-09	4.44796e-08
ENSMUSG00000084111.5	chr5	92288152	92288788	-	Gm15710	0.494932	8.37461	123.707	3.0558e-09	4.46353e-08
ENSMUSG00000023235.15	chr8	4375209	4410020	+	Ccl25	0.671958	4.20791	105.835	3.06812e-09	4.47633e-08
ENSMUSG00000036478.9	chr10	96452867	96458671	+	Btg1	-0.295033	7.95777	105.588	3.12717e-09	4.5572e-08
ENSMUSG00000060950.13	chr12	111644538	111650336	+	Trmt61a	-0.762168	3.66355	105.552	3.13589e-09	4.55935e-08
ENSMUSG00000021583.8	chr13	74787686	74841320	+	Erap1	-0.522084	5.35971	105.565	3.13287e-09	4.55935e-08
ENSMUSG00000022476.9	chr15	81772428	81810441	-	Polr3h	-0.512202	5.48179	105.481	3.15319e-09	4.57921e-08
ENSMUSG00000003344.15	chr10	80478450	80492905	-	Btbd2	0.413629	6.27753	105.392	3.17513e-09	4.60577e-08
ENSMUSG00000040562.13	chr3	107889017	107893769	-	Gstm2	0.456924	5.6329	105.321	3.19249e-09	4.62562e-08
ENSMUSG00000063696.8	chr8	103591476	103592430	-	Gm8730	0.688434	6.05614	136.026	3.28786e-09	4.75833e-08
ENSMUSG00000042444.11	chr9	70506295	70564456	-	Mindy2	0.753222	3.67465	104.769	3.33273e-09	4.81772e-08
ENSMUSG00000002985.17	chr7	19430033	19433113	-	Apoe	1.39746	2.06756	104.419	3.42487e-09	4.94524e-08
ENSMUSG00000070972.14	chr4	58995061	59025573	+	Dnajc25	-0.636615	4.39055	104.343	3.44529e-09	4.96903e-08
ENSMUSG00000041921.17	chr2	71283619	71355538	+	Metap1d	0.484362	5.37412	104.231	3.47573e-09	5.0072e-08
ENSMUSG00000067288.14	chr17	34038000	34043536	-	Rps28	0.69075	7.37389	158.587	3.49348e-09	5.02127e-08
ENSMUSG00000024781.17	chr19	34469717	34504874	-	Lipa	-0.332857	6.69841	104.173	3.49142e-09	5.02127e-08
ENSMUSG00000034902.18	chr10	81128796	81155807	+	Pip5k1c	-0.346547	6.96739	104.098	3.51207e-09	5.04224e-08
ENSMUSG00000078851.5	chr11	58845510	58847656	+	H2aw	1.08734	2.70697	103.983	3.54375e-09	5.08194e-08
ENSMUSG00000024357.11	chr18	35399448	35632833	-	Sil1	-0.506238	5.30704	103.95	3.55294e-09	5.0838e-08
ENSMUSG00000049288.5	chr3	96508464	96533487	+	Lix1l	0.346756	7.32833	103.95	3.55313e-09	5.0838e-08
ENSMUSG00000016559.15	chr11	115912737	115918788	-	H3f3b	0.30191	8.39531	103.67	3.63192e-09	5.19063e-08
ENSMUSG00000039067.6	chr8	108307012	108315096	-	Psmd7	-0.300752	7.53697	103.434	3.70003e-09	5.28198e-08
ENSMUSG00000020818.17	chr11	116743265	116766461	+	Mfsd11	0.518585	5.04472	103.259	3.75146e-09	5.34503e-08
ENSMUSG00000074622.5	chr2	160205622	160208985	-	Mafb	1.22688	1.98538	103.253	3.75319e-09	5.34503e-08
ENSMUSG00000031328.17	chrX	73267066	73293426	-	Flna	0.480282	11.0932	115.354	3.75693e-09	5.34503e-08
ENSMUSG00000011256.17	chr11	45946818	46038170	+	Adam19	-0.654496	5.04155	103.059	3.81134e-09	5.41632e-08
ENSMUSG00000028101.19	chr3	96603699	96613386	+	Pias3	0.469332	4.92504	103.004	3.82792e-09	5.43375e-08
ENSMUSG00000030058.18	chr6	87864795	87890577	+	Copg1	0.298562	7.97623	102.667	3.93127e-09	5.57417e-08
ENSMUSG00000025212.18	chr19	45035941	45044822	+	Sfxn3	0.358829	7.18735	102.422	4.00842e-09	5.6768e-08
ENSMUSG00000036160.14	chr2	26778639	26792891	-	Surf6	-0.473085	5.29362	102.409	4.01267e-09	5.6768e-08
ENSMUSG00000024683.7	chr19	11747754	11752324	+	Mrpl16	-0.477281	4.80055	102.322	4.04038e-09	5.70959e-08
ENSMUSG00000059810.19	chr4	62478083	62622238	+	Rgs3	-0.418684	5.64082	102.257	4.06142e-09	5.73289e-08
ENSMUSG00000061130.14	chr17	85264168	85331419	+	Ppm1b	0.369717	5.9626	102.229	4.07037e-09	5.73908e-08
ENSMUSG00000026825.18	chr2	32198482	32243350	-	Dnm1	0.365877	6.96312	102.136	4.10088e-09	5.77563e-08
ENSMUSG00000066258.14	chr7	103949100	103964673	-	Trim12a	-1.17029	2.13624	101.45	4.33177e-09	6.094e-08
ENSMUSG00000028967.11	chr4	150938375	150953349	+	Errfi1	-0.415355	6.19949	101.426	4.34004e-09	6.09883e-08
ENSMUSG00000031245.9	chrX	108048139	108057010	-	Hmgn5	-0.854307	3.98607	101.396	4.35043e-09	6.10661e-08
ENSMUSG00000048285.10	chr12	70872287	70949008	+	Frmd6	-0.354544	7.58434	101.243	4.4041e-09	6.17506e-08
ENSMUSG00000022449.15	chr15	94168043	94363299	-	Adamts20	-1.0506	3.30977	101.154	4.4357e-09	6.21245e-08
ENSMUSG00000009739.18	chr15	100473198	100497865	-	Pou6f1	0.5433	5.43103	101.062	4.46851e-09	6.25145e-08
ENSMUSG00000068014.6	chrX	46989221	46989704	+	Gm14648	0.543051	4.68704	100.745	4.58401e-09	6.40592e-08
ENSMUSG00000037601.12	chr11	93847804	93859347	-	Nme1	-0.432807	6.79948	100.664	4.61419e-09	6.44094e-08
ENSMUSG00000062683.12	chr15	102571298	102580787	-	Atp5g2	0.42153	6.97842	100.261	4.76687e-09	6.64669e-08
ENSMUSG00000054256.12	chr5	115567657	115593757	+	Msi1	1.08912	2.48157	100.222	4.78184e-09	6.66019e-08
ENSMUSG00000091243.3	chr16	65612142	65663254	+	Vgll3	-0.300091	7.81147	100.09	4.83317e-09	6.72425e-08
ENSMUSG00000034807.10	chr8	72063641	72077555	+	Colgalt1	-0.308099	7.64677	100.021	4.86023e-09	6.75444e-08
ENSMUSG00000078566.9	chr7	138492564	138511248	-	Bnip3	0.588464	5.20835	99.8564	4.92566e-09	6.82277e-08
ENSMUSG00000058301.9	chr8	70784174	70805928	-	Upf1	-0.335849	7.11395	99.8655	4.92201e-09	6.82277e-08
ENSMUSG00000025289.16	chrX	154106913	154123750	-	Prdx4	-0.422394	6.39791	99.8569	4.92546e-09	6.82277e-08
ENSMUSG00000031015.9	chr7	109820917	109882713	+	Swap70	-0.351972	6.55478	99.7459	4.97008e-09	6.87462e-08
ENSMUSG00000083411.4	chrX	70847293	70847640	+	Rpl30-ps10	0.520538	5.49049	99.7361	4.97401e-09	6.87462e-08
ENSMUSG00000069682.7	chr10	29574741	29575376	-	Gm10275	0.438832	8.54014	107.539	5.04136e-09	6.96006e-08
ENSMUSG00000028312.20	chr4	52439242	52488260	+	Smc2	-0.497372	6.3051	99.5406	5.05376e-09	6.96954e-08
ENSMUSG00000002983.18	chr7	19340141	19363363	-	Relb	-0.334319	6.2402	99.4887	5.07516e-09	6.98375e-08
ENSMUSG00000062031.14	chr7	140521303	140527577	+	Pgghg	-0.674391	3.87674	99.4967	5.07184e-09	6.98375e-08
ENSMUSG00000082475.3	chr14	45941992	45951180	+	Gm7206	0.534632	4.99231	99.4488	5.09165e-09	6.99879e-08
ENSMUSG00000049521.3	chr15	78726823	78735097	+	Cdc42ep1	0.272892	7.59699	99.4328	5.09829e-09	7.00028e-08
ENSMUSG00000028399.19	chr4	75859474	78130198	-	Ptprd	-1.10684	2.62084	99.3896	5.11626e-09	7.01731e-08
ENSMUSG00000041351.17	chr4	137392036	137457172	+	Rap1gap	1.48585	1.32938	99.3321	5.14033e-09	7.04265e-08
ENSMUSG00000110275.2	chr7	140757797	140758377	-	Gm5905	0.650188	5.50309	110.134	5.16608e-09	7.07023e-08
ENSMUSG00000027896.16	chr3	107198545	107219431	+	Slc16a4	1.66753	2.15744	105.237	5.21475e-09	7.12909e-08
ENSMUSG00000062997.7	chr2	38891591	38895636	-	Rpl35	0.434725	8.10942	105.146	5.24993e-09	7.14332e-08
ENSMUSG00000002428.13	chr3	20111974	20172654	+	Hltf	0.388769	5.80236	99.0696	5.25166e-09	7.14332e-08
ENSMUSG00000078350.12	chr4	154104926	154110687	-	Smim1	0.965356	2.91355	99.0653	5.25353e-09	7.14332e-08
ENSMUSG00000031508.15	chr8	11661582	11685757	-	Ankrd10	0.369936	7.22847	99.0692	5.25182e-09	7.14332e-08
ENSMUSG00000025892.17	chr9	4417895	4796234	-	Gria4	-0.979599	2.41925	99.0992	5.23897e-09	7.14332e-08
ENSMUSG00000000711.4	chr10	128513043	128532133	-	Rab5b	0.331594	7.49644	98.8645	5.34049e-09	7.25223e-08
ENSMUSG00000003813.16	chr8	85560647	85567294	-	Rad23a	-0.424094	6.47157	98.8539	5.34514e-09	7.25223e-08
ENSMUSG00000021190.15	chr12	102360342	102406072	-	Lgmn	-0.30107	7.30117	98.8048	5.36667e-09	7.2736e-08
ENSMUSG00000022312.12	chr15	51649953	51728919	-	Eif3h	0.302086	9.14596	98.6985	5.41362e-09	7.32934e-08
ENSMUSG00000042675.16	chr7	126376126	126379686	+	Ypel3	0.463232	5.83879	98.6785	5.4225e-09	7.33348e-08
ENSMUSG00000118665.1	chr5	100589899	100648493	-	Lin54	-0.518367	5.24261	98.6346	5.44209e-09	7.35208e-08
ENSMUSG00000031352.11	chrX	168033188	168103368	-	Hccs	-0.423933	5.88343	98.5814	5.46587e-09	7.37629e-08
ENSMUSG00000005949.10	chr11	73074421	73089868	-	Ctns	0.465655	5.52511	98.4704	5.51592e-09	7.42015e-08
ENSMUSG00000097906.2	chr13	67958364	67959319	+	Gm9625	0.678645	3.97391	98.4701	5.51605e-09	7.42015e-08
ENSMUSG00000089810.2	chr9	45768066	45769655	-	Gm16536	0.808051	3.14507	98.4954	5.50462e-09	7.42015e-08
ENSMUSG00000046201.10	chr17	3165246	3249134	+	Scaf8	-0.43355	6.62145	98.3876	5.55358e-09	7.46267e-08
ENSMUSG00000020349.5	chr11	51989507	52018605	+	Ppp2ca	-0.283007	8.04863	98.3626	5.56499e-09	7.47003e-08
ENSMUSG00000027677.18	chr3	33853980	33869009	+	Ttc14	0.404644	7.04581	98.2018	5.63914e-09	7.56149e-08
ENSMUSG00000027460.8	chr2	151753129	151787257	+	Angpt4	-0.696644	4.27204	97.963	5.75122e-09	7.70358e-08
ENSMUSG00000020432.13	chr11	3867191	3882159	-	Tcn2	1.07668	2.38571	97.949	5.75787e-09	7.70429e-08
ENSMUSG00000063556.6	chr14	77489286	77489754	-	Gm10132	0.449182	7.06698	100.904	5.83351e-09	7.7972e-08
ENSMUSG00000048277.16	chr11	117700493	117705109	+	Syngr2	-0.407001	6.28415	97.7071	5.87408e-09	7.84311e-08
ENSMUSG00000044345.10	chr19	42135838	42140142	+	Marveld1	0.360785	6.28054	97.5841	5.93416e-09	7.91493e-08
ENSMUSG00000041859.11	chr1	20873191	20890536	-	Mcm3	-0.478515	6.8766	100.641	5.97432e-09	7.96007e-08
ENSMUSG00000052316.10	chr16	30088119	30102074	-	Lrrc15	-1.61822	4.45165	165.935	6.02009e-09	8.01257e-08
ENSMUSG00000003970.10	chr15	76788277	76790514	+	Rpl8	0.358032	10.3405	97.3037	6.07364e-09	8.06679e-08
ENSMUSG00000105879.2	chr3	53599842	53600299	-	Gm6204	0.555041	4.94479	97.3102	6.07037e-09	8.06679e-08
ENSMUSG00000033237.20	chr15	96185398	96302873	+	Arid2	0.327619	6.89162	97.1875	6.13253e-09	8.13642e-08
ENSMUSG00000116858.2	chr17	3248384	3361395	+	Gm49797	0.769055	3.90597	97.018	6.21953e-09	8.24317e-08
ENSMUSG00000021395.12	chr13	51254915	51306582	+	Spin1	-0.382888	6.27814	96.9471	6.25636e-09	8.28327e-08
ENSMUSG00000025869.12	chr13	54731997	54737903	-	Nop16	-0.524943	5.14798	96.9167	6.2722e-09	8.28866e-08
ENSMUSG00000055301.9	chr3	137923520	137939143	+	Adh7	-0.516947	4.90832	96.914	6.2736e-09	8.28866e-08
ENSMUSG00000035150.16	chrX	93232312	93256468	-	Eif2s3x	0.281224	7.33562	96.8889	6.28677e-09	8.29735e-08
ENSMUSG00000029826.15	chr6	38282220	38331538	-	Zc3hav1	-0.379815	6.84256	96.7564	6.35651e-09	8.37652e-08
ENSMUSG00000029918.10	chr6	39778737	39787922	-	Mrps33	-0.55623	4.50327	96.7497	6.36006e-09	8.37652e-08
ENSMUSG00000114995.2	chr15	31622117	31624181	+	Gm49284	1.13537	1.79856	96.7216	6.37501e-09	8.38743e-08
ENSMUSG00000117310.3	chr1	30979382	30988851	-	Ptp4a1	-0.483997	5.5686	96.6506	6.41289e-09	8.42847e-08
ENSMUSG00000028780.14	chr5	17779278	17935266	+	Sema3c	-0.557645	5.19015	96.6085	6.43544e-09	8.44928e-08
ENSMUSG00000015176.12	chr19	46064301	46073969	+	Nolc1	-0.308042	7.55945	96.5064	6.49054e-09	8.51275e-08
ENSMUSG00000026634.17	chr1	190657308	190679159	+	Angel2	-0.412973	5.32493	96.4378	6.52787e-09	8.53683e-08
ENSMUSG00000114551.2	chr13	115665091	115666308	-	Gm6035	0.689456	3.83037	96.4353	6.52924e-09	8.53683e-08
ENSMUSG00000012889.9	chr8	84852617	84859156	+	Podnl1	-0.680155	4.30301	96.4426	6.52527e-09	8.53683e-08
ENSMUSG00000027763.14	chr3	60380250	60537171	+	Mbnl1	-0.349824	7.35268	96.3945	6.55157e-09	8.55713e-08
ENSMUSG00000062937.8	chr4	89055358	89099318	+	Mtap	-0.297254	7.37378	96.3014	6.60278e-09	8.61508e-08
ENSMUSG00000042851.18	chr2	128809321	128860483	+	Zc3h6	0.676407	3.97887	96.2089	6.65412e-09	8.67309e-08
ENSMUSG00000020412.17	chr11	4587746	4635699	+	Ascc2	0.377657	6.82751	96.136	6.69491e-09	8.71722e-08
ENSMUSG00000053846.6	chr18	75072392	75094334	-	Lipg	-0.982935	2.67399	96.1094	6.70984e-09	8.71863e-08
ENSMUSG00000030521.12	chr7	64026274	64042016	-	Mphosph10	-0.394747	5.76323	96.1212	6.70323e-09	8.71863e-08
ENSMUSG00000036533.10	chr17	79641155	79662520	-	Cdc42ep3	-0.373422	6.87708	96.0235	6.75838e-09	8.77265e-08
ENSMUSG00000020790.15	chr11	72580831	72662972	+	Ankfy1	-0.403378	7.06178	96.0088	6.76674e-09	8.77447e-08
ENSMUSG00000067203.9	chr17	34193632	34197801	-	H2-K2	-1.17961	1.9792	95.9578	6.79575e-09	8.80302e-08
ENSMUSG00000030796.18	chr7	44865176	44883068	+	Tead2	0.334846	7.15476	95.8919	6.83345e-09	8.84275e-08
ENSMUSG00000033152.14	chr6	88819539	88852026	-	Podxl2	0.816249	4.04859	95.8185	6.87578e-09	8.88839e-08
ENSMUSG00000026308.9	chr1	91278737	91290138	+	Klhl30	-1.42638	1.95247	95.781	6.89748e-09	8.9073e-08
ENSMUSG00000025403.6	chr10	127352991	127358313	-	Shmt2	-0.336393	9.45161	95.5725	7.01955e-09	9.05566e-08
ENSMUSG00000019579.14	chr17	56482743	56490920	-	Mydgf	-0.431105	6.28456	95.2808	7.19442e-09	9.27174e-08
ENSMUSG00000032180.12	chr9	21418848	21421548	-	Tmed1	-0.571434	4.84198	95.0651	7.32685e-09	9.43276e-08
ENSMUSG00000078651.9	chr11	101215888	101220528	+	Aoc2	1.06345	3.04531	94.8943	7.43358e-09	9.56039e-08
ENSMUSG00000095847.2	chr13	67022144	67022723	+	Gm5451	0.549621	4.93306	94.7436	7.52918e-09	9.66717e-08
ENSMUSG00000027710.15	chr3	36120127	36147002	+	Acad9	-0.407237	5.60621	94.7392	7.53197e-09	9.66717e-08
ENSMUSG00000043889.7	chr13	81212802	81213919	+	Gm8399	0.430395	6.7434	94.6518	7.58808e-09	9.72927e-08
ENSMUSG00000099471.2	chr1	127210398	127210845	-	Gm8451	0.632152	4.94319	94.5063	7.6825e-09	9.84032e-08
ENSMUSG00000074108.2	chr8	107654400	107655045	-	Rpl10-ps2	0.687799	3.57647	94.4874	7.69484e-09	9.84611e-08
ENSMUSG00000008822.16	chr12	85319171	85335212	-	Acyp1	0.770488	3.20603	94.3228	7.80345e-09	9.96484e-08
ENSMUSG00000028803.19	chr4	135172730	135222349	-	Nipal3	1.03131	2.30139	94.3233	7.80308e-09	9.96484e-08
ENSMUSG00000018583.6	chr11	55360510	55395664	+	G3bp1	-0.280832	8.3133	94.3031	7.81653e-09	9.97142e-08
ENSMUSG00000027634.15	chr2	156769264	156833976	-	Ndrg3	0.379506	5.92743	94.2448	7.85547e-09	1.0011e-07
ENSMUSG00000057411.10	chr17	26009053	26011875	-	Antkmt	-0.472185	4.87699	94.2202	7.87198e-09	1.00141e-07
ENSMUSG00000068240.6	chr4	3973091	3973595	-	Gm11808	0.41449	6.90105	94.2174	7.87381e-09	1.00141e-07
ENSMUSG00000052833.10	chr7	16054158	16121731	-	Sae1	-0.32555	7.17338	94.1786	7.89991e-09	1.00371e-07
ENSMUSG00000017692.9	chr11	80191737	80246781	+	Rhbdl3	1.42804	1.62216	94.0635	7.9779e-09	1.0126e-07
ENSMUSG00000025208.10	chr19	44993267	44994881	-	Mrpl43	-0.568214	5.19817	94.0103	8.01421e-09	1.01536e-07
ENSMUSG00000033916.6	chr7	12765936	12768734	-	Chmp2a	-0.400649	5.79977	94.008	8.01582e-09	1.01536e-07
ENSMUSG00000001918.18	chr7	16515264	16532199	+	Slc1a5	0.423799	7.41177	96.9185	8.02722e-09	1.01579e-07
ENSMUSG00000020303.3	chr11	31307306	31320074	-	Stc2	-0.477913	5.60222	93.939	8.06321e-09	1.01932e-07
ENSMUSG00000093587.4	chr13	72774331	72776683	-	Gm20554	0.869204	2.55191	93.7989	8.16043e-09	1.02954e-07
ENSMUSG00000001349.6	chr9	22010511	22020926	+	Cnn1	0.444197	7.29802	97.5782	8.15904e-09	1.02954e-07
ENSMUSG00000039483.11	chr2	30713108	30720345	-	Asb6	-0.428019	5.57877	93.7593	8.18814e-09	1.032e-07
ENSMUSG00000020674.18	chr12	29987606	30067657	+	Pxdn	0.377018	7.84833	93.7293	8.20914e-09	1.03258e-07
ENSMUSG00000004446.13	chr6	120868890	120893814	-	Bid	-0.32319	6.32708	93.7346	8.20543e-09	1.03258e-07
ENSMUSG00000082901.2	chr2	177534430	177535057	+	Rps8-ps5	0.54576	4.65741	93.4748	8.39026e-09	1.05431e-07
ENSMUSG00000024620.12	chr18	61178221	61218133	+	Pdgfrb	-0.289862	8.18731	93.422	8.42837e-09	1.05804e-07
ENSMUSG00000005469.11	chr8	84699621	84723072	+	Prkaca	0.289356	7.02487	93.3218	8.50122e-09	1.06612e-07
ENSMUSG00000063953.4	chr10	35584670	35587888	-	Amd2	-0.377419	5.44511	93.2679	8.54073e-09	1.07001e-07
ENSMUSG00000028034.16	chr3	151916058	151942463	+	Fubp1	0.363688	7.64488	93.197	8.593e-09	1.07549e-07
ENSMUSG00000031200.17	chrX	74454049	74460194	-	Mtcp1	0.797655	3.36214	93.0381	8.71132e-09	1.08922e-07
ENSMUSG00000052139.19	chr5	31855027	32242306	+	Babam2	-0.460438	5.21013	92.9566	8.7728e-09	1.09582e-07
ENSMUSG00000023994.14	chr17	48693912	48716934	-	Nfya	0.32632	6.45358	92.7598	8.92301e-09	1.11348e-07
ENSMUSG00000026109.15	chr1	50939805	51226429	+	Tmeff2	-1.077	2.5729	92.5556	9.08199e-09	1.13219e-07
ENSMUSG00000079057.5	chr8	45757980	45786253	-	Cyp4v3	-0.483734	4.75553	92.5272	9.10431e-09	1.13385e-07
ENSMUSG00000030095.11	chr6	91450684	91465445	+	Tmem43	-0.347518	6.24358	92.3228	9.26702e-09	1.15297e-07
ENSMUSG00000024268.17	chr18	25610688	25887214	-	Celf4	0.735252	3.67899	92.2546	9.32199e-09	1.15753e-07
ENSMUSG00000029163.10	chr5	31070745	31078621	+	Emilin1	0.272814	8.42058	92.2624	9.31569e-09	1.15753e-07
ENSMUSG00000025986.7	chr1	46846703	46932012	-	Slc39a10	-0.532571	5.56854	92.1073	9.442e-09	1.16897e-07
ENSMUSG00000026864.14	chr2	34661981	34667559	+	Hspa5	-0.287679	9.5881	92.1264	9.42634e-09	1.16897e-07
ENSMUSG00000038210.11	chr6	52219085	52222790	-	Hoxa11	0.484068	5.62127	92.1105	9.43937e-09	1.16897e-07
ENSMUSG00000022791.20	chr16	32462691	32502311	+	Tnk2	-0.381894	7.87671	92.0043	9.52695e-09	1.17833e-07
ENSMUSG00000005103.13	chr5	38684155	38720564	-	Wdr1	0.294782	8.10865	91.9674	9.55761e-09	1.18096e-07
ENSMUSG00000004788.12	chr12	85266254	85273402	+	Eif2b2	-0.386419	5.74062	91.8449	9.66003e-09	1.19245e-07
ENSMUSG00000068856.4	chr3	96079647	96084880	+	Sf3b4	-0.396376	6.64137	91.8125	9.68739e-09	1.19465e-07
ENSMUSG00000062590.14	chr1	86082501	86206006	+	Armc9	0.71499	3.45207	91.7495	9.74069e-09	1.20005e-07
ENSMUSG00000041548.5	chr5	116546549	116560923	-	Hspb8	0.43734	5.98531	91.7132	9.77157e-09	1.20268e-07
ENSMUSG00000022346.18	chr15	61857239	61862223	+	Myc	-0.297199	8.0019	91.6516	9.82418e-09	1.20797e-07
ENSMUSG00000001525.11	chr17	36144812	36149198	-	Tubb5	0.328699	9.74877	91.5618	9.90151e-09	1.21629e-07
ENSMUSG00000061848.6	chr15	81856590	81857046	+	Gm5805	0.506601	4.66752	91.4634	9.98698e-09	1.2256e-07
ENSMUSG00000108207.3	chr5	148890557	148906932	-	1810059H22Rik	1.0825	2.63	91.408	1.00355e-08	1.23035e-07
ENSMUSG00000020476.15	chr11	5738487	5750962	+	Dbnl	-0.33245	6.12346	91.3784	1.00615e-08	1.23132e-07
ENSMUSG00000075419.5	chr2	30174242	30176346	-	Dolk	-0.634741	3.75745	91.3768	1.00629e-08	1.23132e-07
ENSMUSG00000082465.2	chr9	53600833	53601583	-	Rps6-ps3	0.586164	4.1716	91.2254	1.01972e-08	1.24653e-07
ENSMUSG00000032294.18	chr9	59563650	59586658	+	Pkm	0.290948	10.1345	91.1755	1.02419e-08	1.25078e-07
ENSMUSG00000045594.11	chr9	114230143	114303966	+	Glb1	0.422297	5.89178	91.1346	1.02787e-08	1.25406e-07
ENSMUSG00000040133.3	chr2	118107590	118203900	-	Gpr176	-0.312738	6.31048	90.8185	1.05679e-08	1.2881e-07
ENSMUSG00000080059.5	chr4	147906233	147906659	-	Rps19-ps3	0.707185	3.8262	90.7481	1.06335e-08	1.29484e-07
ENSMUSG00000022160.19	chr14	52532297	52542585	-	Mettl3	-0.462524	5.04361	90.7127	1.06667e-08	1.29763e-07
ENSMUSG00000079197.11	chr14	55824897	55828570	-	Psme2	-0.557221	5.57857	93.3935	1.07393e-08	1.30519e-07
ENSMUSG00000024816.13	chr19	5899729	5925302	-	Frmd8	-0.371546	5.76679	90.6121	1.07616e-08	1.30665e-07
ENSMUSG00000101878.2	chr6	116150697	116151084	+	Gm8203	-0.484796	5.50925	90.5742	1.07977e-08	1.30976e-07
ENSMUSG00000066315.10	chr4	10848419	10849055	+	Gm12918	0.497405	7.8353	109.974	1.09075e-08	1.32181e-07
ENSMUSG00000026662.14	chr2	4886374	4915368	+	Sephs1	-0.354828	6.26706	90.385	1.09793e-08	1.32924e-07
ENSMUSG00000042506.16	chr11	61042610	61065881	-	Usp22	0.314635	7.30844	90.3531	1.10103e-08	1.3317e-07
ENSMUSG00000112825.2	chr10	56373436	56374190	+	Gm9118	0.558111	5.62057	95.5995	1.1021e-08	1.33172e-07
ENSMUSG00000032324.12	chr9	56039008	56072761	-	Tspan3	0.316979	6.80061	90.2308	1.11299e-08	1.34359e-07
ENSMUSG00000097039.9	chr15	61909834	62249945	+	Pvt1	-0.433493	5.76369	90.1437	1.1216e-08	1.35185e-07
ENSMUSG00000003199.17	chr17	56312710	56323790	+	Mpnd	-0.349645	6.25839	90.1398	1.12198e-08	1.35185e-07
ENSMUSG00000044066.15	chr11	20177036	20199429	-	Cep68	0.412479	5.36001	90.0276	1.13318e-08	1.36386e-07
ENSMUSG00000037089.12	chr17	45874799	45878597	+	Slc35b2	-0.366988	5.84938	90.0184	1.13411e-08	1.36386e-07
ENSMUSG00000020668.11	chr12	3415131	3456494	+	Kif3c	0.437521	5.86213	89.9959	1.13638e-08	1.36528e-07
ENSMUSG00000034203.9	chr6	91439153	91450528	-	Chchd4	-0.521573	4.43657	89.9287	1.14316e-08	1.37212e-07
ENSMUSG00000002504.16	chr17	24858259	24869301	-	Slc9a3r2	0.675516	4.22806	89.8787	1.14824e-08	1.3769e-07
ENSMUSG00000050244.10	chr13	12409907	12455170	+	Heatr1	-0.376155	6.31701	89.7505	1.16138e-08	1.39001e-07
ENSMUSG00000028029.12	chr3	132366241	132390131	-	Aimp1	0.379244	6.17731	89.7604	1.16036e-08	1.39001e-07
ENSMUSG00000079942.6	chr4	125963659	125964052	-	Rpl28-ps3	0.495231	5.15045	89.5846	1.17862e-08	1.40931e-07
ENSMUSG00000111613.2	chr9	17643965	17645227	+	Gm4977	0.867931	2.80222	89.4251	1.19548e-08	1.42811e-07
ENSMUSG00000063328.7	chr3	129862060	129862627	+	Gm9396	0.424844	5.86502	89.4082	1.19728e-08	1.42859e-07
ENSMUSG00000095597.3	chrX	151692500	151693151	-	Rps7-ps3	0.563627	6.16341	105.767	1.19815e-08	1.42859e-07
ENSMUSG00000067121.3	chr7	101222666	101223528	-	Gm7027	0.441994	5.4339	89.2887	1.2101e-08	1.44148e-07
ENSMUSG00000042156.17	chr14	119112931	119162872	-	Dzip1	0.336051	6.57742	89.2249	1.217e-08	1.44833e-07
ENSMUSG00000025366.9	chr10	128345833	128361740	-	Esyt1	0.280772	7.38324	89.1625	1.2238e-08	1.45163e-07
ENSMUSG00000048327.7	chr2	129110129	129139132	-	Ckap2l	-0.531901	6.05042	90.981	1.22313e-08	1.45163e-07
ENSMUSG00000056596.9	chr4	133218410	133225861	-	Trnp1	1.02377	4.9303	136.57	1.22511e-08	1.45163e-07
ENSMUSG00000007594.11	chr8	70536106	70543512	+	Hapln4	0.894871	2.56767	89.1805	1.22183e-08	1.45163e-07
ENSMUSG00000017765.18	chr8	106670221	106692729	-	Slc12a4	-0.311723	7.301	89.1466	1.22554e-08	1.45163e-07
ENSMUSG00000005354.17	chr15	77799246	77813206	-	Txn2	-0.325547	7.20275	89.0294	1.23844e-08	1.46553e-07
ENSMUSG00000062582.7	chr12	99013488	99013833	+	Rpl30-ps8	0.545142	4.56207	89.0089	1.24072e-08	1.46684e-07
ENSMUSG00000027800.15	chr3	57193031	57209409	-	Tm4sf1	-0.732432	6.03722	121.57	1.24572e-08	1.47137e-07
ENSMUSG00000000568.16	chr5	100103793	100126797	-	Hnrnpd	-0.289527	7.06602	88.9429	1.24807e-08	1.47276e-07
ENSMUSG00000021550.7	chr13	58527630	58533039	-	2210016F16Rik	-0.581839	4.26812	88.862	1.25714e-08	1.48208e-07
ENSMUSG00000031628.10	chr8	47070325	47092724	+	Casp3	0.390022	6.27258	88.5398	1.29399e-08	1.5241e-07
ENSMUSG00000037236.17	chr18	35695190	35726888	+	Matr3	0.543277	7.50992	113.252	1.31842e-08	1.55142e-07
ENSMUSG00000083033.2	chrX	20105707	20106526	+	Gm9083	0.795043	2.88892	88.2745	1.32523e-08	1.55798e-07
ENSMUSG00000068551.13	chr6	48404630	48422759	-	Zfp467	1.21406	2.33668	88.2599	1.32696e-08	1.55856e-07
ENSMUSG00000064068.16	chr3	89116387	89134395	-	Mtx1	-0.427092	5.21059	88.2205	1.33168e-08	1.56265e-07
ENSMUSG00000003233.13	chr16	20335731	20352760	+	Dvl3	0.36988	6.16018	88.1946	1.33479e-08	1.56382e-07
ENSMUSG00000026991.21	chr2	58991193	59185552	+	Pkp4	-0.42906	5.75828	88.1915	1.33517e-08	1.56382e-07
ENSMUSG00000039568.7	chr16	4692641	4698179	-	Ubald1	-0.404123	5.85341	88.1388	1.34152e-08	1.5698e-07
ENSMUSG00000066902.8	chr8	3633798	3634230	-	Rps23-ps2	0.68348	6.14638	124.328	1.34389e-08	1.57111e-07
ENSMUSG00000091086.3	chr10	110961711	110962582	+	Rpl6l	0.462459	6.64006	93.2054	1.36504e-08	1.59436e-07
ENSMUSG00000029513.15	chr5	116151644	116162567	-	Prkab1	-0.415593	5.17779	87.9048	1.37016e-08	1.59885e-07
ENSMUSG00000041057.11	chr17	71922889	71966026	+	Wdr43	-0.296102	7.52249	87.8492	1.37706e-08	1.60542e-07
ENSMUSG00000058064.7	chr18	15965850	15966384	+	Gm10036	0.48885	5.26591	87.8279	1.37972e-08	1.60703e-07
ENSMUSG00000105031.2	chr5	113905183	113905387	+	Gm3511	0.746221	3.13393	87.8003	1.38316e-08	1.60956e-07
ENSMUSG00000029174.19	chr5	64313647	64508829	+	Tbc1d1	-0.369435	5.87527	87.7278	1.39226e-08	1.61865e-07
ENSMUSG00000111964.2	chr10	115105882	115106282	+	Gm8942	0.539628	5.20012	87.7066	1.39493e-08	1.62026e-07
ENSMUSG00000081214.4	chr1	181069552	181069885	-	Rpl35a-ps2	0.569429	4.35115	87.6666	1.4e-08	1.62464e-07
ENSMUSG00000028277.14	chr4	33031415	33052363	+	Ube2j1	-0.330597	6.58314	87.4992	1.42139e-08	1.64795e-07
ENSMUSG00000025036.8	chr19	46561803	46586505	+	Sfxn2	-0.570484	4.17418	87.4332	1.42993e-08	1.65633e-07
ENSMUSG00000084106.5	chr1	86836514	86837405	-	Gm6136	0.417554	7.69231	92.2994	1.44524e-08	1.67252e-07
ENSMUSG00000001281.11	chr15	102124429	102140379	-	Itgb7	-1.49898	1.58924	87.2856	1.44923e-08	1.6756e-07
ENSMUSG00000021585.11	chr13	74840486	74956929	-	Cast	0.345485	7.68891	87.2629	1.45222e-08	1.67752e-07
ENSMUSG00000047205.13	chr11	3845239	3851296	+	Dusp18	0.443223	5.37552	87.2408	1.45515e-08	1.67782e-07
ENSMUSG00000008373.17	chr7	3632983	3645485	+	Prpf31	-0.439877	5.60201	87.2465	1.45439e-08	1.67782e-07
ENSMUSG00000094936.9	chr19	4834320	4843929	-	Rbm4	0.533294	4.59773	87.1801	1.4632e-08	1.68556e-07
ENSMUSG00000033166.12	chr14	99312641	99337206	-	Dis3	-0.274616	7.20105	87.1305	1.46982e-08	1.69164e-07
ENSMUSG00000027195.11	chr2	93863033	93988309	-	Hsd17b12	-0.335196	6.63114	87.0129	1.48564e-08	1.70828e-07
ENSMUSG00000040795.13	chr4	129508918	129512892	-	Iqcc	-0.634394	3.80241	86.8756	1.50435e-08	1.72822e-07
ENSMUSG00000021218.11	chr13	3588062	3617871	+	Gdi2	0.272037	8.27494	86.8425	1.50891e-08	1.73188e-07
ENSMUSG00000051403.10	chr7	19264724	19297001	-	Ppp1r37	-0.377308	6.12067	86.675	1.53217e-08	1.75697e-07
ENSMUSG00000026479.14	chr1	152998501	153062193	-	Lamc2	-1.19102	2.44705	86.6464	1.53619e-08	1.75997e-07
ENSMUSG00000024824.8	chr19	4245194	4251661	-	Rad9a	-0.383391	5.88047	86.5557	1.54898e-08	1.77257e-07
ENSMUSG00000029036.19	chr4	155825097	155845550	-	Atad3a	-0.387256	6.11019	86.5485	1.54999e-08	1.77257e-07
ENSMUSG00000065990.13	chr4	155915728	155917587	+	Aurkaip1	-0.448641	5.68068	86.5022	1.55659e-08	1.77849e-07
ENSMUSG00000036181.3	chr13	23922790	23924350	+	H1f2	0.661948	4.04709	86.352	1.57816e-08	1.80129e-07
ENSMUSG00000043059.17	chr5	31356324	31359647	-	Zfp513	-0.545783	4.73582	86.3434	1.5794e-08	1.80129e-07
ENSMUSG00000026281.16	chr1	93720297	93729656	-	Dtymk	-0.43032	5.17086	86.2724	1.58973e-08	1.81076e-07
ENSMUSG00000028039.12	chr3	89221205	89230272	-	Efna3	1.32189	2.34745	86.2665	1.59058e-08	1.81076e-07
ENSMUSG00000027907.5	chr3	93427794	93433594	+	S100a11	0.307358	8.0683	86.0323	1.62517e-08	1.8468e-07
ENSMUSG00000029552.20	chr6	17065147	17105827	+	Tes	0.426009	5.93118	86.0405	1.62395e-08	1.8468e-07
ENSMUSG00000029263.16	chr5	108460474	108497221	+	Pigg	0.570174	4.29162	85.973	1.63406e-08	1.85523e-07
ENSMUSG00000022828.11	chr16	37330151	37360151	-	Gtf2e1	-0.402631	5.10481	85.9263	1.6411e-08	1.86154e-07
ENSMUSG00000049858.9	chr10	128505762	128509942	-	Suox	-0.47433	4.54707	85.9038	1.64451e-08	1.86373e-07
ENSMUSG00000117804.2	chr19	9193744	9194324	+	Gm6252	0.527845	4.62481	85.8401	1.65419e-08	1.87301e-07
ENSMUSG00000046807.11	chr10	75385956	75396164	-	Lrrc75b	0.557471	4.46952	85.8267	1.65624e-08	1.87365e-07
ENSMUSG00000047921.18	chr15	72461468	72933053	-	Trappc9	0.323461	5.8934	85.7575	1.66684e-08	1.88132e-07
ENSMUSG00000035390.17	chr7	4693602	4718996	+	Brsk1	0.521822	4.34439	85.7437	1.66896e-08	1.88132e-07
ENSMUSG00000038387.10	chr7	44667384	44671071	+	Rras	0.388307	6.30028	85.7434	1.669e-08	1.88132e-07
ENSMUSG00000049305.7	chr9	108337725	108343137	+	Ccdc71	-0.432192	5.41119	85.7521	1.66766e-08	1.88132e-07
ENSMUSG00000027323.11	chr2	118943273	118977926	+	Rad51	-0.66273	4.98134	85.7161	1.67321e-08	1.88438e-07
ENSMUSG00000004891.17	chr3	87878384	87887758	+	Nes	-0.62231	6.39941	109.63	1.687e-08	1.89796e-07
ENSMUSG00000004567.17	chr8	3550456	3565232	+	Mcoln1	0.342277	6.70451	85.6189	1.68828e-08	1.89796e-07
ENSMUSG00000030254.17	chr6	112596810	112673647	-	Rad18	-0.567586	5.23056	85.5989	1.69141e-08	1.89978e-07
ENSMUSG00000027613.16	chr2	155661751	155668845	-	Eif6	-0.337545	6.64295	85.5587	1.69771e-08	1.90515e-07
ENSMUSG00000050947.10	chr3	108093650	108099602	+	Amigo1	1.05765	2.75849	85.417	1.72009e-08	1.92855e-07
ENSMUSG00000026083.13	chr1	38037090	38094660	+	Eif5b	-0.321475	7.56876	85.4055	1.72192e-08	1.92889e-07
ENSMUSG00000004319.16	chr8	61363422	61436334	-	Clcn3	-0.356997	6.00218	85.3893	1.72451e-08	1.93007e-07
ENSMUSG00000050910.6	chr11	115272741	115286958	+	Cdr2l	-0.463458	5.50398	85.3451	1.73158e-08	1.93626e-07
ENSMUSG00000085791.5	chrX	104322242	104322587	-	Rpl30-ps9	0.589168	4.38034	85.2815	1.74181e-08	1.94598e-07
ENSMUSG00000084345.4	chr4	63813781	63814336	-	Rpl17-ps4	0.715457	3.17588	85.1713	1.75969e-08	1.9642e-07
ENSMUSG00000034430.17	chr6	90346473	90380472	+	Zxdc	0.389775	5.49871	85.1116	1.76947e-08	1.97337e-07
ENSMUSG00000053460.9	chr6	72391290	72407695	+	Ggcx	-0.514917	4.81184	85.084	1.774e-08	1.97668e-07
ENSMUSG00000067058.8	chr5	105945186	105945579	-	Rps15a-ps5	0.746361	3.83015	85.0035	1.78731e-08	1.98975e-07
ENSMUSG00000051098.7	chr13	81859459	81901394	+	Mblac2	1.25575	1.42832	84.9282	1.79987e-08	2.00143e-07
ENSMUSG00000061360.9	chr15	81748720	81756112	-	Phf5a	-0.469982	5.84233	84.9215	1.80098e-08	2.00143e-07
ENSMUSG00000038227.16	chr6	52200079	52208069	-	Hoxa9	0.37464	5.73741	84.8504	1.81293e-08	2.01234e-07
ENSMUSG00000035704.18	chr7	97020812	97041392	+	Alg8	-0.558653	4.29198	84.8441	1.814e-08	2.01234e-07
ENSMUSG00000002249.22	chr17	28550644	28569791	-	Tead3	0.404533	5.36801	84.7445	1.8309e-08	2.0293e-07
ENSMUSG00000046756.11	chr11	115494750	115498862	+	Mrps7	-0.4653	5.43502	84.4102	1.88889e-08	2.09173e-07
ENSMUSG00000009291.14	chr10	77417553	77434566	+	Pttg1ip	-0.257906	8.38356	84.2458	1.91815e-08	2.12227e-07
ENSMUSG00000003352.15	chr15	98528720	98542410	+	Cacnb3	0.33529	6.43917	84.1949	1.92732e-08	2.13054e-07
ENSMUSG00000063457.15	chr10	80128286	80129948	+	Rps15	0.35827	9.43597	84.1313	1.93883e-08	2.14139e-07
ENSMUSG00000040118.16	chr5	16139688	16579509	+	Cacna2d1	0.376445	5.82054	84.0982	1.94485e-08	2.14615e-07
ENSMUSG00000055093.11	chr6	122433862	122434333	+	Rps27a-ps3	0.497332	6.80461	97.7216	1.95801e-08	2.15878e-07
ENSMUSG00000025962.16	chr1	63769772	63793814	+	Fastkd2	-0.487353	4.36671	83.997	1.96338e-08	2.16281e-07
ENSMUSG00000010051.16	chr9	107454125	107458909	+	Hyal1	0.802595	3.36837	83.8536	1.99001e-08	2.19022e-07
ENSMUSG00000020549.15	chr11	64869863	64892895	+	Elac2	-0.404502	5.39008	83.796	2.0008e-08	2.20019e-07
ENSMUSG00000024883.9	chr19	5100508	5107099	+	Rin1	-0.287619	7.38715	83.7578	2.008e-08	2.20618e-07
ENSMUSG00000021495.11	chr13	55687128	55718933	-	Fam193b	0.349931	6.26651	83.6879	2.02125e-08	2.21879e-07
ENSMUSG00000029428.14	chr5	129061620	129085638	-	Stx2	0.395531	5.36389	83.6473	2.02898e-08	2.22355e-07
ENSMUSG00000002984.18	chr7	19435237	19449363	-	Tomm40	-0.342792	6.12399	83.6466	2.02911e-08	2.22355e-07
ENSMUSG00000118383.2	chr19	9806262	9814261	-	Gm50321	1.15056	1.81163	83.5891	2.04014e-08	2.23369e-07
ENSMUSG00000117869.2	chr18	35686423	35691369	+	Snhg4	0.660916	3.78782	83.5656	2.04465e-08	2.23668e-07
ENSMUSG00000074676.3	chr2	152773817	152775128	-	Foxs1	-0.783434	3.79529	83.4738	2.06243e-08	2.25417e-07
ENSMUSG00000098915.2	chr9	71968218	71968831	+	Rpl15-ps2	0.497238	4.74048	83.4185	2.07321e-08	2.26399e-07
ENSMUSG00000006369.15	chr15	85090149	85170736	+	Fbln1	-0.529217	5.46193	83.37	2.08273e-08	2.27241e-07
ENSMUSG00000058056.17	chr8	61964466	62355724	-	Palld	0.332676	7.92524	83.3461	2.08742e-08	2.27556e-07
ENSMUSG00000045767.10	chr13	55840936	55851313	+	B230219D22Rik	0.286061	7.07534	83.3095	2.09465e-08	2.28147e-07
ENSMUSG00000045427.14	chrX	133501927	133507809	+	Hnrnph2	0.324372	6.77905	83.0475	2.1472e-08	2.33668e-07
ENSMUSG00000115938.2	chr15	99604442	99604694	-	Gm17241	0.809595	2.81633	82.9673	2.16357e-08	2.35247e-07
ENSMUSG00000064337.1	chrM	69	1024	+	mt-Rnr1	0.416465	7.18143	85.3154	2.17404e-08	2.36181e-07
ENSMUSG00000032834.12	chr10	78006742	78020983	-	Pwp2	-0.380001	6.187	82.8883	2.17985e-08	2.36608e-07
ENSMUSG00000078193.3	chr1	156193609	156194054	+	Gm2000	0.466113	6.84845	91.5727	2.19227e-08	2.37527e-07
ENSMUSG00000039756.13	chr3	122068036	122078920	+	Dnttip2	-0.283721	6.52626	82.8294	2.19206e-08	2.37527e-07
ENSMUSG00000031657.17	chr8	88864482	88898655	+	Heatr3	-0.331661	6.61408	82.8202	2.19398e-08	2.37527e-07
ENSMUSG00000025647.17	chr9	108867632	108886845	+	Shisa5	-0.29029	7.26173	82.786	2.20112e-08	2.38095e-07
ENSMUSG00000018379.18	chr11	87938198	87944581	+	Srsf1	0.247418	8.27566	82.6658	2.2264e-08	2.40416e-07
ENSMUSG00000020929.15	chr11	102729298	102771811	-	Eftud2	-0.279683	7.02365	82.6735	2.22477e-08	2.40416e-07
ENSMUSG00000024454.17	chr18	38068896	38088069	-	Hdac3	-0.310836	6.48792	82.6399	2.23188e-08	2.40802e-07
ENSMUSG00000015745.10	chr3	95895740	95903313	-	Plekho1	-0.431193	5.29385	82.5733	2.24605e-08	2.42124e-07
ENSMUSG00000074238.7	chr3	127600655	127631172	-	Ap1ar	-0.361054	5.84898	82.5496	2.25114e-08	2.42464e-07
ENSMUSG00000028937.15	chr4	152262590	152356312	+	Acot7	0.333527	6.13176	82.5167	2.25819e-08	2.43016e-07
ENSMUSG00000055053.19	chr10	81232019	81291469	-	Nfic	0.304641	8.12198	82.487	2.26458e-08	2.43312e-07
ENSMUSG00000109509.2	chr7	30184125	30184522	-	Rps12-ps4	0.889209	6.33011	157.011	2.2648e-08	2.43312e-07
ENSMUSG00000116174.2	chr15	73300207	73300759	-	Gm10362	0.681268	3.88409	82.4147	2.28024e-08	2.44761e-07
ENSMUSG00000003200.11	chr17	56323749	56343635	-	Sh3gl1	-0.384325	7.19662	82.3994	2.28357e-08	2.4491e-07
ENSMUSG00000025512.16	chr7	141073048	141119770	-	Chid1	-0.402977	5.23991	82.3595	2.29227e-08	2.45634e-07
ENSMUSG00000060224.5	chr19	42714296	42741214	-	Pyroxd2	0.929092	2.79802	82.2658	2.31285e-08	2.47628e-07
ENSMUSG00000041241.13	chr4	138161981	138169576	+	Mul1	-0.520586	4.55166	82.1929	2.32901e-08	2.49147e-07
ENSMUSG00000020605.10	chr12	8363431	8393824	+	Hs1bp3	-0.359107	5.61409	82.1503	2.3385e-08	2.4995e-07
ENSMUSG00000015869.17	chr11	116361670	116385028	-	Prpsap1	-0.328049	6.53411	82.0246	2.36677e-08	2.52756e-07
ENSMUSG00000041841.9	chr15	5146126	5148622	+	Rpl37	0.593323	8.20595	124.059	2.3717e-08	2.53068e-07
ENSMUSG00000085342.2	chr11	58399616	58400087	-	Gm12254	0.466538	5.12747	81.9336	2.38747e-08	2.54535e-07
ENSMUSG00000025026.16	chr19	53128873	53235830	+	Add3	0.440263	5.12846	81.8197	2.41368e-08	2.57112e-07
ENSMUSG00000001366.15	chr9	77988780	78016347	-	Fbxo9	0.496226	4.46502	81.685	2.44507e-08	2.60236e-07
ENSMUSG00000079003.4	chr8	84724129	84727038	+	Samd1	0.360833	5.49927	81.6495	2.45341e-08	2.60902e-07
ENSMUSG00000087412.5	chr7	92828189	92833383	-	Gm15501	0.548283	6.59638	101.91	2.45769e-08	2.61138e-07
ENSMUSG00000111394.2	chr9	59580096	59583983	+	Gm49759	0.488261	5.78767	81.8721	2.47748e-08	2.63018e-07
ENSMUSG00000051817.9	chr2	152235530	152239983	-	Sox12	0.568992	4.04119	81.5217	2.48373e-08	2.63238e-07
ENSMUSG00000108366.2	chr7	16453040	16453835	-	Gm5586	0.502254	4.5314	81.5267	2.48253e-08	2.63238e-07
ENSMUSG00000003814.9	chr8	85568478	85573563	-	Calr	-0.259371	9.30731	81.4105	2.51045e-08	2.65845e-07
ENSMUSG00000024875.6	chr19	5138565	5142909	+	Yif1a	-0.603891	5.18171	84.0041	2.51631e-08	2.66242e-07
ENSMUSG00000083282.4	chr19	4905157	4910946	+	Ctsf	0.842331	2.77818	81.3463	2.52601e-08	2.67038e-07
ENSMUSG00000029570.6	chr5	140593074	140601300	+	Lfng	0.909817	3.16323	81.3378	2.52807e-08	2.67038e-07
ENSMUSG00000049871.15	chr16	3762870	3794496	-	Nlrc3	-0.72413	3.18467	81.3081	2.53532e-08	2.6758e-07
ENSMUSG00000007659.19	chr2	152622587	152673648	-	Bcl2l1	-0.436809	5.58828	81.1921	2.56382e-08	2.70361e-07
ENSMUSG00000027447.7	chr2	148713641	148717612	-	Cst3	-0.332068	7.79784	81.1497	2.57435e-08	2.71244e-07
ENSMUSG00000016181.10	chr1	192773411	192812580	-	Utp25	-0.418282	4.88616	81.1113	2.5839e-08	2.71795e-07
ENSMUSG00000014551.9	chr6	92146505	92161014	-	Mrps25	-0.501978	4.83012	81.1173	2.5824e-08	2.71795e-07
ENSMUSG00000032580.13	chr9	107617569	107648195	-	Rbm5	0.297444	7.32648	81.0913	2.58889e-08	2.72093e-07
ENSMUSG00000074781.6	chr10	95351006	95381519	+	Ube2n	-0.310947	6.83377	81.0779	2.59226e-08	2.7222e-07
ENSMUSG00000063875.7	chr15	76221815	76222562	+	Rps6-ps1	0.657259	3.41347	81.0543	2.59816e-08	2.72612e-07
ENSMUSG00000022404.9	chr15	81203111	81245013	-	Slc25a17	0.327941	6.28981	80.9067	2.63551e-08	2.76301e-07
ENSMUSG00000021707.6	chr13	92491233	92525561	+	Dhfr	-0.54902	5.23501	80.8258	2.65623e-08	2.78241e-07
ENSMUSG00000058905.6	chr5	133503961	133504375	+	Gm10051	0.505178	5.13761	80.629	2.70739e-08	2.83364e-07
ENSMUSG00000035530.14	chr11	100210710	100212922	+	Eif1	0.355346	8.41022	80.8438	2.71524e-08	2.83951e-07
ENSMUSG00000031490.7	chr8	27750356	27766702	+	Eif4ebp1	-0.34213	8.06283	80.5453	2.72947e-08	2.85201e-07
ENSMUSG00000118353.2	chr19	22418498	22419278	+	Nsa2-ps1	0.477341	4.84845	80.5316	2.73309e-08	2.85343e-07
ENSMUSG00000019878.9	chr10	57362480	57389231	+	Hsf2	0.421901	5.93333	80.2568	2.80713e-08	2.9283e-07
ENSMUSG00000073147.4	chr5	23587305	23639267	-	5031425E22Rik	0.756294	3.08365	80.226	2.81556e-08	2.93466e-07
ENSMUSG00000095123.2	chr10	4341586	4346424	+	Gm21781	0.618191	4.03235	80.2141	2.81882e-08	2.93526e-07
ENSMUSG00000031487.6	chr8	27613391	27618708	-	Brf2	-0.543673	4.17385	80.2069	2.82079e-08	2.93526e-07
ENSMUSG00000027944.14	chr3	89902752	89906087	-	Hax1	-0.399399	6.57197	80.1467	2.8374e-08	2.9501e-07
ENSMUSG00000062580.10	chr1	135222950	135241516	-	Timm17a	-0.471548	5.15273	80.0852	2.85447e-08	2.96295e-07
ENSMUSG00000059895.14	chr15	73594993	73630615	+	Ptp4a3	-0.480141	5.09319	80.0914	2.85276e-08	2.96295e-07
ENSMUSG00000080921.5	chr6	140692685	140692898	-	Rpl38-ps2	0.474278	5.86945	81.8867	2.90584e-08	3.01379e-07
ENSMUSG00000053907.11	chr6	72409781	72416541	-	Mat2a	0.300221	8.06282	79.8434	2.9227e-08	3.02879e-07
ENSMUSG00000038697.16	chr8	124723056	124748136	-	Taf5l	-0.331739	6.07452	79.8345	2.92523e-08	3.02891e-07
ENSMUSG00000029223.13	chr5	66833433	66844577	+	Uchl1	1.26748	2.16507	79.8072	2.93305e-08	3.0338e-07
ENSMUSG00000037493.7	chr9	54452077	54467502	-	Cib2	0.768456	3.17646	79.8013	2.93477e-08	3.0338e-07
ENSMUSG00000038203.22	chr6	52234673	52237788	-	Hoxa13	0.513444	4.8424	79.7745	2.94247e-08	3.03926e-07
ENSMUSG00000044308.18	chr2	69727589	69854357	+	Ubr3	0.350897	6.93939	79.7409	2.95215e-08	3.04427e-07
ENSMUSG00000063406.12	chr5	108254231	108280486	-	Tmed5	-0.374149	6.24626	79.7419	2.95186e-08	3.04427e-07
ENSMUSG00000032064.18	chr9	50574051	50650817	-	Dixdc1	0.559806	4.06676	79.6451	2.98e-08	3.07047e-07
ENSMUSG00000007950.10	chr8	71909348	71916299	-	Abhd8	0.447576	5.86882	79.6124	2.98956e-08	3.07781e-07
ENSMUSG00000085442.2	chr15	37943570	37944036	-	Gm3362	0.459801	6.39574	84.9795	3.02009e-08	3.1067e-07
ENSMUSG00000022749.9	chr16	56989224	57051867	-	Tbc1d23	0.393639	5.34441	79.4069	3.05048e-08	3.13539e-07
ENSMUSG00000028957.13	chr4	151088108	151129122	-	Per3	0.712424	4.14155	79.3367	3.07157e-08	3.15193e-07
ENSMUSG00000030337.17	chr6	125192513	125222927	+	Vamp1	0.615363	4.44816	79.3426	3.06978e-08	3.15193e-07
ENSMUSG00000026020.10	chr1	59724129	59758203	+	Nop58	-0.272394	6.95437	79.2684	3.09228e-08	3.16815e-07
ENSMUSG00000112605.2	chr12	49822897	49823558	-	Gm7476	0.655611	3.82297	79.268	3.09241e-08	3.16815e-07
ENSMUSG00000061979.9	chr5	134176892	134205613	-	Rcc1l	-0.449399	4.54924	79.2181	3.10762e-08	3.18115e-07
ENSMUSG00000050395.10	chr4	63642839	63663350	-	Tnfsf15	-0.895	2.9494	79.138	3.13222e-08	3.19759e-07
ENSMUSG00000030591.18	chr7	28873612	28880126	-	Psmd8	-0.331841	7.8546	79.1433	3.13059e-08	3.19759e-07
ENSMUSG00000034330.11	chr8	118225029	118361881	+	Plcg2	0.635016	4.0555	79.1328	3.13385e-08	3.19759e-07
ENSMUSG00000084131.2	chrX	73214258	73215472	+	Rpl3-ps2	0.57398	6.53648	104.262	3.13138e-08	3.19759e-07
ENSMUSG00000020592.15	chr12	8821322	8843715	+	Sdc1	-0.319918	6.90553	79.0615	3.15593e-08	3.21752e-07
ENSMUSG00000081137.4	chrX	168151184	168152999	+	BC022960	-0.682598	3.61501	78.9136	3.20234e-08	3.26218e-07
ENSMUSG00000033931.10	chr8	127673921	127697821	-	Rbm34	-0.400553	5.40312	78.8492	3.22275e-08	3.28033e-07
ENSMUSG00000022505.10	chr16	10099612	10131832	-	Emp2	-0.255642	8.4544	78.8125	3.23447e-08	3.28959e-07
ENSMUSG00000036412.6	chr18	61044851	61051633	+	Arsi	-1.12748	1.90362	78.6301	3.29337e-08	3.34679e-07
ENSMUSG00000007038.6	chr17	35150228	35154929	+	Neu1	0.381912	5.71207	78.6118	3.29934e-08	3.34746e-07
ENSMUSG00000000628.11	chr6	82702005	82751435	-	Hk2	-0.346144	6.13716	78.6136	3.29877e-08	3.34746e-07
ENSMUSG00000000486.14	chr7	126813618	126832302	-	Septin1	0.980324	1.87644	78.5932	3.30544e-08	3.35095e-07
ENSMUSG00000007891.17	chr7	141929647	141941775	-	Ctsd	-0.269435	9.43628	78.5797	3.30987e-08	3.35275e-07
ENSMUSG00000049866.13	chr1	88600846	88629943	-	Arl4c	-0.313842	6.43837	78.5511	3.31924e-08	3.35953e-07
ENSMUSG00000022216.18	chr14	55815579	55818986	+	Psme1	-0.425982	5.90661	78.3589	3.38314e-08	3.42146e-07
ENSMUSG00000003812.14	chr8	85635188	85649544	+	Dnase2a	-0.520344	4.52591	78.261	3.41624e-08	3.45216e-07
ENSMUSG00000000693.11	chr6	83011153	83029543	+	Loxl3	-0.352536	6.65395	78.2355	3.42488e-08	3.45811e-07
ENSMUSG00000025451.16	chr13	119565136	119594754	+	Paip1	0.285986	6.82237	78.1776	3.44467e-08	3.47252e-07
ENSMUSG00000030079.16	chr6	88442390	88474554	+	Ruvbl1	-0.344005	6.2283	78.1801	3.44382e-08	3.47252e-07
ENSMUSG00000029551.14	chr5	139809346	139812640	-	Psmg3	-0.595017	4.14071	78.1419	3.45695e-08	3.48212e-07
ENSMUSG00000010601.15	chr15	77272418	77283310	-	Apol7a	-1.11463	2.68523	78.1168	3.4656e-08	3.48804e-07
ENSMUSG00000040455.18	chr4	21767155	21837872	+	Usp45	0.524069	5.44987	78.2921	3.48546e-08	3.50522e-07
ENSMUSG00000042106.6	chr9	107861421	107863078	-	Inka1	-0.845339	2.55223	78.0312	3.49525e-08	3.51226e-07
ENSMUSG00000029061.3	chr4	155735111	155737841	-	Mmp23	-0.463136	5.30289	77.9924	3.5088e-08	3.52307e-07
ENSMUSG00000039831.17	chr3	121746189	121810402	+	Arhgap29	-0.320036	7.07529	77.9531	3.52259e-08	3.5341e-07
ENSMUSG00000085385.8	chr2	158195619	158203500	-	Snhg17	-0.385985	6.06642	77.9245	3.53264e-08	3.54136e-07
ENSMUSG00000025362.7	chr10	128460402	128462616	-	Rps26	0.550615	9.09301	113.889	3.59946e-08	3.60548e-07
ENSMUSG00000001018.16	chr3	90395332	90398340	-	Snapin	0.408478	5.55989	77.6763	3.62131e-08	3.62448e-07
ENSMUSG00000020986.14	chr12	59005168	59058803	-	Sec23a	0.30312	6.30478	77.6162	3.64315e-08	3.64344e-07
ENSMUSG00000061684.7	chr18	82541663	82542146	-	Rpl21-ps8	0.558157	4.62037	77.425	3.71361e-08	3.71096e-07
ENSMUSG00000020133.9	chr10	80154087	80156371	-	2310011J03Rik	-0.444482	5.25838	77.392	3.72594e-08	3.72033e-07
ENSMUSG00000016534.16	chrX	37490233	37545331	-	Lamp2	0.262523	9.22658	77.3175	3.7539e-08	3.74527e-07
ENSMUSG00000004929.13	chr10	80905868	80918393	+	Thop1	-0.340098	6.66689	77.1241	3.82756e-08	3.81574e-07
ENSMUSG00000095253.5	chr17	33034422	33049235	-	Zfp799	0.504429	4.30786	77.1085	3.8336e-08	3.81874e-07
ENSMUSG00000028760.17	chr4	137720332	137935819	+	Eif4g3	0.642059	6.11289	107.572	3.84514e-08	3.8272e-07
ENSMUSG00000021403.4	chr13	33211398	33225867	+	Serpinb9b	-0.831534	3.14585	76.9945	3.87783e-08	3.85652e-07
ENSMUSG00000028706.15	chr4	115890038	115911073	-	Nsun4	-0.447907	4.54855	76.9871	3.88072e-08	3.85652e-07
ENSMUSG00000049184.7	chr8	33876352	33907495	+	Purg	0.628834	3.53882	76.953	3.8941e-08	3.86676e-07
ENSMUSG00000119584.1	chr17	40157243	40159092	+	Rn18s	0.871343	9.59027	172.479	3.9698e-08	3.93883e-07
ENSMUSG00000003546.11	chr17	46941549	46956948	-	Klc4	0.595366	4.29539	76.6885	3.99944e-08	3.96429e-07
ENSMUSG00000074480.5	chr3	88439701	88448703	+	Mex3a	0.51018	6.16302	87.5543	4.00176e-08	3.96429e-07
ENSMUSG00000032060.11	chr9	50662624	50667936	+	Cryab	0.695766	4.14502	76.4516	4.09647e-08	4.05492e-07
ENSMUSG00000024181.10	chr17	26342473	26345587	+	Mrpl28	-0.420428	5.84608	76.3283	4.14802e-08	4.10273e-07
ENSMUSG00000038406.18	chr7	44652371	44665787	-	Scaf1	0.275403	7.4932	76.2472	4.18229e-08	4.13338e-07
ENSMUSG00000033460.15	chrX	133618711	133622666	+	Armcx1	0.618481	4.44752	76.1297	4.23251e-08	4.17973e-07
ENSMUSG00000059142.17	chr17	23065670	23086108	-	Zfp945	0.49431	5.36841	76.1212	4.23619e-08	4.18009e-07
ENSMUSG00000023367.15	chr6	48817852	48824005	+	Tmem176a	-0.450101	5.56138	76.0036	4.28718e-08	4.22709e-07
ENSMUSG00000020205.9	chr10	111342146	111344506	+	Phlda1	-0.623452	5.07734	78.4649	4.34552e-08	4.28126e-07
ENSMUSG00000020537.10	chr11	60345416	60359580	+	Drg2	-0.353087	6.23492	75.7736	4.38885e-08	4.32056e-07
ENSMUSG00000001576.16	chr17	26780462	26875908	+	Ergic1	-0.248062	8.265	75.7288	4.409e-08	4.33363e-07
ENSMUSG00000111128.2	chr9	45769901	45771980	-	Gm49338	0.846157	2.59648	75.7311	4.40796e-08	4.33363e-07
ENSMUSG00000037720.17	chr5	67417907	67448804	+	Tmem33	0.273911	6.44507	75.6904	4.42631e-08	4.34725e-07
ENSMUSG00000035754.9	chr10	79795985	79806037	+	Wdr18	-0.362971	6.37831	75.6799	4.43104e-08	4.34849e-07
ENSMUSG00000117822.2	chr19	17903986	17905373	+	Eef1a1-ps1	0.74262	7.37195	138.197	4.43448e-08	4.34849e-07
ENSMUSG00000021144.15	chr12	113061897	113100826	+	Mta1	0.271878	7.09603	75.6253	4.45584e-08	4.36603e-07
ENSMUSG00000039048.16	chr9	35115501	35122351	-	Foxred1	-0.547121	4.53483	75.5565	4.4873e-08	4.39344e-07
ENSMUSG00000005609.17	chr7	110628157	110655584	+	Ctr9	-0.358163	6.27484	75.5118	4.50786e-08	4.41014e-07
ENSMUSG00000005124.11	chr15	66763168	66795050	+	Ccn4	-0.23865	8.48474	75.4773	4.52384e-08	4.42234e-07
ENSMUSG00000020167.15	chr10	80245347	80269481	-	Tcf3	0.260694	7.79405	75.4538	4.53475e-08	4.42777e-07
ENSMUSG00000030879.11	chr7	105452412	105460306	-	Mrpl17	-0.442764	4.72807	75.4501	4.53643e-08	4.42777e-07
ENSMUSG00000001506.11	chr11	94827049	94843868	+	Col1a1	-0.642095	12.1518	120.088	4.56975e-08	4.45683e-07
ENSMUSG00000106037.2	chr3	119503164	119503510	+	Gm4332	0.467003	7.16166	88.6666	4.59198e-08	4.47505e-07
ENSMUSG00000041747.4	chr13	98383352	98399549	-	Utp15	-0.34738	5.71778	75.2961	4.60863e-08	4.4878e-07
ENSMUSG00000089715.13	chr15	79708096	79718889	-	Cbx6	0.299638	8.27241	75.201	4.6538e-08	4.52829e-07
ENSMUSG00000031146.7	chrX	7534179	7537629	-	Plp2	0.363343	6.63216	75.1569	4.67493e-08	4.54533e-07
ENSMUSG00000063754.8	chr19	28980807	28981242	-	Gm10136	0.562897	4.74379	75.1061	4.69941e-08	4.5656e-07
ENSMUSG00000021266.17	chr12	108825955	108860100	-	Wars	-0.310669	7.11791	75.0969	4.70386e-08	4.56641e-07
ENSMUSG00000074405.9	chr7	5023374	5039767	+	Zfp865	0.344969	5.725	75.0719	4.71597e-08	4.57464e-07
ENSMUSG00000032637.16	chr7	126090879	126102609	-	Atxn2l	0.26831	8.49278	75.0221	4.74016e-08	4.59457e-07
ENSMUSG00000024436.17	chr17	36221270	36227281	-	Mrps18b	-0.445048	5.17928	75.0105	4.74585e-08	4.59654e-07
ENSMUSG00000007039.13	chr17	35278010	35281071	+	Ddah2	0.432575	5.18437	74.9158	4.79234e-08	4.638e-07
ENSMUSG00000057672.17	chr8	84393164	84425808	-	Pkn1	0.296978	7.54813	74.8594	4.82028e-08	4.66145e-07
ENSMUSG00000004980.17	chr6	51437911	51446874	-	Hnrnpa2b1	0.286321	9.5841	74.8102	4.84476e-08	4.68154e-07
ENSMUSG00000072582.10	chr11	86574810	86583283	+	Ptrh2	-0.438306	5.39299	74.7659	4.86696e-08	4.69578e-07
ENSMUSG00000001518.13	chr6	128386406	128401894	-	Itfg2	-0.611984	4.00166	74.767	4.8664e-08	4.69578e-07
ENSMUSG00000035246.17	chrX	92698468	92793557	+	Pcyt1b	0.856842	3.55042	74.5993	4.95141e-08	4.77359e-07
ENSMUSG00000023960.14	chr17	44389703	44397458	+	Enpp5	1.125	2.40558	74.525	4.9896e-08	4.80206e-07
ENSMUSG00000034595.18	chr17	36176484	36186488	+	Ppp1r18	0.258071	7.12915	74.5301	4.98695e-08	4.80206e-07
ENSMUSG00000036186.6	chr2	26518468	26526509	+	Dipk1b	0.559603	4.45358	74.5196	4.99237e-08	4.80206e-07
ENSMUSG00000071350.13	chr14	59639457	59678333	-	Setdb2	-0.595928	3.71748	74.4134	5.04759e-08	4.85146e-07
ENSMUSG00000041781.10	chr12	101942246	101972683	+	Cpsf2	-0.348138	6.48789	74.3813	5.06439e-08	4.8639e-07
ENSMUSG00000017715.12	chr11	117877117	117914837	+	Pgs1	-0.369467	5.95274	74.2404	5.13889e-08	4.93168e-07
ENSMUSG00000033216.10	chr6	88234315	88423521	-	Eefsec	-0.419231	5.00197	74.2165	5.15167e-08	4.94019e-07
ENSMUSG00000023963.11	chr17	43978315	44062322	+	Cyp39a1	-0.76101	3.63326	74.1647	5.17942e-08	4.96302e-07
ENSMUSG00000065979.13	chr16	11621584	11727309	-	Cpped1	-0.494345	4.58136	74.1185	5.20433e-08	4.9831e-07
ENSMUSG00000100865.3	chr17	71160761	71183307	+	Gm9320	0.544252	4.58637	74.103	5.21274e-08	4.98736e-07
ENSMUSG00000031133.13	chrX	56276844	56384089	-	Arhgef6	0.471789	4.45492	74.0154	5.26044e-08	5.02918e-07
ENSMUSG00000063253.12	chr8	84156712	84185020	-	Scoc	0.308494	6.24968	73.9119	5.31741e-08	5.07978e-07
ENSMUSG00000030802.15	chr7	127503253	127509393	+	Bckdk	-0.447434	5.48241	73.8568	5.34798e-08	5.10511e-07
ENSMUSG00000016206.7	chr17	37581110	37585375	+	H2-M3	-0.964502	2.1298	73.8417	5.3564e-08	5.10928e-07
ENSMUSG00000024360.9	chr18	35035837	35065060	-	Etf1	-0.265074	7.69042	73.7982	5.38074e-08	5.12861e-07
ENSMUSG00000026389.17	chr1	120118486	120200435	-	Steap3	-0.368993	6.19448	73.7645	5.39971e-08	5.14279e-07
ENSMUSG00000024019.19	chr17	29879568	29924953	+	Cmtr1	-0.339674	7.271	73.7196	5.42503e-08	5.163e-07
ENSMUSG00000089917.8	chr2	181210941	181226685	-	Uckl1	0.458243	4.34954	73.6929	5.44021e-08	5.17354e-07
ENSMUSG00000029405.17	chr5	92200004	92231578	-	G3bp2	-0.275965	7.05337	73.6361	5.47252e-08	5.20034e-07
ENSMUSG00000054619.8	chr15	100202020	100226543	+	Mettl7a1	1.08984	1.86998	73.6241	5.47943e-08	5.20298e-07
ENSMUSG00000001833.18	chr9	25163734	25219867	+	Septin7	-0.244504	7.84031	73.6082	5.48851e-08	5.20768e-07
ENSMUSG00000058351.12	chr14	30810088	30850913	-	Smim4	1.24164	1.85937	73.5908	5.49851e-08	5.21323e-07
ENSMUSG00000022894.7	chr16	85653060	85698716	-	Adamts5	-0.242576	7.86444	73.5669	5.51226e-08	5.22233e-07
ENSMUSG00000035504.17	chr10	80165786	80172275	+	Reep6	0.43808	5.51804	73.511	5.54457e-08	5.24767e-07
ENSMUSG00000033809.16	chr16	20424123	20430485	-	Alg3	-0.60635	4.07826	73.5062	5.54734e-08	5.24767e-07
ENSMUSG00000028567.9	chr4	108691797	108719324	+	Txndc12	-0.351684	6.20175	73.4953	5.55366e-08	5.24971e-07
ENSMUSG00000059851.16	chr7	4743113	4750513	+	Kmt5c	0.51144	5.07273	73.455	5.57713e-08	5.26794e-07
ENSMUSG00000024948.16	chr19	6391164	6405645	+	Map4k2	0.414886	4.76813	73.4327	5.59017e-08	5.2763e-07
ENSMUSG00000029482.5	chr5	125552877	125594474	+	Aacs	-0.31283	6.28594	73.39	5.61524e-08	5.29599e-07
ENSMUSG00000028199.19	chr3	154302347	154328819	+	Cryz	0.522106	4.50121	73.3634	5.63089e-08	5.30678e-07
ENSMUSG00000032816.16	chr9	65008767	65045222	+	Igdcc4	0.39106	5.20049	73.3295	5.65094e-08	5.32169e-07
ENSMUSG00000055531.13	chr10	117180577	117215920	-	Cpsf6	0.300098	7.61821	73.301	5.66785e-08	5.33342e-07
ENSMUSG00000037242.9	chr4	134941279	135000125	-	Clic4	-0.255129	8.56341	73.2942	5.67187e-08	5.33342e-07
ENSMUSG00000066037.15	chr4	136038252	136086758	+	Hnrnpr	0.300547	6.6084	73.2543	5.69567e-08	5.3518e-07
ENSMUSG00000066553.6	chr12	24688667	24689009	-	Gm6969	0.564346	4.19538	73.1684	5.7472e-08	5.3962e-07
ENSMUSG00000083424.4	chr2	108705270	108705603	-	Rpl35a-ps4	0.552997	4.15733	73.1154	5.77927e-08	5.42226e-07
ENSMUSG00000004655.6	chr6	55313416	55325540	+	Aqp1	-0.565078	6.93939	90.7186	5.79939e-08	5.43709e-07
ENSMUSG00000041482.18	chr18	63143283	63520254	-	Piezo2	0.459758	5.85019	73.0723	5.80553e-08	5.43805e-07
ENSMUSG00000031176.9	chrX	9520505	9529242	-	Dynlt3	0.356357	6.61167	73.0665	5.80905e-08	5.43805e-07
ENSMUSG00000023067.15	chr17	29309949	29319701	+	Cdkn1a	0.751394	3.69229	72.9598	5.87463e-08	5.49536e-07
ENSMUSG00000054604.8	chr16	64672358	64679870	+	Cggbp1	-0.276365	6.50033	72.9063	5.90781e-08	5.52229e-07
ENSMUSG00000044147.9	chr12	69418923	69420557	+	Arf6	-0.272921	7.16054	72.8862	5.92026e-08	5.52727e-07
ENSMUSG00000022351.15	chr15	59186925	59203041	+	Sqle	-0.289829	7.36844	72.8836	5.92191e-08	5.52727e-07
ENSMUSG00000031781.15	chr8	95546431	95564986	-	Ciapin1	-0.331597	6.02632	72.6666	6.05897e-08	5.651e-07
ENSMUSG00000031963.9	chr9	23134371	23396496	+	Bmper	-1.30741	2.29061	72.5714	6.12018e-08	5.70387e-07
ENSMUSG00000041654.16	chr11	113135678	113540905	-	Slc39a11	-0.432153	4.99951	72.4835	6.17736e-08	5.75289e-07
ENSMUSG00000024150.13	chr17	87561870	87573363	-	Mcfd2	-0.286407	6.50471	72.4445	6.20286e-08	5.77237e-07
ENSMUSG00000030717.10	chr7	126222420	126230033	-	Nupr1	-0.40231	7.67625	79.4842	6.21147e-08	5.77612e-07
ENSMUSG00000086925.2	chr1	166773165	166773927	-	Gm6286	0.467685	4.47913	72.3152	6.28838e-08	5.83471e-07
ENSMUSG00000089774.3	chr16	91855209	91884361	+	Slc5a3	0.736451	5.79092	105.098	6.28827e-08	5.83471e-07
ENSMUSG00000082064.4	chr2	154545728	154546619	+	Rpl5-ps2	0.577142	4.00464	72.3236	6.28281e-08	5.83471e-07
ENSMUSG00000022538.21	chr16	30379311	30406410	-	Lsg1	-0.310247	6.02202	72.2464	6.33445e-08	5.87312e-07
ENSMUSG00000069892.10	chr11	48906700	48942069	-	9930111J21Rik2	-0.602012	5.5844	85.6393	6.34495e-08	5.87853e-07
ENSMUSG00000026520.9	chr1	180731857	180735653	+	Pycr2	-0.359276	5.73791	72.0294	6.48207e-08	5.99235e-07
ENSMUSG00000049881.14	chr1	157239921	157247806	+	2810025M15Rik	-0.546191	4.93105	72.0376	6.47645e-08	5.99235e-07
ENSMUSG00000045455.9	chr10	11484966	11485579	+	Gm9797	-0.807588	3.89715	75.7078	6.4786e-08	5.99235e-07
ENSMUSG00000028121.9	chr3	122087784	122323840	+	Bcar3	-0.521675	4.73138	71.9671	6.52514e-08	6.02773e-07
ENSMUSG00000026377.13	chr1	118249568	118261552	+	Nifk	-0.381308	5.34459	71.9488	6.53786e-08	6.03505e-07
ENSMUSG00000033060.17	chr14	101967392	102172146	+	Lmo7	-0.550885	4.96587	71.9398	6.54416e-08	6.03645e-07
ENSMUSG00000066232.5	chr7	109617480	109655816	+	Ipo7	0.287579	8.13813	71.8997	6.57214e-08	6.05782e-07
ENSMUSG00000019256.18	chr12	35547972	35585037	-	Ahr	-0.315348	6.82985	71.8636	6.59745e-08	6.0767e-07
ENSMUSG00000041355.14	chr3	88483182	88495726	+	Ssr2	-0.331266	7.4746	71.7523	6.67615e-08	6.1447e-07
ENSMUSG00000035772.12	chr2	28358077	28361190	+	Mrps2	-0.374382	5.43353	71.6171	6.77318e-08	6.22945e-07
ENSMUSG00000063334.17	chr10	111808568	111824337	+	Krr1	-0.325405	6.62827	71.4807	6.87264e-08	6.31631e-07
ENSMUSG00000002455.15	chr2	181233660	181297453	+	Prpf6	0.388059	6.01615	71.4739	6.87767e-08	6.31632e-07
ENSMUSG00000090958.3	chr7	98138489	98151388	+	Lrrc32	-0.234423	8.72405	71.3418	6.97559e-08	6.39729e-07
ENSMUSG00000083621.2	chrX	51861218	51861626	-	Gm14586	0.480511	5.99736	78.0644	6.976e-08	6.39729e-07
ENSMUSG00000034024.9	chr10	116886905	116899719	-	Cct2	0.279051	9.22677	71.3087	7.00038e-08	6.41498e-07
ENSMUSG00000045690.9	chr12	75677369	75716311	-	Wdr89	0.407293	5.58942	71.2762	7.02478e-08	6.42798e-07
ENSMUSG00000032312.8	chr9	57533928	57560914	-	Csk	-0.318581	6.37315	71.2805	7.02156e-08	6.42798e-07
ENSMUSG00000035722.16	chr10	79832327	79851406	+	Abca7	0.341328	5.60301	71.2274	7.06165e-08	6.45702e-07
ENSMUSG00000032440.14	chr9	115913360	116004428	-	Tgfbr2	-0.272225	8.66913	71.2159	7.07035e-08	6.46029e-07
ENSMUSG00000031513.9	chr8	34602725	34614187	-	Leprotl1	-0.356124	7.16303	71.1846	7.09419e-08	6.47655e-07
ENSMUSG00000032044.5	chr9	35179160	35189027	+	Rpusd4	-0.434163	4.38378	71.179	7.09844e-08	6.47655e-07
ENSMUSG00000058600.14	chr15	34440650	34443786	-	Rpl30	0.471285	8.21546	91.5474	7.10534e-08	6.47815e-07
ENSMUSG00000023048.14	chr15	102367462	102371241	+	Prr13	0.338873	5.93023	71.1489	7.12138e-08	6.48808e-07
ENSMUSG00000028443.7	chr4	41465150	41480926	+	Nudt2	-0.667321	3.55024	71.1234	7.1409e-08	6.50116e-07
ENSMUSG00000026088.16	chr1	37913881	37929492	-	Mitd1	-0.631574	3.97262	71.043	7.2029e-08	6.55287e-07
ENSMUSG00000096942.2	chr12	110864547	110864985	+	Rps19-ps6	0.853425	4.83686	97.3831	7.21324e-08	6.55754e-07
ENSMUSG00000036087.19	chr5	73071646	73136172	+	Slain2	0.279683	6.549	70.9612	7.26654e-08	6.60123e-07
ENSMUSG00000105144.2	chr3	96573818	96574298	-	Rpl21-ps11	0.728424	4.01019	72.7991	7.29453e-08	6.62187e-07
ENSMUSG00000067367.10	chr5	38377813	38391650	+	Lyar	-0.318545	5.73929	70.7934	7.39906e-08	6.71193e-07
ENSMUSG00000030611.11	chr7	78432866	78442737	+	Mrps11	-0.474198	4.56549	70.7618	7.42424e-08	6.72992e-07
ENSMUSG00000050069.4	chr1	174661350	174749385	-	Grem2	-0.535728	5.87148	80.2982	7.43502e-08	6.73484e-07
ENSMUSG00000027995.11	chr3	83743578	83749074	-	Tlr2	-0.521753	4.00311	70.6903	7.48175e-08	6.7723e-07
ENSMUSG00000090053.10	chr4	57434246	57712016	+	Pakap	-1.17531	2.11441	70.6807	7.48954e-08	6.77448e-07
ENSMUSG00000020902.13	chr11	68100189	68291649	-	Ntn1	-0.596831	4.16268	70.535	7.60833e-08	6.87357e-07
ENSMUSG00000045348.17	chr5	137728160	137739869	-	Nyap1	0.589004	4.18308	70.533	7.61e-08	6.87357e-07
ENSMUSG00000033793.13	chr1	5140240	5232752	+	Atp6v1h	0.342195	6.03162	70.4792	7.65437e-08	6.90798e-07
ENSMUSG00000040618.8	chr14	55777722	55788699	+	Pck2	-0.249839	8.03013	70.4731	7.65943e-08	6.90798e-07
ENSMUSG00000027952.17	chr3	89361847	89376320	+	Pmvk	-0.554011	4.28598	70.4669	7.66456e-08	6.90798e-07
ENSMUSG00000040957.16	chr18	11972276	12078687	+	Cables1	-0.758589	3.37039	70.4201	7.70347e-08	6.93808e-07
ENSMUSG00000026072.13	chr1	40264239	40356417	+	Il1r1	-0.416299	4.99635	70.3978	7.72213e-08	6.94992e-07
ENSMUSG00000027223.16	chr2	92214020	92231608	-	Mapk8ip1	0.526238	4.39246	70.3349	7.7749e-08	6.99241e-07
ENSMUSG00000087408.11	chr8	70768424	70784242	+	Cers1	0.597466	4.07123	70.3243	7.78386e-08	6.99548e-07
ENSMUSG00000032261.17	chr9	83430379	83520854	+	Sh3bgrl2	-0.755907	3.76415	70.134	7.94622e-08	7.1363e-07
ENSMUSG00000018425.19	chr11	86659671	86698572	-	Dhx40	0.374757	6.00006	70.0748	7.99745e-08	7.17718e-07
ENSMUSG00000082474.4	chr6	116172378	116172819	-	Gm8213	0.775868	2.55432	70.0488	8.02006e-08	7.19235e-07
ENSMUSG00000003762.14	chr7	26932447	26957375	+	Coq8b	0.604179	3.78732	69.9661	8.09257e-08	7.25221e-07
ENSMUSG00000027859.11	chr3	102377234	102428329	+	Ngf	-0.682465	3.47636	69.9377	8.11758e-08	7.26945e-07
ENSMUSG00000033610.17	chr19	34784339	34856855	-	Pank1	-0.481822	4.32806	69.8991	8.15179e-08	7.2949e-07
ENSMUSG00000053198.15	chr7	27196812	27219639	+	Prx	-0.562853	4.29895	69.8412	8.20331e-08	7.33579e-07
ENSMUSG00000022462.8	chr15	96585272	96597611	-	Slc38a2	0.240155	9.03831	69.8257	8.21721e-08	7.343e-07
ENSMUSG00000030738.12	chr7	126145626	126165583	-	Eif3c	-0.233733	9.15657	69.7968	8.24315e-08	7.36096e-07
ENSMUSG00002075524.1	chr9	56130998	56131055	-	ENSMUSG00002075524	0.802121	2.85638	69.7715	8.2659e-08	7.37604e-07
ENSMUSG00000021578.18	chr13	74498427	74513902	+	Ccdc127	-0.303293	6.35632	69.738	8.29619e-08	7.39783e-07
ENSMUSG00000067276.6	chrX	142585226	142610410	-	Capn6	0.332215	7.58368	69.7104	8.3212e-08	7.41488e-07
ENSMUSG00000069020.10	chr2	29710086	29735014	+	Urm1	-0.397094	5.49479	69.6677	8.36004e-08	7.44422e-07
ENSMUSG00000031861.17	chr8	70275078	70283752	+	Lpar2	0.672388	3.12903	69.5506	8.46775e-08	7.5348e-07
ENSMUSG00000060743.13	chr1	180628396	180641508	-	H3f3a	0.320206	7.18428	69.4926	8.52162e-08	7.57738e-07
ENSMUSG00000031202.6	chrX	74615651	74621837	-	Rab39b	-0.40028	4.53701	69.4617	8.55043e-08	7.59763e-07
ENSMUSG00000078247.6	chr17	12960197	13079023	+	Airn	0.770012	3.40489	69.4073	8.60151e-08	7.63763e-07
ENSMUSG00000059811.14	chr17	80155818	80203552	-	Atl2	-0.26779	6.38784	69.3803	8.627e-08	7.65487e-07
ENSMUSG00000020743.16	chr11	115498743	115503795	-	Mif4gd	0.687447	3.45941	69.3653	8.64115e-08	7.66202e-07
ENSMUSG00000023009.15	chr15	99319915	99355629	-	Nckap5l	-0.342589	6.06063	69.3474	8.65812e-08	7.67167e-07
ENSMUSG00000021260.9	chr12	108272528	108297128	+	Hhipl1	0.593724	3.69193	69.2722	8.72983e-08	7.7275e-07
ENSMUSG00000023044.3	chr15	102085433	102113159	-	Csad	-0.496092	5.40759	69.4547	8.73341e-08	7.7275e-07
ENSMUSG00000033788.16	chr6	83985571	84188042	+	Dysf	0.417324	6.60926	73.628	8.74879e-08	7.73567e-07
ENSMUSG00000089803.4	chr1	171971840	171972468	-	Gm10171	-0.531917	4.19293	69.101	8.89549e-08	7.85987e-07
ENSMUSG00000036995.8	chr4	135933675	135972527	+	Asap3	0.570919	4.38305	69.0473	8.94809e-08	7.9008e-07
ENSMUSG00000007041.10	chr17	35268941	35277725	+	Clic1	0.273226	7.77641	69.0268	8.96834e-08	7.91313e-07
ENSMUSG00000053091.17	chr7	66339636	66367004	+	Lins1	-0.454054	4.72244	68.9648	9.02965e-08	7.96165e-07
ENSMUSG00000041571.11	chr7	15651132	15656327	-	Selenow	-0.309166	6.44174	68.9402	9.05417e-08	7.97768e-07
ENSMUSG00000009585.19	chr15	79775859	79800107	+	Apobec3	-0.39684	5.48491	68.8473	9.14735e-08	8.04851e-07
ENSMUSG00000024379.5	chr18	32948435	32952850	+	Tslp	-1.17569	2.40559	68.8514	9.14322e-08	8.04851e-07
ENSMUSG00000070327.15	chr11	119283925	119378244	+	Rnf213	-1.25515	7.71041	211.134	9.1659e-08	8.05921e-07
ENSMUSG00000028651.13	chr4	123020907	123033744	-	Ppie	-0.402514	4.64659	68.8149	9.18004e-08	8.06601e-07
ENSMUSG00000024193.9	chr17	27152025	27156882	+	Phf1	0.433547	5.48093	68.7689	9.22676e-08	8.09576e-07
ENSMUSG00000039202.13	chr7	78922946	79015256	+	Abhd2	-0.31117	6.71916	68.7698	9.22584e-08	8.09576e-07
ENSMUSG00000050335.18	chr14	47605207	47623617	+	Lgals3	-0.309543	8.54925	68.7143	9.28252e-08	8.13901e-07
ENSMUSG00000022323.12	chr15	34484166	34495401	-	Rida	0.439906	4.75627	68.6769	9.32089e-08	8.16696e-07
ENSMUSG00000031311.18	chrX	100472923	100492197	+	Nono	0.222089	8.82039	68.6567	9.34175e-08	8.17955e-07
ENSMUSG00000078816.11	chr7	3337703	3379615	+	Prkcg	1.09019	1.83217	68.5986	9.40188e-08	8.22648e-07
ENSMUSG00000026627.8	chr1	191058108	191083111	+	Pacc1	0.507065	4.16899	68.4791	9.52702e-08	8.33019e-07
ENSMUSG00000036078.17	chr4	41738492	41756157	-	Sigmar1	-0.378549	5.48899	68.4542	9.55329e-08	8.34736e-07
ENSMUSG00000019961.18	chr10	90983432	91017177	-	Tmpo	-0.266176	8.17272	68.4366	9.57195e-08	8.35787e-07
ENSMUSG00000031400.11	chrX	73453088	73472800	-	G6pdx	-0.269065	6.64284	68.4102	9.59994e-08	8.3765e-07
ENSMUSG00000006585.4	chr8	123294753	123300293	+	Cdt1	-0.294234	6.9835	68.3451	9.66947e-08	8.43132e-07
ENSMUSG00000081620.2	chrX	55493247	55493717	-	Gm14633	0.725517	4.30308	75.2365	9.73366e-08	8.48142e-07
ENSMUSG00000021371.6	chr13	43691868	43713667	-	Mcur1	-0.456866	5.10046	68.2664	9.75419e-08	8.49343e-07
ENSMUSG00000022560.10	chr15	76423031	76428808	+	Slc52a2	-0.572716	4.32266	68.2548	9.76677e-08	8.4985e-07
ENSMUSG00000029020.14	chr4	147958055	147989161	-	Mfn2	-0.377298	6.05249	68.2431	9.7795e-08	8.50371e-07
ENSMUSG00000029430.14	chr5	129097132	129101387	+	Ran	-0.262432	8.43184	68.1322	9.90066e-08	8.60312e-07
ENSMUSG00000032221.15	chr9	72345292	72369307	+	Mns1	-0.754187	3.83407	68.0574	9.98331e-08	8.66896e-07
ENSMUSG00000022858.17	chr16	22063298	22084755	-	Tra2b	0.264362	6.71726	68.0144	1.00312e-07	8.70452e-07
ENSMUSG00000071176.11	chr8	14961662	15051085	+	Arhgef10	-0.258628	6.99331	67.9189	1.01384e-07	8.79154e-07
ENSMUSG00000031938.16	chr9	15194632	15217744	-	4931406C07Rik	0.464614	4.71487	67.8581	1.02074e-07	8.84524e-07
ENSMUSG00000024302.17	chr18	23548191	23792772	+	Dtna	0.386077	5.49601	67.7557	1.03246e-07	8.93909e-07
ENSMUSG00000017721.16	chr2	164339439	164350221	+	Pigt	-0.373173	6.15823	67.7511	1.03299e-07	8.93909e-07
[truncated: 11,136 more rows]

## Sheet: EdgeR CTL vs ADE
Gene-ID	Chr	Start	End	Strand	Name	logFC	logCPM	F	PValue	FDR
[truncated: 12,591 more rows]

## Sheet: EdgeR CTL vs SAM
GeneID	Chr	Start	End	Strand	Name	logFC	logCPM	F	PValue	FDR
[truncated: 12,591 more rows]
